# Supplementary material for: A Chemoinformatics Approach to the Discovery of Lead-Like Molecules from Marine and Microbial Sources En Route to Antitumor and Antibiotic Drugs
Source: Mar Drugs. 2014 Jan 27;12(2):757–78. doi: 10.3390/md12020757 (PMC3944514; doi:10.3390/md12020757)
Supplement: Supplementary File 1 — Supplementary Information (XLSX, 1535 KB) [file marinedrugs-12-00757-s001.xlsx]

## Sheet: Table of Contents
A Chemoinformatics Approach to the Discovery of Lead-Like Molecules from Marine and Microbial Sources En Route to Antitumor and Antibiotic Drugs
Florbela Pereira 1,*, Diogo A. R. S. Latino 1,2 and Susana P. Gaudêncio 1
1	CQFB (Centro de Química Fina e Biotecnologia)/REQUIMTE, Departamento de Química, Faculdade de Ciências e Tecnologia, Universidade Nova de Lisboa Campus Caparica,
	Caparica 2829-516, Portugal; E-Mails: dalatino@fc.ul.pt (D.A.R.S.L.); s.gaudencio@fct.unl.pt (S.P.G.)
2	CCMM (Centro de Ciências Moleculares e Materiais), Departamento de Química e Bioquímica, Faculdade de Ciências, Universida Lisboa, Campo Grande, Lisboa 1749-016, Portugal
*	Author to whom correspondence should be addressed; E-Mail: florbela.pereira@fct.unl.pt; Tel.: +351-21-294-8300; Fax: +351-21-294-8550.
Table of Contents
Table S1. Selected 57 lead antibiotic MNPs and MbNPs from the AntiMarin database using the RF antibiotic model.
Table S2. Data set, overall activity, antitumor and antibiotic activities, RF predictions for the overall activity, antitumor and antibiotic activities obtained
for the training set in OOB experiment with 232 CDK descriptors.
Table S3. Data set, overall activity, antitumor and antibiotic activities, RF predictions for the overall activity, antitumor and antibiotic activities obtained
for the test set I.
Table S4. Data set, natural source, overall activity, antitumor and antibiotic activities, RF predictions for the overall activity, antitumor and antibiotic activities obtained
for the test set II.

## Sheet: Table S1
Table S1. Selected 57 lead antibiotic MNPs and MbNPs from the AntiMarin database using the RF antibiotic model.
IDs	Chemical Structure	Probantibiotica
325		0.992
647		0.99
992		0.984
44		0.972
106		0.972
860		0.968
695		0.962
703		0.962
1142		0.958
573		0.95
124		0.934
712		0.932
327		0.93
706		0.93
994		0.92
696		0.918
196		0.916
419		0.914
885		0.914
726		0.912
48372		0.908
704		0.906
105		0.902
861		0.898
337		0.888
733		0.888
493		0.884
176		0.882
735		0.88
892		0.88
697		0.878
586		0.876
734		0.876
484		0.874
272		0.872
521		0.868
579		0.864
723		0.858
585		0.856
483		0.854
827		0.854
745		0.852
897		0.852
128		0.85
702		0.85
48373		0.846
938		0.844
271		0.84
742		0.836
47		0.834
977		0.826
378		0.818
743		0.818
190		0.816
741		0.814
48362		0.814
532		0.802
a Probability of being antibiotic.

## Sheet: Table S2
Table S2. Data set, overall activity, antitumor and antibiotic activities, RF predictions for the overall activity, antitumor and antibiotic activities obtained
for the training set in OOB experiment with 232 CDK descriptors.
CID	SMILES	Overall activity	Antitumor activity	Antibiotic activity	Predicted overall activity	Predicted antitumor activity	Predicted antibiotic activity
4723	C1=CC=C(C=C1)C2C(=O)N=C(O2)N	Active	Active	Non-active	Non-active	Active	Non-active
7868	CC(=C)CC(C)(C)C	Active	Active	Non-active	Non-active	Active	Non-active
9134	C1=CC=C2C(=C1)C=CC3=C2C4=C(N3)C=CC5=CC=CC=C54	Active	Active	Non-active	Active	Active	Non-active
21694	C1=CC2=C3C(=C1)C=CC4=C(C=CC(=C43)C=C2)[N+](=O)[O-]	Active	Active	Non-active	Active	Active	Non-active
19427	CC1=CC2=CC=CC=C2C3=C1C4=CC=CC=C4C=C3	Active	Active	Non-active	Active	Active	Non-active
5954	C1=CC=C2C(=C1)C=CC3=CC4=CC=CC=C4C=C32	Active	Active	Non-active	Active	Active	Non-active
9171	C1=CC=C2C(=C1)C=CC3=C2C=CC4=CC=CC=C43	Active	Active	Non-active	Active	Active	Non-active
9158	C1=CC=C2C=C3C4=CC=CC5=C4C(=CC=C5)C3=CC2=C1	Active	Active	Non-active	Active	Active	Non-active
9152	C1=CC=C2C(=C1)C=CC3=C2C4=CC=CC5=C4C3=CC=C5	Active	Active	Non-active	Active	Active	Non-active
9106	C1=CC=C2C3=C4C(=CC2=C1)C=CC5=CC6=CC=CC=C6C(=C54)C=C3	Active	Active	Non-active	Active	Active	Non-active
6001	CC1=C2C=CC3=CC=CC=C3C2=C(C4=CC=CC=C14)C	Active	Active	Non-active	Active	Active	Non-active
42138	C1=C2C(=CC(=C1Cl)Cl)OC3=CC(=C(C(=C23)Cl)Cl)Cl	Active	Active	Non-active	Active	Active	Non-active
39929	C1=C2C3=CC(=C(C=C3OC2=CC(=C1Cl)Cl)Cl)Cl	Active	Active	Non-active	Active	Active	Non-active
51130	C1=C2C(=CC(=C1Cl)Cl)OC3=C2C(=C(C(=C3Cl)Cl)Cl)Cl	Active	Active	Non-active	Active	Active	Non-active
42140	C1=C2C3=C(C(=C(C=C3OC2=C(C(=C1Cl)Cl)Cl)Cl)Cl)Cl	Active	Active	Non-active	Active	Active	Non-active
38439	C1=C2C(=CC(=C1Cl)Cl)OC3=C(C(=C(C=C3O2)Cl)Cl)Cl	Active	Active	Non-active	Active	Active	Non-active
29575	C1=C2C(=C(C(=C1Cl)Cl)Cl)OC3=C(C(=C(C=C3O2)Cl)Cl)Cl	Active	Active	Non-active	Active	Active	Non-active
18636	C12=C(C(=C(C(=C1Cl)Cl)Cl)Cl)OC3=C(O2)C(=C(C(=C3Cl)Cl)Cl)Cl	Active	Active	Non-active	Active	Active	Non-active
9261	C1=CN=CC=N1	Active	Active	Non-active	Active	Active	Non-active
794323	CCOC(=O)C1=C(NC(=S)N[C@H]1C2=CC(=CC=C2)O)C	Active	Active	Non-active	Non-active	Active	Non-active
3084396	COC1=CC(=CC(=C1OC)OC)CC2=CN=C(N=C2N)N	Active	Active	Non-active	Non-active	Active	Non-active
17184	CN1C2CCC1CC(C2)OC(=O)C(CO)C3=CC=CC=C3	Active	Active	Non-active	Non-active	Active	Non-active
8905	C1CNCCN1	Active	Active	Non-active	Non-active	Active	Non-active
7801	C1=CC(=CC=C1O)O	Active	Active	Non-active	Active	Active	Non-active
6420009	CCN(CC)CCOC1=CC=C(C=C1)C(=C(\Cl)C1=CC=CC=C1)\C1=CC=CC=C1	Active	Active	Non-active	Non-active	Active	Non-active
4413	C1=CC(=CC=C1C(=O)OC2=CC3=C(C=C2)C=C(C=C3)C(=N)N)N=C(N)N	Active	Active	Non-active	Active	Active	Non-active
230076	CC1C(C(CC(O1)OC2CC(OC(C2O)C)OC3=CC4=CC5=C(C(=O)C(C(C5)C(C(=O)C(C(C)O)O)OC)OC6CC(C(C(O6)C)O)OC7CC(C(C(O7)C)O)OC8CC(C(C(O8)C)O)(C)O)C(=C4C(=C3C)O)O)O)O	Active	Active	Active	Active	Non-active	Active
165528	CN(CC1=CN=C2C(=N1)C(=NC(=N2)N)N)C3=CC=C(C=C3)C(=O)N[C@@H](CCC(=O)O)C(=O)O	Active	Active	Non-active	Active	Active	Non-active
104946	C1CCN(C1)CCOC2=CC=C(C=C2)C(=O)C3=C(SC4=C3C=CC(=C4)O)C5=CC=C(C=C5)O	Active	Active	Non-active	Active	Active	Non-active
6326719	CC1C(C(CC(O1)OC2CC(OC(C2O)C)OC3=CC4=CC5=C(C(=O)[C@H]([C@@H](C5)[C@@H](C(=O)[C@H]([C@@H](C)O)O)OC)OC6CC(C(C(O6)C)O)OC7CC(C(C(O7)C)O)OC8CC(C(C(O8)C)O)(C)O)C(=C4C(=C3C)O)O)O)O	Active	Active	Active	Active	Non-active	Active
2733526	CC/C(=C(\C1=CC=CC=C1)/C2=CC=C(C=C2)OCCN(C)C)/C3=CC=CC=C3	Active	Active	Non-active	Active	Active	Non-active
59694	C1CC(N2C=NC=C2C1)C3=CC=C(C=C3)C#N	Active	Active	Non-active	Non-active	Active	Non-active
54900	C1CCN(CC1)CCOC2=CC=C(C=C2)C(=O)C3=C(SC4=C3C=CC(=C4)O)C5=CC=C(C=C5)O	Active	Active	Non-active	Active	Active	Non-active
657220	CC/C(=C(/CC)\C1=CC=C(C=C1)OC(=O)CC)/C2=CC=C(C=C2)OC(=O)CC	Active	Active	Non-active	Active	Active	Non-active
656583	C[C@]12CC[C@H]3[C@H]([C@@H]1CC[C@@H]2O)CC[C@]45[C@@]3(CC(=C([C@H]4O5)O)C#N)C	Active	Active	Non-active	Active	Active	Non-active
610479	CC1=C(C=CC=C1Cl)NC2=CC=CC=C2C(=O)O	Active	Active	Non-active	Non-active	Active	Non-active
449459	CC/C(=C(\C1=CC=C(C=C1)O)/C2=CC=C(C=C2)OCCN(C)C)/C3=CC=CC=C3	Active	Active	Non-active	Active	Active	Non-active
445154	C1=CC(=CC=C1/C=C/C2=CC(=CC(=C2)O)O)O	Active	Active	Non-active	Active	Active	Non-active
444008	C[C@@H]1CC2=C(CCC(=O)C2)[C@@H]3[C@@H]1[C@@H]4CC[C@]([C@]4(CC3)C)(C#C)O	Active	Active	Non-active	Active	Active	Non-active
443953	CC[C@@H]1[C@@]([C@@H]([C@H](C(=O)[C@@H](C[C@@]([C@@H]([C@H]([C@@H]([C@H](C(=O)O1)C)O[C@H]2C[C@@]([C@H]([C@@H](O2)C)O)(C)OC)C)O[C@H]3[C@@H]([C@H](C[C@H](O3)C)N(C)C)OC(=O)CCC(=O)OCC)(C)O)C)C)O)(C)O	Active	Active	Active	Active	Non-active	Active
441371	CC[C@@H]1[C@@]([C@@H]([C@H](C(=O)[C@@H](C[C@@]([C@@H]([C@H]([C@@H]([C@H](C(=O)O1)C)O[C@H]2C[C@@]([C@H]([C@@H](O2)C)O)(C)OC)C)O[C@H]3[C@@H]([C@H](C[C@H](O3)C)N(C)C)OC(=O)CC)(C)O)C)C)O)(C)O	Active	Active	Active	Active	Non-active	Active
441189	CN1C2=C(C(=O)N(C1=O)C)NC=N2	Active	Active	Non-active	Non-active	Active	Non-active
439246	C1[C@H](OC2=CC(=CC(=C2C1=O)O)O)C3=CC=C(C=C3)O	Active	Active	Non-active	Active	Active	Non-active
312145	CC(=O)O[C@@H]1C[C@]2([C@@H](CCC2=O)C3=C1[C@]4([C@H](OC(=O)C5=COC(=C54)C3=O)COC)C)C	Active	Active	Active	Active	Non-active	Active
253602	CC(=O)O[C@@H]1[C@H](CN[C@@H]1CC2=CC=C(C=C2)OC)O	Active	Active	Active	Non-active	Active	Active
249098	CC12CCC3C(C1CCC2(C)O)CCC4C3(COC(=O)C4)C	Active	Active	Non-active	Active	Active	Non-active
220503	CC12CCC3C(C1CCC2O)CCC4=CC(=O)CCC34	Active	Active	Non-active	Active	Active	Non-active
186136	C1=CC(=CC=C1CCN)S(=O)(=O)F	Active	Active	Non-active	Non-active	Active	Non-active
163701	CCN(CC)C(=O)[C@@]1(C[C@@H]1CN)C2=CC=CC=C2	Active	Active	Non-active	Non-active	Active	Non-active
157991	CC(=O)N[C@H](C(=O)O)C(C)(C)SN=O	Active	Active	Non-active	Non-active	Non-active	Non-active
122252	CNCCC(C1=CC=CS1)OC2=CC=CC3=CC=CC=C32	Active	Active	Non-active	Non-active	Active	Non-active
114869	C1CN=C(N1)NC2=C(C=CC3=NSN=C32)C	Active	Active	Non-active	Non-active	Active	Non-active
73094	CC1=CC=C(C=C1)S(=O)(=O)N[C@@H](CCCCN)C(=O)CCl	Active	Active	Non-active	Non-active	Active	Non-active
71398	C[C@H](CC1=CC(=C(C=C1)O)O)[C@@H](C)CC2=CC(=C(C=C2)O)O	Active	Active	Non-active	Active	Active	Non-active
68617	CN[C@H]1CC[C@H](C2=CC=CC=C12)C3=CC(=C(C=C3)Cl)Cl	Active	Active	Non-active	Non-active	Active	Non-active
68554	CC1=C(C(=CC=C1)C)NC2=NCCCS2	Active	Active	Non-active	Non-active	Active	Non-active
54610154	COC1=CC(=CC(=C1O)OC)[C@H]2[C@@H]3[C@H](COC3=O)[C@@H](C4=CC5=C(C=C24)OCO5)OC6C(C(C7C(O6)CO[C@H](O7)C8=CC=CS8)O)O	Active	Active	Non-active	Active	Active	Non-active
53317466	C[C@@]1(C(=O)N2[C@H](C(=O)N3CCC[C@H]3[C@@]2(O1)O)CC4=CC=CC=C4)NC(=O)[C@H]5CN([C@@H]6CC7=CNC8=CC=CC(=C78)C6=C5)C	Active	Active	Non-active	Active	Active	Non-active
20463860	CN1CCC(C(C1)COC2=CC=C(C=C2)OC)C3=CC=CC=C3	Active	Active	Non-active	Non-active	Active	Non-active
16757827	CC(=O)O[C@@H]1[C@H](CNC1CC2=CC=C(C=C2)OC)O	Active	Active	Active	Non-active	Active	Active
11957454	CC(C(=O)OC(C)(C)CC1=CC=C(C=C1)Cl)N	Active	Active	Non-active	Non-active	Active	Non-active
11954041	C[C@]12C[C@@H]([C@H]3[C@H]([C@@H]1CC[C@]2(C#C)O)CCC4=C3C=CC(=C4)O)OC	Active	Active	Non-active	Active	Active	Non-active
9873952	CC1=C([C@@H](OC2=C1C=CC(=C2)OC(=O)C(C)(C)C)C3=CC=C(C=C3)OCCN4CCCCC4)C5=CC=C(C=C5)OC(=O)C(C)(C)C	Active	Active	Non-active	Active	Non-active	Non-active
9859122	C1COCCN1[N+]2=CC(=N)O[N-]2	Active	Active	Non-active	Non-active	Active	Non-active
6603696	C[C@@H](C(=O)OC(C)(C)CC1=CC=C(C=C1)Cl)N	Active	Active	Non-active	Non-active	Active	Non-active
5702269	C[C@H]1C[C@@H]([C@@H]([C@H](/C=C(/[C@H]([C@@H](/C=C\C=C(\C(=O)NC2=CC(=O)C(=C(C1)C2=O)OC)/C)OC)OC(=O)N)\C)C)O)OC	Active	Active	Non-active	Active	Non-active	Active
5179132	CC1C(C(CC(O1)OC2C(CC3=C(C2=O)C(=C4C(=C3)C=C(C(=C4O)C)OC5CC(C(C(O5)C)OC(=O)C)OC6CC(C(C(O6)C)OC)O)O)C(C(=O)C(C(C)O)O)OC)OC7CC(C(C(O7)C)O)OC8CC(C(C(O8)C)OC(=O)C)(C)O)O	Active	Active	Active	Active	Non-active	Active
6437875	CC/C(=C\C(=N/O)\C(=O)N)/C(C)[N+](=O)[O-]	Active	Active	Non-active	Non-active	Non-active	Non-active
6376322	CC(/C=C(\C)/C=C/C(=O)NO)C(=O)C1=CC=C(C=C1)N(C)C	Active	Active	Non-active	Non-active	Active	Non-active
5472495	CC\1=C(C2=C(/C1=C\C3=CC=C(C=C3)S(=O)(=O)C)C=CC(=C2)F)CC(=O)O	Active	Active	Non-active	Active	Active	Non-active
5381092	COC1=CC=C(C=C1)/C(=C(\C2=CC=CC=C2)/[N+](=O)[O-])/C3=CC=C(C=C3)OCCN4CCCC4	Active	Active	Non-active	Non-active	Active	Non-active
5363199	CC(=O)OC/N=[N+](/C)\[O-]	Active	Active	Non-active	Non-active	Non-active	Non-active
5351539	CC1(C(=O)N2C(C(=O)N3CCCC3C2(O1)O)CC4=CC=CC=C4)NC(=O)C5CN(C6CC7=CNC8=CC=CC(=C78)C6=C5)C	Active	Active	Non-active	Active	Active	Non-active
5351489	C[C@]12CC[C@H]3[C@H]([C@@H]1CCC2=O)CCC4=C3C=CC(=C4)OS(=O)(=O)O	Active	Active	Non-active	Non-active	Active	Non-active
5284623	COC1=CC(=CC(=C1O)OC)[C@H]2[C@@H]3C(COC3=O)C(C4=CC5=C(C=C24)OCO5)O[C@H]6[C@@H]([C@H]([C@H]7[C@H](O6)COC(O7)C8=CC=CS8)O)O	Active	Active	Non-active	Active	Active	Non-active
5284360	CN(C)C(=O)COC(=O)CC1=CC=C(C=C1)OC(=O)C2=CC=C(C=C2)N=C(N)N	Active	Active	Non-active	Active	Active	Non-active
5281576	C[C@H]1CCCC(=O)CCC/C=C/C2=CC(=CC(=C2C(=O)O1)O)O	Active	Active	Non-active	Active	Active	Non-active
5281571	C1=CC(=O)C(=C2C(=C1)C=C(C(=C2O)O)O)O	Active	Active	Non-active	Active	Active	Non-active
5281034	C[C@]12CC[C@H]3[C@H]([C@@H]1CC[C@]2(C)O)CC[C@@H]4[C@@]3(C/C(=C/O)/C(=O)C4)C	Active	Active	Non-active	Active	Active	Non-active
5280961	C1=CC(=CC=C1C2=COC3=CC(=CC(=C3C2=O)O)O)O	Active	Active	Non-active	Active	Active	Non-active
3864541	CCN1C=C(C(O)=O)C(=O)C2=C1N=C(C)C=C2	Active	Active	Non-active	Non-active	Active	Non-active
3034011	CC/C(=C(/C1=CC=C(C=C1)OCCN2CCCC2)\C3=CC=C(C=C3)I)/C4=CC=CC=C4	Active	Active	Non-active	Non-active	Active	Non-active
3012003	CN1CC[C@@H]([C@H](C1)COC2=CC=C(C=C2)OC)C3=CC=CC=C3	Active	Active	Non-active	Non-active	Active	Non-active
2759362	C1=CC(=CC(=C1)I)CN=C(N)N	Active	Active	Non-active	Non-active	Active	Non-active
63090	C1=CC(=C(C=C1C2=CC(=C(C(=C2)Cl)Cl)Cl)Cl)Cl	Active	Active	Non-active	Active	Active	Non-active
60834	CNCC[C@@H](C1=CC=CS1)OC2=CC=CC3=CC=CC=C32	Active	Active	Non-active	Non-active	Active	Non-active
57347	C1CN(CCN1CCNC(=O)C2=CC=C(C=C2)F)C3=C4C(=CC=C3)O[C@H](CO4)CO	Active	Active	Non-active	Active	Active	Non-active
56032	CC1=C(C(=CC=C1)CC2=CN=CN2)C	Active	Active	Non-active	Non-active	Active	Non-active
54360	CN1CCCC(CC1)N2C(=O)C3=CC=CC=C3C(=N2)CC4=CC=C(C=C4)Cl	Active	Active	Non-active	Non-active	Active	Non-active
47795	C1CN(N=C1N)C2=CC=CC(=C2)C(F)(F)F	Active	Active	Non-active	Non-active	Active	Non-active
36431	C1CCC2(C1)CC(=O)N(C(=O)C2)CCCCN3CCN(CC3)C4=NC=CC=N4	Active	Active	Non-active	Non-active	Active	Non-active
31508	CC1=CC2=C(C=C1)C(=NC(=O)N2C(C)C)C3=CC=CC=C3	Active	Active	Non-active	Non-active	Active	Non-active
27812	CC[C@]12C=CC3=C4CCC(=O)C=C4CC[C@H]3[C@@H]1CC[C@]2(C#C)O	Active	Active	Non-active	Active	Active	Non-active
25249	C[C@]12CC[C@H]3[C@H]([C@@H]1CC[C@]2(C)O)CC[C@@H]4[C@@]3(CC5=C(C4)NN=C5)C	Active	Active	Non-active	Active	Active	Non-active
16741	C1=CC=C(C=C1)CCN=C=S	Active	Active	Non-active	Non-active	Active	Non-active
15805	COC1=CC2=C(C=C1)C(=C(CC2)C3=CC=CC=C3)C4=CC=C(C=C4)OCCN5CCCC5	Active	Active	Non-active	Active	Active	Non-active
9824	CC1=CC=C(C=C1)S(=O)(=O)NC(CC2=CC=CC=C2)C(=O)CCl	Active	Active	Non-active	Non-active	Active	Non-active
9051	CC(=O)[C@H]1CC[C@@H]2[C@@]1(CC[C@@H]3[C@H]2C=CC4=CC(=O)CC[C@@]34C)C	Active	Active	Non-active	Active	Active	Non-active
7090	C1CN(NC1=O)C2=CC=CC=C2	Active	Active	Non-active	Non-active	Active	Non-active
6291	C[C@]12CC[C@H]3[C@H]([C@@H]1CC[C@]2(C#C)O)CCC4=C3C=CC(=C4)OC	Active	Active	Non-active	Active	Active	Non-active
6025	C1=CC=C(C=C1)C=C(C2=CC=CC=C2)C3=CC=CC=C3	Active	Active	Non-active	Non-active	Active	Non-active
5991	C[C@]12CC[C@H]3[C@H]([C@@H]1CC[C@]2(C#C)O)CCC4=C3C=CC(=C4)O	Active	Active	Non-active	Active	Active	Non-active
5878	C[C@]12CC[C@H]3[C@H]([C@@H]1CC[C@]2(C)O)CC[C@@H]4[C@@]3(COC(=O)C4)C	Active	Active	Non-active	Active	Active	Non-active
5870	C[C@]12CC[C@H]3[C@H]([C@@H]1CCC2=O)CCC4=C3C=CC(=C4)O	Active	Active	Non-active	Active	Active	Non-active
5487	C1CN=C(N1)NC2=C(C=CC3=NSN=C32)Cl	Active	Active	Non-active	Non-active	Active	Non-active
5396	COC1=CC(=CC(=C1O)OC)C2C3C(COC3=O)C(C4=CC5=C(C=C24)OCO5)OC6C(C(C7C(O6)COC(O7)C8=CC=CS8)O)O	Active	Active	Non-active	Active	Active	Non-active
5092	COC1=C(C=C(C=C1)C2CC(=O)NC2)OC3CCCC3	Active	Active	Non-active	Active	Active	Non-active
4784	C1=CC=C(C=C1)CS(=O)(=O)F	Active	Active	Non-active	Non-active	Active	Non-active
4539	CCN1C=C(C(=O)C2=CC(=C(C=C21)N3CCNCC3)F)C(=O)O	Active	Active	Non-active	Active	Active	Non-active
4534	CC(CC1=CC(=C(C=C1)O)O)C(C)CC2=CC(=C(C=C2)O)O	Active	Active	Non-active	Active	Active	Non-active
3657	C(=O)(N)NO	Active	Active	Non-active	Active	Active	Non-active
3442	CCCCC1=CN=C(C=C1)C(=O)O	Active	Active	Non-active	Non-active	Active	Non-active
3357	CN1CCN(CC1)C2=C(C=C3C(=C2F)N(C=C(C3=O)C(=O)O)CCF)F	Active	Active	Non-active	Active	Active	Non-active
3165	C1=C2C(=CC(=C1Cl)Cl)N(C=N2)C3C(C(C(O3)CO)O)O	Active	Active	Non-active	Active	Active	Non-active
2803	C1CN=C(N1)NC2=C(C=CC=C2Cl)Cl	Active	Active	Non-active	Non-active	Active	Non-active
2519	CN1C=NC2=C1C(=O)N(C(=O)N2C)C	Active	Active	Non-active	Non-active	Active	Non-active
2019	CC1C(C(=O)NC(C(=O)N2CCCC2C(=O)N(CC(=O)N(C(C(=O)O1)C(C)C)C)C)C(C)C)NC(=O)C3=C4C(=C(C=C3)C)OC5=C(C(=O)C(=C(C5=N4)C(=O)NC6C(OC(=O)C(N(C(=O)CN(C(=O)C7CCCN7C(=O)C(NC6=O)C(C)C)C)C)C(C)C)C)N)C	Active	Active	Active	Active	Non-active	Active
1893	C1=CC2=C(C(=C1)[N+](=O)[O-])NN=C2	Active	Active	Non-active	Non-active	Active	Non-active
1662	CC(CC(=O)O)(CC(=O)O)O	Active	Active	Non-active	Non-active	Active	Non-active
932	C1C(OC2=CC(=CC(=C2C1=O)O)O)C3=CC=C(C=C3)O	Active	Active	Non-active	Active	Active	Non-active
667476	C/C=C(/C(=C/C)/C1=CC=C(C=C1)O)\C2=CC=C(C=C2)O	Active	Active	Non-active	Non-active	Active	Non-active
657301	CC(C)(C)NCC(C1=CC(=CC(=C1)O)O)O	Active	Active	Non-active	Non-active	Active	Non-active
656629	C1C[C@H](N2[C@H](C1)SCC[C@@H](C2=O)NC(=O)[C@H](CC3=CC=CC=C3)S)C(=O)O	Active	Active	Non-active	Active	Active	Non-active
656615	C[C@]12CCC(=O)C=C1C=C[C@@H]3[C@@H]2CC[C@]4([C@H]3CC[C@]4(CCC(=O)O)O)C	Active	Active	Non-active	Active	Active	Non-active
656406	CCOC(=O)C1=C(NC(=C(C1C2=CC=CC=C2C(F)(F)F)C(=O)OCCNC(=O)C3=CC=C(C=C3)N=[N+]=[N-])C)C	Active	Active	Non-active	Active	Non-active	Non-active
644345	CC(C)[C@@H](C(=O)N[C@@H](CC(=O)O)C=O)NC(=O)[C@H](CCC(=O)O)NC(=O)[C@H](CC(=O)O)NC(=O)C	Active	Active	Non-active	Active	Active	Non-active
638278	C1=CC(=CC=C1/C=C/C(=O)C2=C(C=C(C=C2)O)O)O	Active	Active	Non-active	Active	Active	Non-active
638034	CC1=C(C(CCC1)(C)C)/C=C/C(=C/C=C/C(=C/COC(=O)C)/C)/C	Active	Active	Non-active	Non-active	Active	Non-active
634470	CC1CC2=CC3=C(C(=C2C4=C(C(=C(C=C4CC1(C)O)OC)OC)OC)OC)OCO3	Active	Active	Non-active	Active	Active	Non-active
624713	CC12CCC3C(C1CCC2=O)C=CC4=CC(=O)C=CC34C	Active	Active	Non-active	Active	Active	Non-active
517204	CN(C)C1=CC2=C(C=C1)C=C3C=CC(=CC3=N2)N(C)C	Active	Active	Non-active	Non-active	Active	Non-active
494348	C1=NC2=C(C(=N1)N)N=CN2[C@@H]3[C@H]([C@H]([C@@H](O3)COP(=O)(CP(=O)(O)O)O)O)O	Active	Active	Non-active	Active	Non-active	Non-active
490561	C[C@]12[C@@](C[C@H](O1)N3C4=CC=CC=C4C5=C6C(=C7C8=CC=CC=C8N2C7=C53)CNC6=O)(C(=O)OC)O	Active	Active	Non-active	Active	Active	Non-active
480764	CC(=CCC1=C(C=C(C2=C1O[C@@H](CC2=O)C3=CC=C(C=C3)O)O)O)C	Active	Active	Non-active	Active	Active	Non-active
457964	C[C@]12CC[C@H]([C@@]([C@@H]1CC[C@@H]3[C@@]24CC[C@@]([C@H](C3)C4)(CO)O)(C)CO)O	Active	Active	Active	Active	Non-active	Active
456557	C[C@H]([C@@H](C1=NC=C(C=C1)O)O)[C@@H](C(=O)N[C@@H]([C@@H]2[C@H]([C@H]([C@@H](O2)N3C=CC(=O)NC3=O)O)O)C(=O)O)N	Active	Active	Non-active	Active	Active	Active
456201	CC(=O)N1CCN(CC1)C2=CC=C(C=C2)OC[C@H]3CO[C@](O3)(CN4C=CN=C4)C5=C(C=C(C=C5)Cl)Cl	Active	Active	Non-active	Active	Active	Non-active
454202	CCCCCCOC(=O)[C@@]1(C[C@H]2N3C4=CC=CC=C4C5=C6C(=C7C8=CC=CC=C8N(C7=C53)[C@@]1(O2)C)CNC6=O)O	Active	Active	Non-active	Active	Active	Non-active
451668	C1[C@@H]([C@H](O[C@H]1N2C=NC(=NC2=O)N)CO)O	Active	Active	Non-active	Active	Active	Non-active
450503	C([C@@H]1[C@H]([C@@H]([C@H]([C@H](O1)O)[18F])O)O)O	Active	Active	Non-active	Non-active	Non-active	Non-active
448537	CC/C(=C(/CC)\C1=CC=C(C=C1)O)/C2=CC=C(C=C2)O	Active	Active	Non-active	Active	Active	Non-active
448042	C[C@H](C1CCC(CC1)C(=O)NC2=CC=NC=C2)N	Active	Active	Non-active	Non-active	Active	Non-active
446598	CCC[C@@H]1C[C@H](N(C1)C)C(=O)N[C@@H]([C@@H]2[C@@H]([C@@H]([C@H]([C@H](O2)SC)O)O)O)[C@H](C)Cl	Active	Active	Non-active	Active	Active	Non-active
446596	C[C@H]([C@H]1[C@@H](O1)C[C@H]2CO[C@H]([C@@H]([C@@H]2O)O)C/C(=C/C(=O)OCCCCCCCCC(=O)O)/C)[C@H](C)O	Active	Active	Active	Active	Non-active	Non-active
446541	CC1=C(C(=C(C2=C1COC2=O)O)C/C=C(\C)/CCC(=O)O)OC	Active	Active	Active	Active	Non-active	Non-active
446512	C[C@@H]1CC[C@]2(CCCCO2)O[C@@H]1[C@@H](C)C[C@@H]([C@@H]3C(=C)[C@H]([C@H]4[C@H](O3)CC[C@]5(O4)CC[C@@H](O5)/C=C/[C@@H](C)[C@@H]6CC(=C[C@@]7(O6)[C@@H](CC[C@H](O7)C[C@](C)(C(=O)O)O)O)C)O)O	Active	Active	Non-active	Active	Non-active	Active
446157	CC(C)C1=NC(=NC(=C1/C=C/[C@H](C[C@H](CC(=O)O)O)O)C2=CC=C(C=C2)F)N(C)S(=O)(=O)C	Active	Active	Non-active	Active	Active	Non-active
446156	CC(C)C1=C(C(=C(C(=N1)C(C)C)/C=C/[C@H](C[C@H](CC(=O)O)O)O)C2=CC=C(C=C2)F)COC	Active	Active	Non-active	Active	Active	Non-active
445434	C[C@H]1[C@@H](NC(=O)[C@@H](NC(=O)[C@H]([C@@H](NC(=O)[C@@H](NC(=O)[C@H](NC(=O)C(=C)N(C(=O)CC[C@@H](NC1=O)C(=O)O)C)C)CC(C)C)C(=O)O)C)CCCN=C(N)N)/C=C/C(=C/[C@H](C)[C@H](CC2=CC=CC=C2)OC)/C	Active	Active	Non-active	Active	Non-active	Active
445421	C[C@@H]1[C@H]([C@@H]([C@H]([C@H](O1)O[C@@H]2[C@H](O[C@@H]([C@@H]([C@H]2O)O)O[C@@H]3[C@H](O[C@@H]([C@@H]([C@H]3O)O)O)CO)CO)O)O)N[C@H]4C=C([C@H]([C@@H]([C@H]4O)O)O)CO	Active	Active	Non-active	Active	Active	Non-active
444266	C(=C\C(=O)O)\C(=O)O	Active	Active	Non-active	Non-active	Active	Non-active
443955	CC[C@@]12CCCN3[C@@H]1C4=C(CC3)C5=CC=CC=C5N4C(=C2)C(=O)OCC	Active	Active	Non-active	Active	Active	Non-active
443872	C[C@]12CCC(=O)C=C1C[C@H]([C@@H]3[C@]24[C@H](O4)C[C@]5([C@H]3CC[C@@]56CCC(=O)O6)C)C(=O)OC	Active	Active	Non-active	Non-active	Non-active	Non-active
443592	CC(C)CCCCCCCCC[C@@H]1CC(=O)N[C@H](C(=O)N[C@H](C(=O)N[C@@H](C(=O)N[C@H](C(=O)N[C@H](C(=O)N[C@@H](C(=O)N[C@H](C(=O)O1)CC(C)C)CC(C)C)CC(=O)O)C(C)C)CC(C)C)CC(C)C)CCC(=O)O	Active	Active	Non-active	Active	Non-active	Active
443380	COCCOC[C@H](CC1(CCCC1)C(=O)NC2CCC(CC2)C(=O)O)C(=O)O	Active	Active	Non-active	Active	Non-active	Non-active
443119	CC(C)C[C@@H](C(=O)N[C@@H](CC1=CC=CC=C1)C=O)NC(=O)[C@H](C2CCN=C(N2)N)NC(=O)N[C@@H](CC3=CC=CC=C3)C(=O)O	Active	Active	Non-active	Active	Active	Non-active
443099	CC(CO)(C([C@@]12C(=O)N[C@@](C(=C)CCO1)(C(=O)N2)O)O)O	Active	Active	Non-active	Active	Active	Non-active
442021	COC1=C(C=C2C(=C1)[C@]34CCN5[C@H]3C[C@@H]6[C@@H]7[C@@H]4N2C(=O)C[C@@H]7OCC=C6C5)OC	Active	Active	Non-active	Active	Active	Non-active
441401	CC(=O)NC[C@H]1CN(C(=O)O1)C2=CC(=C(C=C2)N3CCOCC3)F	Active	Active	Non-active	Active	Active	Non-active
441374	C1[C@H]([C@@H]([C@H]([C@@H]([C@H]1N)O[C@@H]2[C@@H]([C@H]([C@@H]([C@H](O2)CN)O)O)O)O)O[C@@H]3[C@@H]([C@H]([C@@H]([C@H](O3)CO)O)N)O)N	Active	Active	Active	Active	Non-active	Active
441350	C[C@](CC1=CC=C(C=C1)O)(C(=O)O)N	Active	Active	Non-active	Non-active	Active	Non-active
441325	CCCCC1=C(C2=CC=CC=C2O1)C(=O)C3=CC(=C(C(=C3)I)OCCN(CC)CC)I	Active	Active	Non-active	Active	Active	Non-active
441306	CCN[C@@H]1C[C@@H]([C@H]([C@@H]([C@H]1O[C@@H]2[C@@H]([C@H]([C@@](CO2)(C)O)NC)O)O)O[C@@H]3[C@@H](CC=C(O3)CN)N)N	Active	Active	Active	Active	Non-active	Active
441301	C[C@]12CC[C@H](C[C@@H]1CC[C@@H]3[C@@H]2CC[C@]4([C@H]3CCC4O)C)O	Active	Active	Non-active	Active	Active	Non-active
441207	C[C@@H]1[C@H]([C@H](C[C@@H](O1)O[C@@H]2[C@H](O[C@H](C[C@@H]2O)O[C@@H]3[C@H](O[C@H](C[C@@H]3O)O[C@H]4CC[C@]5([C@@H](C4)CC[C@@H]6[C@@H]5CC[C@]7([C@@]6(CC[C@@H]7C8=CC(=O)OC8)O)C)C)C)C)O)O	Active	Active	Non-active	Active	Active	Non-active
440646	C[C@@H]1CC[C@@]2(CC[C@@H]([C@@H](O2)[C@H](C)CC[C@@H]([C@H](C)C(=O)C[C@H]([C@H]([C@@H](C(C)C)OC(=O)C[C@H](C3=C(C(=O)OC3=O)C)O)OC)O)O)C)O[C@H]1CC[C@H](C)C(=O)C	Active	Active	Non-active	Active	Non-active	Active
440317	C1=NC2=C(C(=N1)N)N=CN2[C@H]3[C@@H]([C@@H]([C@H](O3)COP(=O)(O)OP(=O)(O)OP(=S)(O)O)O)O	Active	Active	Non-active	Active	Active	Non-active
440005	C(C[C@@H](C(=O)O)N)CN=C(N)N[N+](=O)[O-]	Active	Active	Non-active	Active	Active	Non-active
439530	CN(C)C1=NC=NC2=C1N=CN2[C@H]3[C@@H]([C@@H]([C@H](O3)CO)NC(=O)[C@H](CC4=CC=C(C=C4)OC)N)O	Active	Active	Non-active	Active	Active	Non-active
439518	CC(C)C[C@H]([C@@H](C(=O)N[C@@H](C(C)C)C(=O)N[C@@H](C(C)C)C(=O)N[C@@H](CC(=O)O)C(=O)O)O)N	Active	Active	Non-active	Active	Active	Non-active
439501	C[C@H]1[C@@H]([C@H]([C@H]([C@@H](O1)O[C@H]2C[C@H]([C@@]3([C@@H]4[C@@H](CC[C@@]3(C2)O)[C@]5(CC[C@@H]([C@]5(C[C@H]4O)C)C6=CC(=O)OC6)O)CO)O)O)O)O	Active	Active	Non-active	Active	Active	Non-active
439487	CC(C)C[C@@H](C(=O)NCCCCN=C(N)N)NC(=O)[C@H]1[C@@H](O1)C(=O)O	Active	Active	Non-active	Active	Non-active	Non-active
439176	CSC[C@@H]1[C@H]([C@H]([C@@H](O1)N2C=NC3=C2N=CN=C3N)O)O	Active	Active	Non-active	Active	Active	Non-active
433580	CC(C(=O)O)OC1C(C(OC(C1O)CO)O)N	Active	Active	Non-active	Non-active	Non-active	Non-active
395803	C1C[C@@H]2C(=O)N[C@H](C(=O)N[C@H](C(=O)N[C@H](C(=O)N2C1)CC3=CC=CC=C3)CC4=CC=CC=C4)CCCCCC(=O)[C@@H]5CO5	Active	Active	Non-active	Active	Active	Non-active
394493	C1=CC(=CC=C1CCC2=CNC3=C2C(=O)N=C(N3)N)C(=O)NC(CCC(=O)O)C(=O)O	Active	Active	Non-active	Active	Active	Non-active
393035	CCOC(=O)[C@@H]1[C@H](O1)C(=O)NC(CC(C)C)C(=O)NCCC(C)C	Active	Active	Non-active	Non-active	Active	Non-active
390986	CC(=O)OCOC(=O)CN(CC1=C(C=C2C(=C1)C3(C4=CC=CC=C4C(=O)O3)C5=CC(=C(C=C5O2)OC(=O)C)CN(CC(=O)OCOC(=O)C)CC(=O)OCOC(=O)C)OC(=O)C)CC(=O)OCOC(=O)C	Active	Active	Non-active	Active	Non-active	Active
366046	CCCN(CCCN)N(N=O)O	Active	Active	Non-active	Non-active	Active	Non-active
356987	C1C[C@H]([C@@H]2C(C(CN2C1)O)O)O	Active	Active	Non-active	Non-active	Active	Non-active
353481	CC(C(C1=NC=C(C=C1)O)O)C(C(=O)NC(C2C(C(C(O2)N3C=CC(=O)NC3=O)O)O)C(=O)O)N	Active	Active	Non-active	Active	Active	Active
337960	C1=C(N=C(S1)C2C(C(C(O2)COP(=O)(O)OP(=O)(O)OCC3C(C(C(O3)N4C=NC5=C4N=CN=C5N)O)O)O)O)C(=O)N	Active	Active	Non-active	Active	Non-active	Active
325003	C1=CC(=C(C=C1C(CNCCCCCCNCC(C2=CC(=C(C=C2)O)O)O)O)O)O	Active	Active	Non-active	Active	Active	Non-active
319260	CC12CCC(=O)C=C1C=CC3C2CCC4(C3CCC45CCC(=O)O5)C	Active	Active	Non-active	Active	Active	Non-active
294641	C1[C@H](ON=C1Cl)[C@@H](C(=O)O)N	Active	Active	Active	Non-active	Non-active	Non-active
293208	C1CCC2=C(OC(=C2C1)C3=CC=CC=C3)C4=CC=CC=C4	Active	Active	Non-active	Non-active	Active	Non-active
289840	CC1C(C(C(C(O1)O[C@H]2C[C@H]([C@@]3([C@@H]4[C@@H](CC[C@@]3(C2)O)[C@]5(CC[C@@H]([C@]5(C[C@H]4O)C)C6=CC(=O)OC6)O)CO)O)O)O)O	Active	Active	Non-active	Active	Active	Non-active
273032	CN1CCC23C4C1CC5=C2C(=C(C=C5)O)OC3C(CC4)O	Active	Active	Non-active	Active	Active	Non-active
260127	CN1CCC23CCCCC2C1CC4=C3C=C(C=C4)O	Active	Active	Non-active	Active	Active	Non-active
254765	CC(=O)[C@]1(CC[C@@H]2[C@@]1(C[C@@H]([C@]3([C@H]2CCC4=CC(=O)CC[C@@]43C)F)O)C)O	Active	Active	Non-active	Non-active	Active	Non-active
249866	CC(C1CCC2C1(CCC3C2CCC4=CC(=O)CCC34C)C)O	Active	Active	Non-active	Active	Active	Non-active
242332	C[C@]12CC[C@@H](C[C@@H]1CC[C@@H]3[C@@H]2CC[C@]4([C@H]3CC[C@@H]4O)C)O	Active	Active	Non-active	Active	Active	Non-active
235227	CCNC1=C(C=C2C(=C1)OC3=CC(=NCC)C(=CC3=C2C4=CC=CC=C4C(=O)OCC)C)C	Active	Active	Non-active	Active	Active	Non-active
229455	C[C@]12CC[C@H]3[C@H]([C@@H]1CC[C@@H]2OC(=O)CCC4=CC=CC=C4)CCC5=CC(=O)CC[C@H]35	Active	Active	Non-active	Active	Active	Non-active
222154	CC1C(C(C(C(O1)O[C@H]2CC[C@@]3([C@H]4CC[C@@]5([C@H](CC[C@@]5([C@@H]4CCC3=C2)O)C6=COC(=O)C=C6)C)C)O)O)O	Active	Active	Non-active	Active	Active	Non-active
220861	CC1C(C(CC(O1)OC2CCC3(C4CCC5(C(CCC5(C4CCC3(C2)O)O)C6=CC(=O)OC6)C)C=O)OC)OC7C(C(C(C(O7)CO)O)O)O	Active	Active	Non-active	Active	Active	Non-active
220502	CC(=O)C1CCC2C1(CC(C3C2CCC4=CC(=O)CCC34C)O)C	Active	Active	Non-active	Active	Active	Non-active
219024	CNC(=O)C1=CN(N=C1)C2=NC3=C(C(=N2)N)N=CN3[C@H]4[C@@H]([C@@H]([C@H](O4)CO)O)O	Active	Active	Non-active	Active	Non-active	Active
204163	CCC(=O)O[C@]1(CCN(C[C@H]1C)C)C2=CC=CC=C2	Active	Active	Non-active	Non-active	Active	Non-active
200213	CCSC(=N)N	Active	Active	Non-active	Non-active	Active	Non-active
198127	CCOC(=O)NC1=C(N=C(C=C1)NCC2=CC=C(C=C2)F)N	Active	Active	Non-active	Non-active	Active	Non-active
189546	CC1COC2=C3N1C=C(C(=O)C3=CC(=C2N4CCN(CC4)C)F)C(=O)O	Active	Active	Non-active	Active	Active	Non-active
176408	C1=CC=C(C=C1)CCN2C3=C(C=N2)C4=NC(=NN4C(=N3)N)C5=CC=CO5	Active	Active	Non-active	Active	Active	Non-active
175775	C1CC2=C(CC1CN3C=CN=C3)C=CC(=C2)C(=O)O	Active	Active	Non-active	Non-active	Active	Non-active
170012	CN(CC[C@@H](CC(=O)N[C@H]1C=C[C@@H](O[C@@H]1C(=O)O)N2C=CC(=NC2=O)N)N)C(=N)N	Active	Active	Non-active	Active	Active	Non-active
168993	CN1CCC(=C2C3=C(CCC4=CC=CC=C42)SC=C3)CC1	Active	Active	Non-active	Non-active	Active	Non-active
167628	C(CSSCCN)N	Active	Active	Non-active	Non-active	Active	Non-active
164652	CCNCC(C1=CC(=CC=C1)O)O	Active	Active	Non-active	Non-active	Active	Non-active
158782	C[C@H]([C@H]1C(=O)N[C@@H](CSSC[C@@H](C(=O)N[C@H](C(=O)N[C@@H](C(=O)N[C@H](C(=O)N1)CCCCN)CC2=CNC3=CC=CC=C32)CC4=CC=C(C=C4)O)NC(=O)[C@@H](CC5=CC=CC=C5)NC(=O)CN6CCN(CCN(CCN(CC6)CC(=O)O)CC(=O)O)CC(=O)O)C(=O)N[C@H](CO)[C@@H](C)O)O	Active	Active	Non-active	Active	Non-active	Active
157348	CC1=CC=CC2=C(C3=C(C(=CC=C3)C(=O)NC)N=C12)NC4=C(C=C(C=C4)NS(=O)(=O)C)OC	Active	Active	Non-active	Active	Active	Non-active
155774	C1COCCN1C(=O)NCCNCC(COC2=CC=C(C=C2)O)O	Active	Active	Non-active	Non-active	Active	Non-active
154575	COC1=C(C=C(C=C1)C(=O)NC2=C(C=NC=C2Cl)Cl)OC3CCCC3	Active	Active	Non-active	Active	Active	Non-active
151170	COC1=C(C=C(C=C1)C2(CCC(CC2)C(=O)O)C#N)OC3CCCC3	Active	Active	Non-active	Active	Active	Non-active
151115	CC[C@@]1(C2=C(COC1=O)C(=O)N3CC4=C5[C@H](CCC6=C5C(=CC(=C6C)F)N=C4C3=C2)N)O	Active	Active	Non-active	Active	Non-active	Non-active
149793	CCCCCC[C@@H]([C@H](C)O)N1C=NC2=C1N=CN=C2N	Active	Active	Non-active	Active	Active	Non-active
149096	C[C@H]1COC2=C3N1C=C(C(=O)C3=CC(=C2N4CCN(CC4)C)F)C(=O)O	Active	Active	Non-active	Active	Active	Non-active
137994	CC1(CC(CC(N1[O])(C)C)O)C	Active	Active	Non-active	Non-active	Active	Non-active
135260	CC[C@@H](C(C[C@H](C)NC)(C1=CC=CC=C1)C2=CC=CC=C2)OC(=O)C	Active	Active	Non-active	Active	Active	Non-active
134019	C1=CC(=C2C(=C1NCCN)C(=O)C3=C(C2=O)C=NC=C3)NCCN	Active	Active	Non-active	Active	Active	Non-active
131601	CCOP(=O)(CC1=CC=C(C=C1)C(=O)NC2=C(C=C(C=C2)Br)C#N)OCC	Active	Active	Non-active	Non-active	Active	Non-active
130606	CC1=CC=C(C=C1)S(=O)(=O)NC2=C3C(=CC(=C2)OC)C=CC=N3	Active	Active	Non-active	Non-active	Active	Non-active
130313	CC1([C@@H](N2[C@H](S1(=O)=O)CC2=O)C(=O)O)C	Active	Active	Active	Non-active	Non-active	Active
125017	CN(C)CC(C1=CC=C(C=C1)O)C2(CCCCC2)O	Active	Active	Non-active	Non-active	Active	Non-active
124007	C1CNCC=C1C2=CNC3=C2NC(=O)C=C3	Active	Active	Non-active	Non-active	Active	Non-active
123982	C[C@@H](C(=O)O)NC(=O)[C@H](CC1=CC=CC=C1)CC(=O)NO	Active	Active	Non-active	Non-active	Active	Non-active
123978	C[C@H]([C@H]1C(=O)NCC[C@@H](C(=O)N[C@H](C(=O)N[C@@H](C(=O)N[C@H](C(=O)N[C@H](C(=O)N[C@H](C(=O)N1)CCN)CCN)CC(C)C)CC2=CC=CC=C2)CCN)NC(=O)[C@H](CCN)NC(=O)[C@H]([C@@H](C)O)N)O	Active	Active	Non-active	Active	Non-active	Active
123917	C1C(C(C(=O)O1)CC2=CC(=CC=C2)O)CC3=CC(=CC=C3)O	Active	Active	Non-active	Active	Active	Non-active
123862	CC(C1CCC(CC1)C(=O)NC2=CC=NC=C2)N	Active	Active	Non-active	Non-active	Active	Non-active
123823	CCOC(=O)C1(CO1)CCCCCCOC2=CC=C(C=C2)Cl	Active	Active	Non-active	Non-active	Active	Non-active
123808	C1=CC=C(C=C1)NC2=C3C(=C(C=C2)C4=C5C=CC=C(C5=C(C=C4)NC6=CC=CC=C6)S(=O)(=O)O)C=CC=C3S(=O)(=O)O	Active	Active	Non-active	Active	Active	Non-active
123742	C1=CC=C(C=C1)CC(CS)C(=O)NCCC(=O)O	Active	Active	Non-active	Non-active	Active	Non-active
123723	C1CCC(C1)[C@H](C2=CC=C(C=C2)OCC3=NC4=CC=CC=C4C=C3)C(=O)O	Active	Active	Non-active	Active	Active	Non-active
123663	C1CC(=O)N(C1=O)OC(=O)CCC(=O)OCCOC(=O)CCC(=O)ON2C(=O)CCC2=O	Active	Active	Non-active	Active	Non-active	Non-active
123630	C[C@@]1([C@@H](N2[C@H](S1(=O)=O)CC2=O)C(=O)O)CN3C=CN=N3	Active	Active	Non-active	Active	Non-active	Active
123606	CN(C)CCC1=CNC2=C1C=C(C=C2)CS(=O)(=O)N3CCCC3	Active	Active	Non-active	Active	Active	Non-active
123600	CC(C)(C)NC[C@@H](C1=CC(=C(C=C1)O)CO)O	Active	Active	Non-active	Non-active	Active	Non-active
122282	CN1C2C(N(C1=O)C)N(C(=O)N2C)C	Active	Active	Non-active	Non-active	Non-active	Non-active
122261	CN(C)C1=CC=CC2=C1C=CC=C2S(=O)(=O)N[C@@H](CCC(=O)O)C(=O)NCC(=O)N[C@@H](CCCN=C(N)N)C(=O)CCl	Active	Active	Non-active	Active	Active	Non-active
122222	C1=CC=C(C=C1)C[C@@H](C(=O)N[C@@H](CCCCN)C(=O)N)NC(=O)[C@@H](CCCN=C(N)N)NC(=O)[C@H](CC2=CC=C(C=C2)O)N	Active	Active	Non-active	Active	Active	Non-active
122153	C1CC(=O)N(C1=O)OC(=O)C2=CC=C(C=C2)N=[N+]=[N-]	Active	Active	Non-active	Non-active	Active	Non-active
122000	CCC1=CC=CC=C1C2=NC(=NN2)C3=CC(=CC=C3)OC	Active	Active	Non-active	Non-active	Active	Non-active
121963	CC(=O)OCC1=C(N2[C@@H]([C@H](C2=O)OC)S(=O)(=O)C1)C(=O)N3CCC[C@H]3C(=O)O	Active	Active	Non-active	Active	Non-active	Active
121930	C1CN(CCN1CCC2=CC=C(C=C2)N)C3=CC=CC(=C3)C(F)(F)F	Active	Active	Non-active	Active	Active	Non-active
121876	CC(C1=CC=C(C=C1)OCC2=CC=CC=C2)N(C(=O)C)O	Active	Active	Non-active	Non-active	Active	Non-active
121855	CC(C)C[C@@H](C(=O)N[C@@H](CC(C)C)C(=O)N[C@@H](CCSC)C=O)NC(=O)C	Active	Active	Non-active	Active	Active	Non-active
120639	C1=CC=C(C=C1)C(C#N)O[C@H]2[C@@H]([C@H]([C@@H]([C@H](O2)CO)O)O)O	Active	Active	Non-active	Active	Active	Non-active
119553	CC1=C(N(C2=CC=CC=C12)CCCCCCCC(=O)O)C3=CN=CC=C3	Active	Active	Non-active	Active	Active	Non-active
119525	CCN1C=C(C(=O)C2=CC(=C(C=C21)N3CCN(CC3)C)F)C(=O)O	Active	Active	Non-active	Active	Active	Non-active
119360	C=C1[C@@H](O[C@@H](C1O)CO)N2C=CC(=NC2=O)N	Active	Active	Non-active	Non-active	Active	Non-active
119349	CC(C)C1=CN2C=CC=CC2=C1S(=O)(=O)C3=CC=C(C=C3)OCCCN(C)CCC4=CC(=C(C=C4)OC)OC	Active	Active	Non-active	Active	Active	Non-active
119339	CC(=O)N[C@@H]1[C@@H]([C@@H]([C@H](O[C@H]1O[C@@H]2[C@H](O[C@H]([C@@H]([C@@H]2O)NC(=O)C)O[C@@H]3[C@H]([C@H]4[C@@H]([C@H]3O)N=C(O4)N(C)C)CO)CO)CO)O)O	Active	Active	Non-active	Active	Non-active	Active
119305	CC(=O)[C@H]1C2=C(C(=C3C(=O)C=C(C4=C5C(=CC(=O)C6=C(C(=C(C[C@@]1(C)O)C(=C56)C2=C43)OC)O)OC)OC)O)OC	Active	Active	Non-active	Active	Non-active	Active
119198	C[C@@]12CCN([C@@H]1N(C3=C2C=C(C=C3)O)C)C	Active	Active	Non-active	Non-active	Active	Non-active
119081	C[C@H]([C@H](C)N1CC(=O)NC(=O)C1)N2CC(=O)NC(=O)C2	Active	Active	Non-active	Active	Active	Non-active
119033	C1=CC=C(C=C1)[C@H](C#N)O[C@H]2[C@@H]([C@H]([C@@H]([C@H](O2)CO)O)O)O	Active	Active	Non-active	Active	Active	Non-active
119032	CC(=O)OC1=CC=CC=C1C(=O)OC2=CC=CC(=C2)CO[N+](=O)[O-]	Active	Active	Non-active	Non-active	Active	Non-active
115355	C1CC(=O)C(C(=O)C1)C(=O)C2=C(C=C(C=C2)C(F)(F)F)[N+](=O)[O-]	Active	Active	Non-active	Active	Active	Non-active
115292	CC(CN)C1=CNC2=C1C=C(C=C2)O	Active	Active	Non-active	Non-active	Active	Non-active
115227	CC1=C(C=C(C(=O)N1)C#N)C2=CN3C=CN=C3C=C2	Active	Active	Non-active	Non-active	Active	Non-active
115150	CC(C(C)N1CC(=O)NC(=O)C1)N2CC(=O)NC(=O)C2	Active	Active	Non-active	Active	Active	Non-active
115089	C1=CC(=CC(=C1)O)C[C@@H](CO)[C@@H](CC2=CC(=CC=C2)O)CO	Active	Active	Non-active	Active	Active	Non-active
115071	CCCCCCC1C(C(=O)N(C(C(=O)NC(C(=O)NC(C(=O)NC(C(=O)NCC(=O)O1)C(C)O)CO)C(C)CC)CC(C)C)C)C	Active	Active	Active	Active	Non-active	Active
114683	C1=CNC2=CC(=C(C=C21)O)O	Active	Active	Non-active	Non-active	Active	Non-active
110635	CN1CC(=O)N2[C@@H](C1=O)CC3=C([C@H]2C4=CC5=C(C=C4)OCO5)NC6=CC=CC=C36	Active	Active	Non-active	Active	Active	Non-active
108213	COC1=C2C(=C(C(=C1)C(=O)OC)C3=C4C(=C(C=C3C(=O)OC)OC)OCO4)OCO2	Active	Active	Non-active	Active	Active	Active
108189	CC1=C(C2=C(C=C1)NC(=NC2=O)N)SC3=CC=NC=C3	Active	Active	Non-active	Active	Active	Non-active
108082	CCN(CC)CC(=O)OC1=CC=C(C=C1)NC(=O)C	Active	Active	Non-active	Non-active	Active	Non-active
108047	C1CNCCN(C1)S(=O)(=O)C2=CC=CC3=C2C=CC=C3Cl	Active	Active	Non-active	Non-active	Active	Non-active
108028	COC1=CC2=C(C=C1)NC=C2C3=CCNCC3	Active	Active	Non-active	Non-active	Active	Non-active
108018	C(CS(=O)(=O)O)NCl	Active	Active	Non-active	Non-active	Active	Non-active
107984	CC(=NCCC[C@@H](C(=O)O)N)N	Active	Active	Non-active	Active	Active	Non-active
107971	C1=CC(=CC=C1C2=COC3=C(C2=O)C=CC(=C3)O[C@H]4[C@@H]([C@H]([C@@H]([C@H](O4)CO)O)O)O)O	Active	Active	Non-active	Active	Active	Non-active
107905	C1[C@H]([C@H](OC2=CC(=CC(=C21)O)O)C3=CC(=C(C=C3)O)O)OC(=O)C4=CC(=C(C(=C4)O)O)O	Active	Active	Non-active	Active	Active	Non-active
107847	C[C@H]([C@@H](C(=O)O)NC(=O)[C@H](CC(C)C)NC(=O)[C@H](CC1=CC=CC=C1)NC(=O)CNC(=O)[C@@H](CO)NC(=O)[C@H](CC2=CC=C(C=C2)O)N)O	Active	Active	Non-active	Active	Active	Non-active
107751	CC(=O)SCC(CC1=CC=CC=C1)C(=O)NCC(=O)OCC2=CC=CC=C2	Active	Active	Non-active	Non-active	Active	Non-active
107707	CC(C)C[C@@H](C=O)NC(=O)C(CC(C)C)NC(=O)C(CC(C)C)NC(=O)OCC1=CC=CC=C1	Active	Active	Non-active	Active	Active	Non-active
107697	CCC12CCN([C@@H](C1(C)C)CC3=C2C=C(C=C3)O)CC4(CC4)O	Active	Active	Non-active	Non-active	Active	Non-active
107686	COC1=CC=CC=C1CC(=N)N2C[C@H]3[C@@H](C2)C(CCC3=O)(C4=CC=CC=C4)C5=CC=CC=C5	Active	Active	Non-active	Active	Active	Non-active
105104	CN([C@H]1CC[C@@]2(CCCO2)C[C@@H]1N3CCCC3)C(=O)CC4=CC=CC=C4	Active	Active	Non-active	Active	Active	Non-active
104978	CC1=CC(=C(C=C1)N(CC(=O)O)CC(=O)O)OCCOC2=C(C=CC(=C2)C3=C4C=C(C(=O)C=C4OC5=CC(=C(C=C53)Cl)O)Cl)N(CC(=O)O)CC(=O)O	Active	Active	Non-active	Active	Active	Non-active
104858	C(CC(=O)N[C@@H](CSN=O)C(=O)NCC(=O)O)[C@@H](C(=O)O)N	Active	Active	Non-active	Active	Non-active	Non-active
104842	CCC1=C2C=C(C=CC2=NC3=C1CN4C3=CC5=C(C4=O)COC(=O)[C@@]5(CC)O)O	Active	Active	Non-active	Active	Active	Non-active
104787	CC1([C@H](C(=O)NCC(=O)N[C@H](C(=O)N[C@H](C(SS1)(C)C)C(=O)O)CC2=CC=CC=C2)NC(=O)[C@H](CC3=CC=C(C=C3)O)N)C	Active	Active	Non-active	Active	Non-active	Non-active
104762	C1=NC(=C(N1[C@H]2[C@@H]([C@@H]([C@H](O2)CO)O)O)O)C(=O)N	Active	Active	Non-active	Active	Active	Non-active
99558	C(CSC[C@@H](C(=O)O)N)N	Active	Active	Non-active	Non-active	Active	Non-active
98487	COC1=CC=CC(=C1)C(=O)N	Active	Active	Non-active	Non-active	Active	Non-active
97297	C1=C(C2=C(N1[C@H]3[C@@H]([C@@H]([C@H](O3)CO)O)O)N=CN=C2N)I	Active	Active	Non-active	Active	Active	Non-active
95575	C#CCC(C(=O)O)N	Active	Active	Non-active	Active	Active	Non-active
94442	CN(C)C1=CC=CC2=C1C=CC=C2S(=O)(=O)NN	Active	Active	Non-active	Non-active	Active	Non-active
93577	CC1=CC(=O)OC2=C1C=CC(=C2)O[C@H]3[C@@H]([C@H]([C@H]([C@H](O3)CO)O)O)O	Active	Active	Non-active	Active	Active	Non-active
92943	C[C@H](CN1CCOCC1)C(C2=CC=CC=C2)(C3=CC=CC=C3)C(=O)N4CCCC4	Active	Active	Non-active	Active	Active	Non-active
92411	CCCN1C2=C(C(=O)N(C1=O)CCC)NC(=N2)C3=C(C=C(C=C3)Cl)N	Active	Active	Non-active	Active	Active	Non-active
92143	C1=CC(=CC=C1C(C(=O)O)N)O	Active	Active	Non-active	Non-active	Active	Non-active
91649	CC(C)(C(=O)NC1=CC(=C(C=C1)[N+](=O)[O-])C(F)(F)F)O	Active	Active	Non-active	Non-active	Active	Non-active
91621	C1=CC2=C(C=CC=C2S(=O)(=O)O)C(=C1)NCCNC(=O)CI	Active	Active	Non-active	Active	Active	Non-active
91553	CC1=CC(=O)OC2=C1C=CC(=C2)O[C@H]3[C@@H]([C@H]([C@@H]([C@H](O3)C(=O)O)O)O)O	Active	Active	Non-active	Active	Active	Non-active
91474	C[C@H](CCCC(C)C)[C@H]1CC[C@@H]2[C@@]1(CC[C@H]3[C@H]2C(=O)C=C4[C@@]3(CC[C@@H](C4)O)C)C	Active	Active	Non-active	Active	Non-active	Non-active
91469	C1[C@H](COC2=C1C=CC(=C2)O)C3=CC=C(C=C3)O	Active	Active	Non-active	Active	Active	Non-active
91273	C1C[C@H]2C[C@@H]1[C@H]3[C@@H]2C(=O)N(C3=O)CCCCN4CCN(CC4)C5=NC=CC=N5	Active	Active	Non-active	Non-active	Active	Non-active
85875	CC1=CC(=C(C=C1OC)CC(C)N)OC	Active	Active	Non-active	Non-active	Active	Non-active
84003	C1CN2C(=CC=C2C(=O)C3=CC=CC=C3)C1C(=O)O	Active	Active	Non-active	Non-active	Active	Non-active
84000	C1=NC2=C(N1COCCOP(=O)(O)OP(=O)(O)OP(=O)(O)O)NC(=NC2=O)N	Active	Active	Non-active	Active	Active	Non-active
82146	CC1=CC2=C(C=C1C(=C)C3=CC=C(C=C3)C(=O)O)C(CCC2(C)C)(C)C	Active	Active	Non-active	Active	Active	Non-active
81695	C1=NC2=C(N1)C(=NC(=N2)N)N	Active	Active	Non-active	Non-active	Active	Non-active
78000	CCC(CC)O[C@@H]1C=C(C[C@@H]([C@H]1NC(=O)C)N)C(=O)OCC	Active	Active	Non-active	Non-active	Active	Non-active
77997	CN(C)CCC1=CNC2=C1C=C(C=C2)CN3C=NC=N3	Active	Active	Non-active	Non-active	Active	Non-active
77992	CN[C@@H]1CCC2=C(C1)C3=C(N2)C=CC(=C3)C(=O)N	Active	Active	Non-active	Active	Active	Non-active
76806	C1=CC2=C(C=C1C(=O)O)C3(C4=C(C=C(C=C4)O)OC5=C3C=CC(=C5)O)OC2=O	Active	Active	Non-active	Active	Active	Non-active
74989	C1CC(CCC1C2=CC=C(C=C2)Cl)C3=C(C4=CC=CC=C4C(=O)C3=O)O	Active	Active	Non-active	Active	Active	Non-active
73949	C1COC(=O)N1	Active	Active	Active	Non-active	Non-active	Non-active
73364	CCCC[C@@H](C=O)NC(=O)[C@H](CC(C)C)NC(=O)OCC1=CC=CC=C1	Active	Active	Non-active	Non-active	Active	Non-active
73041	CC1=C(C(=CC(=C1)C2(C3=CC=CC=C3S(=O)(=O)O2)C4=CC(=C(C(=C4)CN(CC(=O)O)CC(=O)O)O)C)CN(CC(=O)O)CC(=O)O)O	Active	Active	Non-active	Active	Active	Non-active
72828	C1=CN(C(=O)N=C1N)[C@@H]2C=C([C@H]([C@H]2O)O)CO	Active	Active	Non-active	Active	Active	Non-active
72501	C1[C@@H]([C@H]([C@H]([C@@H]1N2C=NC3=C2C=CN=C3N)O)O)CO	Active	Active	Non-active	Active	Non-active	Active
72430	CC(C)[C@@H](C(=O)N[C@@H](CC1=CC=CC=C1)C=O)NC(=O)OCC2=CC=CC=C2	Active	Active	Non-active	Non-active	Active	Non-active
72429	CC(C)C[C@@H](C(=O)N[C@@H](CC(C)C)C(=O)N[C@@H](CCCN=C(N)N)C=O)NC(=O)C	Active	Active	Non-active	Active	Active	Non-active
72258	C1[C@H]([C@H]([C@@H]([C@H](N1)CO)O)O)O	Active	Active	Non-active	Non-active	Active	Non-active
72124	CC1CC(=O)NN=C1C2=CC=C(C=C2)NC(=NC)NC#N	Active	Active	Non-active	Non-active	Active	Non-active
71616	C[C@@H](C1=NC=NC=C1F)[C@](CN2C=NC=N2)(C3=C(C=C(C=C3)F)F)O	Active	Active	Non-active	Non-active	Active	Non-active
71401	C1=CC(=C(C(=C1)Cl)CC(=O)N=C(N)N)C	Active	Active	Non-active	Non-active	Active	Non-active
71279	CC1=C(C(=CC=C1)C)NC(=O)CN2CCN(CC2)CC(COC3=CC=CC=C3OC)O	Active	Active	Non-active	Non-active	Active	Non-active
71263	CC(C)N=CNC1=CC=C(C=C1)C2=CN=CN2	Active	Active	Non-active	Non-active	Active	Non-active
70223	C(COS(=O)(=O)O)N	Active	Active	Non-active	Non-active	Non-active	Non-active
68873	C[C@]12CCC(=O)C=C1[C@@H]3C[C@@H]3[C@@H]4[C@@H]2CC[C@]5([C@H]4[C@@H]6C[C@@H]6[C@@]57CCC(=O)O7)C	Active	Active	Non-active	Active	Active	Non-active
68844	CCN[C@H]1CN(S(=O)(=O)C2=C1C=C(S2)S(=O)(=O)N)CCCOC	Active	Active	Non-active	Active	Active	Non-active
68781	C[C@@H]1CC2=CC3=C(C(=C2C4=C(C(=C(C=C4C[C@@]1(C)O)OC)OC)OC)OC)OCO3	Active	Active	Non-active	Active	Active	Non-active
68614	C([C@H]([C@H]([C@@H]([C@H](C=O)[18F])O)O)O)O	Active	Active	Non-active	Non-active	Active	Non-active
68602	CC1=C(C(=CC=C1)C(C)C2=CN=CN2)C	Active	Active	Non-active	Non-active	Active	Non-active
68553	C1=CC(=C(C=C1Cl)Cl)COC(CN2C=CN=C2)C3=C(C=C(C=C3)Cl)Cl	Active	Active	Non-active	Active	Active	Non-active
68539	CN(C)CCCN1C2=CC=CC=C2CCC3=C1C=C(C=C3)C	Active	Active	Non-active	Non-active	Active	Non-active
54704426	C[C@@]1([C@H]2C[C@H]3[C@@H](C(=O)C(=C([C@]3(C(=O)C2=C(C4=C1C=CC=C4O)O)O)O)C(=O)N)N(C)C)O	Active	Active	Active	Active	Active	Active
54704052	C1=CSC(=C1)/C(=C\2/C3=C(C=CC(=C3)Cl)N(C2=O)C(=O)N)/O	Active	Active	Non-active	Active	Active	Non-active
54684459	C[C@@]1(C2C[C@H]3[C@@H](C(=O)C(=C([C@]3(C(=O)C2=C(C4=C(C=CC(=C41)Cl)O)O)O)O)C(=O)N)N(C)C)O	Active	Active	Non-active	Active	Active	Non-active
54683010	C[C@@]1(C2C[C@H]3[C@@H](C(=O)C(=C([C@]3(C(=O)C2=C(C4=C1C=CC=C4O)O)O)O)C(=O)N)N(C)C)O	Active	Active	Active	Active	Active	Active
54682468	C[C@@]1([C@H]2C[C@H]3[C@@H](C(=O)C(=C([C@]3(C(=O)C2=C(C4=C(C=CC(=C41)Cl)O)O)O)O)C(=O)N)N(C)C)O	Active	Active	Non-active	Active	Active	Non-active
54682463	CC(=O)C1=C([C@@H]2[C@@H]3[C@@H](CC4=C5C3=CNC5=CC=C4)C(N2C1=O)(C)C)O	Active	Active	Non-active	Active	Active	Non-active
54677971	CN1C(=C(C2=C(S1(=O)=O)C=CS2)O)C(=O)NC3=CC=CC=N3	Active	Active	Non-active	Active	Active	Non-active
54677640	C[C@@]1(C2CC3[C@@H](C(=O)C(=C([C@]3(C(=O)C2=C(C4=C1C=CC=C4O)O)O)O)C(=O)N)N(C)C)O	Active	Active	Active	Active	Non-active	Active
54676228	CN1C(=C(C2=CC=CC=C2S1(=O)=O)O)C(=O)NC3=CC=CC=N3	Active	Active	Non-active	Active	Active	Non-active
54676038	C1=CC=C2C(=C1)C(=C(C(=O)O2)CC3=C(C4=CC=CC=C4OC3=O)O)O	Active	Active	Non-active	Active	Active	Non-active
54608024	CC1[C@H](CC2(C([C@@H](C(O2)C(C[C@@H](C(C)[C@@H](C(C)/C=C(\C)/C(=C/C=C/C(=C/C#N)/C)/C)O)O)OC)OP(=O)(O)O)(C)C)OC1C/C=C/C3=COC(=N3)[C@H](C)CCNC(=O)C([C@@H](C(COC)N(C)C)O)O)O	Active	Active	Non-active	Active	Active	Non-active
54607240	CN(C)CCCNC1=C2C(=NC3=CC=CC=C31)C=CC=C2[N+](=O)[O-]	Active	Active	Non-active	Non-active	Active	Non-active
54603431	C1=CC=NC(=C1)N/N=C\2/C=CC(=O)C=C2O	Active	Active	Non-active	Non-active	Active	Non-active
54600704	CCOC1=CC=C(C=C1)C2=NC3=C(N2)C=C(C=C3)C4=NC5=C(N4)C=C(C=C5)N6CCN(CC6)C	Active	Active	Non-active	Active	Active	Non-active
52947716	CC[C@@H]\1CC[C@H]2[C@H]([C@H]([C@@H]([C@]3(O2)CC[C@@H]([C@@H](O3)C[C@@H](C)O)C)C)OC(=O)/C=C/[C@@H]([C@H]([C@@H](C(=O)[C@@H]([C@H]([C@@H](C(=O)[C@]([C@H]([C@@H](C/C=C/C=C1)C)O)(C)O)C)O)C)C)O)C)C	Active	Active	Non-active	Active	Non-active	Active
52944313	CCC[C@@H]1C[C@H](N(C1)C)C(=O)NC([C@H]2[C@@H]([C@@H]([C@H]([C@H](O2)SC)O)O)O)[C@H](C)Cl	Active	Active	Non-active	Active	Active	Non-active
49800019	C[C@H]1[C@@]([C@H]([C@@H](O1)O[C@H]2[C@@H]([C@H]([C@@H]([C@H]([C@@H]2O)O)N=C(N)N)O)N=C(N)N)O[C@H]3[C@H]([C@@H]([C@H]([C@@H](O3)CO)O)O)NC)(C=O)O	Active	Active	Active	Active	Non-active	Active
49797177	C1CN2C(=NN=C2C(F)(F)F)CN1C(=O)C3=CC[C@@H]([C@H](C3)N)C4=CC(=C(C(=C4)F)F)F	Active	Active	Non-active	Active	Active	Non-active
44582273	C[C@@H]1CC[C@@H]2[C@@H]1C[C@@]3(C4C[C@]2([C@]3(C(=C4)C(C)C)C(=O)O)C=O)CO[C@H]5[C@H]([C@@H]([C@@H]([C@H](O5)C)OC)O)O	Active	Active	Non-active	Active	Non-active	Non-active
44558871	C1[C@H]([C@@H]([C@H]([C@@H]([C@H]1N)O[C@@H]2[C@@H]([C@H]([C@@H]([C@H](O2)CN)O)O)N)O[C@H]3[C@@H]([C@@H]([C@H](O3)CO)O[C@@H]4[C@@H]([C@H]([C@@H]([C@H](O4)CN)O)O)N)O)O)N	Active	Active	Active	Active	Non-active	Active
44347164	CC1C(N/C(=C\2/C=CC=C(C2=O)O)/O1)C(=O)NCCCN(CCCNC(=O)C3=C(C(=CC=C3)O)O)C(=O)C4C(O/C(=C\5/C=CC=C(C5=O)O)/N4)C	Active	Active	Non-active	Active	Non-active	Active
44134584	C1CC(N(C1)C(=O)C(CCCN=C(N)N)NC(=O)C(CCCN=C(N)N)N)C(=O)N2CC(CC2C(=O)NCC(=O)NC(CC3=CC=CC=C3)C(=O)NC(CO)C(=O)NC(CC4=CC=CC=C4)C(=O)NC(CC5=CC=CC=C5)C(=O)NC(CCCN=C(N)N)C(=O)O)O	Active	Active	Non-active	Active	Non-active	Non-active
44326589	C1[C@H](C2=C(NC=N1)N(C=N2)C3C(C(C(O3)CO)O)O)O	Active	Active	Active	Active	Active	Active
44299148	C[C@@]12[C@@H]([C@@H](CC(O1)N3C4=CC=CC=C4C5=C6C(=C7C8=CC=CC=C8N2C7=C53)CNC6=O)NC)OC	Active	Active	Non-active	Active	Active	Non-active
44246735	CN1CC[C@]23C4[C@H]1CC5=C2C(=C(C=C5)O)OC3C(C=C4)O	Active	Active	Non-active	Active	Active	Non-active
44246730	CC(C)(C)C(C)(C1CC23CCC1(C4[C@@]25CCN([C@@H]3CC6=C5C(=C(C=C6)O)O4)CC7CC7)OC)O	Active	Active	Non-active	Non-active	Active	Non-active
25077495	CCNC(=O)[C@@H]1CCCN1C(=O)[C@H](CCCN=C(N)N)NC(=O)[C@H](CC(C)C)NC(=O)[C@@H](CC2=CNC3=CC=CC=C32)NC(=O)[C@H](CC4=CC=C(C=C4)O)NC(=O)[C@H](CO)NC(=O)[C@H](CC5=CNC6=CC=CC=C65)NC(=O)[C@H](CC7=CN=CN7)NC(=O)[C@@H]8CCC(=O)N8	Active	Active	Non-active	Active	Active	Non-active
25074470	CC(C)C[C@@H](C(=O)N[C@@H](CCCN=C(N)N)C(=O)N1CCC[C@H]1C(=O)NCC(=O)N)NC(=O)[C@@H](CC2=CNC3=CC=CC=C32)NC(=O)[C@H](CC4=CC=C(C=C4)O)NC(=O)[C@H](CO)NC(=O)[C@H](CC5=CNC6=CC=CC=C65)NC(=O)[C@H](CC7=CN=CN7)NC(=O)[C@@H]8CCC(=O)N8	Active	Active	Non-active	Active	Active	Non-active
24181585	C1=C2C(=C3C=C(C(=O)C(=C3OC2=C(C(=C1I)O)I)I)I)C4=C(C(=C(C(=C4Cl)Cl)Cl)Cl)C(=O)O	Active	Active	Non-active	Active	Active	Non-active
24181126	C1=CC=C(C(=C1)C2=C3C=CC(=O)C=C3OC4=C2C=CC(=C4)O)C(=O)O	Active	Active	Non-active	Active	Active	Non-active
24180873	C1=CC=C(C(=C1)C2=C3C=C(C(=O)C(=C3OC4=C(C(=C(C=C24)Br)O)Br)Br)Br)C(=O)O	Active	Active	Non-active	Active	Active	Non-active
24011657	C[C@H]1[C@@H]([C@H]([C@H]([C@@H](O1)O[C@H]2CC[C@@]3(C4CC[C@@]5([C@H](CC[C@@]5([C@@H]4CCC3=C2)O)C6=COC(=O)C=C6)C)C)O)O)O	Active	Active	Non-active	Active	Active	Non-active
23424038	COC1=CC2=C(C=CN=C2C=C1)[C@@H](C3CC4CCN3CC4C=C)O	Active	Active	Non-active	Active	Active	Non-active
23223059	CC1=C(N=C2C=CC(=CC2=C1C(=O)O)F)C3=CC=C(C=C3)C4=CC=CC=C4F	Active	Active	Non-active	Active	Active	Non-active
22120443	CN1CCC23C4C1CC5=C2C(=C(C=C5)O)OC3C(C=C4)O	Active	Active	Non-active	Active	Active	Non-active
21977422	C1(=C(C(=C(C(=C1Cl)Cl)Cl)Cl)Cl)O	Active	Active	Non-active	Non-active	Non-active	Non-active
23681059	C[C@@H](C1=CC2=C(C=C1)C=C(C=C2)OC)C(=O)[O-]	Active	Active	Non-active	Non-active	Active	Non-active
23679527	CC(C)N1C2=CC=CC=C2C(=C1/C=C/[C@@H](C[C@@H](CC(=O)[O-])O)O)C3=CC=C(C=C3)F	Active	Active	Non-active	Active	Active	Non-active
23672584	CC(C)(C)SC1=C(N(C2=C1C=C(C=C2)OCC3=NC4=CC=CC=C4C=C3)CC5=CC=C(C=C5)Cl)CC(C)(C)C(=O)[O-]	Active	Active	Non-active	Active	Active	Non-active
23671691	C[C@]12CCC(=O)C=C1C=C[C@@H]3[C@@H]2CC[C@]4([C@H]3CC[C@]4(CCC(=O)[O-])O)C	Active	Active	Non-active	Active	Active	Non-active
23665864	C1CN(CCC1C(=O)[O-])C2=NC3=C(C=C(C=C3)Cl)C(=N2)NCC4=CC5=C(C=C4)OCO5	Active	Active	Non-active	Active	Active	Non-active
23665637	CC1([C@@H](N2[C@H](S1)[C@@H](C2=O)NC(=O)[C@@H](C3=CC=C(C=C3)O)N)C(=O)O)C	Active	Active	Active	Active	Non-active	Active
23663992	CC(C)C1=C(C(=C(C(=N1)C(C)C)/C=C/[C@H](C[C@H](CC(=O)[O-])O)O)C2=CC=C(C=C2)F)COC	Active	Active	Non-active	Active	Active	Non-active
23663964	CC1=C(N=C2C=CC(=CC2=C1C(=O)[O-])F)C3=CC=C(C=C3)C4=CC=CC=C4F	Active	Active	Non-active	Active	Active	Non-active
23663954	OC(=O)C1=CC2=C(O1)C=CC(CC1=CN=CC=C1)=C2	Active	Active	Non-active	Active	Active	Non-active
23663937	C\C(=C/C1=CC=C(CC2=CN=CC=C2)C=C1)C(O)=O	Active	Active	Non-active	Non-active	Active	Non-active
23652247	COC1=CC=C(C=C1)C2CC3=C(C=C(C=C3)O)OC2	Active	Active	Non-active	Non-active	Active	Non-active
23581813	CCN(CC)CCCC(C)NC1=C2C=C(C=CC2=NC3=C1C=CC(=C3)Cl)OC	Active	Active	Non-active	Non-active	Active	Non-active
21872023	CCCC1CC(N(C1)C)C(=O)NC(C2C(C(C(C(O2)SC)O)O)O)C(C)O	Active	Active	Active	Active	Active	Active
21872021	CCCC1CC(N(C1)C)C(=O)NC(C2C(C(C(C(O2)SC)O)O)O)C(C)Cl	Active	Active	Non-active	Active	Non-active	Active
18943026	C1=CC=C(C(=C1)C(=O)O)O	Active	Active	Non-active	Non-active	Active	Non-active
18618996	CN1C2CCC1C(C(C2)C3=CC=C(C=C3)I)C(=O)OC	Active	Active	Non-active	Non-active	Active	Non-active
17756950	CC(C)C1=CC2=C(C=C1)N(C(=C2SC(C)(C)C)CC(C)(C)C(=O)[O-])CC3=CC=C(C=C3)Cl	Active	Active	Non-active	Active	Active	Non-active
17756794	C1[C@@H]([C@@H]([C@H]([C@@H]1O)/C=C/[C@H](COC2=CC(=CC=C2)Cl)O)C/C=C\CCCC(=O)[O-])O	Active	Active	Non-active	Active	Active	Non-active
15489645	CCC(C)[C@H]1C(=O)N2CCCC[C@@H]2C(=O)N[C@H](C(=O)N[C@H](C(=O)N1)CC3=CN(C4=CC=CC=C43)OC)CCCCCC(=O)OC	Active	Active	Non-active	Active	Non-active	Non-active
14840430	C[C@@H](C(=O)N[C@@H](CC1=CC=CC=C1)C(=O)N[C@@H](CC(=O)O)C(=O)N[C@@H](C(C)C)C(=O)N[C@@H](C(C)C)C(=O)NCC(=O)N)NC(=O)[C@H](CC2=CC=C(C=C2)O)N	Active	Active	Non-active	Active	Non-active	Non-active
14179013	CC[C@H](C)N1C(=O)N(C=N1)C2=CC=C(C=C2)N3CCN(CC3)C4=CC=C(C=C4)OC[C@H]5CO[C@](O5)(CN6C=NC=N6)C7=C(C=C(C=C7)Cl)Cl	Active	Active	Non-active	Active	Active	Non-active
16760703	CCCC(CCC)C(O)=O	Active	Active	Non-active	Non-active	Active	Non-active
16759606	OC\C=C\C=C/C=C\[C@H](O)C[C@@H](OP(=O)(O)O)[C@](C)(O)\C=C\[C@H]1CC=CC(=O)O1	Active	Active	Non-active	Active	Non-active	Active
16759173	CC[C@H](C)C(=O)O[C@H]1C[C@H](O)C=C2C=C[C@H](C)[C@H](CC[C@@H](O)C[C@@H](O)CC(O)=O)[C@@H]12	Active	Active	Non-active	Active	Non-active	Non-active
11957723	C[C@]12CCC3C(C1CC[C@@H]2NCCCCCCN4C(=O)C=CC4=O)CCC5=C3C=CC(=C5)OC	Active	Active	Non-active	Active	Active	Non-active
11957717	C\1=CC(=O)C(=C/C1=C\C(=C(N)S)C#N)O	Active	Active	Non-active	Non-active	Non-active	Non-active
11957501	CCNC(=O)[C@@H]1[C@@H](C([C@@H](O1)N2C=NC3=C2N=C(N=C3N)NCCC4=CC=C(C=C4)CCC(=O)O)O)O	Active	Active	Non-active	Active	Active	Non-active
11957487	ClC1=CC=CC(=C1)N1CCNCC1	Active	Active	Non-active	Non-active	Active	Non-active
16132369	CC[C@H](C)[C@@H](C(=O)N[C@@H](CC1=CC=CC=C1)C(=O)N[C@@H]([C@@H](C)O)C(=O)N[C@@H](CCC(=O)N)C(=O)N[C@@H](CCC(=O)N)C(=O)N[C@@H](CC2=CC=C(C=C2)O)C(=O)N[C@@H](CO)C(=O)N[C@@H](CCCCN)C(=O)N[C@@H](CC(C)C)C(=O)N[C@@H](CC(C)C)C(=O)N[C@@H](C)C(=O)N[C@@H](CCCCN)C(=O)N[C@@H](CC(C)C)C(=O)N[C@@H](C)C(=O)N[C@@H](CC(C)C)C(=O)N[C@@H](CCC(=O)N)C(=O)N[C@@H](CCCCN)C(=O)N[C@@H](CC3=CC=C(C=C3)O)C(=O)N[C@@H](CC(C)C)C(=O)…	Active	Active	Non-active	Active	Non-active	Non-active
16130199	CC[C@H](C)[C@@H](C(=O)N[C@@H](CCC(=O)O)C(=O)N[C@@H](CCC(=O)O)C(=O)N[C@@H](CO)C(=O)N[C@@H](CCC(=O)N)C(=O)N[C@@H](CC(=O)N)C(=O)N[C@@H](CCC(=O)N)C(=O)N[C@@H](CCC(=O)N)C(=O)N[C@@H](CCC(=O)O)C(=O)N[C@@H](CCCCN)C(=O)N[C@@H](CC(=O)N)C(=O)N[C@@H](CCC(=O)O)C(=O)N[C@@H](CCC(=O)N)C(=O)N[C@@H](CCC(=O)O)C(=O)N[C@@H](CC(C)C)C(=O)N[C@@H](CC(C)C)C(=O)N[C@@H](CCC(=O)O)C(=O)N[C@@H](CC(C)C)C(=O)N[C@@H](CC(=O)O)C(=O…	Active	Active	Non-active	Active	Active	Non-active
11268547	C[C@@H]1C[C@H]2[C@H](O2)/C=C\C=C\C(=O)CC3=C(C(=CC(=C3Cl)O)O)C(=O)O1	Active	Active	Non-active	Active	Non-active	Active
11243969	C1[C@@H]2C[C@@H]2N([C@@H]1C#N)C(=O)[C@H](C34CC5CC(C3)CC(C5)(C4)O)N	Active	Active	Non-active	Non-active	Non-active	Non-active
12795618	CCCCC(C)(C)[C@@H](/C=C/C1[C@@H](CC(=O)[C@@H]1CCCC/C=C/C(=O)OC)O)O	Active	Active	Non-active	Active	Non-active	Non-active
10685477	C1[C@@H]([C@H](C(=O)O1)CC2=CC(=CC=C2)O)CC3=CC(=CC=C3)O	Active	Active	Non-active	Active	Active	Non-active
11586368	C1=CC(=CC(=C1)O)CNN	Active	Active	Non-active	Non-active	Active	Non-active
11476287	C1CN2C(=NN=C2C(F)(F)F)CN1C(=O)C[C@@H](CC3=CC(=C(C=C3F)F)F)N	Active	Active	Non-active	Active	Active	Non-active
10096344	CC#CCN1C2=C(N=C1N3CCC[C@H](C3)N)N(C(=O)N(C2=O)CC4=NC5=CC=CC=C5C(=N4)C)C	Active	Active	Non-active	Active	Active	Non-active
10070040	CCC(=O)N(C1=CC=CC=C1)[C@]2(CCN(C[C@H]2C)CCC3=CC=CC=C3)C(=O)OC	Active	Active	Non-active	Non-active	Active	Non-active
9959259	CC(C)[C@@H](C(=O)N[C@@H](CC(=O)O)C(=O)CCl)NC(=O)[C@H](CCC(=O)O)NC(=O)[C@H](CC(=O)O)NC(=O)C	Active	Active	Non-active	Active	Active	Non-active
9954082	CCN(CC)CCO[C@H]1CC[C@@]2([C@H]3CC[C@]4([C@H]([C@@H]3CC=C2C1)CCC4=O)C)C	Active	Active	Non-active	Active	Active	Non-active
9919816	CC[C@@H](C)[C@H]1C(=O)N([C@H](C(=O)N[C@H](C(=O)N([C@H](C(=O)O[C@@H](C(=O)N([C@H](C(=O)N[C@H](C(=O)N([C@H](C(=O)N2CCC[C@H]2C(=O)N1)CC3=CC=CC=C3)C)CC4=CC=CC=C4)C(C)C)C)[C@H](C)CC)C(C)(C)O)C)CC(C)C)C(C)C)C	Active	Active	Non-active	Active	Non-active	Active
9912412	C[C@@]12[C@@](CC(O1)N3C4=CC=CC=C4C5=C6C(=C7C8=CC=CC=C8N2C7=C53)CNC6=O)(C(=O)OC)O	Active	Active	Non-active	Active	Active	Non-active
9908389	CC(C)C[C@H]([C@H](CC=C)C(=O)NO)C(=O)N[C@@H](CC1=CC=CC=C1)C(=O)NC	Active	Active	Non-active	Active	Active	Non-active
9884233	CC(C)(C)NCC(C1=CC(=C(C=C1)O)CO)O	Active	Active	Non-active	Non-active	Active	Non-active
9865808	C1=CC(=CC=C1C2=CC(=NN2C3=CC=C(C=C3)S(=O)(=O)N)C(F)(F)F)Cl	Active	Active	Non-active	Active	Active	Non-active
9861452	CC(C)NCC(C1=CC(=CC(=C1)O)O)O	Active	Active	Non-active	Non-active	Active	Non-active
9844225	CC(=O)O[C@H]1C=C[C@H]2[C@H]3CC4=C5[C@]2([C@H]1OC5=C(C=C4)OC(=O)C)CCN3C	Active	Active	Non-active	Active	Active	Non-active
9829825	C[C@H]1[C@@H]([C@H]([C@H]([C@@H](O1)O[C@H]2C[C@H]([C@@]3([C@H]4[C@@H](C[C@@]5([C@H](CC[C@@]5(C4CC[C@@]3(C2)O)O)C6=CC(=O)OC6)C)O)CO)O)O)O)O	Active	Active	Non-active	Active	Active	Non-active
9551858	C1CN(CCN1CCOCC(=O)O)C(C2=CC=CC=C2)C3=CC=C(C=C3)Cl	Active	Active	Non-active	Non-active	Active	Non-active
9547215	C[C@]12CC[C@@H](C[C@H]1CC[C@@H]3[C@@H]2CC[C@]4([C@@]3(CC[C@@H]4C5=COC(=O)C=C5)O)C)O	Active	Active	Non-active	Active	Active	Non-active
9815618	C[C@@H](CC1=CC(=CC=C1)C(F)(F)F)N	Active	Active	Non-active	Non-active	Active	Non-active
9803932	C1CNCCN(C1)S(=O)(=O)C2=CC=CC3=C2C=CC=C3I	Active	Active	Non-active	Non-active	Active	Non-active
9795678	C1CCC(CC1)(C2=CC=CC=C2)N3CCCCC3	Active	Active	Non-active	Non-active	Active	Non-active
9794358	C[C@@H]1[C@H]2[C@](C(=O)O2)(NC1=O)[C@H](C(C)C)O	Active	Active	Non-active	Non-active	Non-active	Active
9576787	CCC/C=C/C/C=C/C=C/C=N/NN=O	Active	Active	Non-active	Non-active	Active	Non-active
9560989	COCCCC/C(=N\OCCN)/C1=CC=C(C=C1)C(F)(F)F	Active	Active	Non-active	Non-active	Active	Non-active
6918456	CC(=O)OC1=CC2=C(S1)CCN(C2)C(C3=CC=CC=C3F)C(=O)C4CC4	Active	Active	Non-active	Active	Active	Non-active
6918369	CCCCCN=C(N)NN/C=C/1\C=NC2=C1C=C(C=C2)OC	Active	Active	Non-active	Non-active	Active	Non-active
6918191	CN1C2=C(C=CC(=C2)[C@H](C3=CC=C(C=C3)Cl)N4C=NC=N4)N=N1	Active	Active	Non-active	Active	Active	Non-active
6918132	CCN[C@H]1C[C@@H](S(=O)(=O)C2=C1C=C(S2)S(=O)(=O)N)C	Active	Active	Non-active	Active	Active	Non-active
6917789	CNCCCCOC1=CC=CC=C1CC2=CC=CC=C2	Active	Active	Non-active	Non-active	Active	Non-active
6914692	CC(C)CC(C=O)NC(=O)C(CC(C)C)NC(=O)C(CC(C)C)NC(=O)OCC1=CC=CC=C1	Active	Active	Non-active	Active	Active	Non-active
6852398	CC(C)[C@@H](C(=O)NC(CCCN=C(N)N)C=O)NC(=O)[C@H](CCCN=C(N)N)NC(=O)NC(CC1=CC=CC=C1)C(=O)O	Active	Active	Non-active	Active	Active	Non-active
6852379	C=CCN1CCC2=C(CC1)SC(=N2)N	Active	Active	Non-active	Non-active	Non-active	Non-active
6713919	CC[C@@H]1[C@@]([C@@H]([C@H](C(=O)[C@@H](C[C@@]([C@@H]([C@H]([C@@H]([C@H](C(=O)O1)C)O[C@H]2C[C@@]([C@H]([C@@H](O2)C)O)(C)OC)C)O[C@@H]3[C@@H]([C@H](C[C@H](O3)C)N(C)C)O)(C)O)C)C)O)(C)O	Active	Active	Active	Active	Non-active	Active
6712523	CC(C)CCNC(=O)C(CC(C)C)NC(=O)[C@@H]1[C@H](O1)C(=O)O	Active	Active	Non-active	Non-active	Active	Non-active
6610292	C[C@@H]1[C@@H]([C@](NC1=O)([C@H](C(C)C)O)C(=O)SC[C@@H](C(=O)O)NC(=O)C)O	Active	Active	Non-active	Active	Non-active	Active
6604561	CCOC(=O)C1=CC=C(C=C1)OC(=O)CCCCCN=C(N)N	Active	Active	Non-active	Non-active	Active	Non-active
6603122	CC(C(C1=CC=C(C=C1)O)O)NCCC2=CC=C(C=C2)O	Active	Active	Non-active	Non-active	Active	Non-active
6108780	C1=CC=C(C=C1)NC2=NC(=NC(=N2)N(CCO)CCO)NC3=CC(=C(C=C3)/C=C/C4=C(C=C(C=C4)NC5=NC(=NC(=N5)NC6=CC=CC=C6)N(CCO)CCO)S(=O)(=O)O)S(=O)(=O)O	Active	Active	Non-active	Active	Active	Non-active
6093219	CCC(=O)O[C@@](CC1=CC=CC=C1)(C2=CC=CC=C2)[C@H](C)CN(C)C	Active	Active	Non-active	Active	Active	Non-active
5942250	CC1=C(C(CCC1)(C)C)CC/C(=C/CCC2=CCC(OC2O)C3=CC(=O)OC3O)/C	Active	Active	Non-active	Active	Non-active	Non-active
5940264	C1C/C(=C\Br)/OC(=O)C1C2=CC=CC3=CC=CC=C32	Active	Active	Non-active	Non-active	Active	Non-active
5894473	C1=CC=C2C(=C1)C=CC=C2C(=O)/C=C/C3=C(C=CC4=CC=CC=C43)O	Active	Active	Active	Active	Active	Non-active
5702286	CC[C@H](C)C(=O)O[C@H]1CCC=C2[C@H]1C([C@H](C=C2)C)CCC3C[C@H](CC(=O)O3)O	Active	Active	Non-active	Active	Active	Non-active
5702242	C1CN(CCN1)C2=NC3=CC=CC=C3C=C2	Active	Active	Non-active	Non-active	Active	Non-active
5702200	CC(C)CC(=O)OC1C(O[C@@H]2C[C@H]([C@H]3CC[C@@]45CC(CC[C@H]4[C@]3(C)C2)C(=C)[C@@H]5O)C(O)=O)OC(CO)C(OS(O)(=O)=O)C1OS(O)(=O)=O	Active	Active	Non-active	Active	Non-active	Non-active
5702163	CN(C)C1=NC=NC2=C1N=CN2C3[C@@H]([C@@H]([C@H](O3)CO)NC(=O)[C@H](CC4=CC=C(C=C4)OC)N)O	Active	Active	Non-active	Active	Active	Non-active
5702127	CC(=O)OCC(=O)[C@]1([C@@H](CC2[C@@]1(C[C@@H]([C@]3(C2CCC4=CC(=O)C=C[C@@]43C)F)O)C)OC(=O)C)O	Active	Active	Non-active	Active	Non-active	Non-active
5702119	C[C@H]1[C@@](C([C@@H](O1)O[C@@H]2[C@H]([C@@H]([C@H]([C@@H]([C@H]2O)O)N=C(N)N)O)N=C(N)N)O[C@H]3[C@H]([C@@H]([C@H]([C@@H](O3)CO)O)O)NC)(C=O)O	Active	Active	Active	Active	Non-active	Active
5702078	CCC[C@@H]1C[C@H](N(C1)C)C(=O)N[C@H]([C@@H]2[C@@H]([C@@H]([C@H]([C@H](O2)SC)O)O)O)[C@H](C)O	Active	Active	Active	Active	Active	Active
5702077	CC(=O)N1CCN(CC1)C2=CC=C(C=C2)OCC3CO[C@](O3)(CN4C=CN=C4)C5=C(C=C(C=C5)Cl)Cl	Active	Active	Non-active	Active	Active	Non-active
5702047	CC[C@H]1CN2CCC3=CC(=C(C=C3C2C[C@@H]1CC4C5=CC(=C(C=C5CCN4)OC)OC)OC)OC	Active	Active	Non-active	Active	Active	Non-active
5702042	C[C@@H]1[C@H]([C@H](C[C@@H](O1)O[C@@H]2[C@H](O[C@H](C[C@@H]2O)O[C@@H]3[C@H](O[C@H](C[C@@H]3O)O[C@H]4CC[C@]5([C@@H](C4)CCC6C5C[C@H]([C@]7([C@@]6(CC[C@@H]7C8=CC(=O)OC8)O)C)O)C)C)C)O)O	Active	Active	Non-active	Active	Active	Non-active
5702025	CCC[C@@H]1C[C@H](N(C1)C)C(=O)NC(C2[C@@H]([C@@H]([C@H]([C@H](O2)SC)O)O)O)C(C)Cl	Active	Active	Non-active	Active	Active	Non-active
5018304	OC(=O)CC1=CC=CC=C1NC1=C(Cl)C=CC=C1Cl	Active	Active	Non-active	Non-active	Active	Non-active
6450930	C/C(=C/C=C/C=C(\C=C\C=C(/C(=O)O)\C)/C)/C=C/C=C(\C(=O)O)/C	Active	Active	Non-active	Non-active	Active	Non-active
6450501	C1=CC=C(C=C1)/C(=C/CCCCC(=O)O)/C2=CC=NC=C2	Active	Active	Non-active	Non-active	Active	Non-active
6438381	CC(=CCC/C(=C/CC/C(=C/CSC[C@@H](C(=O)O)NC(=O)C)/C)/C)C	Active	Active	Non-active	Non-active	Active	Non-active
6438355	CC[C@H](C)C[C@H](C)/C=C/C(=O)O[C@@H]1[C@H]([C@]2(O[C@@H]([C@]([C@@]1(O2)C(=O)O)(C(=O)O)O)C(=O)O)CCC(=C)[C@H]([C@H](C)CC3=CC=CC=C3)OC(=O)C)O	Active	Active	Non-active	Active	Non-active	Active
6438352	CN1CCN(CC1)C2=NC3=C(C=CC(=C3)C(F)(F)F)N4C2=CC=C4	Active	Active	Non-active	Active	Active	Non-active
6438330	CCCC[C@@H](C)/C=C(\C)/C=C(\C)/C(=O)NC1=C[C@]([C@H]2[C@@H](C1=O)O2)(/C=C/C=C/C=C/C(=O)NC3=C(CCC3=O)O)O	Active	Active	Non-active	Active	Non-active	Active
6438151	CC[C@H]1[C@H]([C@@H](C/C(=C/C=C/[C@@H]([C@H](OC(=O)/C(=C/C(=C/[C@H]([C@H]1O)C)/C)/OC)[C@@H](C)[C@H]([C@H](C)[C@]2(C[C@H]([C@@H]([C@H](O2)/C=C/C)C)O[C@H]3C[C@H]([C@@H]([C@H](O3)C)OC(=O)N)O)O)O)OC)/C)C)O	Active	Active	Active	Active	Active	Active
6438130	C1=CC(=CC=C1CN2C=CN=C2)/C=C/C(=O)O	Active	Active	Non-active	Non-active	Active	Non-active
6437850	C1=CC(=CC=C1CC/C(=C\F)/CN)F	Active	Active	Non-active	Non-active	Active	Non-active
6437849	C1CN(CCN1CCC2=CC=C(C=C2)C(=O)O)C/C=C/C3=CC=C(C=C3)Cl	Active	Active	Non-active	Active	Active	Non-active
6437084	CCCCCC(/C=C/C=C\C/C=C\C/C=C\CCCC(=O)O)OO	Active	Active	Non-active	Non-active	Active	Non-active
6436187	C[C@H]1CCC/C=C/C2C[C@@H](C[C@H]2[C@@H](/C=C/C(=O)O1)O)O	Active	Active	Active	Non-active	Non-active	Active
6435921	C1CNC[C@H]([C@@H]1C2=CC=C(C=C2)F)COC3=CC4=C(C=C3)OCO4	Active	Active	Non-active	Active	Active	Non-active
6435286	CCCCC/C=C\C/C=C\C=C\C=C\[C@H]([C@H](CCCC(=O)O)O)SCC(C(=O)NCC(=O)O)N	Active	Active	Non-active	Active	Active	Non-active
6432394	CCOC(=O)C1(CCN(CC1)CCC(C#N)(C2=CC=CC=C2)C3=CC=CC=C3)C4=CC=CC=C4	Active	Active	Non-active	Non-active	Active	Non-active
6420049	C1=NC(=NC(=O)N1C2[C@H]([C@H]([C@H](O2)CO)O)O)N	Active	Active	Non-active	Active	Active	Non-active
6420001	C[C@@H](C(=O)NC(CC(C)C)[C@H](CC(=O)O)O)NC(=O)C[C@@H](C(CC(C)C)NC(=O)[C@H](C(C)C)NC(=O)C(C(C)C)NC(=O)CC(C)C)O	Active	Active	Non-active	Active	Active	Non-active
6419988	CN(C)C1=NC=NC2=C1N=CN2[C@H]3C([C@H]([C@H](O3)CO)NC(=O)C(CC4=CC=C(C=C4)OC)N)O	Active	Active	Non-active	Active	Active	Non-active
6419968	C1C(C(C(C(C1N)OC2C(C(C(C(O2)CN)O)O)N)O[C@H]3C([C@H]([C@H](O3)CO)OC4C(C(C(C(O4)CN)O)O)N)O)O)N	Active	Active	Active	Active	Non-active	Active
6419950	C[C@@H]1CC[C@@]2(CC[C@@]3(C(=CCC4[C@]3(CCC5[C@@]4(CC[C@@H](C5(C)C)O)C)C)[C@@H]2[C@H]1C)C)C(=O)O	Active	Active	Non-active	Non-active	Active	Non-active
6419775	CN(C)CCCN1C=C(C2=CC=CC=C21)C3=C(C(=O)NC3=O)C4=CNC5=CC=CC=C54	Active	Active	Non-active	Active	Active	Non-active
6410797	CC1=CC(=NN=C1NCCN2CCOCC2)C3=CC=CC=C3	Active	Active	Non-active	Non-active	Active	Non-active
6324906	C[C@@H]1[C@H]([C@H](C[C@@H](O1)O[C@@H]2[C@H](O[C@H](C[C@@H]2O)O[C@@H]3[C@H](O[C@H](C[C@@H]3O)O[C@H]4CC[C@]5([C@@H](C4)CC[C@@H]6C5CC[C@]7([C@@]6(CC[C@@H]7C8=CC(=O)OC8)O)C)C)C)C)OC(=O)C)O	Active	Active	Non-active	Active	Active	Non-active
6324659	CC(C)(C)S(=O)(=O)C[C@@H](CC1=CC=CC=C1)C(=O)N[C@@H](CC2=CN=CN2)C(=O)N[C@@H](CC3CCCCC3)[C@H]([C@H](C4CC4)O)O	Active	Active	Non-active	Active	Non-active	Non-active
6314395	C1=CC(=CC=C1/C(=C/2\C=C(C=CC2=O)F)/NCCCC(=O)N)Cl	Active	Active	Non-active	Active	Active	Non-active
4488326	CC(C(=O)NCC(=O)N(C)C(CC1=CC=CC=C1)C(=O)NCCO)NC(=O)C(CC2=CC=C(C=C2)O)N	Active	Active	Non-active	Active	Active	Non-active
4336830	CC(=O)NNC(=O)N1CC2=CC=CC=C2OC3=C1C=C(C=C3)Cl	Active	Active	Non-active	Non-active	Active	Non-active
4306515	COC1=CC=C(C=C1)N2C(=CC(=N2)C(F)(F)F)C3=CC=C(C=C3)Cl	Active	Active	Non-active	Active	Active	Non-active
5497171	C[C@@H](C(=O)N[C@@H](CC(=O)O)C(=O)CF)NC(=O)[C@H](C(C)C)NC(=O)OCC1=CC=CC=C1	Active	Active	Non-active	Active	Active	Non-active
5497136	CCCCCCCCCCCCC/C=C/[C@H]([C@H](CO)NC(=O)C)O	Active	Active	Non-active	Non-active	Active	Non-active
5487663	C[C@H](C(=O)NCC(=O)N[C@@H](CC1=CC=CC=C1)C(=O)NNC(=O)[C@H](CC2=CC=CC=C2)NC(=O)CNC(=O)[C@@H](C)NC(=O)[C@H](CC3=CC=C(C=C3)O)N)NC(=O)[C@H](CC4=CC=C(C=C4)O)N	Active	Active	Non-active	Active	Non-active	Non-active
5487301	CCCCCN=C(N)NN/C=C/1\C=NC2=C1C=C(C=C2)CO	Active	Active	Non-active	Non-active	Active	Non-active
5486971	CC(C)C[C@@H](CC(=O)O)CN	Active	Active	Non-active	Non-active	Active	Non-active
5486715	C1=CC=C(C=C1)C[C@@H](C(=O)NCCC(=O)O)N[C@@H](CC2=CC=CC=C2)C(=O)O	Active	Active	Non-active	Active	Active	Non-active
5478883	C[C@@H](C(=O)N[C@@H](CC(C)C)[C@H](CC(=O)O)O)NC(=O)C[C@@H]([C@H](CC(C)C)NC(=O)[C@H](C(C)C)NC(=O)[C@H](C(C)C)NC(=O)CC(C)C)O	Active	Active	Non-active	Active	Active	Non-active
5476534	C1=CC2=C(C=C1C(=N)N)C=C(O2)/C=C/C3=CC4=C(O3)C=CC(=C4)C(=N)N	Active	Active	Non-active	Active	Active	Non-active
5473758	CCN\1C2=CC=CC=C2S/C1=C\C=C\C=C\C3=[N+](C4=CC=CC=C4S3)CC	Active	Active	Non-active	Non-active	Active	Non-active
5469318	CC(=CCC/C(=C/CC/C(=C/CSC1=CC=CC=C1C(=O)O)/C)/C)C	Active	Active	Non-active	Non-active	Active	Non-active
5468688	CC[C@H]1[C@H]([C@@H](C/C(=C/C=C/[C@@H]([C@H](OC(=O)/C(=C/C(=C/[C@H]([C@H]1O)C)/C)/OC)[C@@H](C)[C@H]([C@H](C)[C@]2(C[C@@H]([C@@H]([C@H](O2)/C=C/C)C)OC3CC(C(C(O3)C)OC(=O)N)O)O)O)OC)/C)C)O	Active	Active	Non-active	Active	Active	Active
5464467	C1=C(C(=O)C(=CC1=C(N)NO)O)O	Active	Active	Non-active	Active	Active	Non-active
5464105	CC(=O)C(=CC1=CC(=C(C(=C1)O)O)[N+](=O)[O-])C(=O)C	Active	Active	Non-active	Non-active	Active	Non-active
5464086	CN1CC[C@]23C4C(=O)CC[C@]2([C@H]1CC5=C3C(=C(C=C5)OC)O4)O	Active	Active	Non-active	Non-active	Active	Non-active
5462519	C[C@@]1(CSC(=N1)C(C)(C)[C@@H]([C@@H]2CSC(N2)[C@H]3CS/C(=C/4\C=CC=CC4=O)/N3)O)C(=O)O	Active	Active	Non-active	Active	Non-active	Active
5462471	C[C@H](C(=O)NCC(=O)N(C)[C@@H](CC1=CC=CC=C1)C(=O)NCCO)NC(=O)[C@H](CC2=CC=C(C=C2)O)N	Active	Active	Non-active	Active	Active	Non-active
5462347	CN1CC[C@]23[C@@H]4[C@H]1CC5=C2C(=C(C=C5)O)O[C@H]3C(=O)CC4	Active	Active	Non-active	Active	Active	Non-active
5458428	C[C@H]1C/C=C/[C@H]2[C@@H](C(=C)[C@H]([C@@H]3[C@@]2([C@@H](/C=C/[C@@](C1=O)(C)O)OC(=O)C)C(=O)N[C@H]3CC4=CC=CC=C4)C)O	Active	Active	Non-active	Active	Non-active	Active
5458171	C1=CC(=C2C(=C1NCCNCCO)C(=O)C3=C(C=CC(=C3C2=O)O)O)NCCNCCO	Active	Active	Non-active	Active	Active	Non-active
5386591	C=CCSS/C=C/CS(=O)CC=C	Active	Active	Non-active	Non-active	Active	Non-active
5362417	COCCOC[C@H](CC1(CCCC1)C(=O)NC2CCC(CC2)C(=O)O)C(=O)OC3=CC4=C(CCC4)C=C3	Active	Active	Non-active	Active	Non-active	Non-active
5362391	C1=CC(=CC(=C1)C(F)(F)F)/C(=N\OCCCCC(=O)O)/C2=CN=CC=C2	Active	Active	Non-active	Active	Active	Non-active
5360733	C1CC(C1)CN2CC[C@]34[C@@H]5[C@H](CC[C@]3([C@H]2CC6=C4C(=C(C=C6)O)O5)O)O	Active	Active	Non-active	Non-active	Active	Non-active
5359421	CN1CC[C@]23[C@@H]4[C@H]1CC5=C2C(=C(C=C5)O)O[C@H]3[C@H](CC4)O	Active	Active	Non-active	Active	Active	Non-active
5359271	CCOC1=C2C3=C(C[C@@H]4[C@H]5[C@]3(CCN4C)[C@@H](O2)[C@H](C=C5)O)C=C1	Active	Active	Non-active	Active	Active	Non-active
5359227	CN1CC[C@]23[C@@H]4[C@H]1CC5=C2C(=C(C=C5)OC)O[C@H]3[C@H](C=C4)O	Active	Active	Non-active	Active	Active	Non-active
5357439	C1=CC=C(C(=C1)C(=O)O)NN=C2C=CC(=O)C=C2	Active	Active	Non-active	Non-active	Active	Non-active
5357394	CN1CC[C@]23[C@@H]4[C@H]1CC5=C2C(=C(C=C5)OC)O[C@H]3C(C=C4)O	Active	Active	Non-active	Active	Active	Non-active
5353940	C1=CC(=O)C=CC1=C2NC(=C(N2)C3=CC=NC=C3)C4=CC=C(C=C4)F	Active	Active	Non-active	Active	Active	Non-active
5353609	COC(=O)/C=C/C1=C(C=CC(=C1)O)O	Active	Active	Non-active	Non-active	Active	Non-active
5352018	C/C=C/C/C=C/CCC(=O)C1C(O1)C(=O)N	Active	Active	Non-active	Non-active	Active	Non-active
5328779	C1=CC=C(C=C1)CNC(=O)/C(=C/C2=CC(=C(C=C2)O)O)/C#N	Active	Active	Non-active	Non-active	Active	Non-active
5317750	COC1=C(C=C2C(=C1)C(=O)C(=CO2)C3=CC=C(C=C3)O)O	Active	Active	Non-active	Active	Active	Non-active
5312126	CN([C@@H](CC1=CC=C(C=C1)OS(=O)(=O)C2=CC=CC3=C2C=CN=C3)C(=O)N4CCN(CC4)C5=CC=CC=C5)S(=O)(=O)C6=CC=CC7=C6C=CN=C7	Active	Active	Non-active	Active	Active	Non-active
5311403	CCOC1=CC=CC=C1O[C@H]([C@H]2CNCCO2)C3=CC=CC=C3	Active	Active	Non-active	Non-active	Active	Non-active
5311365	C[C@H]1[C@@H](C[C@@]2(C([C@H]([C@H](O2)[C@H](C[C@@H]([C@H](C)[C@@H]([C@H](C)/C=C(\C)/C(=C/C=C/C(=C\C#N)/C)/C)O)O)OC)OP(=O)(O)O)(C)C)O[C@H]1C/C=C/C3=COC(=N3)[C@@H](C)CCNC(=O)[C@H]([C@H]([C@H](COC)N(C)C)O)O)O	Active	Active	Non-active	Active	Active	Non-active
5311139	C[C@@H](C(=O)N[C@@H](CC(=O)O)C=O)NC(=O)[C@H](C(C)C)NC(=O)[C@H](CC1=CC=C(C=C1)O)NC(=O)C	Active	Active	Non-active	Active	Active	Non-active
5311100	C1[C@@H]([C@@H]([C@H]([C@@H]1O)/C=C/[C@H](COC2=CC=CC(=C2)C(F)(F)F)O)C/C=C\CCCC(=O)O)O	Active	Active	Non-active	Active	Active	Non-active
5311080	C1C[C@H](N(C1)C(=O)[C@H](CC2=CC=C(C=C2)O)N)C(=O)N[C@@H](CC3=CNC4=CC=CC=C43)C(=O)N[C@@H](CC5=CC=CC=C5)C(=O)N	Active	Active	Non-active	Active	Active	Non-active
5311068	CC1=C(C(=CC=C1)[C@H](C)C2=CN=CN2)C	Active	Active	Non-active	Non-active	Active	Non-active
5311037	CCN1C2=C(C(=O)N(C1=O)CC)N(C(=N2)/C=C/C3=CC(=C(C=C3)OC)OC)C	Active	Active	Non-active	Active	Active	Non-active
5289124	CC1=C(C(=CC=C1)O)C(=O)OC[C@]2([C@H]([C@@H]([C@]([C@@]2(C)O)([C@H](C)O)NC(=O)N(C)C)N)NC3=CC=CC(=C3)C(=O)C)O	Active	Active	Active	Active	Non-active	Active
5288826	CN1CC[C@]23[C@@H]4[C@H]1CC5=C2C(=C(C=C5)O)O[C@H]3[C@H](C=C4)O	Active	Active	Non-active	Active	Active	Non-active
5288209	CC1=C(C(CCC1)(C)C)/C=C/C(=C/C=C/C(=C/C(=O)NC2=CC=C(C=C2)O)/C)/C	Active	Active	Non-active	Active	Active	Non-active
5284604	CN1CC[C@]23[C@@H]4C(=O)CC[C@]2([C@H]1CC5=C3C(=C(C=C5)O)O4)O	Active	Active	Non-active	Active	Active	Non-active
5284599	CN(C)CC/C=C/1\C2=CC=CC=C2COC3=C1C=C(C=C3)CC(=O)O	Active	Active	Non-active	Active	Active	Non-active
5284543	CN1CC[C@]23[C@@H]4[C@H]1CC5=C2C(=C(C=C5)OC)O[C@H]3[C@H](CC4)O	Active	Active	Non-active	Active	Active	Non-active
5284538	CC(=O)[C@@]12[C@@H](C[C@@H]3[C@@]1(CC[C@H]4[C@H]3CCC5=CC(=O)CC[C@]45C)C)O[C@@](O2)(C)C6=CC=CC=C6	Active	Active	Non-active	Non-active	Active	Non-active
5284534	CC[C@@H]1[C@@]([C@@H]([C@H](C(=O)[C@@H](C[C@@]([C@@H](C([C@@H]([C@H](C(=O)O1)C)O[C@H]2C[C@@]([C@H]([C@@H](O2)C)O)(C)OC)C)O[C@H]3[C@@H]([C@H](C[C@H](O3)C)N(C)C)O)(C)OC)C)C)O)(C)O	Active	Active	Active	Active	Non-active	Active
5284514	CC1=CC=C(C=C1)/C(=C\CN2CCCC2)/C3=CC=CC(=N3)/C=C/C(=O)O	Active	Active	Non-active	Active	Active	Non-active
5284443	CNC[C@@H](C1=CC(=CC=C1)O)O	Active	Active	Non-active	Non-active	Active	Non-active
5284442	C1=CC=C(C=C1)/C(=C\CCCCC(=O)O)/C2=CN=CC=C2	Active	Active	Non-active	Non-active	Active	Non-active
5283454	CCCCCCCC/C=C\CCCCCCCC(=O)NCCO	Active	Active	Non-active	Active	Active	Non-active
5283344	CCCCCC(/C=C/C=O)O	Active	Active	Non-active	Non-active	Active	Non-active
5282481	CC(C)(C)C#C/C=C/CN(C)CC1=CC=CC2=CC=CC=C21	Active	Active	Non-active	Non-active	Active	Non-active
5282452	C1CC1C2=NC3=CC=CC=C3C(=C2/C=C/[C@H](C[C@H](CC(=O)O)O)O)C4=CC=C(C=C4)F	Active	Active	Non-active	Active	Active	Non-active
5282421	CCN(CC)C(=O)N[C@@H]1CN([C@@H]2CC3=CNC4=CC=CC(=C34)C2=C1)C	Active	Active	Non-active	Non-active	Active	Non-active
5282415	CCCCC[C@@H](/C=C/[C@H]1[C@@H](C[C@@H]([C@@H]1C/C=C\CCCC(=O)O)O)O)O	Active	Active	Non-active	Active	Non-active	Non-active
5282280	CCCCC/C=C\C/C=C\C/C=C\C/C=C\CCCC(=O)OC(CO)CO	Active	Active	Non-active	Non-active	Active	Non-active
5282054	C/C=C/C/C=C/CCC(=O)[C@@H]1[C@@H](O1)C(=O)N	Active	Active	Non-active	Non-active	Active	Non-active
5281847	CC1=C(C(=C(C(=C1O)C(=O)C)O)CC2=C(C3=C(C(=C2O)C(=O)/C=C/C4=CC=CC=C4)OC(C=C3)(C)C)O)O	Active	Active	Non-active	Active	Non-active	Active
5281792	C1=CC(=C(C=C1C[C@H](C(=O)O)OC(=O)/C=C/C2=CC(=C(C=C2)O)O)O)O	Active	Active	Non-active	Active	Active	Non-active
5281708	C1=CC(=CC=C1C2=COC3=C(C2=O)C=CC(=C3)O)O	Active	Active	Non-active	Active	Active	Non-active
5281707	C1=CC2=C(C=C1O)OC3=C2C(=O)OC4=C3C=CC(=C4)O	Active	Active	Non-active	Active	Active	Non-active
5281081	CCN(CC)C(=O)/C(=C/C1=CC(=C(C(=C1)O)O)[N+](=O)[O-])/C#N	Active	Active	Non-active	Non-active	Active	Non-active
5281075	CCCCC[C@@](C)(/C=C/[C@H]1[C@@H](C[C@@H]([C@@H]1C/C=C\CCCC(=O)O)O)O)O	Active	Active	Non-active	Active	Active	Non-active
5280878	CCCCC/C=C\C/C=C\C=C\C=C\[C@H]([C@H](CCCC(=O)O)O)SC[C@@H](C(=O)NCC(=O)O)N	Active	Active	Non-active	Active	Active	Non-active
5280754	CCC1C(=O)N(CC(=O)N(C(C(=O)NC(C(=O)N(C(C(=O)NC(C(=O)NC(C(=O)N(C(C(=O)N(C(C(=O)N(C(C(=O)N(C(C(=O)N1)C(C(C)C/C=C/C)O)C)C(C)C)C)CC(C)C)C)CC(C)C)C)C)C)CC(C)C)C)C(C)C)CC(C)C)C)C	Active	Active	Active	Active	Non-active	Active
5280531	CCCCCCCCCCCCCCCC(=O)OC/C=C(\C)/C=C/C=C(\C)/C=C/C1=C(CCCC1(C)C)C	Active	Active	Non-active	Non-active	Non-active	Non-active
5280493	CCCCC/C=C\C/C=C\C=C\C=C\[C@H]([C@H](CCCC(=O)O)O)SC[C@@H](C(=O)NCC(=O)O)NC(=O)CC[C@@H](C(=O)O)N	Active	Active	Non-active	Active	Active	Non-active
5280436	CCCCC/C=C\C/C=C\C/C=C\C/C=C\CCCC(=O)C(F)(F)F	Active	Active	Non-active	Non-active	Active	Non-active
5280383	CCCCC/C=C\C/C=C\C=C\C=C\[C@H]1[C@@H](O1)CCCC(=O)O	Active	Active	Non-active	Non-active	Active	Non-active
5280343	C1=CC(=C(C=C1C2=C(C(=O)C3=C(C=C(C=C3O2)O)O)O)O)O	Active	Active	Non-active	Active	Active	Non-active
3954028	C1=CN(C(=O)NC1=S)C2C(C(C(O2)CO)O)O	Active	Active	Non-active	Non-active	Non-active	Non-active
3651377	CC(C)C1=CC2=C(C=C1)N(C(=C2SC(C)(C)C)CC(C)(C)C(=O)O)CC3=CC=C(C=C3)Cl	Active	Active	Non-active	Active	Active	Non-active
4659569	CC1=CC=C(C=C1)C(=O)C2=CC(=C(C(=C2)O)O)[N+](=O)[O-]	Active	Active	Non-active	Non-active	Active	Non-active
3353976	C(CC(C(=O)O)N)CNC(=S)N	Active	Active	Non-active	Non-active	Active	Non-active
3246540	C[C@](CO)([C@H]([C@]12C(=O)N[C@](C(=C)CCO1)(C(=O)N2)O)O)O	Active	Active	Non-active	Active	Active	Non-active
3086599	CCNC(=O)[C@@H]1[C@H]([C@H]([C@@H](O1)N2C=NC3=C2N=C(N=C3N)NCCC4=CC=C(C=C4)CCC(=O)O)O)O	Active	Active	Non-active	Active	Active	Non-active
3084246	C1CN(CCN1)C2=CC=CC(=C2)C(F)(F)F	Active	Active	Non-active	Non-active	Active	Non-active
3040551	C[C@H]([C@H](C1=CC=C(C=C1)O)O)NCCC2=CC=C(C=C2)O	Active	Active	Non-active	Non-active	Active	Non-active
3037981	C1[C@@H](NC(=N[C@H]1O)N)[C@H]2C(=O)NC[C@@H](C(=O)N[C@H](C(=O)N[C@H](C(=O)N/C(=C\NC(=O)N)/C(=O)N2)CO)CO)NC(=O)C[C@H](CCCN)N	Active	Active	Active	Active	Non-active	Active
3035187	COC1=C(C=C2C(=C1)C(=NC=N2)NC3=CC(=CC=C3)Cl)OC	Active	Active	Non-active	Non-active	Active	Non-active
3034023	C1CCN[C@@H](C1)[C@H]2COC(O2)(C3=CC=CC=C3)C4=CC=CC=C4	Active	Active	Non-active	Non-active	Active	Non-active
3033968	CC[C@]12CC[C@H]3[C@H]([C@@H]1C=C[C@]2(C#C)O)CCC4=CC(=O)CC[C@H]34	Active	Active	Non-active	Active	Active	Non-active
3033825	C[C@@H]1CC(=O)NN=C1C2=CC=C(C=C2)NN=C(C#N)C#N	Active	Active	Non-active	Active	Active	Non-active
3022645	CCOC1=CC=CC=C1OC(C2CNCCO2)C3=CC=CC=C3	Active	Active	Non-active	Non-active	Active	Non-active
3021729	CC1CC(=O)NN=C1C2=CC=C(C=C2)N3C=CN=C3	Active	Active	Non-active	Non-active	Active	Non-active
3005572	CN(C)CCOC1=CC=C(C=C1)/C(=C(/CCCl)\C2=CC=CC=C2)/C3=CC=CC=C3	Active	Active	Non-active	Non-active	Active	Non-active
3005532	COC(=O)[C@H](CCSC)NC(=O)C1=C(C=C(C=C1)NC[C@H](CS)N)C2=CC=CC=C2	Active	Active	Non-active	Active	Active	Non-active
3000226	C[C@H]1[C@@H]2CC[C@]3([C@H]([C@]2(CC[C@H]1O)C)[C@@H](C[C@@H]\4[C@@]3(C[C@@H](/C4=C(/CCC=C(C)C)\C(=O)O)OC(=O)C)C)O)C	Active	Active	Active	Active	Non-active	Non-active
2999413	C[C@H]1CCC[C@@H](CCCCCC2=CC(=CC(=C2C(=O)O1)O)O)O	Active	Active	Non-active	Active	Active	Non-active
2730228	C1=CC(=CC(=C1)Cl)N=C(N)N=C(N)N	Active	Active	Non-active	Non-active	Active	Non-active
2724385	C[C@@H]1[C@H]([C@H](C[C@@H](O1)O[C@@H]2[C@H](O[C@H](C[C@@H]2O)O[C@@H]3[C@H](O[C@H](C[C@@H]3O)O[C@H]4CC[C@]5([C@@H](C4)CC[C@@H]6[C@@H]5C[C@H]([C@]7([C@@]6(CC[C@@H]7C8=CC(=O)OC8)O)C)O)C)C)C)O)O	Active	Active	Non-active	Active	Active	Non-active
1742129	CC1=C(C(=C2CC[C@](OC2=C1C)(C)CCC[C@@H](C)CCC[C@@H](C)CCCC(C)C)C)O	Active	Active	Non-active	Non-active	Active	Non-active
1712095	CCOC1=C(C=C(C=C1)/C=C\2/C3=CC(=C(C=C3CCN2)OCC)OCC)OCC	Active	Active	Non-active	Non-active	Active	Non-active
1549000	C1CN(CCN1CCOCC(=O)O)[C@H](C2=CC=CC=C2)C3=CC=C(C=C3)Cl	Active	Active	Non-active	Non-active	Active	Non-active
2761171	CCC1=NC=CC(=C1)C(=S)N	Active	Active	Non-active	Non-active	Active	Non-active
688561	CC[C@@H]([C@@H](C1=C2C=CC(=O)NC2=C(C=C1)O)O)NC(C)C	Active	Active	Non-active	Non-active	Active	Non-active
66448	CCN(CC)CCOC(=O)C(C1=CC=CC=C1)(C2=CC=CC=C2)O	Active	Active	Non-active	Non-active	Active	Non-active
66270	C1CCNC(C1)C2COC(O2)(C3=CC=CC=C3)C4=CC=CC=C4	Active	Active	Non-active	Non-active	Active	Non-active
66264	CCN[C@@H](C)CC1=CC(=CC=C1)C(F)(F)F	Active	Active	Non-active	Non-active	Active	Non-active
65853	C1CN(CCN1)C2=C3C(=CC=C2)OCCO3	Active	Active	Non-active	Non-active	Active	Non-active
65663	CCOC(=O)[C@@H]1[C@H](O1)C(=O)N[C@@H](CC(C)C)C(=O)NCCC(C)C	Active	Active	Non-active	Non-active	Active	Non-active
65494	CCC(=O)N(C1=CC=CC=C1)C2(CCN(CC2)CCC3=CC=CS3)COC	Active	Active	Non-active	Non-active	Active	Non-active
65483	CCC1(CCCCN(C1)C)C2=CC(=CC=C2)O	Active	Active	Non-active	Non-active	Active	Non-active
65373	COC1=C(C=CC(=C1)C[C@@H](CO)[C@@H](CC2=CC(=C(C=C2)O)OC)CO)O	Active	Active	Non-active	Active	Active	Non-active
65341	CCCC(C1=CC=CC=C1)(C2=CC=CC=C2)C(=O)OCCN(CC)CC	Active	Active	Non-active	Non-active	Active	Non-active
65327	CNCCCN1C2=CC=CC=C2CCC3=CC=CC=C31	Active	Active	Non-active	Non-active	Active	Non-active
65324	CC(CCC1=CC=C(C=C1)O)NCCC2=CC(=C(C=C2)O)O	Active	Active	Non-active	Active	Active	Non-active
65242	C([C@@H]1[C@H]([C@@H]([C@H](C(N1)O)O)O)O)O	Active	Active	Active	Non-active	Active	Non-active
65182	CCN(CC)C1=CC2=C(C=C1)N=C3C4=CC=CC=C4C(=O)C=C3O2	Active	Active	Non-active	Active	Active	Non-active
65180	CC1C(C(=O)NC(C(=O)N2CCCC2C(=O)N(CC(=O)N(C(C(=O)O1)C(C)C)C)C)C(C)C)NC(=O)C3=CC(=C(C4=C3N=C5C(=C(C(=O)C(=C5O4)C)N)C(=O)NC6C(OC(=O)C(N(C(=O)CN(C(=O)C7CCCN7C(=O)C(NC6=O)C(C)C)C)C)C(C)C)C)C)N	Active	Active	Non-active	Active	Active	Active
65079	C1=CC=C2C(=C1)C(=O)OC23C4=CC(=C(C=C4OC5=CC(=C(C=C35)CN(CC(=O)O)CC(=O)O)O)O)CN(CC(=O)O)CC(=O)O	Active	Active	Non-active	Active	Active	Non-active
65067	C1=CSC(=C1)C2=CC=C(S2)C3=CC=CS3	Active	Active	Non-active	Active	Active	Non-active
65064	C1[C@H]([C@H](OC2=CC(=CC(=C21)O)O)C3=CC(=C(C(=C3)O)O)O)OC(=O)C4=CC(=C(C(=C4)O)O)O	Active	Active	Non-active	Active	Active	Non-active
64971	CC(=C)[C@@H]1CC[C@]2([C@H]1[C@H]3CC[C@@H]4[C@]5(CC[C@@H](C([C@@H]5CC[C@]4([C@@]3(CC2)C)C)(C)C)O)C)C(=O)O	Active	Active	Non-active	Non-active	Active	Non-active
64951	C1=C2C=C(C=C(C2=C(C=C1S(=O)(=O)O)N)S(=O)(=O)O)S(=O)(=O)O	Active	Active	Non-active	Active	Active	Non-active
64764	CC(C)CC(C1(CCC1)C2=CC=C(C=C2)Cl)N(C)C	Active	Active	Non-active	Non-active	Active	Non-active
64761	CCC(=O)N(C1=CC=CC=C1)C2(CCN(CC2)CCN3C(=O)N(N=N3)CC)COC	Active	Active	Non-active	Non-active	Active	Non-active
64715	CC[C@H](C)C(=O)O[C@H]1CCC=C2[C@H]1[C@H]([C@H](C=C2)C)CC[C@@H]3C[C@H](CC(=O)O3)O	Active	Active	Active	Active	Active	Non-active
63103	C1=CC(=C(C(=C1)Cl)Cl)C2=C(C=C(C=C2)Cl)Cl	Active	Active	Non-active	Non-active	Active	Non-active
63002	CC(C)(C1=CC=C(C=C1)C(CCCN2CCC(CC2)C(C3=CC=CC=C3)(C4=CC=CC=C4)O)O)C(=O)O	Active	Active	Non-active	Active	Active	Non-active
62999	C1CC1N2C=C(C(=O)C3=CC(=C(C=C32)N4CCNCC4)F)C(=O)O	Active	Active	Non-active	Active	Active	Non-active
62923	CN(C)CC(C1=CC=C(C=C1)OC)C2(CCCCC2)O	Active	Active	Non-active	Non-active	Active	Non-active
62893	C1CC(C(NC1)CC(=O)CN2C=NC3=CC(=C(C=C3C2=O)Cl)Br)O	Active	Active	Non-active	Active	Active	Non-active
62881	CC(=O)N(CCCCCNC(=O)CCC(=O)N(CCCCCNC(=O)CCC(=O)N(CCCCCN)O)O)O	Active	Active	Non-active	Active	Non-active	Non-active
62857	CNCCC(C1=CC=CC=C1)OC2=CC=C(C=C2)C(F)(F)F	Active	Active	Non-active	Non-active	Active	Non-active
62279	CCC(=O)N(C1CCN(CC1C)CC(C2=CC=CC=C2)O)C3=CC=CC=C3	Active	Active	Non-active	Non-active	Active	Non-active
62156	CCC(=O)N(C1=CC=CC=C1)C2(CCN(CC2)CCC3=CC=CC=C3)C(=O)OC	Active	Active	Non-active	Non-active	Active	Non-active
61996	CCC(=O)N(C1CCN(CC1C)CCC2=CC=CC=C2)C3=CC=CC=C3	Active	Active	Non-active	Non-active	Active	Non-active
61100	C1=CC=C(C=C1)CCNN	Active	Active	Non-active	Non-active	Active	Non-active
60923	CC(C)(C)SC1=C(N(C2=C1C=C(C=C2)OCC3=NC4=CC=CC=C4C=C3)CC5=CC=C(C=C5)Cl)CC(C)(C)C(=O)O	Active	Active	Non-active	Active	Active	Non-active
60867	CC1CC(=O)NN=C1C2=CC=C(C=C2)NN=C(C#N)C#N	Active	Active	Non-active	Active	Active	Non-active
60857	CN(C)CCC1=CNC2=C1C=C(C=C2)C[C@H]3COC(=O)N3	Active	Active	Non-active	Non-active	Active	Non-active
60855	CC(=O)N[C@@H]1[C@H](C=C(O[C@H]1[C@@H]([C@@H](CO)O)O)C(=O)O)N=C(N)N	Active	Active	Non-active	Active	Non-active	Active
60815	CCC(=O)N(C1=CC=CC=C1)C2(CCN(CC2)CCC(=O)OC)C(=O)OC	Active	Active	Non-active	Non-active	Active	Non-active
60796	CN1C2=C(C=CC(=C2)C(C3=CC=C(C=C3)Cl)N4C=NC=N4)N=N1	Active	Active	Non-active	Non-active	Active	Non-active
60751	C1CC2=NC1=C(C3=CC=C(N3)C(=C4C=CC(=N4)C(=C5C=CC(=C2C6=CC(=CC=C6)O)N5)C7=CC(=CC=C7)O)C8=CC(=CC=C8)O)C9=CC(=CC=C9)O	Active	Active	Non-active	Active	Active	Non-active
60750	C1=CN(C(=O)N=C1N)[C@H]2C([C@@H]([C@H](O2)CO)O)(F)F	Active	Active	Non-active	Active	Non-active	Non-active
60693	CC(C)CN[C@H]1CCS(=O)(=O)C2=C1C=C(S2)S(=O)(=O)N	Active	Active	Non-active	Active	Active	Non-active
60608	C1=CC(=CN=C1)C(=O)NCCCC(=O)O	Active	Active	Non-active	Non-active	Active	Non-active
60594	CC(C)C[C@@H]([C@@H]([C@H](CC1CCCCC1)NC(=O)[C@H](CC2=CN=CN2)NC(=O)[C@H](CC3=CC=C(C=C3)OC)NC(=O)CC(C)(C)N)O)O	Active	Active	Non-active	Active	Active	Non-active
60561	CC(=O)SC[C@@H](CC1=CC=CC=C1)C(=O)NCC(=O)OCC2=CC=CC=C2	Active	Active	Non-active	Non-active	Active	Non-active
60198	C[C@]12CC[C@H]3[C@H]([C@@H]1CCC2=O)CC(=C)C4=CC(=O)C=C[C@]34C	Active	Active	Non-active	Active	Active	Non-active
59772	CNS(=O)(=O)CC1=CC2=C(C=C1)NC=C2CCN(C)C	Active	Active	Non-active	Non-active	Active	Non-active
57004	C(CC(C(F)F)(C(=O)O)N)CN	Active	Active	Non-active	Non-active	Active	Non-active
56971	C1CN(CCN1CCCCN2C(=O)C3=CC=CC=C3S2(=O)=O)C4=NC=CC=N4	Active	Active	Non-active	Non-active	Active	Non-active
56069	C[C@](CS(=O)(=O)C1=CC=C(C=C1)F)(C(=O)NC2=CC(=C(C=C2)C#N)C(F)(F)F)O	Active	Active	Non-active	Active	Active	Non-active
55918	C1CC(=O)NN=C1C2=CC=C(C=C2)N3C=CN=C3	Active	Active	Non-active	Active	Active	Non-active
55390	C1=CC2=CN=CN2C(=C1)CCCCCC(=O)O	Active	Active	Non-active	Non-active	Active	Non-active
55283	CCC(C)N1C(=O)N(C=N1)C2=CC=C(C=C2)N3CCN(CC3)C4=CC=C(C=C4)OC[C@H]5CO[C@](O5)(CN6C=NC=N6)C7=C(C=C(C=C7)Cl)Cl	Active	Active	Non-active	Active	Active	Non-active
54929	C1=CC=C(C=C1)CC2=CN(C(=O)NC2=O)COCCO	Active	Active	Non-active	Non-active	Active	Non-active
54688	CC[C@@H]1[C@@]([C@@H]([C@H](C(=O)[C@@H](C[C@@]([C@@H]([C@H]([C@@H]([C@H](C(=O)O1)C)OC2CC(C(C(O2)C)O)(C)OC)C)OC3C(C(CC(O3)C)N(C)C)O)(C)OC)C)C)O)(C)O	Active	Active	Active	Active	Non-active	Active
54445	C1CN2C[C@@H]([C@H]([C@@H]([C@H]2[C@H]1O)O)O)O	Active	Active	Non-active	Non-active	Active	Non-active
54384	C[C@@H]1CN(CC[C@@]1(C2=CC=CC=C2)C(=O)O)C3CCC(CC3)(C#N)C4=CC=C(C=C4)F	Active	Active	Non-active	Active	Active	Non-active
53708	CC1=C(NC(=O)N1)C(=O)C2=CC=C(C=C2)SC	Active	Active	Non-active	Non-active	Active	Non-active
53555	CC1=C(C2=CC=CC=C2N1CCC(=O)O)CN3C=CN=C3	Active	Active	Non-active	Non-active	Active	Non-active
53359	CN(CC(=O)O)C(=S)C1=CC=CC2=C1C=CC(=C2C(F)(F)F)OC	Active	Active	Non-active	Active	Active	Non-active
53232	CC[C@H](C)C(=O)O[C@H]1C[C@H](C=C2[C@H]1[C@H]([C@H](C=C2)C)CC[C@@H]3C[C@H](CC(=O)O3)O)C	Active	Active	Active	Active	Active	Non-active
52997	CC1=CC(=NC(=N1)NC(=O)NS(=O)(=O)C2=CC=CC=C2C(=O)OC)C	Active	Active	Non-active	Non-active	Active	Non-active
51763	C1CN=C(N1)NC2=C(C=C(C=C2Cl)N)Cl	Active	Active	Non-active	Non-active	Active	Non-active
51634	CCCCN1C[C@@H]([C@H]([C@@H]([C@H]1CO)O)O)O	Active	Active	Non-active	Non-active	Active	Non-active
50942	CN1C2=C(C(=O)N(C1=O)C)N(C=N2)CC3OCCO3	Active	Active	Non-active	Non-active	Non-active	Non-active
47445	C1=CC=C(C(=C1)C(=O)NC(=O)NC2=CC=C(C=C2)OC(F)(F)F)Cl	Active	Active	Non-active	Non-active	Active	Non-active
47318	CC1=C(SSC1=S)C2=NC=CN=C2	Active	Active	Non-active	Non-active	Active	Non-active
43157	C#CC1=CNC(=O)NC1=O	Active	Active	Non-active	Non-active	Non-active	Non-active
42923	CC1=NN(C(=O)C1)CCOC2=CC3=CC=CC=C3C=C2	Active	Active	Non-active	Non-active	Active	Non-active
41946	CCOC(=O)C1=C(C=C2C(=NNC(=O)C2=C1C)CO)C	Active	Active	Non-active	Non-active	Active	Non-active
41774	C[C@@H]1[C@H]([C@@H]([C@H]([C@H](O1)O[C@@H]2[C@H](O[C@@H]([C@@H]([C@H]2O)O)O[C@@H]3[C@H](OC([C@@H]([C@H]3O)O)O)CO)CO)O)O)N[C@H]4C=C([C@H]([C@@H]([C@H]4O)O)O)CO	Active	Active	Non-active	Active	Active	Non-active
41049	CCC1(CCCCN(C1)C)C2=CC(=CC=C2)O	Active	Active	Non-active	Non-active	Active	Non-active
40973	CC[C@]12CC(=C)[C@H]3[C@H]([C@@H]1CC[C@]2(C#C)O)CCC4=CCCC[C@H]34	Active	Active	Non-active	Active	Active	Non-active
40463	CC1([C@H]([C@H]1C(=O)OCC2=CC(=CC=C2)OC3=CC=CC=C3)C=C(Cl)Cl)C	Active	Active	Non-active	Non-active	Active	Non-active
40326	CC1(C(C1C(=O)OCC2=CC(=CC=C2)OC3=CC=CC=C3)C=C(Cl)Cl)C	Active	Active	Non-active	Non-active	Active	Non-active
39981	C([C@@H](C(=O)O)NC(=O)CP(=O)(O)O)C(=O)O	Active	Active	Non-active	Non-active	Non-active	Non-active
39941	CC(C1=CC2=C(C=C1)OC(=N2)C3=CC=C(C=C3)Cl)C(=O)O	Active	Active	Non-active	Non-active	Active	Non-active
39371	CC[C@@H](C(C[C@H](C)N(C)C)(C1=CC=CC=C1)C2=CC=CC=C2)OC(=O)C	Active	Active	Non-active	Non-active	Active	Non-active
39212	CC1=C(C=CC=C1NC1=C(C=CC=N1)C(O)=O)C(F)(F)F	Active	Active	Non-active	Non-active	Active	Non-active
38207	CNCC(CC12CCC(C3=CC=CC=C31)C4=CC=CC=C24)O	Active	Active	Non-active	Non-active	Active	Non-active
38101	C[C@](CC1=CC(=C(C=C1)O)O)(C(=O)O)NN	Active	Active	Non-active	Non-active	Active	Non-active
37274	CCN1C2=NC=C(C(=C2C=N1)NN=C(C)C)C(=O)OCC	Active	Active	Non-active	Active	Active	Non-active
36324	CC1=CC(=C(C=C1)N=CN(C)C=NC2=C(C=C(C=C2)C)C)C	Active	Active	Non-active	Non-active	Active	Non-active
35330	CC1=CC=C(C=C1)C(=O)OC2=C(C=C(C=C2)C(CNC(C)(C)C)O)OC(=O)C3=CC=C(C=C3)C	Active	Active	Non-active	Active	Active	Non-active
34521	CC1=CC(=CC=C1)N2CC(OC2=O)CO	Active	Active	Non-active	Non-active	Active	Non-active
33176	CC1=C(C2=C(N1CC(=O)O)C=C(C=C2)OC)C(=O)C3=CC=C(C=C3)Cl	Active	Active	Non-active	Active	Active	Non-active
32943	C1C(C(C(C(C1N)OC2C(C(C(C(O2)CN)O)O)O)O)OC3C(C(C(C(O3)CO)O)N)O)N	Active	Active	Active	Active	Non-active	Active
31765	CN1CCCCC1CCN2C3=CC=CC=C3SC4=C2C=C(C=C4)S(=O)(=O)C	Active	Active	Non-active	Non-active	Active	Non-active
31423	C1=CC2=C3C(=C1)C=CC4=CC=CC(=C43)C=C2	Active	Active	Non-active	Active	Active	Non-active
30322	C[C@@H]1[C@H]([C@H](C[C@@H](O1)O[C@@H]2[C@H](O[C@H](C[C@@H]2O)O[C@@H]3[C@H](O[C@H](C[C@@H]3O)O[C@H]4CC[C@]5([C@@H](C4)CC[C@@H]6[C@@H]5C[C@H]([C@]7([C@@]6(CCC7C8=CC(=O)OC8)O)C)O)C)C)C)O)O	Active	Active	Non-active	Active	Active	Non-active
30131	CCOC(=O)[C@@]1(CCC=C[C@H]1N(C)C)C2=CC=CC=C2	Active	Active	Non-active	Non-active	Active	Non-active
28620	C[C@@H]1[C@H]([C@H](C[C@@H](O1)O[C@H]2CC[C@]3([C@@H](C2)CC[C@@H]4[C@@H]3C[C@H]([C@]5([C@@]4(CC[C@@H]5C6=CC(=O)OC6)O)C)O)C)O)O[C@H]7C[C@@H]([C@@H]([C@H](O7)C)O[C@H]8C[C@@H]([C@@H]([C@H](O8)C)O[C@H]9[C@@H]([C@H]([C@@H]([C@H](O9)CO)O)O)O)O)O	Active	Active	Non-active	Active	Active	Non-active
28397	CCC(C(CC(C)N(C)C)(C1=CC=CC=C1)C2=CC=CC=C2)O	Active	Active	Non-active	Non-active	Active	Non-active
25447	C1[C@H](C2=C(NC=N1)N(C=N2)[C@H]3[C@@H]([C@@H]([C@H](O3)CO)O)O)O	Active	Active	Active	Active	Active	Active
25043	C1=C(C2=NON=C2C(=C1)Cl)[N+](=O)[O-]	Active	Active	Non-active	Active	Active	Non-active
24360	CC[C@@]1(C2=C(COC1=O)C(=O)N3CC4=CC5=CC=CC=C5N=C4C3=C2)O	Active	Active	Non-active	Active	Active	Non-active
23702	CCC(C(C1=CC(=C(C=C1)O)O)O)NC(C)C	Active	Active	Non-active	Non-active	Active	Non-active
21327	C1C(O1)COC2=CC=C(C=C2)[N+](=O)[O-]	Active	Active	Non-active	Non-active	Active	Non-active
21226	C1=CC2=C(C3=C(C=CC=N3)C=C2)N=C1	Active	Active	Non-active	Non-active	Active	Non-active
20049	C(CSCC(C(=O)O)N)N	Active	Active	Non-active	Active	Active	Non-active
19493	C1[C@H]([C@@H]1N)C2=CC=CC=C2	Active	Active	Non-active	Non-active	Active	Non-active
18794	C1=CC=C(C=C1)S(=O)(=O)NC2=NN=C(S2)S(=O)(=O)N	Active	Active	Non-active	Active	Active	Non-active
18730	C1=CC2=C(C=C1N=C=S)C(=O)OC23C4=C(C=C(C=C4)O)OC5=C3C=CC(=C5)O	Active	Active	Non-active	Active	Active	Non-active
18340	COC1=CC(=C(C=C1)OC)C(CNC(=O)CN)O	Active	Active	Non-active	Non-active	Active	Non-active
16886	C1C(C(OC1N2C=NC(=NC2=O)N)CO)O	Active	Active	Non-active	Non-active	Active	Non-active
16590	C=CCSSCC=C	Active	Active	Non-active	Non-active	Active	Non-active
16229	CCN(CCN1C(=NC2=C1C(=O)N(C(=O)N2C)C)CC3=CC=CC=C3)CCO	Active	Active	Non-active	Active	Active	Non-active
15897	CC(CC1=CC(=CC=C1)C(F)(F)F)N	Active	Active	Non-active	Non-active	Active	Non-active
15851	CNC1(CCCCC1=O)C2=CC=CC=C2Cl	Active	Active	Non-active	Non-active	Active	Non-active
15432	CCN(CC)C(=O)N1CCN(CC1)C	Active	Active	Non-active	Non-active	Active	Non-active
15165	CC(C12CC3CC(C1)CC(C3)C2)N	Active	Active	Non-active	Non-active	Active	Non-active
14707	CC1C2CC3=C(C1(CCN2CCC4=CC=CC=C4)C)C=C(C=C3)O	Active	Active	Non-active	Non-active	Active	Non-active
14385	C1=CC(=C(C=C1NC(=O)C2=CC(=CC(=C2O)Cl)Cl)Cl)Cl	Active	Active	Non-active	Non-active	Active	Non-active
14129	C1=CC(=CC=C1CC2=CC=NC=C2)[N+](=O)[O-]	Active	Active	Non-active	Non-active	Active	Non-active
14090	C1=CC=C(C=C1)C(=O)C=O	Active	Active	Non-active	Active	Active	Non-active
13765	CC[C@@]1(CC[C@@H]2[C@@]1(CC[C@H]3[C@H]2CCC4=CCCC[C@H]34)C)O	Active	Active	Non-active	Active	Active	Non-active
13089	C1=CC=C(C(=C1)C(C2=CC=C(C=C2)Cl)C(Cl)(Cl)Cl)Cl	Active	Active	Non-active	Non-active	Active	Non-active
12704	CCN(CC)C(=S)SC	Active	Active	Non-active	Non-active	Active	Non-active
12679	CN(C)P(=O)(N(C)C)N(C)C	Active	Active	Non-active	Non-active	Active	Non-active
12420	C[C@H]1[C@@H]([C@H]([C@H]([C@@H](O1)O[C@H]2C[C@H]([C@@]3(C4[C@@H](C[C@@]5([C@H](CC[C@@]5(C4CC[C@@]3(C2)O)O)C6=CC(=O)OC6)C)O)CO)O)O)O)O	Active	Active	Non-active	Active	Active	Non-active
12124	CC(=O)NC1=CC(=CC=C1)O	Active	Active	Non-active	Non-active	Active	Non-active
11579	CC(=O)CCC(=O)O	Active	Active	Non-active	Non-active	Active	Non-active
11352	C1=CC=C2C(=C1)C=C3C(=N2)C=CC=C3N	Active	Active	Non-active	Non-active	Active	Non-active
11273	C[C@]12CCC(=O)C(=C1CC[C@@H]3[C@@H]2CC[C@]4([C@H]3CCC4=O)C)O	Active	Active	Non-active	Active	Active	Non-active
11103	CC1=C(C2=CC3=NC(=CC4=NC(=CC5=C(C(=C(N5)C=C1N2)C(C)O)C)C(=C4CCC(=O)O)C)C(=C3C)CCC(=O)O)C(C)O	Active	Active	Non-active	Active	Active	Active
10819	CC(=C)C1CCC(=CC1)CO	Active	Active	Non-active	Non-active	Active	Non-active
10789	C1=CC=C(C(=O)C=C1)O	Active	Active	Non-active	Non-active	Non-active	Non-active
10634	C[C@]12CC[C@H]3[C@H]([C@@H]1CC[C@@H]2O)CC=C4[C@@]3(CC[C@@H](C4)O)C	Active	Active	Non-active	Active	Active	Non-active
10517	CCC(C(CC(C)N(C)C)(C1=CC=CC=C1)C2=CC=CC=C2)OC(=O)C	Active	Active	Non-active	Non-active	Active	Non-active
10439	C1=CC=NC(=C1)N	Active	Active	Non-active	Non-active	Active	Non-active
10367	C1=CC(=NC(=C1)C(=O)O)C(=O)O	Active	Active	Non-active	Non-active	Active	Non-active
10101	CCC(=O)C1(CCN(CC1)C)C2=CC(=CC=C2)O	Active	Active	Non-active	Non-active	Active	Non-active
9965	CC1=CC=C(C=C1)S(=O)(=O)F	Active	Active	Non-active	Non-active	Active	Non-active
9880	CC(=O)[C@]1(CC[C@@H]2[C@@]1(CC[C@H]3[C@H]2C=C(C4=CC(=O)[C@@H]5C[C@@H]5[C@]34C)Cl)C)OC(=O)C	Active	Active	Non-active	Non-active	Active	Non-active
9677	CCCCCCCCCC(=O)O[C@H]1CC[C@@H]2[C@@]1(CC[C@H]3[C@H]2CCC4=CC(=O)CC[C@H]34)C	Active	Active	Non-active	Non-active	Active	Non-active
9648	CC(CN1CCOCC1)C(C2=CC=CC=C2)(C3=CC=CC=C3)C(=O)N4CCCC4	Active	Active	Non-active	Active	Active	Non-active
9589	CC(=O)C1=CN=CC=C1	Active	Active	Non-active	Non-active	Active	Non-active
9426	CCC1CN2CCC3=CC(=C(C=C3C2CC1CC4C5=CC(=C(C=C5CCN4)OC)OC)OC)OC	Active	Active	Non-active	Active	Active	Non-active
9416	CCCCCCC(=O)O[C@H]1CC[C@@H]2[C@@]1(CC[C@H]3[C@H]2CCC4=CC(=O)CC[C@]34C)C	Active	Active	Non-active	Active	Active	Non-active
9324	CC(=O)[C@]1(CC[C@@H]2[C@@]1(CC[C@H]3[C@H]2C=C(C4=CC(=O)CC[C@]34C)Cl)C)OC(=O)C	Active	Active	Non-active	Non-active	Active	Non-active
9154	C1=CC=C2C(=C1)C3=CC=CC4=C3C2=CC=C4	Active	Active	Non-active	Active	Active	Non-active
8742	C1[C@H]([C@@H]([C@@H](C=C1C(=O)O)O)O)O	Active	Active	Non-active	Non-active	Active	Non-active
8643	C1=CC=C2C(=C1)C(=C3C=CC=CC3=N2)N	Active	Active	Non-active	Non-active	Active	Non-active
8111	C(CNCCN)N	Active	Active	Non-active	Active	Active	Non-active
7902	CN(C)CCO	Active	Active	Non-active	Non-active	Active	Non-active
7547	C1=CC(=CC=C1NC(=O)NC2=CC(=C(C=C2)Cl)Cl)Cl	Active	Active	Non-active	Non-active	Active	Non-active
7472	CN(C)C1=CC=C(C=C1)N	Active	Active	Non-active	Non-active	Active	Non-active
7410	CC(=O)C1=CC=CC=C1	Active	Active	Non-active	Non-active	Active	Non-active
7370	C1=CC=C(C=C1)S(=O)(=O)N	Active	Active	Non-active	Non-active	Active	Non-active
7013	C1=CC=C(C=C1)NC2=CC=CC3=CC=CC=C32	Active	Active	Non-active	Non-active	Active	Non-active
6942	C1=CC=C(C(=C1)C(=O)N)N	Active	Active	Non-active	Non-active	Active	Non-active
6755	C1=CC=C2C(=C1)C(=CC(=O)C2=O)O	Active	Active	Non-active	Non-active	Active	Non-active
6694	CCN(CC)C1=CC2=C(C=C1)C(=C3C=CC(=[N+](CC)CC)C=C3O2)C4=CC=CC=C4C(=O)O	Active	Active	Non-active	Active	Active	Non-active
6514	C(CS)C(=O)O	Active	Active	Non-active	Non-active	Active	Non-active
6471	CCC(=O)OC1(CCN(CC1C)C)C2=CC=CC=C2	Active	Active	Non-active	Non-active	Active	Non-active
6300	C[C@]12CC[C@H]3[C@H]([C@@H]1CC[C@]2(C)O)CCC4=CC(=O)C=C[C@]34C	Active	Active	Non-active	Active	Active	Non-active
6251	C([C@H]([C@H]([C@@H]([C@@H](CO)O)O)O)O)O	Active	Active	Non-active	Non-active	Active	Non-active
6199	C1=CC(=O)OC2=CC3=C(C=CO3)C=C21	Active	Active	Non-active	Active	Active	Non-active
6197	C[C@H]1C[C@@H](C(=O)[C@@H](C1)[C@@H](CC2CC(=O)NC(=O)C2)O)C	Active	Active	Active	Non-active	Non-active	Non-active
6089	CN(C)CCC1=CNC2=CC=CC=C21	Active	Active	Non-active	Non-active	Active	Non-active
6084	COC1=C(C=C(C=C1)CC2=NC=CC3=CC(=C(C=C32)OC)OC)OC	Active	Active	Non-active	Active	Active	Non-active
6013	C[C@]12CC[C@H]3[C@H]([C@@H]1CC[C@@H]2O)CCC4=CC(=O)CC[C@]34C	Active	Active	Non-active	Active	Active	Non-active
6010	C[C@]12CCC(=O)C=C1CC[C@@H]3[C@@H]2CC[C@]4([C@H]3CC[C@]4(C)O)C	Active	Active	Non-active	Active	Active	Non-active
5953	COC1=CC2=C(C=CN=C2C=C1)[C@@H]([C@H]3CC4CCN3C[C@@H]4C=C)O	Active	Active	Non-active	Active	Active	Non-active
5944	C[C@@]12[C@H]3CC[C@@H]([C@@]1(C(=O)OC2=O)C)O3	Active	Active	Non-active	Non-active	Non-active	Active
5905	C1[C@@H]([C@H](O[C@H]1N2C=C(C(=O)NC2=O)I)CO)O	Active	Active	Non-active	Non-active	Active	Non-active
5858	CC[C@@]1(CC[C@@H]2[C@@]1(CC[C@H]3[C@H]2CCC4=CC(=O)CC[C@H]34)C)O	Active	Active	Non-active	Active	Active	Non-active
5761	CCN(CC)C(=O)[C@H]1CN([C@@H]2CC3=CNC4=CC=CC(=C34)C2=C1)C	Active	Active	Non-active	Active	Active	Non-active
5750	CCOC(=O)C1(CCN(CC1)C)C2=CC=CC=C2	Active	Active	Non-active	Non-active	Active	Non-active
5731	CN(C)CCC1=CNC2=C1C=C(C=C2)CC3COC(=O)N3	Active	Active	Non-active	Non-active	Active	Non-active
5724	C1=CC2=C(C=C1Cl)N(C(=O)N(C2=O)CC3=C(C=C(C=C3)Br)F)CC(=O)O	Active	Active	Non-active	Active	Active	Non-active
5712	C1=CC=C(C=C1)CN2C3=CC=CC=C3C(=N2)C4=CC=C(O4)CO	Active	Active	Non-active	Active	Active	Non-active
5689	CC1=C(C2=C3N1C(COC3=CC=C2)CN4CCOCC4)C(=O)C5=CC=CC6=CC=CC=C65	Active	Active	Non-active	Active	Active	Non-active
5665	C=CC(CCC(=O)O)N	Active	Active	Non-active	Non-active	Active	Non-active
5663	COC1=C(C=C(C=C1)C(=O)N2CCN(CC2)C3=CC4=C(C=C3)NC(=O)CC4)OC	Active	Active	Non-active	Active	Active	Non-active
5585	CC1=CC(=O)OC2=C1C=C3C=C(OC3=C2C)C	Active	Active	Non-active	Non-active	Active	Non-active
5564	C1=CC(=C(C=C1Cl)O)OC2=C(C=C(C=C2)Cl)Cl	Active	Active	Non-active	Non-active	Active	Non-active
5530	C1C(C1N)C2=CC=CC=C2	Active	Active	Non-active	Non-active	Active	Non-active
5502	CCC1C(=NN=C(C2=CC(=C(C=C12)OC)OC)C3=CC(=C(C=C3)OC)OC)C	Active	Active	Non-active	Active	Active	Non-active
5447	C(CSCCO)O	Active	Active	Non-active	Non-active	Active	Non-active
5405	CC(C)(C)C1=CC=C(C=C1)C(CCCN2CCC(CC2)C(C3=CC=CC=C3)(C4=CC=CC=C4)O)O	Active	Active	Non-active	Non-active	Active	Non-active
5312	CC(=O)CC(=O)CCC(=O)O	Active	Active	Non-active	Non-active	Active	Non-active
5311	C1=CC=C(C=C1)NC(=O)CCCCCCC(=O)NO	Active	Active	Non-active	Active	Active	Non-active
5278	C1=CC=C2C(=C1)C(=NN(C2=O)CC3=C(C=C(C=C3)Br)F)CC(=O)O	Active	Active	Non-active	Active	Active	Non-active
5270	C1CC(OC1)N2C=NC3=C2N=CN=C3N	Active	Active	Non-active	Non-active	Active	Non-active
5259	C(CCN(CCCN)N(N=O)O)CNCCCN	Active	Active	Non-active	Active	Active	Non-active
5240	C(C(=O)O)I	Active	Active	Non-active	Non-active	Active	Non-active
5228	C1CSC2=NC(=C(N21)C3=CC=NC=C3)C4=CC=C(C=C4)F	Active	Active	Non-active	Active	Active	Non-active
5212	CCCC1=NN(C2=C1NC(=NC2=O)C3=C(C=CC(=C3)S(=O)(=O)N4CCN(CC4)C)OCC)C	Active	Active	Non-active	Active	Active	Non-active
5186	C1=CC2=C3C(=C1)C(=O)N(C(=O)C3=CC=C2)CCCCCC(=O)NO	Active	Active	Non-active	Active	Active	Non-active
5145	C1=CC=C(C(=C1)CO)OC2C(C(C(C(O2)CO)O)O)O	Active	Active	Non-active	Non-active	Non-active	Non-active
5141	CCCCCCSCC(C(=O)NCC(=O)O)NC(=O)CCC(C(=O)O)N	Active	Active	Non-active	Active	Active	Non-active
5129	C1=CC(=CC=C1CSC2=NC=NC3=C2N=CN3C4C(C(C(O4)CO)O)O)[N+](=O)[O-]	Active	Active	Non-active	Active	Active	Non-active
5087	CCCCOC1=C(C=CC(=C1)CC2CNC(=O)N2)OC	Active	Active	Non-active	Non-active	Active	Non-active
5081	CCOC(=O)C1=C2CN(C(=O)C3=C(N2C=N1)C=CC(=C3)N=[N+]=[N-])C	Active	Active	Non-active	Active	Active	Non-active
5063	C1CCC(=NOC(=O)NCCCCCCNC(=O)ON=C2CCCCC2)CC1	Active	Active	Non-active	Active	Active	Non-active
5059	CCCCCC(C1=CC(=CC=C1)OCC2=NC3=CC=CC=C3C=C2)O	Active	Active	Non-active	Active	Active	Non-active
4971	CC1=C(C2=CC3=C(C(=C(N3)C=C4C(=C(C(=N4)C=C5C(=C(C(=N5)C=C1N2)C)CCC(=O)O)CCC(=O)O)C)C=C)C)C=C	Active	Active	Non-active	Active	Active	Non-active
4845	CC(C)(C)NCC(C1=NC(=C(C=C1)O)CO)O	Active	Active	Non-active	Non-active	Active	Non-active
4807	C1=CC=C(C(=C1)C=O)C=O	Active	Active	Non-active	Non-active	Active	Non-active
4794	CP(=O)(CCC(C(=O)O)N)O	Active	Active	Non-active	Non-active	Active	Non-active
4740	CC(=O)CCCCN1C(=O)C2=C(N=CN2C)N(C1=O)C	Active	Active	Non-active	Non-active	Active	Non-active
4736	CC1C2CC3=C(C1(CCN2CC=C(C)C)C)C=C(C=C3)O	Active	Active	Non-active	Non-active	Active	Non-active
4705	COC1=C(C=C2C(=C1)C(=NC=N2)NC3=CC(=CC=C3)Br)OC	Active	Active	Non-active	Active	Active	Non-active
4671	CCCCCCCCCCCCCCCC(=O)NCCO	Active	Active	Non-active	Active	Active	Non-active
4652	C1=CC(=CC=C1CC(C(=O)O)N)Cl	Active	Active	Non-active	Non-active	Active	Non-active
4628	CCN1C=C(C(=O)C2=CC3=C(C=C21)OCO3)C(=O)O	Active	Active	Non-active	Active	Active	Non-active
4592	CN1C=NC2=C1N=C(N=C2NCC3=CC=CC=C3)NCCO	Active	Active	Non-active	Non-active	Active	Non-active
4585	CC1=CC2=C(NC3=CC=CC=C3N=C2S1)N4CCN(CC4)C	Active	Active	Non-active	Non-active	Active	Non-active
4553	CS(=O)(=O)NC1=C(C=C(C=C1)[N+](=O)[O-])OC2CCCCC2	Active	Active	Non-active	Non-active	Active	Non-active
4518	NCCN(CCN)N([O-])N=O	Active	Active	Non-active	Non-active	Active	Non-active
4493	CC1(C(=O)N(C(=O)N1)C2=CC(=C(C=C2)[N+](=O)[O-])C(F)(F)F)C	Active	Active	Non-active	Non-active	Active	Non-active
4488	C1=CC(=CC(=C1)NC2=C(C=CC=N2)C(=O)O)C(F)(F)F	Active	Active	Non-active	Non-active	Active	Non-active
4440	CNS(=O)(=O)CCC1=CC2=C(C=C1)NC=C2C3CCN(CC3)C	Active	Active	Non-active	Active	Active	Non-active
4395	CC(=NCCCC(C(=O)O)N)N	Active	Active	Non-active	Active	Active	Non-active
4380	CN(CCCOC1=C(C=C(C=C1)Cl)Cl)CC#C	Active	Active	Non-active	Non-active	Active	Non-active
4373	CC(C)C(C(=O)CCl)NC(=O)C1CCCN1C(=O)C(C)NC(=O)C(C)NC(=O)CCC(=O)OC	Active	Active	Non-active	Active	Active	Non-active
4362	CCN1C(=O)C=CC1=O	Active	Active	Non-active	Non-active	Non-active	Non-active
4266	C1=C(ONC1=O)CN	Active	Active	Non-active	Active	Active	Non-active
4235	C1COCCN1CCNC(=O)C2=CC=C(C=C2)Cl	Active	Active	Non-active	Non-active	Active	Non-active
4213	C1=NC(=C(N1C2C(C(C(O2)CO)O)O)O)C(=O)N	Active	Active	Non-active	Active	Active	Non-active
4174	CC(C)(C1=CN=CC=C1)C(=O)C2=CN=CC=C2	Active	Active	Non-active	Non-active	Active	Non-active
4114	COC1=C2C(=CC3=C1OC=C3)C=CC(=O)O2	Active	Active	Non-active	Active	Active	Non-active
4076	COC1=CC(=CC(=C1OC)OC)CCN	Active	Active	Non-active	Non-active	Active	Non-active
4049	CNCC(C(C(C(CO)O)O)O)O	Active	Active	Non-active	Active	Non-active	Non-active
3994	CN(C)C1=CC=C(C=C1)C(=O)NCCCCCCC(=O)NO	Active	Active	Non-active	Non-active	Active	Non-active
3976	C1=CC=C(C=C1)NC2=CC(=O)C3=C(C2=O)C=CC=N3	Active	Active	Non-active	Non-active	Active	Non-active
3962	CCC(C)C(=O)OC1CC(C=C2C1C(C(C=C2)C)CCC3CC(CC(=O)O3)O)C	Active	Active	Non-active	Active	Active	Non-active
3957	CCOC(=O)N1CCC(=C2C3=C(CCC4=C2N=CC=C4)C=C(C=C3)Cl)CC1	Active	Active	Non-active	Non-active	Active	Non-active
3899	CC1=C(C=NO1)C(=O)NC2=CC=C(C=C2)C(F)(F)F	Active	Active	Non-active	Non-active	Active	Non-active
3894	C1=CC=C(C(=C1)CN(CC2=C(C=CC(=C2)O)O)C3=CC(=C(C=C3)O)C(=O)O)O	Active	Active	Non-active	Active	Active	Non-active
3838	CN(C(CC1=CC=C(C=C1)OS(=O)(=O)C2=CC=CC3=C2C=CN=C3)C(=O)N4CCN(CC4)C5=CC=CC=C5)S(=O)(=O)C6=CC=CC7=C6C=CN=C7	Active	Active	Non-active	Active	Active	Non-active
3825	CC(C1=CC=CC(=C1)C(=O)C2=CC=CC=C2)C(=O)O	Active	Active	Non-active	Non-active	Active	Non-active
3806	C1=CC2=C(C(=O)C=CC2=O)C(=C1)O	Active	Active	Non-active	Non-active	Active	Non-active
3793	CCC(C)N1C(=O)N(C=N1)C2=CC=C(C=C2)N3CCN(CC3)C4=CC=C(C=C4)OCC5COC(O5)(CN6C=NC=N6)C7=C(C=C(C=C7)Cl)Cl	Active	Active	Non-active	Active	Active	Non-active
3759	CC1=CC(=NO1)C(=O)NNCC2=CC=CC=C2	Active	Active	Non-active	Non-active	Active	Non-active
3758	CC(C)CN1C2=C(C(=O)N(C1=O)C)NC=N2	Active	Active	Non-active	Non-active	Active	Non-active
3729	CC(C)NC(C)CC1=CC=C(C=C1)I	Active	Active	Non-active	Non-active	Active	Non-active
3727	C(C(=O)N)I	Active	Active	Non-active	Non-active	Active	Non-active
3715	CC1=C(C2=C(N1C(=O)C3=CC=C(C=C3)Cl)C=CC(=C2)OC)CC(=O)O	Active	Active	Non-active	Active	Active	Non-active
3712	C1=CC=C2C(=C1)C(=CN2)CO	Active	Active	Non-active	Non-active	Active	Non-active
3687	C1C(C(OC1N2C=C(C(=O)NC2=O)I)CO)O	Active	Active	Non-active	Non-active	Active	Non-active
3677	CC(C)(CC1=CC=CC=C1)NC	Active	Active	Non-active	Non-active	Non-active	Non-active
3671	CC(C)C1=NN2C=CC=CC2=C1C(=O)C(C)C	Active	Active	Non-active	Non-active	Active	Non-active
3614	CN1C=C(N=C1)CCN	Active	Active	Non-active	Non-active	Active	Non-active
3542	CC1CNCCN1S(=O)(=O)C2=CC=CC3=C2C=CN=C3	Active	Active	Non-active	Non-active	Active	Non-active
3519	C1=CC(=C(C(=C1)Cl)CC(=O)N=C(N)N)Cl	Active	Active	Non-active	Non-active	Active	Non-active
3496	C(C(=O)O)NCP(=O)(O)O	Active	Active	Non-active	Non-active	Non-active	Non-active
3452	C#CC(CCC(=O)O)N	Active	Active	Non-active	Active	Active	Non-active
3446	C1CCC(CC1)(CC(=O)O)CN	Active	Active	Non-active	Non-active	Non-active	Non-active
3433	CC1=NC2=C(N1)C(=O)N(C(=O)N2CC3=CC=CO3)C	Active	Active	Non-active	Non-active	Active	Non-active
3397	CC(C)C(=O)NC1=CC(=C(C=C1)[N+](=O)[O-])C(F)(F)F	Active	Active	Non-active	Non-active	Active	Non-active
3365	C1=CC(=C(C=C1F)F)C(CN2C=NC=N2)(CN3C=NC=N3)O	Active	Active	Non-active	Non-active	Active	Non-active
3345	CCC(=O)N(C1CCN(CC1)CCC2=CC=CC=C2)C3=CC=CC=C3	Active	Active	Non-active	Non-active	Active	Non-active
3335	C1=CC=C(C=C1)C2=CC=C(C=C2)C(=O)CCC(=O)O	Active	Active	Non-active	Non-active	Active	Non-active
3278	CCC(=C)C(=O)C1=C(C(=C(C=C1)OCC(=O)O)Cl)Cl	Active	Active	Non-active	Non-active	Active	Non-active
3259	C1=CC=C2C(=C1)C(=O)OC23C4=CC(=C(C(=C4OC5=C(C(=C(C=C35)I)O)I)I)O)I	Active	Active	Non-active	Active	Active	Non-active
3229	CCN1C=C(C(=O)C2=CC(=C(N=C21)N3CCNCC3)F)C(=O)O	Active	Active	Non-active	Active	Active	Non-active
3206	CCCCCCC(C(C)O)N1C=NC2=C1N=CN=C2N	Active	Active	Non-active	Non-active	Active	Non-active
3197	CC1C(=O)N(C2CSC(C(C(=O)N(C(C(=O)OCC(C(=O)N1)NC(=O)C3=NC4=CC=CC=C4N=C3)C(C)C)C)N(C(=O)C(NC(=O)C(COC(=O)C(N(C2=O)C)C(C)C)NC(=O)C5=NC6=CC=CC=C6N=C5)C)C)SC)C	Active	Active	Active	Active	Non-active	Active
3189	CCOC(=O)C1C(O1)C(=O)NC(CC(C)C)C(=O)NCCC(C)C	Active	Active	Non-active	Non-active	Active	Non-active
3182	CN1C2=C(C(=O)N(C1=O)C)N(C=N2)CC(CO)O	Active	Active	Non-active	Non-active	Active	Non-active
3177	CS(=O)(=O)C1=CC=C(C=C1)C2=C(SC(=C2)Br)C3=CC=C(C=C3)F	Active	Active	Non-active	Active	Active	Non-active
3126	CCCCCCCCCCCCCCCC(C(CO)N)O	Active	Active	Non-active	Active	Active	Non-active
3117	CCN(CC)C(=S)SSC(=S)N(CC)CC	Active	Active	Non-active	Non-active	Active	Non-active
3107	CCC(C)C(C(=O)N1CCCC1C(=O)NC(C(C)CC)C(=O)O)N	Active	Active	Non-active	Active	Non-active	Non-active
3102	C1=CC=C(C=C1)C(=O)C2=CC=CC=C2	Active	Active	Non-active	Non-active	Active	Non-active
3061	CC1C(C(CC(O1)OC2C(OC(CC2O)OC3C(OC(CC3O)OC4CCC5(C(C4)CCC6C5CCC7(C6(CCC7C8=CC(=O)OC8)O)C)C)C)C)O)O	Active	Active	Non-active	Active	Active	Non-active
3059	C1=CC(=C(C=C1C2=C(C=C(C=C2)F)F)C(=O)O)O	Active	Active	Non-active	Non-active	Active	Non-active
3038	C1=C(C=C(C(=C1S(=O)(=O)N)Cl)Cl)S(=O)(=O)N	Active	Active	Non-active	Active	Active	Non-active
3012	CC1=C(C(=O)N2C=CSC2=N1)CCN3CCC(=C(C4=CC=CC=C4)C5=CC=C(C=C5)F)CC3	Active	Active	Non-active	Non-active	Active	Non-active
2984	CCCCN1C2=C(C(=O)N(C1=O)CCCC)N(C=N2)CC(=O)C	Active	Active	Non-active	Active	Active	Non-active
2944	C1=C(NC(=NC1=O)N)N	Active	Active	Non-active	Non-active	Active	Non-active
2859	C1(C(C(C2C(C1O)O2)O)O)O	Active	Active	Non-active	Non-active	Non-active	Active
2854	CCC(C)C(=O)OC1CCC=C2C1C(C(C=C2)C)CCC3CC(CC(=O)O3)O	Active	Active	Non-active	Active	Active	Non-active
2812	C1=CC=C(C=C1)C(C2=CC=CC=C2)(C3=CC=CC=C3Cl)N4C=CN=C4	Active	Active	Non-active	Non-active	Active	Non-active
2806	COC(=O)C(C1=CC=CC=C1Cl)N2CCC3=C(C2)C=CS3	Active	Active	Non-active	Non-active	Active	Non-active
2769	COC1CN(CCC1NC(=O)C2=CC(=C(C=C2OC)N)Cl)CCCOC3=CC=C(C=C3)F	Active	Active	Non-active	Active	Active	Non-active
2765	C1CC1C2=CC=CC=C2OCC3=NCCN3	Active	Active	Non-active	Non-active	Active	Non-active
2754	C1CCC(CC1)N2C(=NN=N2)CCCCOC3=CC4=C(C=C3)NC(=O)CC4	Active	Active	Non-active	Non-active	Active	Non-active
2753	CN(C1CCCCC1)C(=O)CCCOC2=CC3=C(C=C2)NC(=O)C=C3	Active	Active	Non-active	Active	Active	Non-active
2592	C1CN2CC(C(C(C2C1O)O)O)O	Active	Active	Non-active	Non-active	Active	Non-active
2581	CC(C1=CC2=C(C=C1)C3=C(N2)C=CC(=C3)Cl)C(=O)O	Active	Active	Non-active	Non-active	Active	Non-active
2533	CC(CC1=C(C(=C2C(=O)C=C(C3=C4C(=CC(=O)C5=C(C(=C(C(=C45)C1=C32)CC(C)OC(=O)OC6=CC=C(C=C6)O)OC)O)OC)OC)O)OC)OC(=O)C7=CC=CC=C7	Active	Active	Non-active	Active	Active	Active
2464	CC12CCC(CC1CCC3C2CCC4(C3(CCC4C5=COC(=O)C=C5)O)C)O	Active	Active	Non-active	Active	Active	Non-active
2435	C1CN=C(N1)NC2=C(C3=NC=CN=C3C=C2)Br	Active	Active	Non-active	Non-active	Active	Non-active
2404	CN1C=C(C2=CC=CC=C21)C3=C(C(=O)NC3=O)C4=C5CC(CCN5C6=CC=CC=C64)CN	Active	Active	Non-active	Active	Active	Non-active
2374	CC(C)(C)C1=CC(=C(C=C1O)C(C)(C)C)O	Active	Active	Non-active	Non-active	Active	Non-active
2371	CC(=C)C1CCC2(C1C3CCC4C5(CCC(C(C5CCC4(C3(CC2)C)C)(C)C)O)C)C(=O)O	Active	Active	Non-active	Non-active	Active	Non-active
2355	COC1=C2C=CC(=O)OC2=CC3=C1C=CO3	Active	Active	Non-active	Active	Active	Non-active
2327	C1=CC(=C(C(=C1CNNC(=O)C(CO)N)O)O)O	Active	Active	Non-active	Active	Non-active	Non-active
2247	COC1=CC=C(C=C1)CCN2CCC(CC2)NC3=NC4=CC=CC=C4N3CC5=CC=C(C=C5)F	Active	Active	Non-active	Active	Active	Non-active
2244	CC(=O)OC1=CC=CC=C1C(=O)O	Active	Active	Non-active	Non-active	Active	Non-active
2210	CC12CCC(C(C1CCC3C24CCC(C(C3)C4)(CO)O)(C)CO)O	Active	Active	Active	Active	Active	Active
2196	COC1=CC=C(C=C1)C(=O)N2CCCC2=O	Active	Active	Non-active	Non-active	Active	Non-active
2170	C1CN(CCN1)C2=NC3=CC=CC=C3OC4=C2C=C(C=C4)Cl	Active	Active	Non-active	Non-active	Active	Non-active
2146	C(=NN)(N)N	Active	Active	Non-active	Active	Active	Non-active
2120	C1=CC2=C3C(=C1)C(=O)N(C(=O)C3=CC=C2)CC(=O)O	Active	Active	Non-active	Active	Active	Non-active
2116	CC1=C(C(=C2CCC(OC2=C1C)(C)CCCC(C)CCCC(C)CCCC(C)C)C)O	Active	Active	Non-active	Non-active	Active	Non-active
2063	COC1=CC=C(C=C1)C=C(C#N)C#N	Active	Active	Non-active	Non-active	Active	Non-active
2061	C1=C(C=C(C(=C1O)O)O)C=C(C#N)C#N	Active	Active	Non-active	Active	Active	Non-active
2046	C1=CC(=C(C=C1C=C(C#N)C#N)O)[N+](=O)[O-]	Active	Active	Non-active	Active	Active	Non-active
2040	CC1=CC=CC=C1N2C(=NC3=C(C2=O)C=C(C=C3)N)CF	Active	Active	Non-active	Non-active	Active	Non-active
2002	CC(=O)NC(CC1=CNC2=CC=CC=C21)C(=O)O	Active	Active	Non-active	Non-active	Active	Non-active
1990	CC(=O)NO	Active	Active	Non-active	Non-active	Active	Non-active
1967	CC1=C(C(=O)C(=C(C1=O)C)CCCCC#CCCCC#CCO)C	Active	Active	Non-active	Non-active	Active	Non-active
1917	CN1C2=C(C(=O)N(C1=O)C)NC(=N2)C3CCCC3	Active	Active	Non-active	Non-active	Active	Non-active
1832	CN(C)CCC1=CNC2=C1C=C(C=C2)OC	Active	Active	Non-active	Non-active	Active	Non-active
1830	C1=C(C2=C(N1C3C(C(C(O3)CO)O)O)N=CN=C2N)I	Active	Active	Non-active	Active	Active	Non-active
1805	C1=NC(=NC(=O)N1C2C(C(C(O2)CO)O)O)N	Active	Active	Non-active	Active	Active	Non-active
1676	CCCN1C2=C(C(=O)NC1=O)NC=N2	Active	Active	Non-active	Non-active	Active	Non-active
1639	C1=NNC(=N1)N	Active	Active	Non-active	Active	Active	Non-active
1613	C1=CC=C2C(=C1)C(=NN(C2=O)CC3=NC4=C(S3)C=CC(=C4)C(F)(F)F)CC(=O)O	Active	Active	Non-active	Active	Active	Non-active
1606	C(CN(CCN)N(N=O)O)N	Active	Active	Non-active	Non-active	Active	Non-active
1456	C1=CC=C2C(=C1)N=CC3=NOC(=O)N23	Active	Active	Non-active	Non-active	Active	Non-active
1405	C#CCN(CC1=CC2=C(C=C1)NC(=NC2=O)N)C3=CC=C(C=C3)C(=O)NC(CCC(=O)O)C(=O)O	Active	Active	Non-active	Active	Active	Non-active
1330	CCCN1C2=C(C(=O)N(C1=O)CCC)NC(=N2)C3=CC=C(C=C3)S(=O)(=O)O	Active	Active	Non-active	Active	Active	Non-active
1302	CC(C1=CC2=C(C=C1)C=C(C=C2)OC)C(=O)O	Active	Active	Non-active	Non-active	Active	Non-active
1229	CC(CC1=CC(=C(C=C1OC)I)OC)N	Active	Active	Non-active	Non-active	Active	Non-active
1220	CCCN(CCC)C1CCC2=C(C1)C(=CC=C2)O	Active	Active	Non-active	Non-active	Active	Non-active
1188	C1=NC2=C(N1)C(=O)NC(=O)N2	Active	Active	Non-active	Non-active	Active	Non-active
1065	COC1=CC2=C(C=CN=C2C=C1)C(C3CC4CCN3CC4C=C)O	Active	Active	Non-active	Active	Active	Non-active
1048	C1=CNN=C1	Active	Active	Non-active	Active	Active	Non-active
795	C1=CN=CN1	Active	Active	Non-active	Active	Active	Non-active
763	C(C(=O)O)N=C(N)N	Active	Active	Non-active	Active	Active	Non-active
385	C(CCC(=O)O)CCC(=O)O	Active	Active	Non-active	Non-active	Active	Non-active
378	C1=CC(=CC=C1[N+](=O)[O-])OP(=O)(O)O	Active	Active	Non-active	Non-active	Non-active	Non-active
286	C(C(=O)O)ON	Active	Active	Non-active	Active	Non-active	Non-active
258	CN(CCC(CC(=O)NC1C=CC(OC1C(=O)O)N2C=CC(=NC2=O)N)N)C(=N)N	Active	Active	Non-active	Active	Active	Non-active
244	C1=CC=C(C=C1)CO	Active	Active	Non-active	Non-active	Non-active	Non-active
149	CSCC1C(C(C(O1)N2C=NC3=C2N=CN=C3N)O)O	Active	Active	Non-active	Active	Active	Non-active
6	C1=CC(=C(C=C1[N+](=O)[O-])[N+](=O)[O-])Cl	Active	Active	Non-active	Non-active	Active	Non-active
56840834	CC1=CC(=CC=C1)N(C)C(=S)OC2=CC3=CC=CC=C3C=C2	Active	Non-active	Active	Non-active	Active	Non-active
15955863	C(C[C@@H](C(=O)N[C@@H](CCC(=O)O)C(=O)N[C@@H](CCC(=O)O)C(=O)N[C@@H](CCC(=O)O)C(=O)N[C@@H](CC(=O)O)C(=O)N[C@@H](CC(=O)O)C(=O)N[C@@H](CCCN=C(N)N)C(=O)O)NC(=O)[C@H](CS)NC(=O)[C@H](CCC(=O)N)NC(=O)[C@H](CCC(=O)O)N)CN=C(N)N	Active	Non-active	Non-active	Active	Non-active	Active
16130919	C[C@H]([C@@H](C(=O)N[C@@H](C)C(=O)N[C@@H](C)C(=O)NCC(=O)N[C@@H](CCCNC(=N)N)C(=O)N[C@@H](CC1=CC=CC=C1)C(=O)N[C@@H](C(C)C)C(=O)O)NC(=O)CNC(=O)CNC(=O)[C@H](C(C)C)NC(=O)[C@H]([C@@H](C)O)NC(=O)[C@H](CCSC)NC(=O)[C@H](CC2=CC=CC=C2)NC(=O)[C@H](CC3=CC=CC=C3)NC(=O)[C@H](C(C)C)NC(=O)[C@H](CCCNC(=N)N)NC(=O)[C@@H]4CCCN4C(=O)[C@H](CC(=O)N)NC(=O)[C@@H]5CCCN5)O	Active	Non-active	Non-active	Active	Non-active	Non-active
114680	CC1=C[C@@H]2[C@](CC1)(C3([C@@H](C[C@H](C34CO4)O2)O)C)C	Active	Non-active	Non-active	Non-active	Active	Non-active
6711209	CC1=CC2C(CC1)([C@@]3([C@H](C[C@@H]([C@]34CO4)O2)OC(=O)C)C)C	Active	Non-active	Non-active	Non-active	Non-active	Non-active
517055	OC(=O)C1=CC=CC=C1	Active	Non-active	Non-active	Active	Active	Non-active
478951	C[C@@H]1CC[C@H]2C[C@@H](C(=CC=CC=C[C@H](C[C@H](C(=O)[C@@H]([C@@H](C(=C[C@H](C(=O)C[C@H](OC(=O)[C@@H]3CCCCN3C(=O)C(=O)[C@@]1(O2)O)[C@H](C)C[C@@H]4CC[C@H]([C@@H](C4)OC)O)C)C)O)OC)C)C)C)OC	Active	Non-active	Non-active	Active	Non-active	Non-active
441140	C[C@@H]1CC(=O)C=C([C@]12C(=O)C3=C(O2)C(=C(C=C3OC)OC)Cl)OC	Active	Non-active	Active	Active	Non-active	Active
247705	CC(C)C(C)C=CC(C)C1CCC2C1(CCC3C2=CC=C4C3(CCC(C4)O)C)C	Active	Non-active	Non-active	Active	Non-active	Non-active
122233	CCCCCCCCCCCCCCCC(=O)NC1CC(C(NC(=O)C2C(C(CN2C(=O)C(NC(=O)C(NC(=O)C3CC(CN3C(=O)C(NC1=O)C(C)O)O)C(C(C4=CC=C(C=C4)O)O)O)C(C)O)C)O)O)O	Active	Non-active	Non-active	Active	Non-active	Active
56971651	C[C@H]1/C=C/C=C/C=C/C=C/C=C/C=C/C=C/[C@@H](C[C@H]2[C@@H]([C@H](CC(O2)(C[C@H](C[C@H]([C@@H](CC[C@H](C[C@H](CC(=O)O[C@H]([C@@H]([C@@H]1O)C)C)O)O)O)O)O)O)O)C(=O)O)OC3[C@@H]([C@@H]([C@H]([C@@H](O3)C)O)N)O	Active	Non-active	Active	Active	Non-active	Active
49867925	C[C@@H]1C/C=C/C=C/C=C/C=C/C(C[C@H]2[C@@H]([C@H](C[C@](O2)(C[C@H](CC3C(O3)/C=C/C(=O)O1)O)O)O)C(=O)O)O[C@H]4[C@H]([C@H]([C@@H]([C@H](O4)C)O)N)O	Active	Non-active	Active	Active	Non-active	Active
21775588	C[C@H](/C=C/[C@H](C)C(C)C)C1CCC2[C@@]1(CCC3C2=CC=C4[C@@]3(CC[C@@H](C4)O)C)C	Active	Non-active	Non-active	Active	Non-active	Non-active
16760631	C[C@@H]1CC[C@H]2C[C@@H](/C(=C/C=C/C=C/[C@H](C[C@H](C(=O)[C@@H]([C@@H](/C(=C/[C@H](C(=O)C[C@H](OC(=O)[C@@H]3CCCCN3C(=O)C(=O)[C@@]1(O2)O)C(C)C[C@H]4CC[C@H]([C@@H](C4)OC)O)C)/C)O)OC)C)C)/C)OC	Active	Non-active	Non-active	Active	Non-active	Non-active
16219709	C[C@H]1/C=C/C=C/CC/C=C/C=C/C=C/C=C/[C@@H](C[C@H]2[C@@H]([C@H](C[C@](O2)(C[C@H]([C@@H](CC[C@H](C[C@H](C[C@H](CC(=O)O[C@H]([C@H]([C@@H]1O)C)C)O)O)O)O)O)O)O)C(=O)O)O[C@H]3[C@H]([C@H]([C@@H]([C@H](O3)C)O)N)O	Active	Non-active	Active	Active	Non-active	Active
6713927	C[C@@H]1CC(=O)CC([C@]12C(=O)C3=C(O2)C(=C(C=C3OC)OC)Cl)OC	Active	Non-active	Active	Active	Non-active	Active
6711250	CCCCCC1=C(NC(=C1)/C=C\2/C(=C/C(=C\3/C=CC=N3)/N2)OC)C	Active	Non-active	Non-active	Active	Active	Non-active
6450330	C[C@@H]1[C@H]([C@@H]([C@@H](C(O1)OC\2CC(C(C(CC(=O)CC(CC(CC(CC(CC(=O)CC(CC(=O)OC(C(/C=C/C=C/C=C/C=C/C=C/C=C/C=C2)C)C(C)CCC(CC(=O)C3=CC=C(C=C3)N)O)O)O)O)O)O)O)C(=O)OC)O)O)N)O	Active	Non-active	Non-active	Active	Non-active	Active
6433272	C[C@H]1/C=C/C=C/CC/C=C/C=C/C=C/C=C/C(CC2C(C(C[C@](O2)(CC(C(CCC(CC(CC(CC(=O)O[C@H]([C@@H]([C@@H]1O)C)C)O)O)O)O)O)O)O)C(=O)O)O[C@@H]3[C@H]([C@H]([C@@H]([C@H](O3)C)O)N)O	Active	Non-active	Active	Active	Non-active	Active
6433143	CC(C)C(C)/C=C/C(C)[C@H]1CCC2[C@@]1(CC[C@H]3C2=CC=C4[C@@]3(CC[C@@H](C4)O)C)C	Active	Non-active	Non-active	Active	Non-active	Non-active
6432563	CC(C)C(C)/C=C/C(C)C1CCC2C1(CCC3C2=CC=C4C3(CC[C@@H](C4)O)C)C	Active	Non-active	Non-active	Active	Non-active	Non-active
4283516	CC1CC=CC=CC=CC=CC(CC2C(C(CC(O2)(CC(CC3C(O3)C=CC(=O)O1)O)O)O)C(=O)O)OC4C(C(C(C(O4)C)O)N)O	Active	Non-active	Active	Active	Non-active	Active
5497196	C[C@@H]1CCC2C[C@@H](/C(=C/C=C/C=C/[C@H](C[C@H](C(=O)[C@@H]([C@@H](/C(=C/[C@H](C(=O)C[C@H](OC(=O)[C@@H]3CCCCN3C(=O)C(=O)[C@@]1(O2)O)[C@H](C)C[C@@H]4CC[C@H]([C@@H](C4)OC)O)C)/C)O)OC)C)C)/C)OC	Active	Non-active	Active	Active	Non-active	Non-active
5374464	CC1CCC2CC(/C(=C/C=C/C=C/C(CC(C(=O)C(C(/C(=C/C(C(=O)CC(OC(=O)C3CCCCN3C(=O)C(=O)C1(O2)O)C(C)CC4CCC(C(C4)OC)O)C)/C)O)OC)C)C)/C)OC	Active	Non-active	Non-active	Active	Non-active	Non-active
5351845	C[C@@H](/C=C/C(C)C1CCC2[C@@]1(CCC3C2=CC=C4[C@@]3(CC[C@@H](C4)O)C)C)C(C)C	Active	Non-active	Non-active	Active	Non-active	Non-active
5281902	CC[C@H]\1CC[C@@H]2[C@@H]([C@@H](C[C@@]3(O2)CC[C@H]([C@H](O3)C[C@H](C)O)C)OC(=O)/C=C/[C@H]([C@@H]([C@H](C(=O)[C@H]([C@@H]([C@H](C(=O)[C@@]([C@@H]([C@H](C/C=C/C=C1)C)O)(C)O)C)O)C)C)O)C)C	Active	Non-active	Active	Active	Non-active	Active
5280965	C[C@H]1/C=C/C=C/C=C/C=C/C=C/C=C/C=C/[C@@H](C[C@H]2[C@@H]([C@H](C[C@](O2)(C[C@H](C[C@H]([C@@H](CC[C@H](C[C@H](CC(=O)O[C@H]([C@@H]([C@@H]1O)C)C)O)O)O)O)O)O)O)C(=O)O)O[C@H]3[C@H]([C@H]([C@@H]([C@H](O3)C)O)N)O	Active	Non-active	Active	Active	Non-active	Active
11179	OC(=O)CCCCCCCCC=C	Active	Non-active	Non-active	Non-active	Active	Non-active
6989	CC1=CC(=C(C=C1)C(C)C)O	Active	Non-active	Non-active	Non-active	Active	Non-active
3366	C1=NC(=O)NC(=C1F)N	Active	Non-active	Non-active	Non-active	Active	Non-active
64927	CCN(CC)CCCC(C)NC1=C2C=CC(=CC2=NC=C1)Cl	Active	Non-active	Non-active	Non-active	Active	Non-active
12309519	COC1=CC2=C(C=CN=C2C=C1)[C@H]([C@H]3CC4CCN3CC4C=C)O	Active	Non-active	Non-active	Active	Active	Non-active
456309	C1CCN[C@@H](C1)[C@@H](C2=CC(=NC3=C2C=CC=C3C(F)(F)F)C(F)(F)F)O	Active	Non-active	Non-active	Non-active	Non-active	Non-active
4046	C1CCNC(C1)C(C2=CC(=NC3=C2C=CC=C3C(F)(F)F)C(F)(F)F)O	Active	Non-active	Non-active	Non-active	Non-active	Non-active
25059	C(#N)C(C(=O)N)(Br)Br	Active	Non-active	Non-active	Non-active	Non-active	Non-active
151162	CCCCCCCCCCSCCN	Active	Non-active	Non-active	Non-active	Active	Non-active
7017	C1=CC=C(C=C1)C2=CC=CC=C2O	Active	Non-active	Non-active	Non-active	Active	Non-active
16197471	CC[C@H](C)[C@H]1C(=O)N[C@H]2CSSC[C@H]3C(=O)N[C@H](C(=O)NCC(=O)N[C@H](C(=O)N[C@H](C(=O)N[C@H](C(=O)N[C@H](C(=O)N[C@@H](CSSC[C@@H](C(=O)N[C@H](C(=O)N[C@H](C(=O)N[C@H](C(=O)N[C@H](C(=O)NCC(=O)N1)CCCCN)CC(=O)N)CCCNC(=N)N)C(C)C)NC(=O)[C@H](CO)NC(=O)[C@H](C(C)C)NC(=O)[C@@H]4CCCN4C(=O)[C@H](CC(=O)N)N)C(=O)N[C@@H](CSSC[C@@H](C(=O)N5CCC[C@H]5C(=O)NCC(=O)N[C@H](C(=O)N[C@H](C(=O)N[C@H](C(=O)N[C@H](C(=O)N[C@…	Active	Non-active	Non-active	Active	Non-active	Non-active
16132195	CC(C)[C@@H](C(=O)NCC(=O)N[C@@H](CCC(=O)O)C(=O)N[C@@H](CS)C(=O)N[C@@H](C(C)C)C(=O)N[C@@H](CCCNC(=N)N)C(=O)NCC(=O)N[C@@H](CCCNC(=N)N)C(=O)N[C@@H](CS)C(=O)N1CCC[C@H]1C(=O)N[C@@H](CO)C(=O)NCC(=O)N[C@@H](CCSC)C(=O)N[C@@H](CS)C(=O)N[C@@H](CS)C(=O)N[C@@H](CO)C(=O)N[C@@H](CCC(=O)N)C(=O)N[C@@H](CC2=CC=CC=C2)C(=O)NCC(=O)N[C@@H](CC3=CC=C(C=C3)O)C(=O)N[C@@H](CS)C(=O)NCC(=O)N[C@@H](CCCCN)C(=O)NCC(=O)N4CCC[C@H…	Active	Non-active	Non-active	Active	Non-active	Non-active
16131103	CC(C)C[C@@H](C(=O)N[C@H]1CSSC[C@H](NC(=O)[C@@H](NC(=O)[C@@H]2CSSC[C@@H](C(=O)N[C@H](C(=O)NCC(=O)N[C@H](C(=O)N[C@H](C(=O)N2)CC3=CC=CC=C3)CCCNC(=N)N)CCCNC(=N)N)NC(=O)[C@@H](NC1=O)CC4=CC=C(C=C4)O)C(C)C)C(=O)N[C@@H](C(C)C)C(=O)NCC(=O)N[C@@H](CCCNC(=N)N)C(=O)N)NC(=O)CNC(=O)CNC(=O)[C@H](CCCNC(=N)N)N	Active	Non-active	Non-active	Active	Non-active	Active
548230	CCCCCCCCOC1C(C(C(C(O1)CO)O)O)O	Active	Non-active	Non-active	Active	Non-active	Non-active
470999	C1C[C@H]([C@H](O[C@@H]1CN)O[C@@H]2[C@H](C[C@H]([C@@H]([C@H]2O)O[C@@H]3[C@@H]([C@H]([C@@H]([C@H](O3)CO)O)N)O)N)N)N	Active	Non-active	Non-active	Active	Non-active	Active
451488	C[C@H](CCC(=O)NCCS(=O)(=O)O)[C@H]1CC[C@@H]2[C@@]1(CCC3[C@H]2CC[C@H]4[C@@]3(CC[C@H](C4)O)C)C	Active	Non-active	Non-active	Active	Non-active	Non-active
439763	C[C@H](CCC(=O)NCCS(=O)(=O)O)[C@H]1CC[C@@H]2[C@@]1(CC[C@H]3[C@H]2CC[C@H]4[C@@]3(CC[C@H](C4)O)C)C	Active	Non-active	Non-active	Active	Non-active	Non-active
387316	C[C@H](CCC(=O)NCCS(=O)(=O)O)[C@H]1CC[C@@H]2[C@@]1(CC[C@H]3[C@H]2[C@@H](C[C@H]4[C@@]3(CC[C@H](C4)O)C)O)C	Active	Non-active	Non-active	Active	Non-active	Non-active
171092	CCCCCCCCCC1=CC=CC=C1OCCO	Active	Non-active	Non-active	Non-active	Active	Non-active
164853	C[C@H](CCC(=O)O)[C@H]1CC[C@@H]2[C@@]1(CC[C@H]3[C@H]2CC[C@H]4[C@@]3(CC[C@@H](C4)O)C)C	Active	Non-active	Non-active	Active	Active	Non-active
114880	CCCCCCCCCCCCO[C@H]1[C@@H]([C@H]([C@@H]([C@H](O1)CO)O[C@@H]2[C@@H]([C@H]([C@@H]([C@H](O2)CO)O)O)O)O)O	Active	Non-active	Non-active	Active	Non-active	Non-active
71388	CC(C)(C)CC(C)(C)C1=CC=C(O)C=C1	Active	Non-active	Non-active	Non-active	Active	Non-active
54676344	C[C@@H]1[C@H]2[C@@H]([C@H]3[C@@H](C(=O)C(=C(C3(C(=O)C2=C(C4=C1C=CC=C4O)O)O)O)C(=O)N)N(C)C)O	Active	Non-active	Non-active	Active	Non-active	Active
53477716	C[C@H](CCC(=O)NCCS(=O)(=O)O)C1CCC2[C@@]1(CCC3C2CCC4[C@@]3(CC[C@H](C4)O)C)C	Active	Non-active	Non-active	Active	Non-active	Non-active
25244885	CCCCCCCCO[C@H]1C([C@H](C([C@H](O1)CO)O)O)O	Active	Non-active	Non-active	Active	Non-active	Non-active
22833540	C[C@H](CCC(=O)NCC(=O)O)[C@H]1CCC2[C@@]1(CCC3C2[C@@H](C[C@H]4[C@@]3(CC[C@H](C4)O)C)O)C	Active	Non-active	Non-active	Active	Non-active	Non-active
23691688	CCCCCCCCCCCCN(C)CC(O)=O	Active	Non-active	Non-active	Non-active	Active	Non-active
23670522	C[C@H](CCC(=O)NCC(=O)[O-])[C@H]1CC[C@@H]2[C@@]1([C@H](C[C@H]3[C@H]2[C@@H](C[C@H]4[C@@]3(CC[C@H](C4)O)C)O)O)C	Active	Non-active	Non-active	Active	Non-active	Non-active
23666345	C[C@H](CCC(=O)NCCS(=O)(=O)[O-])[C@H]1CC[C@@H]2[C@@]1([C@H](C[C@H]3[C@H]2[C@@H](C[C@H]4[C@@]3(CC[C@H](C4)O)C)O)O)C	Active	Non-active	Non-active	Active	Non-active	Non-active
23617285	C[C@H](CCC(=O)NCC(=O)O)[C@H]1CC[C@@H]2[C@@]1([C@H](C[C@H]3[C@H]2[C@@H](CC4[C@@]3(CC[C@H](C4)O)C)O)O)C	Active	Non-active	Non-active	Active	Non-active	Non-active
16219399	C[C@H](CCC(=O)NCC(=O)O)[C@H]1CC[C@@H]2[C@@]1([C@H](C[C@H]3C2[C@@H](C[C@H]4[C@@]3(CC[C@H](C4)O)C)O)O)C	Active	Non-active	Non-active	Active	Non-active	Non-active
16129635	CC(C)C[C@H]1C(=O)N[C@@H](C(=O)N2CCC[C@H]2C(=O)N[C@H](C(=O)N[C@@H](C(=O)N[C@H](C(=O)N[C@H](C(=O)N[C@H](C(=O)N[C@H](C(=O)N[C@H](C(=O)N1)CCCN)C(C)C)CC3=CC=C(C=C3)O)CCC(=O)N)CC(=O)N)CC4=CC=CC=C4)CC5=CC=CC=C5)CC6=CC=CC=C6	Active	Non-active	Non-active	Active	Non-active	Active
9548796	C[C@H](CCC(=O)NCC(=O)[O-])[C@H]1CC[C@@H]2[C@@]1(CC[C@H]3[C@H]2[C@@H](C[C@H]4[C@@]3(CC[C@H](C4)O)C)O)C	Active	Non-active	Non-active	Active	Non-active	Non-active
9548567	C[C@H](CCC(=O)NCCS(=O)(=O)[O-])[C@H]1CC[C@@H]2[C@@]1(CC[C@H]3[C@H]2CC[C@H]4[C@@]3(CC[C@H](C4)O)C)C	Active	Non-active	Non-active	Active	Non-active	Non-active
6419972	C[C@@H]1C/C=C/C=C/[C@@H]([C@@H](C[C@@H]([C@@H]([C@H]([C@@H](CC(=O)O1)OC(=O)C)OC)OC2C(C(C(C(O2)C)OC3CC(C(C(O3)C)OC(=O)CC(C)C)(C)O)N(C)C)O)CC=O)C)O	Active	Non-active	Active	Active	Non-active	Active
4516974	CC(CCC(=O)NCCS(=O)(=O)O)C1CCC2C1(CCC3C2CCC4C3(CCC(C4)O)C)C	Active	Non-active	Non-active	Active	Non-active	Non-active
5460318	C[C@H](CCC(=O)[O-])[C@H]1CC[C@@H]2[C@@]1(CC[C@H]3[C@H]2CC[C@H]4[C@@]3(CC[C@H](C4)O)C)C	Active	Non-active	Non-active	Active	Non-active	Non-active
5284579	C[C@@H]1C/C=C/C=C/[C@@H]([C@@H](C[C@@H]([C@@H](C([C@@H](CC(=O)O1)OC(=O)C)OC)O[C@H]2[C@@H]([C@H]([C@@H]([C@H](O2)C)O[C@H]3C[C@@]([C@@H]([C@@H](O3)C)OC(=O)CC(C)C)(C)O)N(C)C)O)CC=O)C)O	Active	Non-active	Active	Active	Non-active	Active
5282188	CCC(=O)O[C@@H]1CC(=O)O[C@@H](C/C=C/C=C/[C@@H]([C@@H](C[C@@H]([C@@H]([C@H]1OC)O[C@H]2[C@@H]([C@H]([C@@H]([C@H](O2)C)O[C@H]3C[C@@]([C@H]([C@@H](O3)C)OC(=O)CC)(C)OC(=O)C)N(C)C)O)CC=O)C)OC(=O)C)C	Active	Non-active	Active	Active	Non-active	Active
5282165	C[C@@H]1C/C=C/C=C/[C@@H]([C@@H](C[C@@H]([C@@H]([C@H]([C@@H](CC(=O)O1)OC(=O)C)OC)O[C@H]2[C@@H]([C@H]([C@@H]([C@H](O2)C)O[C@H]3C[C@@]([C@H]([C@@H](O3)C)OC(=O)CC(C)C)(C)O)N(C)C)O)CC=O)C)O	Active	Non-active	Active	Active	Non-active	Active
3035440	CCCCCCCCS[C@H]1[C@@H](C([C@@H]([C@H](O1)CO)O)O)O	Active	Non-active	Non-active	Active	Non-active	Non-active
3035026	C[C@H](CCC(=O)NCC(=O)O)[C@H]1CC[C@@H]2[C@@]1([C@H](C[C@H]3[C@H]2CC[C@H]4[C@@]3(CC[C@H](C4)O)C)O)C	Active	Non-active	Non-active	Active	Non-active	Non-active
3481630	CCCCCCCCCCCCOC1C(C(C(C(O1)CO)OC2C(C(C(C(O2)CO)O)O)O)O)O	Active	Non-active	Non-active	Active	Non-active	Non-active
62852	CCCCCCCCO[C@H]1[C@@H]([C@H]([C@@H]([C@H](O1)CO)O)O)O	Active	Non-active	Non-active	Active	Non-active	Non-active
62080	CCCCCCCCOC1[C@@H]([C@H]([C@@H]([C@H](O1)CO)O)O)O	Active	Non-active	Non-active	Active	Non-active	Non-active
24775	CC(C)(C)CC(C)(C)C1=CC=C(C=C1)OCCOCCO	Active	Non-active	Non-active	Non-active	Active	Non-active
16547	CC(=O)C1=C(C(=C(C=C1O)O)C(=O)C)O	Active	Non-active	Non-active	Active	Active	Non-active
12544	C[C@H](CCC(=O)NCC(=O)O)[C@H]1CC[C@@H]2[C@@]1(CC[C@H]3[C@H]2[C@@H](C[C@H]4[C@@]3(CC[C@H](C4)O)C)O)C	Active	Non-active	Non-active	Active	Non-active	Non-active
10591	CC(CCC(=O)NCCS(=O)(=O)O)[C@H]1CC[C@@H]2[C@@]1(CC[C@H]3[C@H]2[C@@H](C[C@H]4[C@@]3(CC[C@H](C4)O)C)O)C	Active	Non-active	Non-active	Active	Non-active	Non-active
10140	C[C@H](CCC(=O)NCC(=O)O)[C@H]1CC[C@@H]2[C@@]1([C@H](C[C@H]3[C@H]2[C@@H](C[C@H]4[C@@]3(CC[C@H](C4)O)C)O)O)C	Active	Non-active	Non-active	Active	Non-active	Non-active
6634	C1=CC(=CC=C1N)S(=O)(=O)NC2=NN=C(C=C2)Cl	Active	Non-active	Non-active	Non-active	Active	Non-active
6054	C1=CC=C(C=C1)CCO	Active	Non-active	Non-active	Non-active	Active	Non-active
5327	CC1=CC(=NC(=N1)NS(=O)(=O)C2=CC=C(C=C2)N)C	Active	Non-active	Non-active	Non-active	Active	Non-active
5324	C1=CC(=CC=C1N)S(=O)(=O)N=C(N)N	Active	Non-active	Non-active	Non-active	Active	Non-active
4831	CCN1C=C(C(=O)C2=CN=C(N=C21)N3CCNCC3)C(=O)O	Active	Non-active	Non-active	Active	Active	Non-active
3021	C1CC(C(OC1CN)OC2C(CC(C(C2O)OC3C(C(C(C(O3)CO)O)N)O)N)N)N	Active	Non-active	Non-active	Active	Non-active	Active
56	CC1(COC(C(C1NC)O)OC2C(CC(C(C2O)OC3C(CCC(O3)CN)N)N)O)O	Active	Non-active	Active	Active	Non-active	Active
198409	CCC(=O)NC1C(OC(C(C1O)O)OC(C(CN)O)C(C(CO)O)N)CO	Active	Non-active	Active	Active	Non-active	Active
123865	C[C@H]([C@@H]1[C@H]([C@@H]([C@H]([C@H](O1)O[C@@H]2[C@H](C[C@H]([C@@H]([C@H]2O)O[C@@H]3[C@@H]([C@H]([C@@](CO3)(C)O)NC)O)N)N)N)O)O)O	Active	Non-active	Active	Active	Non-active	Active
197178	CNCC(=O)N(C)C1C(C(C(OC1NC2=NC3C(N2)C(CNC3=O)O)CO)OC(=O)N)O	Active	Non-active	Active	Active	Non-active	Active
5380372	C(=C\C(=O)O)\C(=N)N	Active	Non-active	Active	Non-active	Active	Non-active
172407	CC1CC(C(OC1C2CCC(O2)C3CC(C(O3)C4(CC(C5(O4)C(C(CC(O5)CC6C(C(C(C(O6)(C(C(=O)O)O)O)C)OC)C)OC)C)C)C)OC7CCC(C(O7)C)OC)(C)O)C	Active	Non-active	Active	Active	Non-active	Active
98033	CC1C(C(CC(O1)C2=CC(=C(C3=C2C(=O)C4=CC(=C5C(=O)C=C(OC5=C4C3=O)C6(C(O6)C7C(O7)C)C)C)O)C8CC(C(C(O8)C)O)(C)N(C)C)N(C)C)O	Active	Non-active	Active	Active	Non-active	Active
24847675	CCC1C(=O)N2CCCC2C(=O)N(C(C(=O)N3CCC(=O)CC3C(=O)NC(C(=O)OC(C(C(=O)N1)NC(=O)C4=C(C=CC=N4)O)C)C5=CC=CC=C5)CC6=CC=CC=C6)C.C[C@@H]1/C=C/C(=O)NC/C=C/C(=C/[C@H](CC(=O)CC2=NC(=CO2)C(=O)N3CCC=C3C(=O)O[C@@H]1C(C)C)O)/C	Active	Non-active	Active	Active	Non-active	Active
6436199	CCCCC/C=C\C/C=C\CCCCCCCC(=O)N[C@H]1C[C@H]([C@H](NC(=O)[C@@H]2[C@H]([C@H](CN2C(=O)[C@@H](NC(=O)[C@@H](NC(=O)[C@@H]3C[C@H](CN3C(=O)[C@@H](NC1=O)[C@H](C)O)O)[C@@H]([C@H](C4=CC=C(C=C4)O)O)O)[C@H](C)O)C)O)O)O	Active	Non-active	Active	Active	Non-active	Active
5361010	CC1=CC2=CC3=C(C4=C(C5=C(C6=C4C(C3)OCO6)C(=O)C7=C(O5)C(CCC7O)OC)O)C(=C2C(=O)N1N)O	Active	Non-active	Active	Active	Non-active	Active
11824	C1=C(C2=C(N1[C@H]3[C@@H]([C@@H]([C@H](O3)CO)O)O)N=CN=C2N)C#N	Active	Non-active	Active	Active	Non-active	Active
6436146	C[C@@H]1[C@H]([C@@H]([C@H]([C@H](O1)OC2=CC=C(C=C2)/C=C/C(=O)NCCCNCCCCN)N=C(N)N)O)NC(=O)N[C@@H]3[C@@H]([C@H]([C@@H](CO3)O[C@H]4[C@@H]([C@@H]5[C@@H](CO4)OC(=O)N5)NC(=O)N)O)NC(=O)N	Active	Non-active	Active	Active	Non-active	Active
16129666	CCC(C)C1C(=O)NC(C(=O)NC(=C)C(=O)NC(C(=O)NC23CCC(=NC2C4=CSC(=N4)C(C(OC(=O)C5=NC6=C(C=CC(C6O)N1)C(=C5)C(C)O)C)NC(=O)C7=CSC(=N7)C(NC(=O)C8CSC(=N8)/C(=C\C)/NC(=O)C(NC(=O)C9=CSC3=N9)C(C)O)C(C)(C(C)O)O)C1=NC(=CS1)C(=O)NC(=C)C(=O)NC(=C)C(=O)N)C)C	Active	Non-active	Active	Active	Non-active	Active
173742	CC(=O)N[C@@H]1[C@H](O[C@@H]([C@@H]([C@H]1O)O)O[C@H]([C@H](CN)O)[C@@H]([C@@H](CO)O)N)CO	Active	Non-active	Active	Active	Non-active	Active
656673	C[C@@H]1[C@H]([C@@H](C[C@@H](O1)O[C@H]2[C@@H](CC3=C(C2=O)C(=C4C(=C3)C=C(C(=C4O)C)O[C@H]5C[C@H]([C@H]([C@H](O5)C)OC(=O)C)O[C@@H]6C[C@H]([C@H]([C@H](O6)C)OC)O)O)[C@@H](C(=O)[C@H]([C@@H](C)O)O)OC)O[C@H]7C[C@H]([C@@H]([C@H](O7)C)O)O[C@H]8C[C@]([C@H]([C@@H](O8)C)OC(=O)C)(C)O)O	Active	Non-active	Active	Active	Non-active	Active
160294	CC1=C(C(=C2[C@H]3[C@@H]4CC5=C([C@@H](N4[C@H]([C@H](N3C)CC2=C1)O)CNC(=O)[C@H](C)N)C(=O)C(=C(C5=O)C)OC)O)OC	Active	Non-active	Active	Active	Non-active	Active
65452	CC[C@H]([C@H]1[C@H](C[C@@H]([C@@H](O1)[C@@H](C)[C@@H]([C@H](C)C(=O)[C@H](CC)[C@@H]2[C@H](C[C@H]([C@]3(O2)C=C[C@H]([C@@]4(O3)CC[C@@](O4)(C)[C@H]5CC[C@@]([C@@H](O5)C)(CC)O)O)C)C)O)C)C)C(=O)O	Active	Non-active	Active	Active	Non-active	Active
6441696	C/C=C/1\C(=O)OC(C(C(=O)NC(C(=O)NC(C(=O)N1)C)C(C)C)NC(=O)C(CC2=CC=CC=C2)NC(=O)C(CC(C)C)NC(=O)C(CC3=CC=CC=C3)NC(=O)C)C	Active	Non-active	Active	Active	Non-active	Active
149070	CCC(C)SC1C2C(=O)N(C3(CC3C)C(=O)OCC(C(=O)NC(C(=O)N(C(CS1)C(=O)N(C4(CC4C)C(=O)OCC(C(=O)NC(C(=O)N2C)C)NC(=O)C5=NC6=CC=CC=C6C=C5O)C)C)C)NC(=O)C7=NC8=CC=CC=C8C=C7O)C	Active	Non-active	Active	Active	Non-active	Active
5282200	CCCCC[C@H]([C@@H]1[C@H](C[C@H](C[C@H](C[C@H](C[C@H](C[C@H]([C@H]([C@@H](/C(=C/C=C/C=C/C=C/C=C/[C@@H]([C@H](OC1=O)C)O)/C)O)O)O)O)O)O)O)O)O	Active	Non-active	Active	Active	Non-active	Active
46874763	C[C@H](C(=O)N[C@@H](C)P(=O)(CC(CCC(=O)O)C(=O)O)O)OC1C(C(OC(C1O)CO)OP(=O)(O)OP(=O)(O)OC[C@@H]2[C@H]([C@H](C(O2)N3C=C(C(=O)NC3=O)I)O)O)NC(=O)C	Active	Non-active	Active	Active	Non-active	Non-active
6140	C1=CC=C(C=C1)C[C@@H](C(=O)O)N	Active	Non-active	Active	Non-active	Active	Non-active
175135	CC1=C(C=CC(=O)N1O)OC	Active	Non-active	Active	Non-active	Active	Non-active
5382567	CC1C2CC(/C=C/C(=C/CC(/C=C/C(=C/C(C(C1=O)(C(=O)O2)C)NC(=O)C(=O)C)/C)O)/C)OC(=O)C	Active	Non-active	Active	Active	Non-active	Active
5383587	CCC1C(C2C(O2)(/C=C/C(=O)C(CC(C(C(C(CC(=O)O1)O)C)OC3C(C(CC(O3)C)N(C)C)O)CC=O)C)C)C	Active	Non-active	Active	Active	Non-active	Active
171077	CC(C1C(C(C(C(O1)OC2C(CC(C(C2O)OC3C(C(C(CO3)(C)O)NC)O)N)N)N)O)O)N	Active	Non-active	Active	Active	Non-active	Active
6450471	CC([C@H]1[C@H]2CC(=C(N2C1=O)C(=O)O)S/C=C/NC(=O)C)OS(=O)(=O)O	Active	Non-active	Active	Active	Non-active	Active
34230	C[C@H]1CC[C@@H](O[C@H]1[C@@H](C)C(=O)O)C[C@@H]2C[C@H]([C@H]([C@@]3(O2)[C@@H](C[C@@](O3)(C)[C@H]4CC[C@@](O4)(C)[C@H]5[C@H](C[C@@H](O5)[C@@H]6[C@H](C[C@H]([C@@](O6)(CO)O)C)C)C)C)C)OC	Active	Non-active	Active	Active	Non-active	Active
172924	C([C@H]([C@H]([C@@H]([C@H](C=O)NC(=O)N)O)O)O)O	Active	Non-active	Active	Non-active	Non-active	Non-active
6436292	CC/C(=C/C(C)C/C=C/C(=C/C(CO)C(=O)C(C)C(C(C)C/C(=C/C(=O)O)/C)O)/C)/C=C/C1C(C=CC(=O)O1)C	Active	Non-active	Active	Active	Non-active	Active
37768	C1[C@@H]([C@H]([C@@H]([C@H]([C@@H]1NC(=O)[C@H](CCN)O)O[C@@H]2[C@@H]([C@H]([C@@H]([C@H](O2)CO)O)N)O)O)O[C@@H]3[C@@H]([C@H]([C@@H]([C@H](O3)CN)O)O)O)N	Active	Non-active	Active	Active	Non-active	Active
6439108	CC1C(O1)/C(=C\C(C)C(=O)CC(CC2CC(=O)NC(=O)C2)O)/C	Active	Non-active	Active	Active	Non-active	Active
215651	C1C(C(C(C(C1N)OC2C(C(C(C(O2)CO)O)O)N)OC3C(C(C(O3)CO)OC4C(C(C(C(O4)CN)OC5C(C(C(C(O5)CO)O)O)O)O)N)O)O)N	Active	Non-active	Active	Active	Non-active	Active
3087182	CC12CC3=C(C(=C4C(=C3)C=CC5=C4C(=O)C6=C(C5=O)OC7=CC(=C(C=C7C6=O)O)OC)O)C(=O)N1CCO2	Active	Non-active	Active	Active	Non-active	Active
3058287	C[C@H]([C@@H](C(=O)N[C@H](CCCN)C(=O)N[C@@H](CCCCN)C(=O)N[C@H](CC1=CC=C(C=C1)O)C(=O)O)NC(=O)[C@@H](CCCN)NC(=O)[C@H](C[C@@H](CN=C(N)N)O)NC(=O)[C@H](CCCN=C(N)N)N)O	Active	Non-active	Active	Active	Non-active	Active
34747	CC(C(C(C(C(C=O)O)O)O)O)O	Active	Non-active	Active	Active	Active	Non-active
9577442	CCC1C(C2C(O2)(/C=C/C(=O)C(CC(C(C(C(CC(=O)O1)O)C)OC3C(C(CC(O3)C)N(C)C)O)C/C=N/NC(=O)C)C)C)C	Active	Non-active	Active	Active	Non-active	Active
19489	C1C[C@H](CC=C1)C(=O)C(=O)O	Active	Non-active	Active	Non-active	Active	Non-active
6441669	C[C@@H]1CC[C@@H](O[C@@]12[C@H](C[C@@H](O2)[C@@H]3[C@H](C[C@H]([C@@](O3)(CO)O)C)C)C)[C@@]4(CC[C@@]5(O4)[C@@H]([C@@H](C[C@H](O5)[C@@H](C)/C=C(\C)/C(=O)[C@H](C)C[C@H](C)C(=O)O)O[C@H]6CC[C@@H]([C@H](O6)C)OC)C)C	Active	Non-active	Active	Active	Non-active	Active
6447308	CC[C@@H]1[C@H](C2C(O2)/C=C/C(=O)[C@@H](C[C@@H]([C@@H]([C@H](/C=C/C(=O)O1)C)O[C@H]3[C@@H]([C@H](C[C@H](O3)C)N(C)C)O)C)C)CO[C@H]4[C@@H]([C@@H]([C@@H]([C@H](O4)C)O)OC)OC	Active	Non-active	Active	Active	Non-active	Active
6441568	CCC(=O)O[C@@H]1CC(=O)O[C@@H](C/C=C/C=C/[C@@H]([C@@H](C[C@@H]([C@@H]([C@H]1OC)O[C@H]2[C@@H]([C@H]([C@@H]([C@H](O2)C)O[C@H]3C[C@@]([C@H]([C@@H](O3)C)OC(=O)C)(C)O)N(C)C)O)CC=O)C)O)C	Active	Non-active	Active	Active	Non-active	Active
6441018	CC[C@H]1CC[C@@H]2[C@@H]1C=C[C@@H]([C@H]2C(=O)C3=CC=CN3)/C=C/C=C(\CC)/[C@H]4[C@H](CCC(O4)[C@@H](C)C(=O)O)C	Active	Non-active	Active	Active	Non-active	Active
3044301	CC(=O)OC[C@@]1([C@H](C=CC1=O)O)O	Active	Non-active	Active	Non-active	Non-active	Active
6917907	CC/C(=C/[C@H](C)C/C=C/C(=C/[C@@H](C)C(=O)[C@@H](C)[C@@H]([C@@H](C)C/C(=C/C(=O)O)/C)O)/C)/C=C/[C@H]1[C@H](C=CC(=O)O1)C	Active	Non-active	Active	Active	Non-active	Active
6440819	C[C@H]1/C=C/C=C/C=C/C=C/C=C/C=C/C=C/[C@@H](C[C@H]2[C@@H]([C@H](C[C@](O2)(C[C@H]([C@@H](CC[C@H](CC(=O)C[C@H](CC(=O)O[C@H]([C@@H]([C@@H]1O)C)C)O)O)O)O)O)O)C(=O)O)O[C@H]3[C@H]([C@H]([C@@H]([C@H](O3)C)O)N)O	Active	Non-active	Active	Active	Non-active	Active
196972	C[C@@H]1[C@@H](C(=O)N[C@@H](C(=O)N2C[C@@H](C[C@@H]2C(=O)N(CC(=O)N(C(C(=O)N[C@H](C(=O)N([C@H](C(=O)O1)C3=CC=CC=C3)C)C)[C@@H](C)C(C)C)C)C)O)CC(C)C)NC(=O)C4=C(C=CC=N4)O	Active	Non-active	Active	Active	Non-active	Active
73657	CC[C@@H]1[C@@]([C@@H]([C@H](C(=O)[C@@H](C[C@@]([C@@H]([C@H]([C@@H]([C@H](C(=O)O1)C)O[C@H]2C[C@@]([C@H]([C@@H](O2)C)O)(C)O)C)O[C@H]3[C@@H]([C@H](C[C@H](O3)C)N(C)C)O)(C)O[C@H]4C[C@H](C([C@@H](O4)C)O)N(C)C)C)C)O)(C)O	Active	Non-active	Active	Active	Non-active	Active
206186	CC1C(OC(C(C1OC)C)(C)O)C2CCC(O2)C3CCC(O3)C4(C(C(C5(O4)C(C(CC(O5)CC6C(C(C(C(O6)(C(C)C(=O)O)O)C)OC7CCC(C(O7)C)OC)(C)OC)OC)C)C)OC)C	Active	Non-active	Active	Active	Non-active	Active
163341	C[C@@H](C(=O)OC(=O)[C@H](C1CC(N(C1=O)O)O)N)N	Active	Non-active	Active	Active	Non-active	Non-active
72394	C1[C@H]([C@@H]([C@H]([C@@H]([C@H]1N)O[C@@H]2[C@@H](C[C@@H]([C@H](O2)CO)O)N)O[C@H]3[C@@H]([C@@H]([C@H](O3)CO)O[C@@H]4[C@@H]([C@H]([C@@H]([C@@H](O4)CN)O[C@@H]5[C@H]([C@H]([C@@H]([C@H](O5)CO)O)O)O)O)N)O)O)N	Active	Non-active	Active	Active	Non-active	Active
3060240	C[C@H](C(=O)NC(=O)CC[C@@H](C(=O)O)N)N[C@]1(CN(C1=O)S(=O)(=O)O)OC	Active	Non-active	Active	Active	Non-active	Active
3058288	C[C@H]([C@@H](C(=O)N[C@H](CCCN)C(=O)N[C@@H](CC(CN=C(N)N)O)C(=O)N[C@H](CC1=CC=C(C=C1)O)C(=O)O)NC(=O)[C@@H](CCCN)NC(=O)[C@H](C[C@@H](CN=C(N)N)O)NC(=O)[C@H](CCCN=C(N)N)N)O	Active	Non-active	Active	Active	Non-active	Active
73612	C[C@@H]1[C@H]([C@@H](C[C@@H](O1)O[C@@H]2C[C@@H](O[C@@H](C2O)C)O[C@H]3[C@@H](CC4=C(C3=O)C(=C5C(=C4)C=C(C=C5O)O[C@H]6C[C@H]([C@H]([C@H](O6)C)O[C@@H]7C[C@H]([C@H]([C@H](O7)C)OC)O)OC(=O)C)O)[C@@H](C(=O)[C@H]([C@@H](C)O)O)OC)O[C@H]8CC([C@H]([C@@H](O8)C)OC(=O)C(C)C)(C)O)O	Active	Non-active	Active	Active	Non-active	Active
6439115	CC(=O)OC1CC(=CO1)/C=C/C(=O)NC2=C(CCC2=O)O	Active	Non-active	Active	Active	Non-active	Active
6445459	CCC(=O)OC1CC(=O)OC(CC2C(O2)/C=C/C(C(CC(C(C1OC)OC3C(C(C(C(O3)C)OC4CC(C(C(O4)C)OC(=O)CC(C)C)(C)O)N(C)C)O)CC=O)C)O)C	Active	Non-active	Active	Active	Non-active	Active
6419429	C1[C@@H](C(=O)N1[C@H](C2=CC=C(C=C2)O)C(=O)O)NC(=O)/C(=N/O)/C3=CC=C(C=C3)OCC[C@H](C(=O)O)N	Active	Non-active	Active	Active	Non-active	Active
65482	C1=NC2=C(C(=N1)N)N=CN2[C@H]3[C@@H]([C@@H]([C@H](O3)C[C@H](CC[C@@H](C(=O)O)N)N)O)O	Active	Non-active	Active	Active	Non-active	Active
3888	CCC(C1C(CC(O1)(CC)C2CCC(C(O2)C)(CC)O)C)C(=O)C(C)C(C(C)CCC3=C(C(=C(C=C3)C)O)C(=O)O)O	Active	Non-active	Active	Active	Non-active	Active
16131294	C1[C@@H]2C(=O)N[C@@H](C3=CC(=CC(=C3)O)OC4=C(C=CC(=C4)[C@H](C(=O)N2)N)O)C(=O)N[C@@H]5C6=CC(=C(C(=C6)OC7=C(C=C(C=C7)[C@H]([C@H]8C(=O)N[C@@H](C9=CC(=CC(=C9C2=C(C=CC(=C2)C(C(=O)N8)NC5=O)O)O)O)C(=O)O)O)Cl)O)OC2=C(C=C1C=C2)Cl	Active	Non-active	Active	Active	Non-active	Active
6450280	CC[C@H](C)/C=C/C(=O)N1CC(C[C@H]1C(=O)N[C@@H](CC(C)CC(CC(=O)CC)O)C(=O)N[C@@H](C(C(C)C)O)C(=O)NC(C)(C)C(=O)N[C@@H](CC(C)C)C(=O)N[C@@H](CC(C)C)C(=O)NC(C)(C)C(=O)NC(C)(C)C(=O)NCCCC(=O)N)C	Active	Non-active	Active	Active	Non-active	Active
175076	CNCC1CCC(C(O1)OC2C(CC(C(C2O)NC)OC)N)N	Active	Non-active	Active	Active	Non-active	Active
171794	C(/C=C/P(=O)(O)O)N(C=O)O	Active	Non-active	Active	Non-active	Non-active	Non-active
16130667	CC(=O)O[C@H]1CC=NN2[C@@H]1C(=O)NCC(=O)N(CC(=O)N([C@H](C(=O)OC[C@H](C(=O)N3[C@@H]([C@H](CC=N3)O)C(=O)NCC(=O)N(CC(=O)N([C@H](C(=O)OC[C@H](C2=O)NC(=O)C4=C(C=C5C=C(C=CC5=N4)OC)O)C(C)(C)O)C)C)NC(=O)C6=C(C=C7C=C(C=CC7=N6)OC)O)C(C)(C)O)C)C	Active	Non-active	Active	Active	Non-active	Active
40486	C[C@H]1CCC2([C@@H](C[C@H]([C@H](O2)C(C)C(=O)C3=CC=CN3)C)C)O[C@H]1CC4=NC5=C(O4)C=CC(=C5C(=O)O)NC	Active	Non-active	Active	Active	Non-active	Active
6447533	C[C@@H]1[C@@H]2C[C@]([C@@H](/C=C/C=C(/CC3=CC(=C(C(=C3)OC)Cl)NC(=O)C[C@@H]([C@]4([C@H]1O4)C)OC(=O)C(C)C)\C)OC)(NC(=O)O2)O	Active	Non-active	Active	Active	Non-active	Active
6245	C1=CN(C2=C1C(=NC=N2)N)[C@H]3[C@@H]([C@@H]([C@H](O3)CO)O)O	Active	Non-active	Active	Active	Non-active	Active
14978	C1=C(C2=C(N1[C@H]3[C@@H]([C@@H]([C@H](O3)CO)O)O)N=CN=C2N)C(=O)N	Active	Non-active	Active	Active	Non-active	Active
5153	C1=C(C2=C(N1C3C(C(C(O3)CO)O)O)N=CN=C2N)C(=O)N	Active	Non-active	Active	Active	Non-active	Active
163394	CCC(C1C(CC(O1)(C)C2(C(CC(O2)(CC)C(C)O)C)O)C)C(=O)C(C)C(C(C)C3C(CC(C(O3)(C(C)C(=O)O)O)C)C)O	Active	Non-active	Active	Active	Non-active	Active
163099	C[C@H]1C[C@H]([C@@](OC1[C@H]2CC[C@@H](O2)[C@@H]3CCC(O3)[C@@]4([C@@H]([C@H](C5(O4)[C@@H]([C@@H](C[C@H](O5)C[C@H]6[C@H]([C@H]([C@H]([C@H](O6)[C@@H](C)C(=O)OO)C)O[C@@H]7CC[C@@H]([C@H](O7)C)OC)C)OC)C)C)OC)C)(C)O)C	Active	Non-active	Active	Active	Non-active	Active
301929	C[C@]12CCC[C@]3([C@@H]1[C@@H](C=C4C2=CC(=O)O[C@@H]4OC)OC3=O)C	Active	Non-active	Active	Non-active	Non-active	Non-active
5358378	CCC1C(C2C(O2)(/C=C/C(=O)C(CC(C(C(C(CC(=O)O1)O)C)OC3C(C(C(C(O3)C)O)N(C)C)O)CC=O)C)C)C	Active	Non-active	Active	Active	Non-active	Active
66363	CC1C(C(C(C(O1)OC2C(C(C(=O)C3=C2C(=C4C(=C3)C(=O)C5=CC(=CC(=C5C4=O)O)OC)O)(C)O)OC)OC)O)O	Active	Active	Active	Active	Non-active	Active
194965	C[C@H]([C@H]1[C@H]2CC(=C(N2C1=O)C(=O)O)SCC(=NC)N(C)C)F	Active	Non-active	Active	Active	Non-active	Active
190995	C(C1C(C2C(C(O1)OC3C(C(C(C(C3O)N)O)N)O)OC4(O2)C(C(C(C(O4)C(CO)N)O)O)O)O)O	Active	Non-active	Active	Active	Non-active	Active
6450320	C/C=C(/C(=O)O[C@@H]1[C@H](OC([C@@H]([C@@H]1O[C@@H]2C[C@H]([C@H]([C@H](O2)C)O)OC)O)C3(CC(=O)C(=C(C3=O)C(=O)O)N)O)COC(=O)C)\N=C=S	Active	Non-active	Active	Active	Non-active	Active
54676086	CCC(C(=O)NC/C=C/C=C(\C)/C(C(C)C1C(C(C(O1)/C=C/C=C/C=C(\C)/C(=C\2/C(=O)C=CN(C2=O)C)/O)O)O)OC)C3(C(C(C(C(O3)/C=C/C=C/C)(C)C)OC4C(C(C(C(O4)C)OC5C(C(C(C(O5)C)OC)O)OC)OC)O)O)O	Active	Non-active	Active	Active	Non-active	Active
125715	CCC1(C(C2=C(C3=C(C(=C2C(O1)OC4CC(C(C(O4)C)OC5CC(C(C(O5)C)OC6CCC(C(O6)C)O)O)N(C)C)O)C(=O)C7=C(C3=O)C=CC=C7O)O)CC8CC(C(C(O8)C)OC9CC(C(C(O9)C)OC1CCC(C(O1)C)O)O)N(C)C)O	Active	Non-active	Active	Active	Non-active	Active
121578	C=C1[C@H]([C@H]([C@](O1)(CO)N2C=NC3=C2N=CN=C3N)O)O	Active	Non-active	Active	Active	Non-active	Active
54676871	C[C@@H](C(=O)N[C@@H]1[C@@H]2[C@H]([C@@H](CC(=C2C(=O)O[C@]1(C)C(Cl)Cl)O)O)O)N	Active	Non-active	Active	Active	Non-active	Active
37614	CON1C=C(C(=O)C2=CC3=C(C=C21)OCO3)C(=O)O	Active	Non-active	Active	Active	Active	Non-active
47500	COC1(NC(=O)C(C(O)=O)C2=CC=C(O)C=C2)C2OCC(CSC3=NN=NN3C)=C(N2C1=O)C(O)=O	Active	Non-active	Active	Active	Non-active	Active
5282060	CC1=CC(=C2C3=C4C(=CC(=C13)O)C(C(=O)C5=C(C=C(C(=C45)C2=O)O)O)(C)C)O	Active	Non-active	Active	Active	Non-active	Active
163935	CC1=C[C@H]([C@H]2[C@@](C1)(CC[C@@]34[C@@]2(O3)[C@H](C5=C(C4=O)C(=CC=C5)O)O)O)O	Active	Non-active	Active	Active	Non-active	Active
159908	CC[C@]1(C[C@@H](C2=C([C@H]1C(=O)OC)C=C3C(=C2O)C(=O)C4=C(C=CC(=C4C3=O)O)O)O)O	Active	Non-active	Active	Active	Non-active	Active
54682466	CCC(C(=O)NC/C=C/C=C(\C)/C(C(C)C1C(C(C(O1)/C=C/C=C/C=C(\C)/C(=C\2/C(=O)C=CNC2=O)/O)O)O)OC)C3(C(C(C(C(O3)/C=C/C=C/C)(C)C)O)O)O	Active	Non-active	Active	Active	Non-active	Active
73305	C1C[C@H]([C@H](C1)N)C(=O)O	Active	Non-active	Active	Non-active	Non-active	Non-active
6419898	C[C@@H]1C/C=C/C=C/[C@@H]([C@@H](C[C@@H]([C@@H]([C@H]([C@@H](CC(=O)O1)O)OC)OC2C(C(C(C(O2)C)OC3CC(C(C(O3)C)O)(C)O)N(C)C)O)CC=O)C)OC4CCC(C(O4)C)N(C)C	Active	Non-active	Active	Active	Non-active	Active
194622	CC[C@@H]1[C@H]2CC(=C(N2C1=O)C(=O)O)SCCN	Active	Non-active	Active	Active	Non-active	Active
3063875	NC(CCOC1=CC=C(C=C1)C(O)C(=O)NC1(CN(C(C(O)=O)C2=CC=C(O)C=C2)C1=O)NC=O)C([O-])=O	Active	Non-active	Active	Active	Non-active	Active
6442025	CC[C@@H]1[C@H]2CC(=C(N2C1=O)C(=O)O)S/C=C/NC(=O)C	Active	Non-active	Active	Active	Non-active	Active
445629	CC1=C(S[C@](C1=O)(C)/C=C(\C)/C=C)O	Active	Non-active	Active	Non-active	Non-active	Active
5746282	COCCOC(=O)CCCN/C(=C\1/C=C(C=CC1=O)F)/C2=CC=C(C=C2)Cl	Active	Non-active	Active	Active	Active	Non-active
198272	CC1(COC(C(C1NC)O)OC2C(CC(C(C2O)OC3C(C(C(C(O3)CN)O)O)N)N)N)O	Active	Non-active	Active	Active	Non-active	Active
173326	CC(C(C1C(C(C(C(O1)SC)O)O)O)NC(=O)C2CCCN2C)OC	Active	Non-active	Active	Active	Non-active	Active
5382853	CCC(=O)O[C@@H]1CC(=O)O[C@@H](C/C=C/C=C/[C@@H]([C@@H](C[C@@H]([C@@H]([C@H]1OC)OC2C(C(C(C(O2)C)OC3CC(C(C(O3)C)OC(=O)CC)(C)O)N(C)C)O)CC=O)C)O)C	Active	Non-active	Active	Active	Non-active	Active
73069	C1=NC2=C(N1O)C(=O)N=C(N2)N	Active	Non-active	Active	Active	Active	Non-active
72510	COC1=CC=CC2=C1N(C3=CC=CC(=O)C3=[N+]2[O-])O	Active	Non-active	Active	Active	Active	Non-active
122105	CCCC1=C(C(=O)NC2=C1C(=O)C3=C(C2=O)NC(=O)C(=C3CCC)C)C	Active	Non-active	Active	Active	Non-active	Non-active
3084738	CCC(C)CCCCC(CC(=O)N[C@H]1CCNC(=O)[C@@H](NC(=O)[C@@H](NC(=O)[C@@H](NC(=O)[C@@H](NC(=O)[C@@H](NC(=O)[C@@H](NC(=O)[C@@H](NC1=O)CCN)CCN)CC(C)C)CC(C)C)CCN)CCN)CC(C)C)O	Active	Non-active	Active	Active	Non-active	Active
174676	CC[C@@H]1[C@@H]([C@@H]([C@H](O[C@]1(C)O)[C@@H](C)[C@@H]([C@H](C)C(=O)[C@H](CC)[C@@H]2[C@H](C[C@@](O2)(C)[C@]3([C@@H](C[C@](O3)(CC)[C@H](CC)O)C)O)C)O)C)O	Active	Non-active	Active	Active	Non-active	Active
107869	CCC1(CC(C2=C(C3=C(C(=C2C1O)O)C(=O)C4=C(C3=O)C(=CC=C4)O)O)OC5CC(C(C(O5)C)O)N6CCOCC6)O	Active	Non-active	Active	Active	Non-active	Active
5462314	C[C@@H](C(=O)N[C@@H](C)C(=O)O)NC(=O)[C@H](CCP(=O)(C)O)N	Active	Non-active	Active	Active	Non-active	Non-active
308142	CC[C@]1(C[C@@H](C2=C([C@H]1C(=O)OC)C=C3C(=C2O)C(=O)C4=C(C3=O)C=CC=C4O)OC5CC(C(C(O5)C)OC6CC7C(C(O6)C)OC8C(O7)CC(=O)C(O8)C)N(C)C)O	Active	Non-active	Active	Active	Active	Active
6441233	CCC1C(C2C(O2)(/C=C/C(=O)C(CC(C(C(C(CC(=O)O1)O)C)OC3C(C(CC(O3)C)N(C)C)O)C/C=C/C(=O)C)C)C)C	Active	Non-active	Active	Active	Non-active	Active
6441232	CCC1C(C2C(O2)(/C=C/C(=O)C(CC(C(C(C(CC(=O)O1)O)C)OC3C(C(CC(O3)C)N(C)C)O)CC(O)SCC(C(=O)O)N)C)C)C	Active	Non-active	Active	Active	Non-active	Active
24834015	C1[C@](C(=O)N1[C@H](C2=CC=C(C=C2)O)C(=O)O)(NC=O)NC(=O)[C@@H](C3=CC=C(C=C3)OCC[C@H](C(=O)O)N)O	Active	Non-active	Active	Active	Non-active	Active
6444398	CC1CCC(C(C(CC(C(C(CC=C(C(C(C(=O)OC(C(C=CC=CC(C(C(CC(CC(CC(CC2CC(C(C(O2)(CC1O)O)O)O)OC(=O)CC(=O)O)O)O)O)C)O)C)C(C)C/C(=C/CCCCCNC(=NC)NC)/C)C)O)C)O)C)O)O)C)O	Active	Non-active	Active	Active	Non-active	Active
44140635	C[C@H]1C=CC(=O)O[C@H]1/C=C/C(=C/[C@H](C)C/C=C/C(=C/[C@@H](C)C(=O)[C@@H](C)[C@@H]([C@@H](C)C/C(=C/C(=O)O)/C)O)/C)/C	Active	Non-active	Active	Active	Non-active	Active
6441582	CC1C(C(C(C(O1)OC/C(=C/2\C(C(C(O2)OC3=CC=C(C=C3)/C=C(\C)/C(=O)NC4C(OC(C4O)N5C=NC6=C5N=CN=C6N(C)C)CO)O)O)/OC)O)OC)OC	Active	Non-active	Active	Active	Non-active	Active
6444216	CC/C=C\1/CC2C(NC3=C(C=C(C=C3)OC4C(C(C(C(O4)C)NC)(C)O)O)C(=O)N2C1)OC	Active	Non-active	Active	Active	Non-active	Active
5604	C1=CN(C2=C1C(=NC=N2)N)C3C(C(C(O3)CO)O)O	Active	Non-active	Active	Active	Non-active	Active
3050375	CC(C1C(C(C(C(O1)OC2C(CC(C(C2O)OC3C(C(C(CO3)O)NC)O)N)N)N)O)O)O	Active	Non-active	Active	Active	Non-active	Active
51036	CC1=C(C(=O)C2=C(C1=O)N3CC4C([C@@]3([C@@H]2COC(=O)N)OC)N4)NC5=CC=C(C=C5)O	Active	Non-active	Active	Active	Non-active	Active
126335	C1[C@@H](CN2[C@]1(C=CC2=N)O)Cl	Active	Non-active	Active	Non-active	Non-active	Non-active
16129725	CC(C)([C@H]1C(=O)OC[C@H](C(=O)N2C([C@H](CC=N2)O)C(=O)NCC(=O)N(CC(=O)N([C@H](C(=O)OC[C@H](C(=O)N3C([C@H](CC=N3)O)C(=O)NCC(=O)N(CC(=O)N1C)C)NC(=O)C4=C(C=C5C=C(C=CC5=N4)OC)O)C(C)(C)O)C)C)NC(=O)C6=C(C=C7C=C(C=CC7=N6)OC)O)O	Active	Non-active	Active	Active	Non-active	Active
31669	C[C@H]1C(O1)P(=O)(O)O	Active	Non-active	Active	Non-active	Non-active	Active
171612	CCC(C(C(C(C)C(=O)NC(CC(C)C)C1CC2=C(C(=CC=C2)O)C(=O)O1)O)O)N	Active	Non-active	Active	Active	Non-active	Active
6438636	CCCC(C)/C=C(\C)/C(C(C)/C=C/CCC(C(C)C(C(C)C(C(C)C1C(CCC(O1)C(C)C(=O)O)C)O)O)O)O	Active	Non-active	Active	Active	Non-active	Active
5476484	CC1C(C(=O)NC(C(=O)NC(C(=O)NCC(=O)N2CCC(C2C(=O)N/C(=C\C3=CNC4=CC=CC=C43)/C(=O)NC(C(=O)NC(C(=O)N5CCC(C5C(=O)O1)O)C(C(C)C)O)C(C)C6=CNC7=CC=CC=C76)O)C)C(C)O)NC(=O)C(CO)NC(=O)CC(C(=O)O)N	Active	Non-active	Active	Active	Non-active	Active
442757	C[C@H]1C2=C(C[C@@H](O1)CC(=O)O)C(=O)C3=C(C2=O)C(=CC=C3)O	Active	Non-active	Active	Active	Non-active	Active
175496	C#C[C@@H](C(=O)O)N	Active	Non-active	Active	Non-active	Active	Non-active
151143	C=CC1=CC(OC1=O)O	Active	Non-active	Active	Non-active	Non-active	Non-active
120350	CC1=CC(=CC=C1)N=C=NC2=CC=CC(=C2)C	Active	Non-active	Active	Non-active	Active	Non-active
6439593	C/C=C\1/CC2C=NC3=CC=CC=C3C(=O)N2C1	Active	Non-active	Active	Non-active	Active	Non-active
5352062	C/C=C\1/C(=O)N[C@H](C(=O)O[C@H]\2CC(=O)N[C@@H](C(=O)N[C@H](CSSCC/C=C2)C(=O)N1)C(C)C)C(C)C	Active	Non-active	Active	Active	Non-active	Active
3086466	C[C@H]1[C@H]([C@H](C[C@@H](O1)O[C@H]2C[C@@](CC3=C(C4=C(C(=C23)O)C(=O)C5=C(C4=O)C=CC=C5O)O)(C(=O)C)O)N)OC(C[C@H](C)O)O[C@@H](C)C=O	Active	Active	Active	Active	Non-active	Active
43559	CC(=O)NNC1=CC(=C(C=C1)O)C=O	Active	Non-active	Active	Non-active	Active	Non-active
19822	C[C@H]1C[C@]2(CO2)C(=O)[C@@H]([C@H]([C@H]([C@H](OC(=O)[C@@H]([C@H]([C@@H]([C@H]1OC3C(C(CC(O3)C)N(C)C)O)C)OC4CC(C(C(O4)C)O)OC)C)C)C)O)C	Active	Non-active	Active	Active	Non-active	Active
207996	C1C(C(C(C(C1N)O)OC2C3C(C(C(O2)CO)O)OC4(O3)C(C(C(C(O4)C(CO)N)O)O)O)O)N	Active	Non-active	Active	Active	Non-active	Active
159643	CNCC(=O)NC(CO)C(=O)NC1C(C(C(OC1C(=O)N)N2C=CC(=NC2=O)N)O)O	Active	Non-active	Active	Active	Non-active	Active
23674734	CO[C@]1(NC(=O)CSCC(N)C(O)=O)[C@H]2SCC(CSC3=NN=NN3C)=C(N2C1=O)C(O)=O	Active	Non-active	Active	Active	Non-active	Active
3041261	CNC1C(COC(C1O)OC2C(CC(C(C2O)OC3C(CC=C(O3)CN)N)N)N)O	Active	Non-active	Active	Active	Non-active	Active
43186	C1=C[C@@H]([C@H](C(=C1)C=O)N)O	Active	Non-active	Active	Non-active	Non-active	Active
122676	CNC[C@@H]1C[C@@H]([C@H]([C@H](O1)O[C@@H]2[C@H](C[C@H]([C@@H]([C@H]2O)O[C@@H]3[C@@H]([C@H]([C@@H]([C@H](O3)CO)O)N)O)NC(=O)[C@H](CCN)O)N)O)O	Active	Non-active	Active	Active	Non-active	Active
6448310	CC(CCCCCCCC(CC1CCCCCCCCCCCC(CC(CCCCCCCCCCC/C=C/C(=O)O1)OS(=O)(=O)O)OS(=O)(=O)O)OS(=O)(=O)O)OS(=O)(=O)O	Active	Non-active	Active	Active	Non-active	Active
197034	C1[C@H]([C@@H]2[C@@H](C(=O)N1)N=C(N2)N[C@H]3[C@@H]([C@@H]([C@H]([C@H](O3)CO)OC(=O)N)O)NC(=O)C[C@H](CCCN)N)O	Active	Non-active	Active	Active	Non-active	Active
130579	C1C(O1)C(C(C(C(C(C2CO2)O)O)O)O)O	Active	Non-active	Active	Active	Non-active	Non-active
128335	C1=CC(=O)C(C1=O)(CO)O	Active	Non-active	Active	Non-active	Non-active	Active
54702959	C/C=C(\C)/C(=O)OC1C(OC(CC1O)C2=C(C3=C(C=C2)C(C4CC5C(C(=O)C(=C(C5(C(=O)C4=C3O)OC)O)C(=O)N)OC(=O)C6=CC=CC=C6O)(C)OC)O)C	Active	Non-active	Active	Active	Non-active	Active
3051225	C1C(C(OC1N2C=NC3=C2N=CN=C3N)CC(CCC(C(=O)N)NC(=O)N)N)O	Active	Non-active	Active	Active	Non-active	Active
65345	CC([C@@H]1CC[C@H]([C@H](O1)O[C@@H]2[C@H]([C@@H]([C@@H]([C@H]([C@H]2O)N(C)C(=O)CN)OC)O)N)N)N	Active	Non-active	Active	Active	Non-active	Active
6439619	CC(CC(C)C=C(C)C)/C=C/C(=O)NC1=CC(C2C(C1=O)O2)(CCCCC(=O)O)O	Active	Non-active	Active	Active	Non-active	Non-active
3042009	CCC1(CCC(O1)C2(CCC3(O2)CC(C(C(O3)C(C)C(C(C)C(=O)O)OC)C)O)C)C4C(CC(O4)C5C(CC(C(O5)(COC6C(C(C(C(O6)CO)O)O)O)O)C)C)C	Active	Non-active	Active	Active	Non-active	Active
443111	C[C@@H]1C=CC(=O)NCC=CC(=C[C@H](CC(=O)CC2=NC(=CO2)C(=O)N3CCC=C3C(=O)O[C@@H]1C(C)C)O)C	Active	Non-active	Active	Active	Non-active	Active
198211	CC1=NN=C(S1)SCC2=C(N3C(C(C3=O)NC(=O)CN=C(CC4=CC=CC=C4)N)SC2)C(=O)O	Active	Non-active	Active	Active	Non-active	Active
173594	CC(C(=O)O)NC(=O)C(CCCC(CO)(C(=O)O)N)N	Active	Non-active	Active	Active	Non-active	Active
156388	CC1=CC(=C(C(=C1)C(=O)O)C2=CC(=O)C3=C(C2=O)C=CC=C3O)OC	Active	Non-active	Active	Active	Non-active	Active
130757	CC1=CC(=O)[C@@H]2C3=C(CC[C@@]2(C1)O)C(=O)C4=C(C3=O)C=CC=C4O	Active	Non-active	Active	Active	Non-active	Active
6448029	CC1=C(C=C2C(=C1O)C(=O)[C@]3([C@@](C2=O)(O3)C/C=C(\C)/CCC=C(C)C)CC=C(C)C)O	Active	Non-active	Active	Active	Non-active	Non-active
6437832	C/C=C\C(=O)O[C@@H]1C[C@@H]2[C@]3(C1([C@@]4([C@H](O2)C=C([C@H]5[C@@H]4O5)C)C)C)CO3	Active	Non-active	Active	Non-active	Non-active	Non-active
5489358	C1=CC2=C(C=C1O)ONC2=O	Active	Non-active	Active	Active	Active	Non-active
41818	CC1=CC(=O)CC2(C1(C=CC3=C2C(=O)C4=C(C3=O)C(=CC=C4)O)O)O	Active	Non-active	Active	Active	Non-active	Active
40117	COC1=C(N2[C@H]([C@H](C2=O)NC(=O)C(C3C=CCC=C3)N)SC1)C(=O)O	Active	Non-active	Active	Active	Non-active	Active
198349	CC1([C@@H](N2[C@H](S1)[C@@H](C2=O)NC(=O)CSC[C@H](C(=O)O)N)C(=O)O)C	Active	Non-active	Active	Active	Non-active	Active
207169	CN1C[C@H]([C@@H]2[C@@H](C1=O)N=C(N2)N[C@H]3[C@@H]([C@@H]([C@H]([C@H](O3)CO)OC(=O)N)O)N(C)C(=O)CN=CN)O	Active	Non-active	Active	Active	Non-active	Active
153510	CC1C(C(CC(O1)OC2CC(CC3=C(C4=C(C(=C23)O)C(=O)C5=C(C4=O)C=CC=C5OC)O)(C(C)O)O)N)O	Active	Non-active	Active	Active	Non-active	Active
73359	CC[C@H]1[C@](CC[C@@H](O1)[C@@]2(C[C@H]([C@@](O2)([C@@]3(CC[C@H](O3)[C@H]([C@]4([C@@H](C[C@@H]([C@H](O4)C[C@@]5([C@H](CC[C@@H](O5)[C@@H](C)[C@@H](C[C@H]6[C@@H](C[C@@H]([C@H](O6)[C@@H](C)C(=O)O)C)C)O)C)O)C)C)O)O)C)O)C)C)(C)O	Active	Non-active	Active	Active	Non-active	Active
6441411	CCC(=O)OC1C(OC(CC1(C)O)OC2C(OC(C(C2N(C)C)O)OC3C(CC(C(/C=C\C=C\CC(OC(=O)CC(C3OC)OC(=O)C)C)O)C)CC=O)C)C	Active	Non-active	Active	Active	Non-active	Active
6441139	C/C=C(\C)/[C@@H]1[C@@]2([C@H]3C=C[C@H]4C[C@H](CC[C@@H]4[C@]3(C(O1)(O2)[C@]5(C(=O)C(=C)OC5=O)OC(=O)C)C)C(=O)O)C	Active	Non-active	Active	Active	Non-active	Active
193737	C1=COC(=CC1=O)C2=C[C@@H]3[C@@H](O3)[C@H]4[C@@H]2O4	Active	Non-active	Active	Active	Non-active	Active
173950	[C@@H]12[C@@H](O1)C(=O)C(=C(C2=O)C(=O)N)N	Active	Non-active	Active	Active	Non-active	Active
6446339	CC1/C=C/C=C/C=C/C=C/C=C/C=C/C=C/C(CC2C(C(CC(O2)(CC(CC(CC(CC(CC(CC(CC(=O)OC1C(C)CCC(CC(=O)C3=CC=C(C=C3)NC)O)O)O)O)O)O)O)O)O)C(=O)O)OC4C(C(C(C(O4)C)OC5C(C(C(C(O5)CO)O)O)O)N)O	Active	Non-active	Active	Active	Non-active	Active
3058081	CCCCC1C(C(=O)N(C(C(=O)NC(C(=O)NC(C(=O)NC(C(=O)NCC(=O)O1)C(C)O)CO)C(C)CC)CC(C)C)C)C	Active	Non-active	Active	Active	Active	Active
3053232	CCCCCCCC[C@H](C(=C)C(=O)N(C)[C@](CC(C)C)(C=O)C(=O)CNC(=O)[C@H]([C@H](C)O)NC(=O)[C@H](CO)NC(=O)[C@H]([C@H](C)CC)N)O	Active	Non-active	Active	Active	Active	Non-active
3033455	CCC/C(=C/1\CC1C2=C(C(=O)C3=CC=CC=C3N2)C)/C	Active	Non-active	Active	Non-active	Active	Non-active
354577	CC(C1C(C(C(C(O1)OC2C(CC(C(C2O)OC3C(C(C(CO3)(C)O)NC)O)N)N)N)O)O)O	Active	Non-active	Active	Active	Non-active	Active
3052400	CC(C1CCC(C(O1)OC2C(CC(C(C2O)N(C)C(=O)CNC(=O)N)OC)N)N)N	Active	Non-active	Active	Active	Non-active	Active
163743	CCC1(CC(C2=C(C1)C=C3C(=C2O)C(=O)C4=C(C3=O)C=CC=C4O)OC5CC(C(C(O5)C)O)N6CCOCC6)O	Active	Non-active	Active	Active	Non-active	Active
162204	CC(=O)N(CCCP(=O)(O)O)O	Active	Non-active	Active	Non-active	Non-active	Non-active
130513	C1[C@@H]2[C@@H](N2)[C@]3([C@H](C4=C(N1O3)C=C(C=C4O)C=O)COC(=O)N)O	Active	Non-active	Active	Active	Non-active	Active
6450899	C[C@H]1/C=C/C=C(\C(=O)NC\2=C(C3=C(C(=C4C(=C3C(=O)/C2=C/NN5CCN(CC5)C/C=C/C6=CC=CC=C6)C(=O)[C@](O4)(O/C=C/[C@@H]([C@H]([C@H]([C@@H]([C@@H]([C@@H]([C@H]1O)C)O)C)OC(=O)C)C)OC)C)C)O)O)/C	Active	Non-active	Active	Active	Non-active	Active
6436037	CC[C@@H]1C(=CC[C@@H](O1)/C(=C/[C@H](C)/C=C/[C@H]2[C@H]([C@@H]2/C=C/C3[C@@H]([C@H](C[C@H](O3)CC(=O)O)O)O)C)/C)C	Active	Non-active	Active	Active	Non-active	Active
209700	C([C@@H]1[C@H]([C@@H]([C@H]([C@H](O1)O[C@@H]2[C@@H]([C@H]([C@@H]([C@H](O2)CO)O)O)O)N)O)O)O	Active	Non-active	Active	Active	Non-active	Active
165157	C1[C@H]([C@@H]2[C@@H](C(=O)N1)N=C(N2)N[C@H]3[C@@H]([C@@H]([C@H]([C@H](O3)CO)OC(=O)N)O)NC(=O)C[C@H](CCCNC(=O)C[C@H](CCCNC(=O)C[C@H](CCCNC(=O)C[C@H](CCCN)N)N)N)N)O	Active	Non-active	Active	Active	Non-active	Active
164141	CC1C=CC(CC(CC(CC(CC(CC(CC(C(C(CC=CC=CC=CC=CC=CC(=O)OC1C(C)C)O)C)O)O)O)O)O)O)O	Active	Non-active	Active	Active	Non-active	Active
33701	CC1C(COC1O)C(=O)C	Active	Non-active	Active	Non-active	Non-active	Non-active
3034040	C[C@H]1[C@@]([C@H](CC(O1)O[C@H]2[C@H]([C@@H](O[C@@H]([C@H]2OC(=O)C(C(C)SC[C@@H](C(=O)O)NC(=O)C)NC(=S)SC[C@@H](C(=O)O)NC(=O)C)COC(=O)C)[C@]3(CC(=O)C(=C(C3=O)C(=O)O)N)O)O)OC)([C@H](C)OC(=O)C(C)C)O	Active	Non-active	Active	Active	Non-active	Active
6447181	CCC1C2CC(=C(N2C1=O)C(=O)OC(C3=CC=CC=C3)(C4=CC=CC=C4)C5=CC=CC=C5)S/C=C/NC(=O)C	Active	Non-active	Active	Active	Non-active	Active
3085083	CC[C@@H](C)C(C(=O)O)NC(=O)C(CC1=CNC2=CC=CC=C21)NC(=O)C(CO)NC(=O)C([C@@H](C)O)NC(=O)C(CC(CCN)O)NC(=O)C(CC(=O)N)NC(=O)C(CC(=O)N)NC(=O)C(C(C)C)NC(=O)C(C(C)C)NC(=O)C(CC(=O)N)NC(=O)CC(CCCCCC(C)C)O	Active	Non-active	Active	Active	Non-active	Active
3063700	C([C@@H]1[C@H]([C@@H]([C@H](C(O1)OC2[C@H]([C@H]([C@@H]([C@H](O2)CO)O)O)O)N)O)O)O	Active	Non-active	Active	Active	Non-active	Active
3055594	CC(C)C1C2CC(=C(N2C1=O)C(=O)OC(C3=CC=CC=C3)(C4=CC=CC=C4)C5=CC=CC=C5)SCCNC(=O)C	Active	Non-active	Active	Active	Non-active	Active
158486	CN1[C@H]2C[C@H]([C@@H]1[C@@H]3CC4=C([C@H]5N3[C@@H]2OC5)C(=CC=C4)OC)C(=O)O	Active	Non-active	Active	Active	Non-active	Active
115369	COC1=C(C(=C2C(=C1)C=C(N2)C(=O)N3C[C@H]4C[C@@]45C3=CC(=O)C6=C5C=C(N6)C(=O)OC)OC)OC	Active	Non-active	Active	Active	Non-active	Active
3035536	C[C@@H]1[C@H]([C@@H](CC(O1)C2=CC3=C(C=C2)C(=O)C4=C(C3=O)[C@H](O[C@H]5[C@@H]4OC(=O)C5)C)N(C)C)O	Active	Non-active	Active	Active	Non-active	Active
6185	C[C@]12CC[C@H]3[C@H]([C@]1(CC[C@@H]2C4=CC(=O)OC4)O)CC[C@]5([C@@]3(CC[C@@H](C5)O)C=O)O	Active	Non-active	Active	Active	Active	Non-active
171120	CC1=C[C@H]([C@@H]2[C@H](C1=O)O2)O	Active	Non-active	Active	Non-active	Non-active	Active
161909	CC[C@H]1[C@](CC[C@@H](O1)[C@@]2(C[C@H]([C@@](O2)([C@]3(CCC(O3)C([C@]4([C@@H](C[C@@H]([C@H](O4)C[C@@]5([C@H](CCC(O5)[C@@H](C)[C@@H](C[C@H]6CC[C@@H]([C@H](O6)[C@@H](C)C(=O)O)C)O)C)O)C)C)O)O)C)O)C)C)(C)O	Active	Non-active	Active	Active	Non-active	Active
6447534	CC1C2CC(C(/C=C/C=C(/CC3=CC(=C(C(=C3)OC)Cl)NC(=O)CC(C4(C1O4)C)OC(=O)CC(C)C)\C)OC)(NC(=O)O2)O	Active	Non-active	Active	Active	Non-active	Active
6447532	CCC(=O)OC1CC(=O)NC2=C(C(=CC(=C2)C/C(=C/C=C/C(C3(CC(C(C4C1(O4)C)C)OC(=O)N3)O)OC)/C)OC)Cl	Active	Non-active	Active	Active	Non-active	Active
6440815	CC1C(C(C(C(O1)OC(C)C(/C=C/C=C/C=C/C(=O)C(C)C(C(C)C2C/C=C/C=C/C=C/C(C(=O)/C(=C\C=C/C(=C/C(/C(=C/CC(=O)O2)/C)O)/C)/C)O)O)O)OC)O)OC	Active	Non-active	Active	Active	Non-active	Active
3075266	CC(C)([C@@H](C(=O)OCC1=CC=C(C2=NC3=C(C=CC=C3N=C12)C(=O)O)OC)N)O	Active	Non-active	Active	Active	Active	Non-active
6447675	C[C@H]1[C@H](C/C=C\C=C/C=C\[C@@H](CC(=O)NC2=C(C(=CC(=C2)O)CC/C=C(\[C@@H]1O)/C)O)OC)OC(=O)[C@@H](C)NC(=O)C3CCCCC3	Active	Non-active	Active	Active	Non-active	Active
3067465	CC1C(C(CC(O1)OC2CC(C(=O)C3=C(C4=C5C(=C(C=C4C(=C23)OC)C)C6C7C(O5)(C8(CO8)C(O6)(O7)C(OC)OC)OC9CC(C(C(O9)C)(C(=O)C)O)O)O)O)(C)O)OC(=O)C	Active	Non-active	Active	Active	Non-active	Active
5360807	CC[C@H]([C@@H]1[C@H](C[C@@](O1)(CC)[C@H]2CC[C@@]([C@@H](O2)C)(CC)O)C)C(=O)[C@@H](C)[C@H]([C@H](C)CCC3=C(C(=C(C=C3)C)O)C(=O)O)O	Active	Non-active	Active	Non-active	Non-active	Active
160175	C[C@@H](C(=O)OC(=O)[C@H](CC1CCC(=O)[C@H]2[C@@H]1O2)N)N	Active	Non-active	Active	Non-active	Non-active	Active
125623	C1=NC2=C(N1[C@H]3[C@@H]([C@@H]([C@H](O3)COS(=O)(=O)N)O)O)N=C(N=C2N)Cl	Active	Non-active	Active	Non-active	Active	Non-active
73623	CC=CC(=CC(C)C(=O)CC(CC1CC(=O)NC(=O)C1)O)C	Active	Non-active	Active	Active	Non-active	Active
6442058	CC1CC(C(OC1C2CC(C3(O2)C(C(CC(O3)C4(CCC5(O4)CC(C(C(O5)C(C)/C=C(\C)/C(=O)C(C)CC(C)C(=O)O)C)O)C)OC6CCC(C(O6)C)OC)C)C)(C)O)C	Active	Non-active	Active	Non-active	Non-active	Non-active
6439253	CCC1=C(S[C@](C1=O)(CC)/C=C(\C)/C=C)O	Active	Non-active	Active	Active	Non-active	Non-active
66365	C1=CN(C(=O)N=C1N)C2C(C(C(C(O2)C(C(C(C(C(CO)O)O)O)O)OC3C(C(C(C(O3)CO)O)N)O)N)O)O	Active	Non-active	Active	Non-active	Active	Non-active
47625	COC1=CC(=O)C(=CC=C1)O	Active	Non-active	Active	Active	Active	Non-active
29843	C[C@@H]1[C@@]2([C@@H](C[C@H](O1)C3=C2C(=O)C4=C(C3=O)C(=C5[C@H]6[C@H](CC(=O)O6)OC(C5=C4O)C)O)O)O	Active	Active	Active	Active	Non-active	Active
151542	CC1=C(N=C(N=C1N)C(CC(=O)N)NCC(C(=O)N)N)C(=O)NC(C(C2=CN=CN2)OC3C(C(C(C(O3)CO)O)O)OC4C(C(C(C(O4)CO)O)OC(=O)N)O)C(=O)NC(C)C(C(C)C(=O)NC(C(C)O)C(=O)NCCC5=NC(=CS5)C6=NC(=CS6)C(=O)NCCCNCCCNC(=O)CCC(=O)O)O	Active	Non-active	Active	Active	Active	Active
72299	C1=NC2=C(C(=N1)N)N=CN2[C@H]3[C@@H]([C@@H]([C@](O3)(COS(=O)(=O)N)F)O)O	Active	Non-active	Active	Non-active	Active	Non-active
5970690	C1=CC=C(C=C1)CC(=O)NC(=O)/C=C/C(=O)N	Active	Non-active	Active	Active	Non-active	Active
206350	CCC1C(C(C(C(=O)C(CC(C(C(C(C(C(=O)O1)C)OC2CC(C(C(O2)C)OC(=O)C)(C)OC(=O)C)C)OC3C(C(CC(O3)C)N(C)C)O)(C)OC4C(C(CC(O4)C)N(C)C)O)C)C)O)(C)O	Active	Non-active	Active	Active	Non-active	Non-active
157916	CC1C(C(CC(O1)OC23C4C(C5=C(C=C6C(=C5O2)C(=C7C(=O)C(CC(C7=C6OC)OC8CC(C(OC8)(C)OC(=O)C)(C)O)O)O)C)OC(C39CO9)(O4)C(OC)OC)O)(C(C)O)O	Active	Non-active	Active	Active	Non-active	Active
54695530	CC1CC(C(C2C1C\3(C(C=C2)/C(=C\CC(/C(=C/C4C(C=C(CC45C(=O)/C(=C3\O)/C(=O)O5)C=O)O)/C)OC6CC(C(C(O6)C)NC(=O)OC)(C)[N+](=O)[O-])/C)C)OC7CC(C(C(O7)C)OC(=O)C)OC8CC(C(OC8)C)OC9CC(C(C(O9)C)O)O)C	Active	Non-active	Active	Active	Non-active	Active
6441157	CC1/C=C/C=C(\C(=O)NC2=C(C(=O)C3=C(C2=O)C(=C(C(=C3C(=O)/C(=C\C(C(C(C(C(C(C(C1O)C)O)C(=O)OC)O)C)O)C)/C)OC)C)O)SC)/C	Active	Non-active	Active	Active	Non-active	Active
3080245	CCC(C)C1C(=O)N(C(C(=O)NC(C(=O)N(C(C(=O)OC(C(=O)N(C(C(=O)NC(C(=O)N(C(C(=O)N2CCCC2C(=O)N1)CC3=CC=CC=C3)C)CC4=CC=CC=C4)C(C)C)C)C(C)CC)C(C)C)C)CC(C)C)C(C)C)C	Active	Non-active	Active	Active	Non-active	Active
3051955	CC1(C(CC2=C(C1=O)C=C3C(=C2O)C(=O)C4=C(C3=O)C=CC=C4O)OC)O	Active	Non-active	Active	Active	Non-active	Active
5649	CC1C(=O)NC(C(=O)OC(C(=O)NC(C(=O)OC(C(=O)NC(C(=O)OC(C(=O)NC(C(=O)OC(C(=O)NC(C(=O)OC(C(=O)NC(C(=O)O1)C(C)C)C(C)C)C(C)C)C)C(C)C)C(C)C)C(C)C)C)C(C)C)C(C)C)C(C)C	Active	Non-active	Active	Active	Non-active	Active
207889	C1[C@H]([C@@H]([C@H]([C@@H]([C@H]1N)O[C@@H]2[C@@H]([C@H]([C@@H]([C@H](O2)CN)O)O)O)O)O)N	Active	Non-active	Active	Active	Non-active	Active
197183	CCCCCCC1=C(C=C(C=C1O)CCC)O	Active	Non-active	Active	Active	Non-active	Active
175619	CCC1(CC(C2=C(C1OC3CC(C(C(O3)C)OC4CC5C(C(O4)C)OC6C(O5)CC(=O)C(O6)C)N(C)C)C(=C7C(=C2)C(=O)C8=C(C7=O)C=CC=C8O)O)OC9CC(C(C(O9)C)OC1CC2C(C(O1)C)OC1C(O2)CC(=O)C(O1)C)N(C)C)O	Active	Non-active	Active	Active	Non-active	Non-active
161704	CC(=CC(C1=C[C@H]([C@H]2[C@@H](C1=O)O2)O)O)C	Active	Non-active	Active	Active	Non-active	Active
160718	C1[C@H]([C@@H]2[C@@H](C(=O)N1)N=C(N2)N[C@H]3[C@@H]([C@@H]([C@H]([C@H](O3)CO)OC(=O)N)O)NC(=O)C[C@H](CCCNC(=O)C[C@H](CCCN)N)N)O	Active	Non-active	Active	Active	Non-active	Active
128589	C1C(C2=C(NC=N1)N(C=N2)C3C=C(C(C3O)O)CO)O	Active	Non-active	Active	Active	Non-active	Active
128567	C[C@@H]1CCC2([C@@H](C[C@H]([C@H](O2)[C@H](C)C(=O)C3=CC=CN3)C)C)O[C@@H]1CC4=NC5=C(O4)C=CC(=C5C(=O)O)O	Active	Non-active	Active	Active	Non-active	Active
73240	CC1=CNC2=C1C34CC3CN(C4=CC2=O)C(=O)C5=CC6=C7CCN(C7=C(C(=C6N5)OC)O)C(=O)C8=CC9=C1CCN(C1=C(C(=C9N8)OC)O)C(=O)N	Active	Non-active	Active	Non-active	Non-active	Non-active
23685776	CC(C)C(N)C(=O)NC(C(O)=O)C(\Cl)=C\C(O)=O	Active	Non-active	Active	Active	Non-active	Active
6446264	CCCC(=O)OC1C(OC(CC1(C)O)OC2C(OC(C(C2N(C)C)O)OC3C(CC(C(/C=C/C4C(O4)CC(OC(=O)CC(C3OC)OC(=O)CC)C)O)C)CC=O)C)C	Active	Non-active	Active	Active	Non-active	Active
6445462	CCC(=O)OC1CC(=O)OC(CC2C(O2)/C=C/C(C(CC(C(C1OC)OC3C(C(C(C(O3)C)OC4CC(C(C(O4)C)OC(=O)C)(C)O)N(C)C)O)CC=O)C)O)C	Active	Non-active	Active	Active	Non-active	Active
6441441	C[C@@H]1[C@H]2C[C@@H](/C=C\C(=C/C[C@@H](/C=C\C(=C/C([C@@](C1=O)(C(=O)O2)C)NC(=O)[C@@H](C)O)\C)O)\C)OC(=O)C	Active	Non-active	Active	Active	Non-active	Active
6438458	CC[C@@H]1[C@H](/C=C(/C=C/C(=O)[C@@H](C[C@@H]([C@@H]([C@H]([C@@H](CC(=O)O1)O)C)O[C@H]2[C@@H]([C@H]([C@H]([C@H](O2)C)O[C@H]3C[C@@]([C@H]([C@@H](O3)C)O)(C)O)N(C)C)O)CC=O)C)\C)CO	Active	Non-active	Active	Active	Non-active	Active
6436173	C[C@H]1/C=C/C=C(\C(=O)NC2=C(C3=C(C4=C(C(=C3O)C)O[C@@](C4=O)(O/C=C/[C@@H]([C@H]([C@H]([C@@H]([C@@H]([C@@H]([C@H]1O)C)O)C)OC(=O)C)C)OC)C)C5=C2N6C=CC(=CC6=N5)C)O)/C	Active	Non-active	Active	Active	Non-active	Active
5489126	C[C@@H]1[C@H]([C@@H]([C@H]([C@H](O1)NC2=NC3=C(C(=CN3)C#N)C(=N2)OC)O)O)O[C@H]4[C@@H]([C@H]([C@@H]([C@H](O4)CO)OC)O)O	Active	Non-active	Active	Active	Non-active	Non-active
3070885	CC(C)CC(C(=O)N/C(=C(\C)/COC(=O)N)/C(=O)NC(CO)C(=O)O)NC(=O)C1CCC=NN1C(=O)C(C(C)N)NC(=O)CC(CCN=C(N)N)N	Active	Non-active	Active	Active	Non-active	Active
3063130	CC1C(C(C(O1)OC2C(C(C(C(C2O)O)N=C(N)N)O)N=C(N)N)O)(C)O	Active	Non-active	Active	Active	Non-active	Active
3041557	C1C(OC(C(C1O)N)OC2C(CC(C(C2O)O)N)N)CN	Active	Non-active	Active	Active	Non-active	Active
3040841	C1[C@H]([C@@H]([C@H]([C@@H]([C@H]1N)O[C@@H]2[C@@H]([C@H]([C@@H]([C@H](O2)CO)O)O)O)O)O[C@@H]3[C@@H]([C@H]([C@@H]([C@H](O3)CN)O)O)O)N	Active	Non-active	Active	Active	Non-active	Active
40073	C1C(=C(N2[C@H](S1)[C@@H](C2=O)NC(=O)C(C3=CC=C(C=C3)O)N)C(=O)O)CSC4=NNN=C4	Active	Non-active	Active	Active	Non-active	Active
233768	CC1CC(CC(C1=O)C(CC2CC(=O)NC(=O)C2)O)(C)OC(=O)C	Active	Non-active	Active	Active	Non-active	Active
197124	CC1C(=O)N(C2CSC(C(C(=O)N(C(C(=O)OCC(C(=O)N1)NC(=O)C3=NC4=CC=CC=C4N=C3)C(C)C(C)C)C)N(C(=O)C(NC(=O)C(COC(=O)C(N(C2=O)C)C(C)C(C)C)NC(=O)C5=NC6=CC=CC=C6N=C5)C)C)SC)C	Active	Non-active	Active	Active	Non-active	Active
196990	CC[C@]1(C[C@@H](C2=C([C@H]1C(=O)OC)C=C3C(=C2O)C(=O)C4=C(C=CC(=C4C3=O)O)O)O[C@H]5C[C@@H]([C@@H]([C@@H](O5)C)O)N(C)C)O	Active	Non-active	Active	Active	Non-active	Active
170580	CC(=O)OCC1=C(N2[C@@H]([C@@](C2=O)(NC(=O)CCC[C@H](C(=O)O)N)OC)SC1)C(=O)O	Active	Non-active	Active	Non-active	Non-active	Non-active
168002	C1=C2C(=C(C(=O)N2)NC=O)SS1	Active	Non-active	Active	Active	Non-active	Non-active
156954	CC1C(C(CC(O1)OC2CC(CC3=C(C4=C(C(=C23)O)C(=O)C5=C(C4=O)C=CC=C5O)O)(C(C)O)O)N)OC(CC(C)O)OC(C)CO	Active	Non-active	Active	Active	Non-active	Active
156086	CNC[C@@H]1CC[C@H]([C@H](O1)O[C@@H]2[C@H](C[C@@H]([C@H]([C@H]2O)N(C)C(=O)CN)OC)N)N	Active	Non-active	Active	Active	Non-active	Active
152692	CC1C(C(C(C(O1)OC(C(C2=CSC(=N2)C3=CSC(=N3)C(=O)NCCCNCCCCN)O)NC(=O)C(C(C)O)NC(=O)CC(C(C)NC(=O)C(C(C4=CN=CN4)OC5C(C(C(C(O5)CO)O)O)OC6C(C(C(C(O6)CO)O)OC(=O)N)O)NC(=O)C7=C(C(=NC(=N7)C(CC(=O)N)NCC(C(=O)N)N)N)C)O)O)O)N	Active	Active	Active	Active	Non-active	Active
152688	CC[C@]1(C[C@@H](C2=C([C@H]1C(=O)OC)C=C3C(=C2O)C(=O)C4=C(C3=O)C=CC=C4O)O[C@H]5C[C@@H]([C@@H]([C@@H](O5)C)O[C@H]6C[C@@H]([C@@H]([C@@H](O6)C)O[C@H]7CCC(=O)[C@H](O7)C)O)N(C)C)O	Active	Non-active	Active	Active	Non-active	Active
151592	CC(C)C(C(=O)NC(C1CC(C2N1C2)N=C(N)N)C(=O)O)N	Active	Non-active	Active	Active	Non-active	Active
151569	COC1=C(C=C2C(=C1)C(=O)N3[C@@H](CC[C@@H]3O)C=N2)O	Active	Non-active	Active	Active	Non-active	Active
149755	CC[C@]1(C[C@@H](C2=C([C@H]1C(=O)OC)C=C3C(=C2O)C(=O)C4=C(C3=O)C=CC=C4O)O[C@H]5C[C@@H]([C@@H]([C@@H](O5)C)O)N(C)C)O	Active	Non-active	Active	Active	Active	Non-active
133780	C1=C(C=C(C(=C1Cl)O)C(=O)C2=C(C(=C(N2)Cl)Cl)Cl)Cl	Active	Non-active	Active	Active	Active	Non-active
127568	C[C@@H]1[C@H](C(=O)[C@]2([C@H]([C@]1(C)C[C@H]([C@@]3(CO3)C(=O)C=O)O)CCC=C2C)C)O	Active	Non-active	Active	Active	Non-active	Active
125665	C1=CC(OC(C1NC(=O)C(CO)N)C(CC(CN=C(N)N)O)(C(=O)O)O)N2C=C(C(=NC2=O)N)CO	Active	Non-active	Active	Active	Non-active	Active
107861	CC[C@]1(C[C@@H](C2=C([C@H]1C(=O)OC)C=C3C(=C2O)C(=O)C4=C(C=CC(=C4C3=O)O)O)O[C@H]5C[C@@H]([C@@H]([C@@H](O5)C)O[C@H]6C[C@@H]([C@@H]([C@@H](O6)C)O[C@H]7C[C@@H]([C@@H]([C@@H](O7)C)O)O)O)N(C)C)O	Active	Non-active	Active	Active	Non-active	Active
99345	CC[C@]1(C[C@@H](C2=C([C@H]1C(=O)OC)C=C3C(=C2O)C(=O)C4=C(C=CC(=C4C3=O)O)O)O[C@H]5C[C@@H]([C@@H](C(O5)C)O[C@H]6C[C@@H]([C@@H]([C@@H](O6)C)O)O)N(C)C)O	Active	Active	Active	Active	Non-active	Active
72173	C[C@H]1[C@H]([C@H]([C@H]([C@@H](O1)OC(C(C2=NC(=CS2)C3=NC(=CS3)C(=O)NCCCC(CC(=O)NCCCNCCCCN)N)O)NC(=O)C(C(C)O)NC(=O)CC(C(C)NC(=O)C(C(C4=CN=CN4)O[C@@H]5[C@H]([C@H]([C@@H]([C@@H](O5)CO)O)O)O[C@@H]6[C@H]([C@H]([C@@H]([C@H](O6)CO)O)OC(=O)N)O)NC(=O)C7=C(C(=NC(=N7)C(CC(=O)N)NCC(C(=O)N)N)N)C)O)O)O)N	Active	Non-active	Active	Active	Non-active	Active
54697251	C/C/1=C\C=C\C=C\C=C/CC(NC(=O)/C=C/C=C/C=C/C=C/C2(C(C(C(=C2C(=O)O1)O)OC)O)C)C3=CC=CC=C3	Active	Non-active	Active	Active	Non-active	Active
6445466	CCCC(=O)OC1C(OC(CC1(C)O)OC2C(OC(C(C2N(C)C)O)OC3C(CC(C(=O)/C=C\C=C\CC(OC(=O)CC(C3OC)OC(=O)CC)C)C)CC=O)C)C	Active	Non-active	Active	Active	Non-active	Active
6445429	CCCC(=O)OC1C(OC(CC1(C)O)OC2C(OC(C(C2N(C)C)O)OC3C(CC(C(/C=C/C=C/CC(OC(=O)CC(C3OC)OC(=O)CC)C)O)C)CC=O)C)C	Active	Non-active	Active	Active	Non-active	Active
5368895	C1CC(=NC1)/C=C/C(=O)N	Active	Non-active	Active	Active	Non-active	Active
3068367	CN[C@H]1C[C@H]([C@@H]([C@H]([C@@H]1O)O[C@H]2[C@@H]3[C@H]([C@@H]([C@H](O2)CO)O)OC4(O3)[C@@H]([C@H]([C@H]([C@H](O4)[C@H](CO)N)O)O)O)O)N	Active	Non-active	Active	Active	Non-active	Active
43588	CC(C(C(=O)O)N(C)C(=O)C(CC1=CN=CN1)N)NC(CC2=CN=CN2)C(=O)O	Active	Non-active	Active	Active	Non-active	Active
40587	CC1[C@@]2(C(C[C@@H](O1)CC(=O)O)C(=O)C3=C(C2=O)C(=CC=C3)O)O	Active	Non-active	Active	Non-active	Non-active	Non-active
24995	C([C@@H](C(=O)O)N)C(Cl)Cl	Active	Non-active	Active	Active	Non-active	Active
3084089	C[C@H]1[C@@H]([C@H]([C@H]([C@H](O1)OC2CC3C(C(CC(O3)(CC(CC(CC(CC(CC(=O)CC(CC(=O)OC(C(C=CC=CC=CC=CC=CC=CC=C2)C)C(C)CCC(CC(=O)C4=CC=C(C=C4)N)O)O)O)O)O)O)O)O)C(=O)O)O)N)O	Active	Non-active	Active	Active	Non-active	Active
198523	CC1=CC(=O)C2=C(C3=C(C=CC=C3O)C(=C2C1C(=O)C)C4=C5C(C(CC(=O)C5=C(C6=C4C=CC=C6O)O)(C)O)C(=O)C)O	Active	Non-active	Active	Active	Non-active	Active
194393	CC(C1CCC(C(O1)OC2C(CC(C(C2O)NC)OC)N)N)N	Active	Non-active	Active	Active	Non-active	Active
161315	CC(=O)OC1C=COC=C2C1N3C(=O)C45CC6=COC=CC(C6N4C(=O)C3(C2)SS5)OC(=O)C	Active	Non-active	Active	Active	Non-active	Active
83845	C[C@H]1[C@H]([C@H](C[C@@H](O1)O[C@H]2C[C@@](CC3=C(C4=C(C(=C23)O)C(=O)C5=C(C4=O)C=CC=C5OC)O)(C(C)O)O)N)O	Active	Non-active	Active	Active	Non-active	Active
16132365	C1C2C(=O)NC(C3=CC(=CC(=C3)O)OC4=C(C=CC(=C4)C(C(=O)N2)N)O)C(=O)NC5C6=CC(=C(C(=C6)OC7=C(C=C(C=C7)C(C8C(=O)NC(C9=CC(=CC(=C9C2=CC(=CC(=C2O)Cl)C(C(=O)N8)NC5=O)O)O)C(=O)O)O)Cl)O)OC2=C(C=C1C=C2)Cl	Active	Non-active	Active	Non-active	Non-active	Non-active
5141362	ON(CCCP(O)(O)=O)C=O	Active	Non-active	Active	Active	Non-active	Active
6445946	CC1C(/C=C(\C=C/C(C/C=C(\C=C/C(C/C=C(\C1=O)/C)OC(=O)C)/C)O)/C)NC(=O)C(C)O	Active	Non-active	Active	Active	Active	Non-active
6440871	C[C@@H]1[C@H]2C[C@@H](/C=C/C(=C/C[C@@H](/C=C/C(=C/[C@H]([C@@](C1=O)(C(=O)O2)C)NC(=O)C(=O)C)/C)O)/C)O	Active	Non-active	Active	Active	Non-active	Active
6434523	CC1CCCCCCCCCC(C(=O)/C=C\C(=O)O1)OC(=O)CCC(=O)O	Active	Non-active	Active	Active	Non-active	Active
6335620	CC1([C@@H](N2[C@H](S1)[C@@H](C2=O)NC(=O)[C@@H](C3=CC=CC=C3)NC(=O)N4CCN(C4=O)S(=O)(=O)C)C(=O)O)C	Active	Non-active	Active	Active	Active	Active
3060518	CC1(CC1)[C@@H](C(=O)O)N	Active	Non-active	Active	Active	Non-active	Active
3056185	CNC1C(C(C(C(C1OC)O)N)OC2C(CCC(O2)CN)N)O	Active	Non-active	Active	Active	Non-active	Active
3052480	C1C(C(C(C(C1NCC(CCN)O)OC2C(C(C(C(O2)CO)O)N)O)O)OC3C(C(C(C(O3)CN)O)O)O)N	Active	Non-active	Active	Active	Non-active	Active
3049909	C1[C@@H](C(=O)N1[C@H](C2=CC=C(C=C2)O)C(=O)O)NC(=O)C(C3=CC=C(C=C3)O)N	Active	Non-active	Active	Active	Non-active	Active
3042313	C1C(C(=O)N1C(C2=CC=C(C=C2)O)C(=O)O)NC(=O)C(C3=CC=C(C=C3)OCCC(C(=O)O)N)N	Active	Non-active	Active	Active	Non-active	Active
3037920	C[C@H]1C[C@H](C[C@H]([C@@H]1OC(=O)C2=C(C(=C(C(=C2OC)Cl)O)Cl)C)O)O[C@@H]3[C@H](O[C@]4(C[C@H]3O)O[C@@H]5[C@H](O[C@H]([C@H]([C@]5(O4)C)O)O[C@@H]6[C@H]([C@@H](O[C@@H]([C@@H]6OC)O)O[C@@H]7[C@H](O[C@H]([C@H]([C@H]7O)OC)O[C@H]8[C@@H]([C@H]9[C@H](CO8)O[C@@]1(O9)[C@H]2[C@H]([C@@]([C@H](O1)C)(C(=O)C)O)OCO2)OC(=O)C(C)C)COC)O)C)C	Active	Non-active	Active	Active	Non-active	Non-active
38455	CN1C(=O)C2(N(C(=O)C1(SS2)CC3=CC=CC=C3)C)CO	Active	Non-active	Active	Active	Non-active	Non-active
174107	CC1C(C(C(C(O1)OC2C(OC(C(C2O)O)OC3C(OC(C(C3O)O)OC(C(CO)O)C(C(C=O)O)O)CO)CO)O)O)NC4C(C(C(C(C4O)O)O)CO)O	Active	Non-active	Active	Active	Non-active	Active
198328	C1C(C(C(C(C1NC(=O)C(CCN)O)O)OC2C(C(C(O2)CO)O)O)OC3C(C(C(C(O3)CO)O)O)N)N	Active	Non-active	Active	Active	Non-active	Non-active
6446340	CC1/C=C\C=C/C=C/C=C/C=C/C=C/C=C/C(CC2C(C(CC(O2)(CC(CC(CC(CC(CC(CC(CC(=O)OC1C(C)CCC(CC(=O)C3=CC=C(C=C3)NC)O)O)O)O)O)O)O)O)O)C(=O)O)OC4C(C(C(C(O4)C)O)N)O	Active	Non-active	Active	Active	Non-active	Active
30778	CCC(C)C(C(=O)NC(CCC1C=CC(C=C1)N)C(=O)O)NC	Active	Non-active	Active	Active	Non-active	Active
23662401	CC(=O)OCC1=C(N2C(SC1)C(NC(=O)CSC1=CC=NC=C1)C2=O)C(O)=O	Active	Non-active	Active	Active	Non-active	Active
456857	CCCCCCCCCCCCCC(=O)NC1CC(C(NC(=O)C2C(C(CN2C(=O)C(NC(=O)C(NC(=O)C3CC(CN3C(=O)C(NC1=O)C(C)O)O)C(C(C4=CC=C(C=C4)O)O)O)C(CC(=O)N)O)C)O)O)O	Active	Non-active	Active	Active	Non-active	Active
301125	CC[C@H]1[C@](CC[C@@H](O1)[C@@H]2CC[C@@](O2)([C@@]3(CC[C@H](O3)[C@@H](C)[C@]4(CC[C@@H]([C@H](O4)C[C@@]5([C@H](CC[C@@H](O5)[C@@H](C)[C@@H](C[C@H]6CC[C@@H]([C@H](O6)[C@@H](C)C(=O)O)C)O)C)O)C)O)C)O)(C)O	Active	Non-active	Active	Active	Non-active	Active
197125	CNC1CC(C(C(C1O)OC2C3C(C(C(O2)CO)O)OC4(O3)C(C(C(C(O4)C(CO)N)O)O)O)O)NC	Active	Non-active	Active	Non-active	Non-active	Non-active
173208	CC(C)C[C@@H](C(=O)NN(C)P(=O)(O)OC)N	Active	Non-active	Active	Non-active	Active	Non-active
163530	C[C@H]([C@@H](C(=O)N[C@@H](CCCN(C(=O)C)O)C(=O)O)NC(=O)C1=C(C(=CC=C1)O)O)O	Active	Non-active	Active	Active	Non-active	Active
107865	C[C@H]1[C@H]([C@H](C[C@@H](O1)OC2C[C@@](CC3=C(C4=C(C(=C23)O)C(=O)C5=CC=CC=C5C4=O)O)([C@H](C)O)O)N)O	Active	Non-active	Active	Active	Non-active	Active
16130216	C[C@@H]1C2C(=O)N[C@@H](CCCCNC[C@H]3C(=O)N[C@H](C(=O)NCC(=O)N4CCC[C@H]4C(=O)N[C@H](C(=O)N[C@H]5C(SC[C@@H](C(=O)N3)NC(=O)[C@H](CSC[C@@H](C(=O)N[C@H](C(=O)NCC(=O)N[C@H](C(=O)N2)CC(=O)N)[C@H](C(=O)O)O)NC(=O)[C@@H](NC(=O)[C@@H](NC5=O)CC6=CC=CC=C6)C(C)C)NC(=O)[C@@H](NC(=O)[C@@H](NC(=O)[C@H](CS1)N)CCCNC(=N)N)CCC(=O)N)C)CC7=CC=CC=C7)CC8=CC=CC=C8)C(=O)O	Active	Non-active	Active	Active	Non-active	Active
6445465	CCC(=O)O[C@@H]1CC(=O)O[C@@H](C/C=C/C=C/C(=O)[C@@H](C[C@@H]([C@@H]([C@H]1OC)O[C@H]2[C@@H]([C@H]([C@@H]([C@H](O2)C)O[C@H]3C[C@@]([C@H]([C@@H](O3)C)OC(=O)CC)(C)O)N(C)C)O)CC=O)C)C	Active	Non-active	Active	Active	Active	Non-active
6441138	C/C=C(\C(=O)NC(CO)C(=O)O)/NC(=O)C1CCCN1C(=O)C2CCCCN2C(=O)C(C(C)N)NC(=O)C(C(C)CCN=C(N)N)N	Active	Non-active	Active	Active	Non-active	Active
6440067	C[C@@H]1C[C@H]1/C=C/[C@@H]2C[C@H]2C3C[C@H]3C4C[C@H]4C5C[C@H]5/C=C/C=C/C(=O)NC[C@@H]6[C@H]([C@H]([C@@H](O6)N7CCC(=O)NC7=O)O)O	Active	Non-active	Active	Active	Non-active	Non-active
5492644	C[C@H]1CC[C@H]([C@@H]2CC[C@H]([C@@]3([C@H]1C=C([C@H]([C@H]23)O)CO)O)C)C(C)C	Active	Non-active	Active	Active	Non-active	Active
5477086	CC1C2CC(C(/C=C/C=C(/CC3=CC(=C(C(=C3)OC)Cl)N(C(=O)CC(C4(C1O4)C)OC(=O)C(C)C)C)\C)OC)(NC(=O)O2)O	Active	Non-active	Active	Active	Non-active	Active
6447311	CC[C@@H]1[C@H](/C=C/C=C/C(=O)[C@@H](C[C@@H]([C@@H]([C@H](/C=C/C(=O)O1)C)O[C@H]2[C@@H]([C@H](C[C@H](O2)C)N(C)C)O)C)C)CO[C@H]3[C@@H]([C@@H]([C@@H]([C@H](O3)C)O)OC)OC	Active	Non-active	Active	Active	Non-active	Active
9568617	C[C@H]1[C@H](NC(=O)C(=N/OC(C)(C)C(=O)O)\C2=CSC(N)=N2)C(=O)N1S(=O)(=O)O	Active	Non-active	Active	Active	Non-active	Active
6447312	CCC1C(/C=C\C=C\C(=O)C(CC(C(C(/C=C/C(=O)O1)C)OC2C(C(CC(O2)C)N(C)C)O)C)C)(COC3C(C(C(C(O3)C)O)OC)OC)O	Active	Non-active	Active	Active	Non-active	Non-active
3086482	CC1([C@H](CCC(=C)[C@H]1O[C@]23C(=C[C@H](C(O2)(C)C)Cl)C(=O)C4=C(C=C(C=C4C3=O)O)O)Cl)C	Active	Non-active	Active	Active	Non-active	Active
122781	C[C@H]1C[C@](C(=O)[C@@H]([C@H]([C@H]([C@H](OC(=O)[C@@H]([C@H]([C@@H]([C@H]1OC2C(C(CC(O2)C)OC)O)C)OC3CC(C(C(O3)C)OC(=O)C)(C)OC)C)C(C)C(C)O)C)OC(=O)C)C)(C)O	Active	Non-active	Active	Active	Non-active	Active
23692439	CC(C)[C@H]1[C@@H]2CC(=C(N2C1=O)C(=O)[O-])SCCNC(=O)C	Active	Non-active	Active	Active	Non-active	Active
6446789	CCCC(=O)O[C@H]1CC(=O)N(C2=C(C(=CC(=C2)C/C(=C/C=C/[C@H]([C@]3(C[C@@H]([C@H]([C@H]4[C@]1(O4)C)C)OC(=O)N3)O)OC)/C)OC)Cl)C	Active	Non-active	Active	Active	Non-active	Active
6441950	CC[C@@H]1[C@H](/C=C(/C=C/C(=O)[C@@H](C[C@@H]([C@@H]([C@H]([C@@H](CC(=O)O1)O)C)O[C@H]2[C@@H]([C@H](C[C@H](O2)C)N(C)C)O)CC=O)C)\C)CO	Active	Non-active	Active	Active	Non-active	Non-active
358063	C1=CC=C2C(=C1)N3C4=CC=CC(=C4N2N5C6=CC=CC=C6N3C7=CC=CC(=C75)C(=O)O)C(=O)O	Active	Non-active	Active	Active	Non-active	Active
197287	CCC(C)C(C(=O)NC1C(OC(=O)C2CCCNN2C(=O)C(NC(=O)C3CCCNN3C(=O)C(NC(=O)C(NC1=O)CC(C)C)C(C)C)CC(C)C)C)NC=O	Active	Non-active	Active	Active	Non-active	Active
16132310	CC[C@H](C)[C@@H](C(=O)N[C@H](CCC(=O)O)C(=O)N[C@H](CC)C(=O)N[C@H](C)C(=O)N[C@@H](C(C)C)C(=O)N[C@H](CC1=CNC2=CC=CC=C21)C(=O)NCC(=O)N[C@H](CO)C(=O)N[C@H](C)C(=O)NCC(=O)N[C@H](CC)C(=O)N[C@@H](C(C)C)C(=O)N[C@@H]([C@@H](C)CC)C(=O)N[C@H](C)C(=O)N[C@@H](C)C(=O)N[C@H](C)C(=O)O)NC(=O)[C@@H](CC)NC(=O)[C@H](CC(C)C)NC(=O)[C@@H](C)N	Active	Non-active	Active	Active	Non-active	Active
6447530	CC1C2CC(C(/C=C/C=C(/CC3=CC(=C(C(=C3)OC)Cl)NC(=O)CC(C4(C1O4)C)O)\C)OC)(NC(=O)O2)O	Active	Non-active	Active	Active	Active	Non-active
3056007	CC(C1CCC(C(O1)OC2C(C(C(C(C2O)N(C)C(=O)CN=CN)OC)O)N)N)N	Active	Non-active	Active	Active	Active	Active
5486849	COC1=CC(=C2C(=C1)C=C(OC2=O)CO)O	Active	Non-active	Active	Active	Non-active	Active
54676857	CCC(C)/C=C/C=C/C(=O)OC1CCC2(C(CCC3(C2CC(C(=C)C3CC4=C(C(=C(OC4=O)C)C)O)O)C)OC1(C)C)C	Active	Non-active	Active	Active	Non-active	Active
23692437	CC1CC(C(OC1C2CC(C(O2)C3(CCC(O3)C4(CCC5(O4)CC(C(C(O5)C(C)C(C(C)C(=O)[O-])OC)C)O)C)C)C)(COC(=O)NCCC6=CC=CC=C6)O)C	Active	Non-active	Active	Active	Non-active	Active
5358591	C1=CC=C2C(=C1)C3=CC(=NC(=C3N2)C(CO)O)CO	Active	Non-active	Active	Active	Non-active	Active
3067937	C[C@@H]([C@@H]1[C@H]2CC(=C(N2C1=O)C(=O)O)SCCNC(=O)CCNC(=O)[C@@H](C(C)(C)CO)O)O	Active	Non-active	Active	Active	Non-active	Active
6438439	C/C=C/C(=C/C(C)C(=O)CC1CC(CC(=O)O1)CC(=O)N)/C	Active	Non-active	Active	Active	Non-active	Active
54692893	CC(C(=O)N[C@H]1[C@H]2[C@@H]([C@H](CC(=C2C(=O)O[C@]1(C)C(Cl)Cl)O)O)O)N	Active	Non-active	Active	Active	Non-active	Active
6440092	CC[C@H]([C@@H]1CC[C@@H](O1)[C@@]2(C[C@H]([C@@H](O2)C/C=C(\C)/[C@@H]3[C@H](CC[C@@H](O3)/C(=C/[C@H]4C[C@H]([C@H]([C@H]([C@@H]4[C@@H](C(=O)C5C(=O)C(=C)OC5=O)OC)CO)O)C)/CO)C)C)C)O	Active	Non-active	Active	Active	Non-active	Active
3072006	CC1=CC(=C(C2=C1OC3=C(C2=O)C=C(N3[C@@H]4C=C([C@H]([C@@H]([C@H]4O)O)OC)CO)Cl)O)Cl	Active	Non-active	Active	Active	Non-active	Active
73213	C[C@H]1[C@H](CC[C@@H](O1)O[C@@H]2[C@H](O[C@H](C[C@H]2O)C3=C(C4=C(C=C3)C(=O)C5=C(C4=O)C=C[C@]6([C@@]5(C(=O)C[C@](C6)(C)O[C@H]7CC[C@@H]([C@@H](O7)C)O[C@H]8C=CC(=O)[C@@H](O8)C)O)O)O)C)O[C@H]9C=CC(=O)[C@@H](O9)C	Active	Non-active	Active	Active	Non-active	Active
73396	C[C@H]1C[C@@](C[C@H](C1=O)[C@@H](CC2CC(=O)NC(=O)C2)O)(C)OC(=O)C	Active	Non-active	Active	Active	Non-active	Active
6437060	CC1CCOC(=O)/C=C/C=C/C(=O)OC2CC3C4(C2(C5(CCC(=CC5O3)C)COC(=O)C1O)C)CO4	Active	Non-active	Active	Active	Non-active	Active
54708737	CC[C@H](C(=O)NC/C=C/C=C(\C)/[C@H]([C@@H](C)[C@H]1C(C([C@H](O1)/C=C/C=C/C=C(\C)/C(=C\2/C(=O)C=CN(C2=O)C)/O)O)O)OC)C3(C(C(C(C(O3)/C=C/C=C\C)(C)C)O)O)O	Active	Non-active	Active	Active	Non-active	Active
9344	C[C@@H]1CC2=C(C=C(C(=C2C(=O)O1)O)C(=O)NC(CC3=CC=CC=C3)C(=O)O)Cl	Active	Non-active	Active	Active	Non-active	Active
4580	CC1CC2=C(C=C(C(=C2C(=O)O1)O)C(=O)NC(CC3=CC=CC=C3)C(=O)O)Cl	Active	Non-active	Active	Active	Non-active	Active
5487783	CCCCCCCCN1C2=CC=CC=C2/C(=C\3/C(=O)C4=CC=CC=C4N3)/C1=O	Active	Non-active	Active	Active	Active	Non-active
5487616	CCN1C2=CC=CC=C2/C(=C\3/C(=O)C4=CC=CC=C4N3)/C1=O	Active	Non-active	Active	Active	Non-active	Active
30699	CC(=O)OCC1=C(N2[C@@H]([C@@H](C2=O)NC(=O)CSC3=CC=NC=C3)SC1)C(=O)O	Active	Non-active	Active	Active	Non-active	Active
6446452	CC1C(C(C(C(O1)OC2=CC=C(C=C2)/C=C/C(=O)NCCCNCCCCN)N=C(N)N)O)NC(=O)NC3C(C(C(CO3)OC4C(C5C(CO4)OC(=O)N5)NC(=O)N)O)NC(=O)N	Active	Non-active	Active	Active	Non-active	Active
3032396	CC1=CC=CC2=C(C=C(C=C12)OC)C(=O)O[C@H](C(=O)N/C(=C/3\[C@H]([C@@H]([C@H]4N3C4)O)OC(=O)C)/C(=O)N/C(=C/O)/C(=O)C)[C@@]5(CO5)C	Active	Non-active	Active	Active	Non-active	Active
149080	CC1CC12C(=O)OCC(C(=O)NC(C(=O)N(C3C(SCC(C(=O)N2C)N(C(=O)C(NC(=O)C(COC(=O)C4(CC4C)N(C3=O)C)NC(=O)C5=NC6=CC=CC=C6C=C5O)C)C)SC(C)C)C)C)NC(=O)C7=NC8=CC=CC=C8C=C7O	Active	Non-active	Active	Active	Active	Non-active
146804	CC1=CC(=C2C(=C1)CCC3=C(C4=C(C=C32)C(=O)C5=CC(=CC(=C5C4=O)O)O)O)O	Active	Non-active	Active	Active	Non-active	Active
146803	CC1=C(C(=C2C(=C1)CCC3=C(C4=C(C=C32)C(=O)C5=CC(=CC(=C5C4=O)O)O)O)O)C(=O)O	Active	Non-active	Active	Active	Non-active	Non-active
132767	CCCC1=CNN2C1=CC3=CC=CC=C3C2=O	Active	Non-active	Active	Active	Non-active	Active
6434610	C[C@@H]1/C=C/C=C(\C(=O)NC\2=C(C3=C(C(=C4C(=C3C(=O)/C2=C/NN5CCN(CC5)C6CCCC6)C(=O)[C@](O4)(O/C=C/[C@@H]([C@@H]([C@H]([C@@H]([C@@H]([C@@H]([C@@H]1O)C)O)C)OC(=O)C)C)OC)C)C)O)O)/C	Active	Non-active	Active	Active	Non-active	Active
54676855	CC1C2C(=O)CC3(C(O2)(C(C(O3)C)C(=O)OC)OC1C(C)/C=C(\C)/C=C/C(=C/4\C(=O)CN(C4=O)C)/O)C	Active	Non-active	Active	Active	Non-active	Active
6450510	C/C=C(\C(=O)O[C@@H]1[C@H](OC([C@@H]([C@@H]1O[C@H]2C[C@@H]([C@]([C@@H](O2)C)(C(C)OC(=O)C(C)C)O)OC)O)C3(CC(=O)C(=C(C3=O)C(=O)O)N)O)COC(=O)C)/NC(=S)SCC(C(=O)O)NC(=O)C	Active	Non-active	Active	Active	Non-active	Active
24846609	CO/C(=C\C1=CC=C(C=C1)O)/C(=O)OCC2=C(N3[C@@H]([C@@](C3=O)(NC(=O)CCC[C@H](C(=O)O)N)OC)SC2)C(=O)O	Active	Non-active	Active	Active	Non-active	Active
6450511	CCC(C)C(=O)OC(C)[C@]1([C@@H](O[C@H](C[C@@H]1OC)O[C@@H]2[C@@H]([C@H](OC([C@@H]2O)C3(CC(=O)C(=C(C3=O)C(=O)O)N)O)COC(=O)C)OC(=O)/C(=C\C)/NC(=S)SCC(C(=O)O)NC(=O)C)C)O	Active	Non-active	Active	Active	Non-active	Active
412232	CC1C(C(CC(O1)OC2C(CC3=C(C2=O)C(=C4C(=C3)C=C(C=C4O)OC5CC(C(C(O5)C)OC6CC(C(C(O6)C)OC)O)OC(=O)C)O)C(C(=O)C(C(C)O)O)OC)OC7CC(C(C(O7)C)O)OC8CC(C(C(O8)C)OC(=O)C(C)C)(C)O)O	Active	Non-active	Active	Active	Non-active	Active
130684	C1[C@H](C(=N[C@@H]1C(=O)NC2=CNC(=C2)C(=O)N=CC=C(N)N)N)O	Active	Non-active	Active	Active	Non-active	Active
134990	CC([C@@H]1[C@H]2C[C@@H]([C@@H](N2C1=O)C(=O)O)SCCNC(=O)CCNC(=O)[C@H](C(C)(C)CO)O)O	Active	Non-active	Active	Active	Non-active	Active
9577432	CC1=NC2=NC(=NN2C(SCC2=C(N3[C@H](SC2)[C@H](NC(=O)C(=N\O[C@H](C(O)=O)C2=CC(O)=C(O)C=C2)\C2=CN=C(N)S2)C3=O)C(O)=O)=C1)C(O)=O	Active	Non-active	Active	Active	Non-active	Active
71201	C1[C@@H]([C@H]([C@@H](C([C@@H]1N)O[C@@H]2[C@@H]([C@H]([C@@H]([C@H](O2)CO)O)N)O)O)O[C@@H]3[C@@H]([C@H]([C@@H]([C@H](O3)CN)O)O)N)N	Active	Non-active	Active	Active	Non-active	Active
6444087	CC1CCC(OC12C(CC(O2)C3C(CC(C(O3)(CO)O)C)C)C)C4(CCC5(O4)CC(C(C(O5)C(C)/C=C(\C)/C(=O)C(C)CC(C)C(=O)O)C)O)C	Active	Non-active	Active	Active	Non-active	Active
54747044	C[C@H]1C[C@@H]([C@@H]([C@@H]2[C@@H]1[C@]\3([C@@H](C=C2)/C(=C\C[C@@H](/C(=C/[C@@H]4[C@H](C=C(C[C@@]45C(=O)/C(=C3\O)/C(=O)O5)C=O)O)/C)O)/C)C)O)C	Active	Non-active	Active	Active	Non-active	Active
54721458	CC1CC(C(C2C1C/3(C(C=C2)/C(=C\CC(/C(=C\C4C(C=C(CC45C(=O)/C(=C3/O)/C(=O)O5)C=O)O)/C)O)/C)C)O)C	Active	Non-active	Active	Active	Non-active	Active
168966	CC1=CC2=C(C(=C1)O)C(=O)C3(O2)C(=CC(=O)C=C3OC)C(=O)OC	Active	Non-active	Active	Active	Non-active	Active
6444169	CCC1C(C2C(O2)(/C=C/C(=O)C(CC(C(C(C(CC(=O)O1)O)C)OC3C(C(CC(O3)C)N(C)C)O)CC(=O)O)C)C)C	Active	Non-active	Active	Active	Non-active	Active
72520	CC[C@H]1C[C@H]2CC[C@H](O2)[C@@H](C(=O)O[C@@H](C[C@@H]3CC[C@@H](O3)[C@@H](C(=O)O[C@H](C[C@H]4CC[C@H](O4)[C@@H](C(=O)O[C@@H](C[C@@H]5CC[C@@H](O5)[C@@H](C(=O)O1)C)C)C)CC)C)C)C	Active	Non-active	Active	Active	Non-active	Active
54715134	C[C@H]1[C@@H]2C=C[C@]3(CO3)[C@@](O2)(O[C@H]1[C@H](C)/C=C(\C)/C=C/C(=C\4/C(=O)[C@@H](N(C4=O)[C@@H]5CC[C@@H]([C@@H](O5)C)O)[C@H](C)C(=O)NC)/O)C	Active	Non-active	Active	Active	Non-active	Active
9915017	C[C@@H]1CCO[C@H](/C=C/C=C\C(=O)O[C@@H]2C[C@@H]3[C@]4([C@]2([C@]5(CCC(=C[C@H]5O3)C)COC(=O)[C@H]1O)C)CO4)[C@@H](C)O	Active	Non-active	Active	Non-active	Active	Non-active
6436272	C(CO/C=C/[C@@H](C(=O)O)N)N	Active	Non-active	Active	Active	Non-active	Active
5458447	C(CO/C=C/C(C(=O)O)N)N	Active	Non-active	Active	Active	Non-active	Active
125279	CCC1(C(=O)C(=C(S1)O)C)C=C(C)C=C	Active	Non-active	Active	Active	Non-active	Active
9578317	C[C@@H]([C@H]1[C@H]2CC(=C(N2C1=O)C(=O)O)[S@](=O)/C=C/NC(=O)C)O	Active	Non-active	Active	Active	Active	Active
73618	C[C@H]1[C@H](CC[C@@H](O1)O[C@]23C(=O)C[C@@](C[C@]2(C=CC4=C3C(=O)C5=C(C4=O)C(=C(C=C5)[C@H]6C[C@H]([C@@H]([C@H](O6)C)O)O[C@H]7CC[C@@H]([C@@H](O7)C)O[C@H]8C[C@H]([C@@H]([C@H](O8)C)O)O)O)O)(C)O)O	Active	Non-active	Active	Active	Non-active	Active
54710544	CC[C@H](C(=O)NC/C=C/C=C(\C)/[C@H]([C@@H](C)C1[C@H]([C@@H](C(O1)/C=C/C=C/C=C(\C)/C(=C\2/C(=O)C=CN(C2=O)C)/O)O)O)OC)C3(C(C(C(C(O3)/C=C/C=C\C)(C)C)O)O)O	Active	Non-active	Active	Active	Non-active	Active
25199778	C[C@@H]1C/C=C\C=C\C=C\C=C\[C@@H](C[C@H]2[C@@H]([C@H](C[C@](O2)(C[C@H](C[C@@H]3[C@H](O3)/C=C\C(=O)O1)O)O)O)C(=O)O)OC4[C@H]([C@H]([C@@H]([C@H](O4)C)O)N)O	Active	Non-active	Active	Active	Active	Non-active
13456557	CC1C(C(CC(O1)OC2CC(C(=O)C3=C(C4=C5C(=C(C=C4C(=C23)OC)C)C6C7C(O5)(C(C(O6)(O7)C(OC)OC)(CO)O)OC8CC(C(C(O8)C)(C(=O)C)O)O)O)O)(C)O)OC(=O)C	Active	Non-active	Active	Active	Non-active	Active
3086133	C[C@H]1[C@H]([C@](C[C@@H](O1)OC2CC(C(=O)C3=C(C4=C5C(=C(C=C4C(=C23)OC)C)C6C7C(O5)(C(C(O6)(O7)C(OC)OC)(CO)O)O[C@H]8C[C@H]([C@]([C@@H](O8)C)(C(=O)C)O)O)O)O)(C)O)OC(=O)C	Active	Non-active	Active	Active	Active	Active
4065234	C1=NC2=C(C(=N1)N)N=CN2C3C(C(C(O3)CC(CCC(C(=O)O)N)N)O)O	Active	Non-active	Active	Active	Active	Active
308141	CC[C@]1(C[C@@H](C2=C([C@H]1C(=O)OC)C=C3C(=C2O)C(=O)C4=C(C3=O)C=CC=C4O)OC5CC(C(C(O5)C)OC6CC(C(C(O6)C)OC7CCC(=O)C(O7)C)O)N(C)C)O	Active	Non-active	Active	Active	Non-active	Active
24839927	CCC(=O)O[C@@H]1CC(=O)O[C@@H](C/C=C/C=C/[C@@H]([C@@H](C[C@H]([C@H]([C@H]1OC)O[C@@H]2[C@@H]([C@H](C([C@H](O2)C)O[C@H]3C[C@@]([C@H]([C@@H](O3)C)O)(C)O)N(C)C)O)CC=O)C)O)C	Active	Non-active	Active	Active	Non-active	Active
23693562	CC1CC(C(OC1C2CC(C(O2)C3(CCC(O3)C4(CCC5(O4)CC(C(C(O5)C(C)C6C(C(C(C(O6)(C(C)C(=O)[O-])O)C)OC)C)C)O)C)C)C)(C)O)C	Active	Non-active	Active	Active	Non-active	Active
6445458	CCC(=O)O[C@@H]1CC(=O)O[C@@H](C/C=C/C=C/[C@@H]([C@@H](C[C@@H]([C@@H]([C@H]1OC)O[C@H]2[C@@H]([C@H]([C@@H]([C@H](O2)C)O[C@H]3C[C@@]([C@H]([C@@H](O3)C)O)(C)O)N(C)C)O)CC=O)C)O)C	Active	Non-active	Active	Active	Non-active	Active
5458528	CC1C(C(CC(O1)OC2CC(OC(C2O)C)OC3=CC4=CC5=C(C(=O)[C@H]([C@@H](C5)[C@@H](C(=O)[C@H]([C@@H](C)O)O)OC)OC6CC(C(C(O6)C)O)OC7CC(C(C(O7)C)O)OC8CC(C(C(O8)C)OC)O)C(=C4C(=C3C)O)O)O)O	Active	Non-active	Active	Active	Non-active	Active
6450032	CCC1C(C2C(O2)(/C=C/C(=O)C(CC(C(C(C(CC(=O)O1)O)C)OC3C(C(C(C(O3)C)OC4CC(C(C(O4)C)O)(C)O)N(C)C)O)CC=O)C)C)C	Active	Non-active	Active	Active	Non-active	Non-active
6443875	CC/C(=C\C=C\[C@H]1C=C[C@@H]2CCC[C@H]2[C@@H]1C(=O)C3=CC=CN3)/[C@H]4[C@H](CC[C@@H](O4)[C@@H](C)C(=O)O)C	Active	Non-active	Active	Active	Active	Active
5384876	CC1C(C(C(C(O1)OC2C(OC(C(C2(C)O)O)C)OC3=CC=CC4=C3C5=C6C7=C(C=CC(=C7C(=O)O5)C)OC(=O)C6=C4O)N)OC)O	Active	Active	Active	Active	Non-active	Active
54724550	C[C@H]1[C@@H]2C(=O)C[C@]3([C@@](O2)([C@H]([C@H](O3)C)C(=O)OC)O[C@@H]1[C@H](C)/C=C(\C)/C=C/C(=C/4\C(=O)CN(C4=O)C)/O)C	Active	Non-active	Active	Active	Non-active	Active
16218858	CC([C@@H]1[C@H]([C@@H]([C@H]([C@H](O1)O[C@@H]2[C@H](C[C@H]([C@@H]([C@H]2O)O[C@H]3[C@H]([C@@H]([C@](CO3)(C)O)NC)O)N)N)N)O)O)O	Active	Non-active	Active	Active	Non-active	Active
24837307	CCC(C)C(=O)OC(C)C1(C(OC(CC1OC)OC2C(C(OC(C2OC(=O)/C(=C/C)/NC(=S)SCC(C(=O)O)NC(=O)C)COC(=O)C)C3(CC(=O)C(=C(C3=O)C(=O)O)N)O)O)C)O	Active	Non-active	Active	Active	Non-active	Active
126417	COC1=CC=C(C=C1)[C@@H]2[C@@H]3[C@@H]([C@H](CN3)O)O[C@H]4[C@@H]([C@H]([C@H](O4)CO2)O)O	Active	Non-active	Active	Active	Active	Non-active
3035952	CC1[C@@H]([C@@]2(N3C4=CC=CC=C4C5=C6CNC(=O)C6=C7C8=CC=CC=C8N([C@H]1O2)C7=C53)C)C(=O)OOC	Active	Non-active	Active	Active	Non-active	Active
57369750	CC[C@H]([C@H]1[C@H](C[C@@H]([C@@H](O1)[C@@H](C)[C@@H]([C@H](C)C(=O)[C@H](CC)[C@@H]2[C@H](C[C@H]([C@]3(O2)C=C[C@H]([C@@]4(O3)CCC(O4)(CC)[C@H]5CC[C@@]([C@@H](O5)C)(CC)O)O)C)C)O)C)C)C(=O)O	Active	Non-active	Active	Active	Non-active	Active
447364	C1=CC(=C(C=C1CC(=O)O)[N+](=O)[O-])O	Active	Non-active	Active	Active	Non-active	Active
191398	C([C@@H](C(=O)O)N)NC(=O)NO	Active	Non-active	Active	Active	Non-active	Active
160577	C1C(=C(N2[C@H](S1)[C@@H](C2=O)NC(=O)CCC[C@H](C(=O)O)N)C(=O)O)CO	Active	Non-active	Active	Active	Non-active	Active
5128452	CCC(=O)OC1CC(=O)OC(CC=CC=CC(C(CC(C(C1OC)OC2C(C(C(C(O2)C)OC3CC(C(C(O3)C)OC(=O)CC)(C)O)N(C)C)O)CC=O)C)O)C	Active	Non-active	Active	Non-active	Active	Non-active
2774186	C1=CC(=C(C=C1CCC(=O)O)[N+](=O)[O-])O	Active	Non-active	Active	Active	Non-active	Active
6449925	CC[C@@](C(=O)N[C@H]1[C@@H](OC(=O)[C@H](NC(=O)[C@@H]2CCCNN2C(=O)[C@H](N(C(=O)[C@@H](N(C(=O)[C@H]3CCCNN3C1=O)O)C)C)C)[C@H](C)O)C(C)C)([C@]4(CC[C@@H]([C@H](O4)/C(=C/[C@H](C)C(=O)/C(=C/C)/C)/C)C)O)O	Active	Non-active	Active	Active	Non-active	Active
6438745	CCC(C(C(C)CC(C)C1C(C(C(/C=C\C(CCC/C=C(/C2C(=CCC(O2)(CC(=O)O1)O)C)\C)OC3CC(C(C(O3)C)O)OC(=O)N)C)O)C)O)C(=O)CC	Active	Non-active	Active	Active	Active	Active
24840715	CCC[C@@H]1CC(N(C1)C)C(=O)N[C@@H]([C@@H]2C(C([C@H](C(O2)SC)O)O)O)C(C)O	Active	Non-active	Active	Active	Non-active	Active
6436179	C[C@@H]1/C=C\C=C(\C(=O)NC2=C(C(=C3C(=C(C(=C4C3=C(/C(=C/[C@@]([C@@H]([C@@H]([C@H]([C@@H]([C@@H]([C@@H](C1O)C)O)C(=O)OC)O)C)O)(C)O)/C)OCO4)C)O)C2=O)OC(=O)C)C)/C	Active	Non-active	Active	Active	Non-active	Active
4526	CC1C(C(C(C(O1)OC2CC(C(C3=C2C(=C4C(=C3)C(=O)C5=C6C(=CC(=C5C4=O)O)C7(C(C(C(C(O6)O7)O)N(C)C)O)C)O)C(=O)OC)(C)O)OC)(C)OC)OC	Active	Non-active	Active	Active	Non-active	Active
196445	CC[C@@H]1[C@H]2CC(=C(N2C1=O)C(=O)O)SCCNC(=O)C	Active	Non-active	Active	Active	Active	Non-active
5466718	CC1CC/C=C/C=C(/C/C(=C/CC(C(/C=C/C=C/C(=O)NC1)C)OC2CC(C(C(O2)C)NC)O)/C)\C	Active	Non-active	Active	Active	Non-active	Active
5358751	CCCCCC(C1C(CC(CC(CC(CC(CC(C(C(/C(=C/C=C/C=C/C=C/C=C/C(C(OC1=O)C)O)/C)O)O)O)O)O)O)O)O)O	Active	Non-active	Active	Active	Non-active	Active
6438326	C[C@H]1/C=C/C=C(\C(=O)NC2=C(C3=C(C4=C(C(=C3O)C)O[C@@](C4=O)(O/C=C/[C@@H]([C@H]([C@H]([C@@H]([C@@H]([C@@H]([C@H]1O)C)O)C)OC(=O)C)C)OC)C)C(=C2N5CCC(CC5)C(C6CCCCC6)C7CCCCC7)O)O)/C	Active	Non-active	Active	Active	Non-active	Active
3419361	CC1=C(C(=O)C2=C(C1=O)N3CC4C(C3(C2COC(=O)C)OC)N4)N5CCCCC5	Active	Non-active	Active	Active	Non-active	Active
24837375	C[C@@H]1CC[C@@H](O[C@@]12[C@H](C[C@@H](O2)[C@@H]3[C@H](C[C@H]([C@@](O3)(CO)O)C)C)C)[C@@]4(CC[C@@]5(O4)[C@@H](C(C[C@H](O5)[C@@H](C)/C=C(\C)/C(=O)[C@H](C)C[C@H](C)C(=O)O)O[C@H]6CC[C@@H]([C@H](O6)C)OC)C)C	Active	Non-active	Active	Non-active	Active	Non-active
149913	COC1=C(C=C2C(=C1)C(=O)N3CCCC3C=N2)O	Active	Non-active	Active	Active	Non-active	Active
54679290	CC[C@H](C(=O)NC/C=C/C=C(\C)/[C@H]([C@@H](C)[C@H]1[C@H]([C@H]([C@H](O1)/C=C/C=C/C=C(\C)/C(=C\2/C(=O)C=CN(C2=O)C)/O)O)O)OC)[C@@]3(C[C@@H](C([C@@H](O3)/C=C/C=C/C)(C)C)O)O	Active	Non-active	Active	Active	Non-active	Active
24846608	CO/C(=C\C1=CC(=C(C=C1)O)O)/C(=O)OCC2=C(N3[C@@H]([C@@](C3=O)(NC(=O)CCC[C@H](C(=O)O)N)OC)SC2)C(=O)O	Active	Non-active	Active	Active	Non-active	Active
23702780	CO/C(=C\C1=CC(=C(C=C1)O)O)/C(=O)OCC2=C(N3[C@@H]([C@@](C3=O)(NC(=O)CCCC(C(=O)O)N)OC)SC2)C(=O)[O-]	Active	Non-active	Active	Active	Non-active	Active
462379	C[C@@H]1[C@H]([C@@H](C[C@@H](O1)O[C@H]2[C@@H](CC3=C(C2=O)C(=C4C(=C3)C=C(C=C4O)O[C@H]5C[C@H]([C@H]([C@H](O5)C)O[C@@H]6C[C@H]([C@H]([C@H](O6)C)OC)O)OC(=O)C)O)[C@@H](C(=O)[C@H]([C@@H](C)O)O)OC)O[C@H]7C[C@H]([C@@H]([C@H](O7)C)O)O[C@H]8C[C@]([C@H]([C@@H](O8)C)OC(=O)C(C)C)(C)O)O	Active	Non-active	Active	Active	Non-active	Active
72629	C1=C(C(=O)[C@H]2[C@@H]([C@@H]1O)O2)CO	Active	Non-active	Active	Active	Non-active	Active
54697706	CC1C2C(=O)CC3(C(O2)(C(C(O3)C)C(=O)OC)OC1C(C)/C=C(\C)/C=C/C(=C/4\C(=O)CNC4=O)/O)C	Active	Non-active	Active	Active	Non-active	Active
23703106	COC(=O)C1C(C)OC2(C)CC(=O)C3OC12OC(C(C)\C=C(/C)\C=C\C(=O)C1=C(O)CNC1=O)C3C	Active	Non-active	Active	Active	Non-active	Active
23703105	COC(=O)C1C(C)OC2(C)CC(=O)C3OC12OC(C(C)\C=C(/C)\C=C\C(=O)C1=C(O)CN(C)C1=O)C3C	Active	Non-active	Active	Active	Non-active	Active
2274	CC1C(C(=O)N1S(=O)(=O)O)NC(=O)C(=NOC(C)(C)C(=O)O)C2=CSC(=N2)N	Active	Non-active	Active	Active	Non-active	Active
434448	CC1C(=O)NC2CSSCC(C(=O)NC(C(=O)OCC(C(=O)N1)NC(=O)C3=NC4=CC=CC=C4N=C3)C(C)C)NC(=O)C(NC(=O)C(COC(=O)C(NC2=O)C(C)C)NC(=O)C5=NC6=CC=CC=C6N=C5)C	Active	Non-active	Active	Active	Non-active	Active
196696	CC1C(C(CC(O1)OC2CC(CC3=C(C4=C(C(=C23)O)C(=O)C5=C(C4=O)C=CC=C5O)O)(C(=O)C)O)N)OC(CC(C)O)OC(C)C(CC(=O)C)O	Active	Non-active	Active	Active	Non-active	Active
44149170	C[C@@H]1[C@@H]2[C@H](C(=O)N2C(=C1S[C@H]3C[C@H](N(C3)C)C(=O)N4CC[C@@H](C4)NC(=O)CN=C(N)N)C(=O)O)C(C)O	Active	Non-active	Active	Active	Non-active	Active
6443656	CC1/C=C\C=C/C=C\C=C/C=C\C(C(C(CC(CC(CCCC(CC(C(C(=O)OC1C)C)O)O)O)O)O)C)O	Active	Non-active	Active	Active	Non-active	Active
24832796	CC(C(=O)NC(C)C(=O)NC(C)C(=O)NC(CCCN=C(N)N)C(CC(=O)OCC1=C(N2C(C(C2=O)(NC=O)NC(=O)CCCC(C(=O)O)N)SC1)C(=O)O)O)N	Active	Non-active	Active	Active	Non-active	Active
122737	CN1C2CC(C1C3CC4=C(C(N3C2C#N)CO)C(=CC=C4)OC)C(=O)O	Active	Non-active	Active	Active	Non-active	Active
49852378	C(C[C@@H](CC(=O)NCCC[C@@H](CC(=O)NCCC[C@@H](CC(=O)N[C@@H]1[C@@H]([C@H]([C@H](O[C@H]1NC2=N[C@@H]([C@H](N2)[C@@H](CN)O)C(=O)O)CO)OC(=O)N)O)N)N)N)CN	Active	Non-active	Active	Active	Active	Non-active
157391	CCC1(CC(C2=C(C1C(=O)OC)C=C3C(=C2O)C(=O)C4=C(C3=O)C=CC=C4O)OC5CC(C(C(O5)C)OC6CC(C(C(O6)C)O)O)O)O	Active	Non-active	Active	Non-active	Non-active	Non-active
6444844	C/C=C/1\C=CC2=NCCC3C12O3	Active	Non-active	Active	Active	Active	Non-active
6434201	CC(C(=O)O)NC(=O)C(CNC(=O)/C=C/C(=O)N)N	Active	Non-active	Active	Active	Active	Non-active
5477784	C/C=C/C=C/C=C/C(CC(C(C)(/C=C/C1CC=CC(=O)O1)O)OP(=O)(O)O)O	Active	Non-active	Active	Active	Non-active	Active
56843204	CC1[C@H]2C(=O)N[C@H](C(=O)N[C@H](C(=O)N[C@H]3CSC[C@@H](C(=O)N[C@@H](CS1)C(=O)NCCC(=O)N[C@H](C(=O)NCC(=O)N4CCC[C@H]4C(=O)N[C@H](C(=O)N2)CC5=CC=CC=C5)CC6=CC=CC=C6)NC(=O)[C@@H](NC(=O)[C@@H](NC(=O)[C@H](CSC([C@H](NC(=O)[C@@H](NC(=O)CNC(=O)[C@@H](NC3=O)C(C(=O)O)O)CC(=O)N)C(=O)N[C@@H](CCCCN)C(=O)O)C)N)CCCCN)CCC(=O)N)C(C)C)CC7=CC=CC=C7	Active	Non-active	Active	Active	Non-active	Active
54724665	CC1CC(C(C2C1C\3(C(C=C2)/C(=C\CC(/C(=C\C4C=C(C(CC45C(=O)/C(=C3\O)/C(=O)O5)C)CO)/C)OC6CC(C(C(O6)C)NC(=O)OC)(C)[N+](=O)[O-])/C)C)OC7CC(C(C(O7)C)O)OC8CC(C(C(O8)C)OC9CC(C(C(O9)C)OC)O)O)C	Active	Non-active	Active	Active	Active	Non-active
5282049	C[C@@H]1[C@@H]2C[C@]([C@@H](/C=C/C=C(/CC3=CC(=C(C(=C3)OC)Cl)N(C(=O)C[C@@H]([C@]4([C@H]1O4)C)OC(=O)C(C)C)C)\C)OC)(NC(=O)O2)O	Active	Non-active	Active	Active	Non-active	Active
512882	CCC(C(C)C(C(C)C(C(C)C(C(C)C1C(C(CCCC(CC(CC(CC(CC2CC(=O)C(C(C(CCC(CCCC(CC(C(C(CC(=O)O1)O)C)O)O)O)C)O)(C(=O)O2)O)O)O)O)O)O)O)O)O)O)O	Active	Non-active	Active	Active	Non-active	Non-active
24846170	C1C(C(C(C(C1NC(=O)C(CCN)O)O)O)OC2C(C(C(C(O2)CO)O)O)N)N	Active	Non-active	Active	Active	Non-active	Active
22568556	CC1CC(=O)C2(C(O1)OC3C(C(C(C(C3O2)NC)O)NC)O)O	Active	Non-active	Active	Active	Non-active	Active
3080935	CSC[C@@H](C=O)NC(=O)C(C(=O)OC[C@H]([C@@H](C1=CC=C(C=C1)S(=O)(=O)C)O)NC(=O)C(Cl)Cl)N	Active	Non-active	Active	Active	Non-active	Active
3083714	C[C@H]([C@H]1C(=O)NCC[C@@H](C(=O)N[C@H](C(=O)N[C@@H](C(=O)N[C@H](C(=O)N[C@H](C(=O)N[C@H](C(=O)N1)CCN)CCN)CC(C)C)CC2=CC=CC=C2)CCN)NC(=O)[C@H](CCN)NC(=O)[C@H]([C@@H](C)O)NC(=O)[C@H](CCN)NC(=O)O)O	Active	Non-active	Active	Active	Non-active	Active
56841822	CO[C@H]1C[C@@H](O[C@H]2C[C@@H](O[C@H]2[C@@]2(C)CC[C@H](O2)[C@@]2(C)CC[C@]3(C[C@H](O)[C@@H](C)[C@H](O3)[C@@H](C)[C@@H]3O[C@](O)(CC(O)=O)[C@@H](C)[C@H](OC)[C@H]3OC)O2)[C@H]2O[C@](C)(O)[C@H](C)C[C@@H]2C)O[C@@H](C)[C@@H]1OC	Active	Non-active	Active	Active	Non-active	Active
16129631	CCCC1C(O1)C(=O)N[C@@H](CO)C(=O)N[C@H]2C(OC(=O)[C@@H](NC(=O)[C@@H](NC(=O)[C@H](NC(=O)CNC(=O)[C@@H](NC(=O)[C@H](NC(=O)[C@@H](NC(=O)[C@@H](NC(=O)[C@H](NC2=O)CC3=CNC4=CC=CC=C43)CC(=O)O)CC(=O)O)C5=CC=C(C=C5)O)CC(=O)O)[C@@H](C(=O)N)O)C(C)CC(=O)O)CC6=CNC7=CC=CC=C76)C	Active	Non-active	Active	Active	Non-active	Active
5360373	CC1=C(N=C(N=C1N)[C@H](CC(=O)N)NC[C@@H](C(=O)N)N)C(=O)N[C@@H]([C@H](C2=CN=CN2)OC3C(C(C(C(O3)CO)O)O)OC4C(C(C(C(O4)CO)O)OC(=O)N)O)C(=O)N[C@H](C)[C@H]([C@H](C)C(=O)N[C@@H]([C@@H](C)O)C(=O)NCCC5=NC(=CS5)C6=NC(=CS6)C(=O)NCCC[S+](C)C)O	Active	Active	Active	Active	Non-active	Active
30323	C[C@H]1[C@H]([C@H](C[C@@H](O1)O[C@H]2C[C@@](CC3=C(C4=C(C(=C23)O)C(=O)C5=C(C4=O)C=CC=C5OC)O)(C(=O)C)O)N)O	Active	Non-active	Active	Active	Non-active	Active
18469537	C1C(C(C(C(C1N)OC2C(C(C(C(O2)CN)O)O)N)OC3C(C(C(O3)CO)O)O)O)N	Active	Non-active	Active	Active	Non-active	Active
3467	CC(C1CCC(C(O1)OC2C(CC(C(C2O)OC3C(C(C(CO3)(C)O)NC)O)N)N)N)NC	Active	Non-active	Active	Active	Non-active	Active
6436160	C[C@H]1C=CC2(C[C@@H]3C[C@H](O2)C/C=C(/C([C@H](/C=C/C=C/4\CO[C@H]5[C@@]4([C@@H](C=C([C@H]5O)C)C(=O)O3)O)C)O[C@H]6C[C@@H]([C@H]([C@@H](O6)C)O[C@H]7C[C@@H]([C@H]([C@@H](O7)C)O)OC)OC)\C)O[C@@H]1C(C)C	Active	Non-active	Active	Active	Non-active	Active
5476829	CC1=CC2C3(CC1)COC(=O)/C=C(/CCOC(/C=C/C=C/C(=O)OC4C3(C5(CO5)C(C4)O2)C)C(C)O)\C	Active	Non-active	Active	Non-active	Non-active	Active
6156652	CC(C)CCCC(C)C1CCC2C1(CCC3C2CC=C4C3(CC/C(=N\NC(=O)N)/C4)C)C	Active	Non-active	Active	Active	Non-active	Active
415844	CC1=C(C2=C(C=C1)C(=C3CC4C(C(=O)C(=C(C4(C(=O)C3=C2O)O)O)C(=O)C)N)C)O	Active	Non-active	Active	Active	Non-active	Non-active
149075	CC1CC12C(=O)OCC(C(=O)NC(C(=O)N(C3C(SCC(C(=O)N2C)N(C(=O)C(NC(=O)C(COC(=O)C4(CC4C)N(C3=O)C)NC(=O)C5=NC6=CC=CC=C6C=C5O)C)C)SC)C)C)NC(=O)C7=NC8=CC=CC=C8C=C7O	Active	Non-active	Active	Active	Non-active	Non-active
16130201	CC[C@H](C)[C@H]1C(=O)N[C@H](C(=O)NCC(=O)N[C@H](C(=O)N[C@H](C(=O)N[C@H](C(=O)N[C@H](C(=O)N[C@H](C(=O)N[C@H]2CSSC[C@H]3C(=O)NCC(=O)N[C@H](C(=O)NCC(=O)N[C@H](C(=O)N[C@H](C(=O)N[C@H](C(=O)N[C@H](C(=O)NCC(=O)N[C@H](C(=O)N[C@@H](CSSC[C@@H](C(=O)N[C@H](C(=O)NCC(=O)N[C@H](C(=O)N[C@H](C(=O)N3)CC(C)C)CC4=CC=CC=C4)CCCNC(=N)N)NC(=O)[C@@H](NC(=O)[C@H](CSSC[C@H](NC2=O)C(=O)N[C@@H](CCCNC(=N)N)C(=O)N[C@@H](CCCNC…	Active	Non-active	Active	Active	Non-active	Active
5351601	CN1CCC2=CC(=C(C3=C2[C@H]1CC4=CC=C(COC5=C(C=C6CCNC(=C6C5=O)CC7=CC=C(O3)C=C7)OC)C=C4)OC)OC	Active	Non-active	Active	Active	Non-active	Active
54697255	C[C@@H]1CCC[C@@H]([C@H]1[C@H](C)/C(=C\2/C(=O)COC2=O)/O)/C=C(\CO)/[C@H]3[C@@H](CCC(O3)/C=C/[C@H](C)[C@H]4[C@H](C[C@@H](O4)[C@H](C)OC)C)C	Active	Non-active	Active	Active	Non-active	Active
5386800	C1=CC(=C(C(=C1)O)O)/C=C/NC=O	Active	Non-active	Active	Active	Non-active	Active
54605810	CC1C/C=C/C=C/C(C(CC(C(C(C(CC(=O)O1)O)OC)OC2C(C(C(C(O2)C)OC3CC(C(C(O3)C)O)(C)O)N(C)C)O)CC=O)C)OC4CCC(C(O4)C)N(C)C	Active	Non-active	Active	Active	Non-active	Active
2262	CCC(C)C1C(C=CC2(O1)CC3CC(O2)CC=C(C(C(C=CC=C4COC5C4(C(C=C(C5O)C)C(=O)O3)O)C)OC6CC(C(C(O6)C)OC7CC(C(C(O7)C)O)OC)OC)C)C	Active	Non-active	Active	Active	Non-active	Non-active
195548	CC1=C(C=C2C(=C1O)C(=O)C3(CC(C(OC3(C2=O)CC4C(=C)CCC(C4(C)C)Cl)(C)C)Cl)Cl)O	Active	Non-active	Active	Non-active	Active	Non-active
1959	CC1CCC2(C(CC(C(O2)C(C)C(=O)C3=CC=CN3)C)C)OC1CC4=NC5=C(O4)C=CC(=C5C(=O)O)NC	Active	Non-active	Active	Active	Non-active	Active
16130057	CCC(=O)OC1CC=NN2C1C(=O)NCC(=O)N(CC(=O)N(C(C(=O)OCC(C(=O)N3C(C(CC=N3)OC(=O)C)C(=O)NCC(=O)N(CC(=O)N(C(C(=O)OCC(C2=O)NC(=O)C4=C(C=C5C=C(C=CC5=N4)OC)O)C(C)(C)O)C)C)NC(=O)C6=C(C=C7C=C(C=CC7=N6)OC)O)C(C)(C)O)C)C	Active	Non-active	Active	Active	Non-active	Active
13248214	CN1CN(C(=O)NC1=O)[C@H]2C[C@@H]([C@H](O2)CO)O	Active	Non-active	Active	Active	Non-active	Active
57369801	CC1C=CC=C2COC3C2(C(C=C(C3O)C)C(=O)OC4CC(CC=C(C1OC5CC(C(C(O5)C)OC6CC(C(C(O6)C)O)OC)OC)C)OC7(C4)C=CC(C(O7)C(C)C)C)O	Active	Non-active	Active	Active	Non-active	Active
5351459	CCCC1C/C=C/C=C/C=C/C=C/C(CC(C(C(CC(=O)CC(CCCC(=O)CC(C(C(=O)O1)CC)O)O)O)C(=O)O)O)OC2C(C(C(C(O2)C)O)N)O	Active	Non-active	Active	Active	Non-active	Active
6478433	CCC1C(/C=C/C(=O)C(C(C(CC(C(=O)O1)C)C)OC2C(CCCO2)O)C)(C)O	Active	Non-active	Active	Active	Non-active	Active
23675938	CCOC(=O)C1C(CC(O1)C2(C(C(C3(O2)C(C=CC4(O3)C(CC(C(O4)C(C)C(=O)C(C)C(C(C)CC(C)C5=C(C=C(C(=C5C(=O)[O-])O)C)Cl)O)C)C)O)C)OC)C)O	Active	Non-active	Active	Active	Non-active	Active
3081746	CC[C@@H]1[C@H](C=C(C=CC(=O)[C@@H](C[C@@H]([C@@H]([C@H](CCC(=O)O1)C)O[C@H]2[C@@H]([C@H](C[C@H](O2)C)N(C)C)O)CC=O)C)C)CO	Active	Non-active	Active	Active	Non-active	Active
195786	CCCC1=C2C(=CC(=C1)O)C(=O)C3=CC(=CC(=C3C2=O)O)O	Active	Non-active	Active	Active	Non-active	Active
99830	CC1C(C(=O)NC(C(=O)NC(C(=O)NCC(=O)N2CCC(C2C(=O)NC(=CC3=CNC4=CC=CC=C43)C(=O)NC(C(=O)NC(C(=O)N5CCC(C5C(=O)O1)O)C(C(C)C)O)C(C)C6=CNC7=CC=CC=C76)O)C)C(C)O)CNC(=O)C(CO)NC(=O)CC(C(=O)O)N	Active	Non-active	Active	Non-active	Non-active	Non-active
16760319	CC1=C(N=C(N=C1N)C(CC(=O)N)NCC(C(=O)N)N)C(=O)NC(C(C2=CN=CN2)OC3C(C(C(C(O3)CO)O)O)OC4C(C(C(C(O4)CO)O)OC(=O)N)O)C(=O)NC(C)C(C(C)C(=O)NC(C(C)O)C(=O)NCCC5=NC(=CS5)C6=NC(=CS6)C(=O)NCCCNCCCCN)O	Active	Non-active	Active	Active	Non-active	Active
446111	CN[C@H]1C[C@H]([C@@H]([C@H]([C@@H]1O)O[C@H]2[C@H]3[C@H](C([C@H](O2)CO)O)O[C@@]4(O3)[C@@H]([C@@H]([C@H]([C@@H](O4)[C@H](CO)N)O)O)O)O)N	Active	Non-active	Active	Active	Non-active	Active
446987	C[C@H]1[C@H](O1)P(=O)(O)O	Active	Non-active	Active	Active	Non-active	Active
6433273	CC[C@@H]1C(/C=C(/C=C/C(=O)[C@@H](C[C@@H]([C@@H](C([C@@H](CC(=O)O1)O)C)O[C@H]2[C@@H]([C@H]([C@@H]([C@H](O2)C)O[C@H]3C[C@@]([C@H]([C@@H](O3)C)O)(C)O)N(C)C)O)CC=O)C)\C)COC4[C@@H]([C@@H]([C@@H]([C@H](O4)C)O)OC)OC	Active	Non-active	Active	Active	Non-active	Active
2142	C1C(C(C(C(C1NC(=O)C(CCN)O)OC2C(C(C(C(O2)CO)O)N)O)O)OC3C(C(C(C(O3)CN)O)O)O)N	Active	Non-active	Active	Active	Non-active	Active
57369779	CCCCCCCCCC(=O)N[C@@H]1[CH][CH][CH]O[C@H]1OC2=C3C=C4C=C2OC5=C(C=C(C[C@@H]6C(=O)N[C@@H](C7=CC(=CC(=C7)O)OC8=C(C=CC(=C8)[C@H](C(=O)N6)N)O)C(=O)N[C@H]4C(=O)N[C@@H]9C1=CC(=C(C=C1)O)C1=CC=CC=C1[CH]NC(=O)[C@H]([CH]C1=CC=C(O3)C=C1)NC9=O)C=C5)Cl	Active	Non-active	Active	Active	Non-active	Active
57369668	CCC1CCCC(O1)C2CCC(O2)C3CCC(O3)CC4CCCC(O4)CC5CCCC(O5)C(C)C	Active	Non-active	Active	Active	Non-active	Active
57369590	C[C@@H]1[CH][CH]C[C@@H](O1)O[C@@H]2C[C@@H](O[C@@H]([C@@H]2O)C)OC3=CC4=CC5=C(C=C4C(=C3C)O)C(=O)[C@H]([C@@H](C5)[C@@H](C(=O)[C@H]([C@@H](C)O)O)OC)O[C@H]6C[C@H]([C@@H]([C@H](O6)C)O)O[C@H]7C[C@H]([C@@H]([C@H](O7)C)O)O[C@H]8C[C@]([C@@H]([C@H](O8)C)O)(C)O	Active	Non-active	Active	Active	Non-active	Active
46782767	C[C@@H]1CCC23CCC(=O)[C@H]2C1([C@@H](C[C@@]([C@H]([C@@H]3C)O)(C)C=C)OC(=O)CO)C	Active	Non-active	Active	Active	Non-active	Active
5488863	C[C@@H]1[C@H](CC=CC=CC=C[C@@H](CC(=O)NC2=CC(=O)C=C(C2=O)CCC=C([C@@H]1O)C)OC)OC(=O)[C@@H](C)NC(=O)C3CCCCC3	Active	Non-active	Active	Active	Non-active	Active
441444	C1C=CCC(=C1)C[C@@H](C(=O)O)N	Active	Non-active	Active	Active	Non-active	Active
195531	C1=C(C(=O)ON1)CCC(=O)ON	Active	Non-active	Active	Active	Non-active	Active
162092	CC(C)C(=C)CCC(C)C1CCN=C2[C@@]1(CCC3=C2CC[C@@H]4[C@@]3(CC[C@@H](C4)O)C)C	Active	Non-active	Active	Active	Non-active	Active
124692	CC1C(C(CC(O1)C2=C(C3=C(C=C2)C(=O)C4=C(C3=O)C(OC5C4OC(=O)C5)C)O)N(C)C)O	Active	Non-active	Active	Active	Non-active	Active
53397745	CCC1C(CCC2(O1)CC3CC(O2)CC=C(CC(C=CC=C4COC5C4(C(C=C(C5O)C)C(=O)O3)O)C)C)C	Active	Non-active	Active	Non-active	Active	Non-active
24846002	CC1C(C(CC(O1)O[C@H]2C3C(=O)N[C@@H](C4=CC(=CC(=C4C5=C(C=CC(=C5)[C@H](C(=O)N3)NC(=O)C6C7=CC(=C(C(=C7)OC8=CC=C2C=C8)OC9C(C(C(C(O9)COC1C(C(C(C(O1)C)O)O)O)O)O)OC1C(C(C(C(O1)CO)O)O)OC1C(C(C(CO1)O)O)O)OC1=CC=C(C=C1)[C@H]([C@@H]1C(=O)N[C@@H](C2=CC(=C(C(=C2)O)C)OC2=C(C=CC(=C2)[C@H](C(=O)N1)N)O)C(=O)N6)O)O)OC1C(C(C(C(O1)CO)O)O)O)O)C(=O)O)N)O	Active	Non-active	Active	Active	Non-active	Active
16157662	CC(=O)OC1CC=NN2C1C(=O)NCC(=O)N(CC(=O)N(C(C(=O)OCC(C(=O)N3C(C(CC=N3)OC(=O)C)C(=O)NCC(=O)N(CC(=O)N(C(C(=O)OCC(C2=O)NC(=O)C4=C(C=C5C=C(C=CC5=N4)OC)O)C(C)(C)O)C)C)NC(=O)C6=C(C=C7C=C(C=CC7=N6)OC)O)C(C)(C)O)C)C	Active	Non-active	Active	Active	Non-active	Active
6917067	CC[C@@H]1[C@@]([C@@H]2[C@H]([C@H]([C@@H](C[C@@]([C@@H]([C@H]([C@@H]([C@H](C(=O)O1)C)O[C@H]3C[C@@]([C@H]([C@@H](O3)C)O)(C)OC)C)O[C@H]4[C@@H]([C@H](C[C@H](O4)C)N(C)C)O)(C)O)C)N[C@H](O2)COCCOC)C)(C)O	Active	Non-active	Active	Active	Non-active	Active
6433412	C[C@@H]1C[C@@H]([C@@H]([C@H]([C@@H](CC(=O)O[C@@H](CC2C(O2)/C=C/C1=O)C)OC(=O)C)OC)O[C@H]3[C@@H]([C@H]([C@@H]([C@H](O3)C)O[C@H]4C[C@@]([C@H]([C@@H](O4)C)OC(=O)CC(C)C)(C)O)N(C)C)O)CC=O	Active	Non-active	Active	Active	Non-active	Active
6324616	C[C@H]1/C=C/C=C(\C(=O)NC2=CC(=C3C(=C2O)C(=C(C4=C3C(=O)[C@](O4)(O/C=C/[C@@H]([C@H]([C@H]([C@@H]([C@@H]([C@@H]([C@H]1O)C)O)C)OC(=O)C)C)OC)C)C)O)O)/C	Active	Non-active	Active	Non-active	Active	Non-active
5282176	CCCC[C@H](/C=C(\C)/C=C/C=C/C(=O)N1CCCC1=O)O	Active	Non-active	Active	Active	Non-active	Active
3084072	C[C@@H]1[C@@H]([C@@H](C[C@@H](O1)OC2=CC3=CC4=C(C(=O)[C@H]([C@@H](C4)[C@@H](C(=O)[C@H]([C@@H](C)O)O)OC)O[C@@H]5C[C@@H]([C@H]([C@@H](O5)C)O)OC6C[C@@H]([C@H]([C@@H](O6)C)O)O)C(=C3C(=C2)O)O)O[C@H]7C[C@@H]([C@@H]([C@@H](O7)C)OC)O)O	Active	Non-active	Active	Active	Non-active	Active
54885	CC1=NN(N=N1)CC2=C(N3[C@@H]([C@@H](C3=O)NC(=O)C(=NOC)C4=CSC(=N4)N)SC2)C(=O)OCOC(=O)C(C)(C)C	Active	Non-active	Active	Non-active	Non-active	Active
8974	C1=NC2=C(N1[C@H]3[C@@H]([C@@H]([C@H](O3)CO)O)O)N=C(N=C2N)Cl	Active	Non-active	Active	Active	Non-active	Active
11953962	C[C@@H]([C@H]1[C@H]2CC(=C(N2C1=O)C(=O)O)S/C=C/NC(=O)C)OS(=O)(=O)O	Active	Non-active	Active	Non-active	Non-active	Non-active
252579	CCC(=O)OC(C1=CC=C(O1)[N+](=O)[O-])OC(=O)CC	Active	Non-active	Active	Active	Non-active	Active
6440717	C[C@@H]1C/C=C/C=C/[C@@H]([C@@H](C[C@@H]([C@@H]([C@H]([C@@H](CC(=O)O1)O)OC)O[C@H]2[C@@H]([C@H]([C@@H]([C@H](O2)C)O[C@H]3C[C@@]([C@H]([C@@H](O3)C)O)(C)O)N(C)C)O)CC=O)C)O[C@H]4CC[C@@H]([C@@H](O4)C)N(C)C	Active	Non-active	Active	Active	Non-active	Active
116733	CC(C(=O)NC(C)C(=O)O)NC(=O)C(CCP(=O)(C)O)N	Active	Non-active	Active	Active	Non-active	Active
44629935	C[C@@H]1C/C=C/C=C/[C@@H]([C@@H](C[C@@H]([C@@H]([C@H]([C@@H](CC(=O)O1)O)OC)O[C@H]2[C@@H]([C@@H](C([C@H](O2)C)O[C@H]3C[C@@]([C@H](C(O3)C)O)(C)O)N(C)C)O)CC=O)C)O[C@H]4CC[C@@H]([C@H](O4)C)N(C)C	Active	Non-active	Active	Active	Active	Active
23665592	[B-]123OC4C(=O)O[C@H]5C[C@@H](/C=C/C[C@H](C([C@@H]6CC[C@H](C(O1)(O6)C(O2)C(=O)OC7CC(/C=C/C[C@H](C([C@@H]8CC[C@H](C4(O3)O8)C)(C)C)O)O[C@@H]7C)C)(C)C)O)O[C@@H]5C	Active	Non-active	Active	Active	Non-active	Active
6434533	CCC1C(/C=C(/C=C/C(=O)C(CC(C(C(C(CC(=O)O1)O)C)OC2C(C(CC(O2)C)N(C)C)O)CC=O)C)\C)C	Active	Non-active	Active	Active	Non-active	Active
15559317	C[C@@H]1C/C=C/C=C/C([C@@H](C[C@@H]([C@@H]([C@H]([C@@H](CC(=O)O1)O)OC)O[C@@H]2[C@@H]([C@H]([C@@H]([C@H](O2)C)O[C@H]3C[C@@]([C@H]([C@@H](O3)C)O)(C)O)N(C)C)O)CC=O)C)O[C@H]4CC[C@@H]([C@H](O4)C)N(C)C	Active	Non-active	Active	Active	Non-active	Active
657368	CC[C@@H]1[C@H]([C@H]2[C@@](O2)(C=CC(=O)[C@@H](C[C@@H]([C@@H]([C@H]([C@@H](CC(=O)O1)O)C)O[C@H]3[C@@H]([C@H](C[C@H](O3)C)N(C)C)O)CC=O)C)C)C	Active	Non-active	Active	Active	Non-active	Active
512872	C1CC(=N[C@@H]1C(=O)N[C@H]2[C@H]([C@@H]([C@H]([C@@H]([C@H]2O)O[C@H]3[C@H]([C@H]([C@@H]([C@H](O3)CO)O[C@@H]4[C@@H]([C@H]([C@@H]([C@H](O4)CO)O)O)NC(=O)[C@H](CCCN=C(N)N)N)O)O)OC(=O)N)O)O)N	Active	Non-active	Active	Non-active	Active	Non-active
46173896	CC(C)(CO)[C@H](C(=O)NCCC(=O)NCCS[C@H]1C[C@@H]2[C@@H](C(=O)N2[C@H]1C(=O)O)C(C)(C)O)O	Active	Non-active	Active	Active	Non-active	Active
16727691	CCCC[C@H]1C(=O)O[C@@H](C(=O)N([C@H](C(=O)O[C@@H](C(=O)N([C@H](C(=O)O[C@@H](C(=O)N1C)C(C)C)CCCC)C)C(C)C)C(C)CC)C)C(C)C	Active	Non-active	Active	Active	Non-active	Active
9851257	CCC1C(C2C(O2)(/C=C/C(=O)C(CC(C(C(C(CC(=O)O1)O)C)O[C@H]3[C@@H]([C@H](C[C@H](O3)C)N(C)C)O)CC=O)C)C)C	Active	Non-active	Active	Active	Non-active	Active
5458384	CCC1[C@@H](C2[C@](O2)(/C=C/C(=O)[C@@H](C[C@@H]([C@@H]([C@H]([C@@H](CC(=O)O1)O)C)OC3C(C(CC(O3)C)N(C)C)O)CC=O)C)C)C	Active	Non-active	Active	Active	Non-active	Active
44629880	C1[C@H]([C@H]([C@H]([C@@H](C1N)OC2C(CC([C@@H](O2)CN)O)N)O)OC3C([C@H](C([C@@H](O3)CO)O)N)O)N	Active	Non-active	Active	Non-active	Active	Active
16220018	C1[C@@H]([C@H]([C@@H]([C@H]([C@@H]1N)O[C@@H]2[C@@H]([C@@H]([C@@H]([C@H](O2)CO)O)N)O)O)O[C@@H]3[C@@H](C[C@@H]([C@H](O3)CN)O)N)N	Active	Non-active	Active	Active	Non-active	Active
13116	CC1=C(C(=O)C2=C(C1=O)N3C[C@H]4[C@@H]([C@@]3([C@@H]2COC(=O)N)OC)N4C)N	Active	Non-active	Active	Active	Non-active	Active
57336511	CCCCCCCCCC(=O)N[C@@H](CC1=CNC2=CC=CC=C21)C(=O)N[C@@H](CC(=O)N)C(=O)N[C@@H](CC(=O)O)C(=O)NC3C(OC(=O)[C@@H](NC(=O)[C@@H](NC(=O)C(NC(=O)CNC(=O)[C@@H](NC(=O)[C@H](NC(=O)C(NC(=O)[C@H](NC(=O)CNC3=O)CCCN)CC(=O)O)C)CC(=O)O)CO)[C@@H](C)CC(=O)O)CC(=O)C4=CC=CC=C4N)C	Active	Non-active	Active	Active	Non-active	Active
656509	CCC[C@@H]1CC(N(C1)C)C(=O)N[C@@H]([C@@H]2[C@@H]([C@@H]([C@H]([C@H](O2)SC)O)O)O)[C@@H](C)O	Active	Non-active	Active	Active	Non-active	Active
475319	CO[C@@]1([C@@H]2N(C1=O)C(=C(CS2)COC(=O)N)C(=O)[O-])NC(=O)CC3=CC=CS3	Active	Non-active	Active	Active	Non-active	Active
458034	C[C@@H]1C(=O)N([C@H]2CSC([C@@H](C(=O)N([C@H](C(=O)OC[C@H](C(=O)N1)NC(=O)C3=NC4=CC=CC=C4N=C3)C(C)C)C)N(C(=O)[C@H](NC(=O)[C@@H](COC(=O)[C@@H](N(C2=O)C)C(C)C)NC(=O)C5=NC6=CC=CC=C6N=C5)C)C)SC)C	Active	Non-active	Active	Active	Non-active	Active
456832	C[C@H]1C[C@@H]([C@H]([C@@H](O1)O[C@H]2[C@@H](C[C@@]3(CO3)C(=O)[C@@H]([C@@H]([C@H]([C@@H](OC(=O)[C@H]([C@H]([C@H]2C)O[C@H]4C[C@@H]([C@H]([C@@H](O4)C)O)OC)C)C)C)O)C)C)O)N(C)C	Active	Non-active	Active	Active	Non-active	Active
452550	CC(C)C[C@H]1C(=O)N[C@@H](C(=O)N2CCC[C@H]2C(=O)N[C@H](C(=O)N[C@@H](C(=O)[C@@H](NC(=O)[C@@H](N[C@H](C(=O)N[C@H](C(=O)N[C@H](C(=O)N1)CCCN)C(C)C)CC3=CC=C(C=C3)O)CCC(=O)O)CC(=O)N)CC4=CC=CC=C4)CC5=CC=CC=C5)CC6=CC=CC=C6	Active	Non-active	Active	Active	Non-active	Active
447043	CC[C@@H]1[C@@]([C@@H]([C@H](N(C[C@@H](C[C@@]([C@@H]([C@H]([C@@H]([C@H](C(=O)O1)C)O[C@H]2C[C@@]([C@H]([C@@H](O2)C)O)(C)OC)C)O[C@H]3[C@@H]([C@H](C[C@H](O3)C)N(C)C)O)(C)O)C)C)C)O)(C)O	Active	Non-active	Active	Active	Non-active	Active
441375	C1[C@H]([C@@H]([C@H]([C@@H]([C@H]1N)O[C@@H]2[C@@H]([C@H]([C@@H]([C@H](O2)CO)O)O)N)O[C@H]3[C@@H]([C@@H]([C@H](O3)CO)O[C@@H]4[C@@H]([C@H]([C@@H]([C@@H](O4)CN)O)O)N)O)O)N	Active	Non-active	Active	Active	Non-active	Active
441242	CO[C@]1(NC(=O)C(C(O)=O)C2=CC=C(O)C=C2)[C@H]2OCC(CSC3=NN=NN3C)=C(N2C1=O)C(O)=O	Active	Non-active	Active	Active	Non-active	Active
441139	C[C@H]1C(=O)N[C@H](C(=O)O[C@@H](C(=O)NC(C(=O)O[C@H](C(=O)N[C@H](C(=O)O[C@@H](C(=O)N[C@@H](C(=O)O[C@H](C(=O)N[C@H](C(=O)O[C@@H](C(=O)N[C@@H](C(=O)O1)C(C)C)C(C)C)C(C)C)C)C(C)C)C(C)C)C(C)C)C)C(C)C)C(C)C)C(C)C	Active	Non-active	Active	Active	Non-active	Active
418931	CC1CC(C(C(O1)OC2C(CC3(CO3)C(=O)C(C(C(C(OC(=O)C(C(C2C)OC4CC(C(C(O4)C)OC(=O)C)OC)C)C)C)OC(=O)C)C)C)OC(=O)C)N(C)C	Active	Non-active	Active	Non-active	Non-active	Non-active
202225	C[C@@H]1C[C@@H]([C@H]([C@@H](O1)O[C@H]2[C@H](C[C@@]3(CO3)C(=O)[C@@H]([C@H]([C@H]([C@H](OC(=O)[C@@H]([C@H]([C@@H]2C)O[C@H]4C[C@@H]([C@H]([C@@H](O4)C)OC(=O)C)OC)C)C)C)OC(=O)C)C)C)OC(=O)C)N(C)C	Active	Non-active	Active	Active	Non-active	Active
197072	CCC(C)CCCCC(=O)N[C@@H](CCN)C(=O)N[C@@H]([C@@H](C)O)C(=O)N[C@@H](CCN)C(=O)N[C@H]1CCNC(=O)[C@@H](NC(=O)[C@@H](NC(=O)[C@@H](NC(=O)[C@@H](NC(=O)[C@H](NC(=O)[C@@H](NC1=O)CCN)CC(C)C)[C@@H](C)O)CCN)CCN)[C@@H](C)O	Active	Non-active	Active	Active	Non-active	Active
166592	CC(=O)OCC1=C(N2[C@@H]([C@@H](C2=O)NC(=O)[C@@H](C3=CC=CC=C3)N)SC1)C(=O)O	Active	Non-active	Active	Active	Non-active	Active
134931	CC1(C)SC2C(NC(=O)C(C3=CC=CC=C3)S(O)(=O)=O)C(=O)N2C1C([O-])=O	Active	Non-active	Active	Active	Non-active	Active
83933	CC[C@@H]1[C@@]([C@@H]([C@H](C(=O)[C@@H](C[C@@]([C@@H]([C@H]([C@@H]([C@H](C(=O)O1)C)O[C@H]2C[C@@]([C@H]([C@@H](O2)C)O)(C)O)C)O[C@H]3[C@@H]([C@H](C[C@H](O3)C)N(C)C)O)(C)O)C)C)O)(C)O	Active	Non-active	Active	Non-active	Non-active	Active
73280	C[C@H]1CC[C@@H](O[C@H]1[C@@H](C)C(=O)C)C[C@@H]2C[C@H]([C@H](C3(O2)[C@@H](C[C@@](O3)(C)[C@H]4CC[C@@](O4)(C)[C@H]5[C@H](C[C@@H](O5)[C@@H]6[C@H](C[C@@H]([C@@](O6)(CO)O)C)C)C)C)C)OC	Active	Non-active	Active	Active	Non-active	Active
54737266	CC[C@@H](C)C1C(=C(C(=O)N1)C(=O)C)O	Active	Non-active	Active	Active	Non-active	Active
54726514	CC1=C(C=CC2=C1OC(=O)C(=C2O)NC(=O)C3=CC(=C(C=C3)[O-])CC=C(C)C)O[C@H]4[C@@H]([C@@H]([C@H](C(O4)(C)C)OC)OC(=O)N)O	Active	Non-active	Active	Non-active	Non-active	Non-active
54708749	C[C@@]1([C@H]2C[C@H]3C(C(=O)C(=C([C@]3(C(=O)C2=C(C4=C1C=CC=C4O)O)O)O)C(=O)N)N(C)C)O	Active	Non-active	Active	Active	Non-active	Active
54707177	C[C@@]1([C@H]2C[C@H]3[C@@H](C(=O)C(=C([C@]3(C(=O)C2=C(C4=C1C=CC=C4O)O)O)O)C(=O)NCNCCCC[C@@H](C(=O)O)N)N(C)C)O	Active	Non-active	Active	Active	Non-active	Active
54689773	C[C@H]1[C@@H](OC=C2C1=C(C(=C(C2=O)C(=O)O)O)C)C	Active	Non-active	Active	Active	Non-active	Active
54687131	C[C@@]1(C2C[C@H]3[C@@H](C(=O)C(=C([C@]3(C(=O)C2=C(C4=C1C=CC=C4O)O)O)O)C(=O)NCNCCCC[C@@H](C(=O)O)N)N(C)C)O	Active	Non-active	Active	Active	Active	Active
54682830	CC1C(OC=C2C1=C(C(=C(C2=O)C(=O)O)O)C)C	Active	Non-active	Active	Active	Non-active	Active
54678599	CCC(C)C1C(=C(C(=O)N1)C(=O)C)O	Active	Non-active	Active	Active	Non-active	Non-active
53384937	CC[C@@H]1[C@@]([C@@H]([C@H](C(=O)[C@@H](C[C@@]([C@@H](C([C@@H]([C@H](C(=O)O1)C)O[C@@H]2C[C@]([C@@H]([C@H](O2)C)O)(C)OC)C)O[C@H]3[C@@H]([C@H](C[C@H](O3)C)N(C)C)OC(=O)CC)(C)O)C)C)O)(C)O	Active	Non-active	Active	Active	Non-active	Active
51670069	N[C@@H]1CON=C1O	Active	Non-active	Active	Active	Non-active	Active
46930993	CCCCCCCCCC(=O)N[C@@H](CC1=CNC2=CC=CC=C21)C(=O)N[C@H](CC(=O)N)C(=O)N[C@@H](CC(=O)O)C(=O)N[C@H]3[C@H](OC(=O)[C@@H](NC(=O)[C@@H](NC(=O)[C@H](NC(=O)CNC(=O)[C@@H](NC(=O)[C@H](NC(=O)[C@@H](NC(=O)[C@@H](NC(=O)CNC3=O)CCCN)CC(=O)O)C)CC(=O)O)CO)[C@@H](C)CC(=O)O)CC(=O)C4=CC=CC=C4N)C	Active	Non-active	Active	Active	Non-active	Active
46873952	C1[C@@H]([C@H]([C@H]([C@H]([C@@H]1NC(=O)C(CCN)O)O)O[C@H]2[C@@H]([C@@H]([C@H](O2)CO)O)O)O[C@@H]3[C@@H]([C@H]([C@@H]([C@H](O3)CN)O)O)N)N	Active	Non-active	Active	Active	Non-active	Active
44629934	CC1C(C([C@@H](O1)O[C@@H]2[C@@H]([C@@H]([C@H]([C@H]([C@H]2O)O)N=C(N)N)O)N=C(N)N)O[C@H]3[C@H]([C@H]([C@H]([C@@H](O3)CO)O)O)NC)(C=O)O	Active	Non-active	Active	Active	Non-active	Active
44629874	CC[C@@H]1[C@@]([C@@H]([C@H](C(=O)[C@@H](C[C@@]([C@@H]([C@H]([C@@H]([C@H](C(=O)O1)C)O[C@H]2CC([C@H]([C@@H](O2)C)O)(C)OC)C)O[C@H]3C([C@@H](CC(O3)C)N(C)C)O)(C)O)C)C)O)(C)O	Active	Non-active	Active	Active	Non-active	Active
46173365	CO\N=C(/C(=O)N[C@H]1[C@H]2SCC(CSC3=NC(=O)C(O)=NN3C)=C(N2C1=O)C([O-])=O)C1=CSC(N)=N1	Active	Non-active	Active	Active	Non-active	Active
44135221	CC(C)C(C(=O)NC(CCCCNC(=O)CCCCC1C2C(CS1)NC(=O)N2)C(=O)NC(CC(=O)OC)C(=O)CF)NC(=O)OCC3=CC=CC=C3	Active	Non-active	Active	Active	Active	Active
45480603	CC1(C[C@@H]1C(=O)N/C(=C\CCCCSC[C@@H](C(=O)[O-])N)/C(=O)O)C	Active	Non-active	Active	Active	Non-active	Active
44317861	CC[C@@H]1[C@@]([C@@H]([C@H](N(C[C@@H](C[C@@]([C@@H]([C@H]([C@@H]([C@H](C(=O)O1)C)O[C@H]2C[C@@]([C@H]([C@@H](O2)C)O)(C)OC)C)OC3[C@@H]([C@H](C[C@H](O3)C)N(C)C)O)(C)O)C)C)C)O)(C)O	Active	Non-active	Active	Active	Non-active	Active
25322992	C[C@H]1[C@@H](C(=O)N1S(=O)(=O)[O-])NC(=O)/C(=N\OC(C)(C)C(=O)[O-])/C2=CSC(=N2)N	Active	Non-active	Active	Active	Non-active	Active
25271618	CC1([C@@H](N2[C@H](S1)[C@@H](C2=O)NC(=O)C(C3=CC=CC=C3)S(=O)(=O)[O-])C(=O)[O-])C	Active	Non-active	Active	Active	Non-active	Active
23835497	C[C@@H]1C/C=C/C=C/C=C/C=C/C(C[C@H]2[C@@H]([C@H](C[C@](O2)(C[C@H](C[C@@H]3[C@H](O3)/C=C/C(=O)O1)O)O)O)C(=O)O)O[C@H]4C(C([C@@H](C(O4)C)O)N)O	Active	Non-active	Active	Active	Non-active	Active
24867525	C1C(C(C(C(C1N)OC2C(C(C(C(O2)CO)O)O)N)O[C@@H]3[C@H]([C@H]([C@H](O3)CO)OC4C(C(C(C(O4)CN)O)O)N)O)O)N	Active	Non-active	Active	Active	Non-active	Active
23704143	CCOC1=C(C(=O)N[C@H]2[C@H]3SC(C)(C)[C@@H](N3C2=O)C(O)=O)C2=CC=CC=C2C=C1	Active	Non-active	Active	Active	Non-active	Active
23687231	CC1(C)S[C@@H]2[C@H](NC(=O)COC3=CC=CC=C3)C(=O)N2[C@H]1C(O)=O	Active	Non-active	Active	Active	Non-active	Active
23675743	CC1=C(C(=O)N[C@H]2[C@H]3SC(C)(C)[C@@H](N3C2=O)C(O)=O)C(=NO1)C1=CC=CC=C1Cl	Active	Non-active	Active	Active	Non-active	Active
23675322	CC1=NN=C(SCC2=C(N3[C@H](SC2)[C@H](NC(=O)CN2C=NN=N2)C3=O)C(O)=O)S1	Active	Non-active	Active	Active	Non-active	Active
23670318	CO\N=C(/C(=O)N[C@H]1[C@H]2SCC(COC(N)=O)=C(N2C1=O)C(O)=O)C1=CC=CO1	Active	Non-active	Active	Active	Non-active	Active
23667631	CC1=C(C(=O)N[C@H]2[C@H]3SC(C)(C)[C@@H](N3C2=O)C(O)=O)C(=NO1)C1=CC=CC=C1	Active	Non-active	Active	Active	Non-active	Active
23666711	CO[C@]1(NC(=O)CSCC#N)[C@H]2SCC(CSC3=NN=NN3C)=C(N2C1=O)C(O)=O	Active	Non-active	Active	Active	Non-active	Active
23663979	CC1(C)S[C@@H]2[C@H](NC(=O)[C@H](N)C3=CC=CC=C3)C(=O)N2[C@H]1C(O)=O	Active	Non-active	Active	Active	Non-active	Active
18517259	CC1=NN=C(S1)SCC2=C(N3C(C(C3=O)NC(=O)CN4C=NN=N4)SC2)C(=O)O	Active	Non-active	Active	Active	Non-active	Active
15953908	C[C@@H]1[C@H]([C@@H](CC(O1)O[C@H]2[C@@H](CC3=C(C2=O)C(=C4C(=C3)C=C(C(=C4O)C)OC5C[C@@H]([C@@H]([C@@H](O5)C)OC(=O)C)OC6C[C@@H]([C@@H]([C@@H](O6)C)OC)O)O)[C@H](C(=O)[C@H]([C@H](C)O)O)OC)OC7C[C@@H]([C@H]([C@@H](O7)C)O)OC8C[C@]([C@H]([C@@H](O8)C)OC(=O)C)(C)O)O	Active	Non-active	Active	Active	Non-active	Active
12306674	CC1=C(C2=C(C=C1)C(=O)N3C=C(C[C@H]3[C@H](N2)O)/C=C/C(=O)N)O	Active	Non-active	Active	Active	Non-active	Active
11969952	CCC1[C@@]([C@@H]([C@H](C(=O)C(C[C@@](C(C(C([C@H](C(=O)O1)C)OC2CC(C(C(O2)C)O)(C)OC)C)OC3C(C(CC(O3)C)N(C)C)O)(C)OC)C)C)O)(C)O	Active	Non-active	Active	Active	Non-active	Active
11953887	C[C@@H]1[C@H]([C@@H]([C@H]([C@@H](O1)O[C@@H]2[C@H](O[C@H]([C@@H]([C@H]2O)NC(=O)C)O[C@@H]3[C@H]([C@]([C@H](O[C@@H]3OP(=O)(O)OC[C@H](C(=O)O)OC/C=C(\C)/CC/C=C/C(C)(C)CCC(=C)C/C=C(\C)/CCC=C(C)C)C(=O)O)(C)O)OC(=O)N)CO[C@H]4[C@@H]([C@H]([C@@H]([C@H](O4)CO)O)O)O)NC(=O)C)O)O[C@H]5[C@@H]([C@H]([C@H]([C@H](O5)C(=O)NC6=C(CCC6=O)O)O)O)O	Active	Non-active	Active	Non-active	Active	Active
11870577	C[C@H]1CCC/C=C/[C@H]2C[C@@H](C[C@H]2[C@@H](/C=C/C(=O)O1)O)O	Active	Non-active	Active	Active	Non-active	Non-active
16218979	CCCCCCC1[C@H]([C@@H](OC(=O)[C@H]([C@H](OC1=O)C)NC(=O)C2=C(C(=CC=C2)NC=O)O)C)OC(=O)CC(C)C	Active	Non-active	Active	Active	Non-active	Active
16217526	C[C@H]1C(=O)N[C@H](C(=O)O[C@@H](C(=O)N[C@@H](C(=O)O[C@H](C(=O)N[C@H](C(=O)O[C@@H](C(=O)N[C@@H](C(=O)O[C@H](C(=O)N[C@H](C(=O)O[C@@H](C(=O)N[C@H](C(=O)O1)C(C)C)C(C)C)C(C)C)C)C(C)C)C(C)C)C(C)C)C)C(C)C)C(C)C)C(C)C	Active	Non-active	Active	Active	Non-active	Active
16132315	CCCCC/C=C/CCC(=O)NC1C(C(C(OC1OC2=C3C=C4C=C2OC5=C(C=C(C=C5)C(C6C(=O)NC(C7=CC(=CC(=C7C8=C(C=CC(=C8)C(C(=O)N6)NC(=O)C4NC(=O)C9C1=CC(=C(C(=C1)O)C)OC1=C(C=CC(=C1)C(C(=O)NC(C(C1=CC(=C(O3)C=C1)Cl)O)C(=O)N9)N)O)O)OC1C(C(C(C(O1)CO)O)O)O)O)C(=O)OC)OC1C(C(C(C(O1)CO)O)O)NC(=O)C)Cl)CO)O)O	Active	Non-active	Active	Active	Non-active	Non-active
16129629	CCCCCCCCCC(=O)N[C@@H](CC1=CNC2=CC=CC=C21)C(=O)N[C@@H](CC(=O)N)C(=O)N[C@@H](CC(=O)O)C(=O)NC3C(OC(=O)[C@@H](NC(=O)[C@@H](NC(=O)[C@H](NC(=O)CNC(=O)[C@@H](NC(=O)[C@H](NC(=O)[C@@H](NC(=O)[C@@H](NC(=O)CNC3=O)CCCN)CC(=O)O)C)CC(=O)O)CO)C(C)CC(=O)O)CC(=O)C4=CC=CC=C4N)C	Active	Non-active	Active	Active	Non-active	Active
12873459	CC[C@@H]1[C@H](/C=C(/C=C/C(=O)[C@@H](C[C@@H]([C@@H]([C@H]([C@@H](CC(=O)O1)O)C)O[C@H]2[C@@H]([C@H]([C@@H]([C@H](O2)C)O[C@H]3C[C@@]([C@H]([C@@H](O3)C)O)(C)O)N(C)C)O)CC=O)C)\C)COC4[C@@H]([C@@H]([C@@H]([C@H](O4)C)O)OC)OC	Active	Non-active	Active	Active	Non-active	Active
9907260	C1C(=C(N2[C@H](S1)[C@@H](C2=O)NC(=O)[C@H](C3=CC=CC=C3)N)C(=O)O)Cl	Active	Non-active	Active	Active	Non-active	Active
9570985	CO\N=C(/C(=O)N[C@H]1[C@H]2SCC(CSC3=NC(=O)C(O)=NN3C)=C(N2C1=O)C(O)=O)C1=CSC(N)=N1	Active	Non-active	Active	Active	Non-active	Active
7067772	CN(C(=O)N[C@@H]1[C@H]([C@@H]([C@H](O[C@H]1O)CO)O)O)N=O	Active	Non-active	Active	Active	Non-active	Active
6918327	C(C/C(=C\[N+]#N)/[O-])[C@@H](C(=O)O)N	Active	Non-active	Active	Active	Non-active	Active
6713976	C1=NC2=C(C(=N1)N)N=CN2[C@H]3C([C@H]([C@H](O3)CO)O)O	Active	Non-active	Active	Non-active	Non-active	Active
6713914	C[C@@H]1CC2(CO2)C(=O)[C@H](C([C@@H]([C@@H](OC(=O)[C@@H]([C@@H]([C@@H]([C@@H]1OC3C(C(CC(O3)C)N(C)C)OC(=O)C)C)OC4CC(C(C(O4)C)OC(=O)C)OC)C)C)C)OC(=O)C)C	Active	Non-active	Active	Active	Non-active	Active
6260974	CCC1C(/C=C(/C=C/C(=O)C(CC(C(C(C(CC(=O)O1)O)C)OC2C(C(C(C(O2)C)OC3CC(C(C(O3)C)O)(C)O)N(C)C)O)CC=O)C)\C)COC4C(C(C(C(O4)C)O)OC)OC	Active	Non-active	Active	Active	Non-active	Active
6433556	C[C@@H](C/C=C/CC/C=C/C=C\C[C@H](/C(=C\C=C(/C)\C(=O)O)/C)OC)/C=C/C(=C\C(=O)O)/CC(=O)O	Active	Non-active	Active	Active	Non-active	Active
6427042	C[C@H]1C(C([C@@H](O1)OC2[C@H](C(C([C@@H](C2O)O)N=C(N)N)O)N=C(N)N)O[C@H]3C(C([C@H](C(O3)CO)O)O)NC)(CO)O	Active	Non-active	Active	Active	Non-active	Active
6426701	CC[C@@H]1[C@H](/C=C(/C=C/C(=O)[C@@H](C[C@@H]([C@@H]([C@H]([C@@H](CC(=O)O1)O)C)OC2C(C(C(C(O2)C)OC3CC(C(C(O3)C)O)(C)O)N(C)C)O)CC=O)C)\C)COC4C(C(C(C(O4)C)O)OC)OC	Active	Non-active	Active	Active	Active	Active
6426662	CC[C@@H]1[C@@]([C@@H]([C@H](C(=O)[C@@H](C[C@@]([C@@H]([C@H]([C@@H]([C@H](C(=O)O1)C)OC2CC(C(C(O2)C)O)(C)OC)C)O[C@H]3C([C@@H](CC(O3)C)N(C)C)O)(C)OC)C)C)O)(C)O	Active	Non-active	Active	Active	Non-active	Active
6420074	CN(C(=O)N[C@H]1[C@@H]([C@@H](C(OC1O)CO)O)O)N=O	Active	Non-active	Active	Active	Non-active	Active
6420060	C1C(C(C(C(C1N)OC2C(C(C(C(O2)CO)O)O)N)OC3[C@H]([C@H]([C@H](O3)CO)OC4C(C(C(C(O4)CN)O)O)N)O)O)N	Active	Non-active	Active	Active	Non-active	Active
6419912	CN[C@@H]1[C@H](O[C@H]2[C@H](O[C@@H]3[C@@H](O)[C@H](O)[C@@H](N=C(N)N)[C@H](O)[C@H]3N=C(N)N)O[C@@H](C)[C@]2(O)CO)O[C@@H](CO)[C@H](O)[C@H]1O	Active	Non-active	Active	Active	Non-active	Active
6419880	C1C([C@H]([C@H](C(C1N)OC2[C@H]([C@H](C(C(O2)CN)O)O)N)OC3[C@H]([C@@H]([C@H](O3)CO)O)O)O)NC(=O)C(CCN)O	Active	Non-active	Active	Active	Non-active	Active
6334775	C1C(C(C(C(C1NC(=O)[C@H](CCN)O)OC2C(C(C(C(O2)CO)O)N)O)O)OC3C(C(C(C(O3)CN)O)O)O)N	Active	Non-active	Active	Active	Non-active	Active
6321411	C=CC1=C(N2[C@@H]([C@@H](C2=O)NC(=O)/C(=N/OCC(=O)O)/C3=CSC(=N3)N)SC1)C(=O)O	Active	Non-active	Active	Active	Non-active	Active
5385314	CC(=C)C(=O)/C(=C\C(=O)O)/OC	Active	Non-active	Active	Active	Non-active	Active
5354042	CC1/C=C\C(=O)NC/C=C\C(=C/C(CC(=O)CC2=NC(=CO2)C(=O)N3CCC=C3C(=O)OC1C(C)C)O)\C	Active	Non-active	Active	Active	Non-active	Active
5311050	CC[C@@H]1[C@@]([C@@H]([C@H](C(=O)[C@@H](C[C@@]([C@@H]([C@H]([C@@H]([C@H](C(=O)O1)C)OC2C[C@@]([C@H]([C@@H](O2)C)O)(C)OC)C)OC3[C@@H]([C@H](C[C@H](O3)C)N(C)C)O)(C)OC)C)C)O)(C)O	Active	Non-active	Active	Active	Active	Non-active
5311005	CC1=C(C2=C(C=C1)C(=O)N3C=C(CC3C(N2)O)/C=C/C(=O)N)O	Active	Non-active	Active	Active	Non-active	Active
3032902	C1[C@@H](N=C(NC1[C@@H]2C(=O)NCC(C(=O)NC(C(=O)NC(C(=O)N/C(=C\NC(=O)N)/C(=O)N2)CO)CO)NC(=O)CC(CCCN)N)N)O	Active	Non-active	Active	Active	Non-active	Active
3532632	CN1C2=CC=CC=C2N=C2C(=O)C=CC=C12	Active	Non-active	Active	Non-active	Non-active	Non-active
62403	C1[C@H]([C@@H]([C@H]([C@@H]([C@H]1N)O[C@@H]2[C@@H]([C@H]([C@@H]([C@H](O2)CN)O)O)N)O[C@H]3[C@@H]([C@@H]([C@H](O3)CO)OC4[C@@H]([C@H]([C@@H]([C@@H](O4)CN)O)O)N)O)O)N	Active	Non-active	Active	Active	Non-active	Active
55185	CC[C@@H]1[C@@]([C@@H]([C@H](N(C[C@@H](C[C@@]([C@@H](C([C@@H]([C@H](C(=O)O1)C)O[C@H]2C[C@@]([C@H]([C@@H](O2)C)O)(C)OC)C)O[C@H]3[C@@H]([C@H](C[C@H](O3)C)N(C)C)O)(C)O)C)C)C)O)(C)O	Active	Non-active	Active	Active	Non-active	Active
50614	CN1C(=NN=N1)SCC2=C(N3C([C@@](C3=O)(NC(=O)C4SC(=C(C(=O)N)C(=O)O)S4)OC)SC2)C(=O)O	Active	Non-active	Active	Active	Non-active	Active
41859	CCN[C@@H]1C[C@@H]([C@H]([C@@H]([C@H]1O[C@@H]2[C@@H]([C@H]([C@@](CO2)(C)O)NC)O)O)OC3C(CC=C(O3)CN)N)N	Active	Non-active	Active	Active	Non-active	Active
39862	C1[C@@H]([C@H]([C@@H]([C@H]([C@@H]1NC(=O)C(CCN)O)O)O[C@H]2[C@@H](C([C@H](O2)CO)O)O)O[C@@H]3[C@@H]([C@H]([C@@H]([C@H](O3)CN)O)O)N)N	Active	Non-active	Active	Active	Non-active	Active
39031	CC1([C@@H](N2[C@H](S1)[C@@H](C2=O)NC(=O)C(C3=CC=CC=C3)S(=O)(=O)O)C(=O)O)C	Active	Non-active	Active	Active	Active	Active
32874	CC1C(C(CC(O1)O[C@H]2C[C@@](CC3=C(C4=C(C(=C23)O)C(=O)C5=C(C4=O)C=CC=C5OC)O)(C(=O)CO)O)N)O	Active	Non-active	Active	Active	Non-active	Active
32036	CC1=C(C(=CC=C1)O)C(=O)OCC2([C@H](C([C@](C2(C)O)([C@H](C)O)NC(=O)N(C)C)N)NC3=CC=CC(=C3)C(=O)C)O	Active	Non-active	Active	Active	Non-active	Active
28032	C1=C(C(=O)NC1=O)[C@H]2[C@@H]([C@@H]([C@H](O2)CO)O)O	Active	Non-active	Active	Active	Non-active	Active
27200	CS(=O)(=O)C1=CC=C(C=C1)[C@H]([C@@H](CO)NC(=O)C(Cl)Cl)O	Active	Non-active	Active	Active	Non-active	Active
21319	CC1=C(C(=NO1)C2=C(C=CC=C2Cl)F)C(=O)N[C@H]3[C@@H]4N(C3=O)[C@H](C(S4)(C)C)C(=O)O	Active	Non-active	Active	Active	Non-active	Active
20297	COC1C(OC(N)=O)C(O)C(OC2=C(C)C3=C(C=C2)C(=O)C(NC(=O)C2=CC(CC=C(C)C)=C(O)C=C2)=C(O)O3)OC1(C)C	Active	Non-active	Active	Active	Non-active	Active
14957	CCCCCC[C@@H]1[C@H]([C@@H](OC(=O)[C@H]([C@H](OC1=O)C)NC(=O)C2=C(C(=CC=C2)NC=O)O)C)OC(=O)CC(C)C	Active	Non-active	Active	Active	Non-active	Active
14951	C1[C@@H]([C@H]([C@@H]([C@H]([C@@H]1N)O[C@@H]2[C@@H]([C@H]([C@@H]([C@H](O2)CO)O)O)N)O[C@H]3[C@@H]([C@@H]([C@H](O3)CO)OC4[C@@H]([C@H]([C@@H]([C@H](O4)CN)O)O)N)O)O)N	Active	Non-active	Active	Active	Non-active	Active
9063	CCC[C@@H]1C[C@H](N(C1)C)C(=O)N[C@H](C2[C@@H]([C@@H]([C@H]([C@H](O2)SC)O)O)O)C(C)O	Active	Non-active	Active	Active	Non-active	Active
6234	C1[C@H](C(=O)NO1)N	Active	Non-active	Active	Active	Non-active	Active
5433	CS(=O)(=O)C1=CC=C(C=C1)C(C(CO)NC(=O)C(Cl)Cl)O	Active	Non-active	Active	Non-active	Non-active	Active
5300	CN(C(=O)NC1C(C(C(OC1O)CO)O)O)N=O	Active	Non-active	Active	Non-active	Non-active	Active
4587	CC1CC(C(C(O1)OC2C(CC3(CO3)C(=O)C(C(C(C(OC(=O)C(C(C2C)OC4CC(C(C(O4)C)O)OC)C)C)C)O)C)C)O)N(C)C	Active	Non-active	Active	Active	Non-active	Active
4460	CCNC1CC(C(C(C1OC2C(C(C(CO2)(C)O)NC)O)O)OC3C(CC=C(O3)CN)N)N	Active	Non-active	Active	Non-active	Non-active	Active
2609	C1C(=C(N2C(S1)C(C2=O)NC(=O)C(C3=CC=CC=C3)N)C(=O)O)Cl	Active	Non-active	Active	Active	Non-active	Active
2485	C1C(C(C(C(C1NC(=O)C(CCN)O)O)OC2C(C(C(O2)CO)O)O)OC3C(C(C(C(O3)CN)O)O)N)N	Active	Non-active	Active	Non-active	Active	Non-active
1599	CN(C)C1=NC=NC2=C1N=CN2C3C(C(C(O3)CO)N)O	Active	Non-active	Active	Active	Active	Active
320	C1C(C2=C(NC=N1)N(C=N2)C3C(C(C(O3)CO)O)O)O	Active	Non-active	Active	Active	Non-active	Active
5282473	C[C@@H]1[C@@H]([C@@H]([C@H]([C@H](O1)O[C@H]2[C@@H](C=C3C2CC#C[C@@H]4[C@@](O4)(C#C3)[C@H]5COC(=O)O5)OC(=O)C6=C(C=CC7=C(C=C(C=C76)OC)C)O)NC)O)O	Active	Non-active	Non-active	Active	Non-active	Non-active
676166	C1=NC(=S)C2=C(N1)N(C=N2)[C@H]3[C@@H]([C@@H]([C@H](O3)CO)O)O	Active	Non-active	Non-active	Active	Active	Non-active
633097	CC1(OC2CC3C4CCC5=CC(=O)C=CC5(C4(C(CC3(C2(O1)C(=O)CO)C)O)F)C)C	Active	Non-active	Non-active	Active	Non-active	Non-active
550898	CCC(C)C1C(CC(=O)OC(C(=O)C(C(=O)NC(C(=O)N2CCCC2C(=O)N(C(C(=O)OC(C(C(=O)N1)NC(=O)C(CC(C)C)N(C)C(=O)C3CCCN3C(=O)C(C)O)C)CC4=CC=C(C=C4)OC)C)CC(C)C)C)C(C)C)O	Active	Non-active	Non-active	Non-active	Active	Non-active
457825	CN1CCC2=CC(=C3C=C2[C@@H]1CC4=CC=C(C=C4)OC5=C(C=CC(=C5)C[C@@H]6C7=C(O3)C(=C(C=C7CCN6C)OC)OC)OC)OC	Active	Non-active	Non-active	Active	Non-active	Non-active
448457	CCCCC[C@@H](/C=C/[C@@H]1[C@H]([C@H](CC1=O)O)C/C=C\CCCC(=O)O)O	Active	Non-active	Non-active	Active	Non-active	Non-active
445027	C[C@H]1[C@H](NC(=O)N1)CCCCCC(=O)O	Active	Non-active	Non-active	Active	Non-active	Non-active
441794	CC[C@@](C)(C(=O)O[C@@H]1[C@H]2[C@H]([C@H]([C@]3([C@H]4[C@@]2(CO3)[C@@H](C[C@@H]5[C@@]4([C@@H]([C@H](C=C5C)O)O)C)OC1=O)O)O)C)O	Active	Non-active	Non-active	Active	Non-active	Non-active
189821	CC1=N[C@@]2([C@H](O1)C[C@@H]3[C@@]2(C[C@@H]([C@H]4[C@H]3CCC5=CC(=O)C=C[C@]45C)O)C)C(=O)COC(=O)C	Active	Non-active	Non-active	Active	Non-active	Non-active
167928	C[C@@H]1[C@@H]([C@@H]([C@H]([C@@H](O1)O[C@H]2CC[C@]3([C@H]([C@]2(C)CO)CC[C@@]4([C@@H]3C=C[C@@]56[C@]4(C[C@@H]([C@@]7([C@H]5CC(CC7)(C)C)CO6)O)C)C)C)O)O[C@H]8[C@@H]([C@H]([C@@H]([C@H](O8)CO)O)O)O)O	Active	Non-active	Non-active	Active	Active	Non-active
154940	CCCC1C(=O)C(C(=O)NC(C(=O)N2CCCC2C(=O)N(C(C(=O)OC(C(C(=O)NC(C(CC(=O)O1)O)C(C)CC)NC(=O)C(CC(C)C)N(C)C(=O)C(C)O)C)CC3=CC=C(C=C3)OC)C)CC(C)C)C	Active	Non-active	Non-active	Active	Active	Non-active
149025	CN1C=C(C=C1C(=O)NCCC(=O)N)NC(=O)C2=CC(=CN2C)N=C(CN=C(N)N)N	Active	Non-active	Non-active	Active	Non-active	Active
122651	CC[C@H](C)[C@@H]1[C@H](CC(=O)O[C@H](C(=O)[C@@H](C(=O)N[C@H](C(=O)N2CCC[C@H]2C(=O)N([C@H](C(=O)O[C@@H]([C@@H](C(=O)N1)NC(=O)[C@@H](CC(C)C)N(C)C(=O)[C@@H]3CCCN3C(=O)[C@H](C)O)C)CC4=CC=C(C=C4)OC)C)CC(C)C)C)C(C)C)O	Active	Non-active	Non-active	Active	Active	Non-active
121957	CCCC1(CCC2(CC1)CCN(C2)CCCN(C)C)CCC	Active	Non-active	Non-active	Active	Active	Non-active
114844	CCCC[C@@H](C(=O)N[C@@H](CCCC)C(=O)OC)N	Active	Non-active	Non-active	Active	Non-active	Non-active
114682	C1=CN(C(=O)N=C1N)C2[C@H]([C@@H]([C@H](O2)CO)O)O	Active	Non-active	Non-active	Non-active	Active	Non-active
107985	CC(C)[C@@]12[C@@H](O1)[C@H]3[C@@]4(O3)[C@]5(CCC6=C([C@@H]5C[C@H]7[C@]4([C@@H]2O)O7)COC6=O)C	Active	Non-active	Non-active	Active	Active	Non-active
107969	CCCCCCCCC1=CC=C(C=C1)CCC(CO)(CO)N	Active	Non-active	Non-active	Active	Non-active	Non-active
105117	CC1=CCCC2=C1C=CC3=C2C(=O)C(=O)C4=C3OC=C4C	Active	Non-active	Non-active	Active	Non-active	Non-active
104934	C[C@]12CC=C3[C@H]([C@@H]1CC[C@@H]2C(=O)CN4CCN(CC4)C5=NC(=NC(=C5)N6CCCC6)N7CCCC7)CCC8=CC(=O)C=C[C@@]83C	Active	Non-active	Non-active	Active	Non-active	Non-active
91271	C(CCCN=C(N)N)CCC(=O)N[C@H](C(=O)NCCCCNCCCN)O	Active	Non-active	Non-active	Non-active	Active	Non-active
83273	CNC(=O)N(C)N=O	Active	Non-active	Non-active	Active	Non-active	Non-active
68647	CC1=NC=CN1CC2CCC3=C(C2=O)C4=CC=CC=C4N3C	Active	Non-active	Non-active	Active	Non-active	Non-active
54669722	C[C@@H]1C([C@@H]([C@@H](O1)N2C=C(C(=O)NC2=O)F)O)O	Active	Non-active	Non-active	Active	Non-active	Non-active
54608520	C[C@@H]1CC[C@H]2C[C@@H](C(=C/C=C/C=C/[C@H](C[C@H](C(=O)[C@@H]([C@@H](C(=C[C@H](C(=O)C[C@H](OC(=O)[C@@H]3CCCCN3C(=O)C(=O)[C@@]1(O2)O)[C@H](C)C[C@@H]4CC[C@H]([C@@H](C4)OC)OCCO)C)C)O)OC)C)C)C)OC	Active	Non-active	Non-active	Non-active	Non-active	Non-active
53249654	C\C(=C(\C)C(O)=O)C(O)=O	Active	Non-active	Non-active	Active	Non-active	Non-active
46936934	CCC(CC)(/C=C/C=C/[C@@H](C)[C@H]1CC[C@H]\2[C@]1(CCC/C2=C/C=C\3/C[C@@H](C[C@H](C3=C)O)O)C)O	Active	Non-active	Non-active	Active	Non-active	Non-active
44629858	C[C@@H]1[C@H](C([C@@H](O1)N2C=C(C(=O)NC2=O)F)O)O	Active	Non-active	Non-active	Active	Non-active	Non-active
46173839	CCC(C)[C@@H]1[C@H](CC(=O)O[C@H](C(=O)[C@@H](C(=O)N[C@H](C(=O)N2CCC[C@H]2C(=O)N([C@H](C(=O)O[C@@H]([C@@H](C(=O)N1)NC(=O)[C@@H](CC(C)C)N(C)C(=O)[C@@H]3CCCN3C(=O)[C@H](C)O)C)CC4=CC=C(C=C4)OC)C)CC(C)C)C)C(C)C)O	Active	Non-active	Non-active	Active	Non-active	Non-active
45280821	CCC(C)C1C(CC(=O)O[C@H](C(=O)[C@H](C(=O)NC(C(=O)N2CCCC2C(=O)N(C(C(=O)OC(C(C(=O)N1)NC(=O)C(CC(C)C)N(C)C(=O)C3CCCN3C(=O)C(C)O)C)CC4=CC=C(C=C4)OC)C)CC(C)C)C)C(C)C)O	Active	Non-active	Non-active	Active	Non-active	Non-active
44202892	C[C@@H]1[C@@H]([C@@H]([C@H]([C@@H](O1)O[C@H]2CC[C@]3(C([C@]2(C)CO)CC[C@@]4(C3C=C[C@@]56[C@]4(C[C@@H]([C@@]7([C@H]5CC(CC7)(C)C)CO6)O)C)C)C)O)O[C@H]8[C@@H]([C@H]([C@@H]([C@H](O8)CO)O)O)O)O	Active	Non-active	Non-active	Active	Non-active	Active
44201989	CC[C@H](C)[C@H]1C(=O)N[C@H](C(=O)N[C@H](C(=O)N[C@H](C(=O)N2CCC[C@H]2C(=O)N3CCC[C@H]3C(=O)N[C@H](C(=O)N[C@H](C(=O)N[C@@H](C(=O)N1)CC(C)C)CC4=CC=CC=C4)CC5=CC=CC=C5)C(C)C)CC(C)C)[C@@H](C)CC	Active	Non-active	Non-active	Active	Active	Active
25244917	CC1NC(=O)NC1CCCCCC(O)=O	Active	Non-active	Non-active	Active	Non-active	Active
24838593	C(CCCN=C(N)N)CCC(=O)NC(C(=O)NCCCCNCCCN)O	Active	Non-active	Non-active	Active	Non-active	Active
23724849	C[C@@H]1CCC2C[C@@H](/C(=C/C=C/C=C/[C@H](C[C@H](C(=O)[C@@H]([C@@H](/C(=C/[C@H](C(=O)C[C@H](OC(=O)[C@@H]3CCCCN3C(=O)C(=O)[C@@]1(O2)O)[C@H](C)C[C@@H]4CC[C@H]([C@@H](C4)OC)OCCO)C)/C)O)OC)C)C)/C)OC	Active	Non-active	Non-active	Non-active	Non-active	Non-active
23691748	CC(C(=O)NCC(=O)[O-])SC(=O)C1=CC=CS1	Active	Non-active	Non-active	Non-active	Active	Non-active
23663399	ClC1=C2OC3=C(C=CC=N3)C(=O)C2=CC(=C1)C1=NN=NN1	Active	Non-active	Non-active	Active	Non-active	Non-active
17753757	CC[C@@H]1/C=C(\C[C@@H](C[C@@H]([C@@H]2[C@H](C[C@H]([C@@](O2)(C(=O)C(=O)N3CCCC[C@H]3C(=O)O[C@@H]([C@H]([C@H](CC1=O)O)C)/C(=C/[C@@H]4CC[C@@H]([C@@H](C4)OC)Cl)/C)O)C)OC)OC)C)/C	Active	Non-active	Non-active	Active	Non-active	Non-active
16220015	CC(C)[C@@]12[C@@H](O1)[C@H]3[C@@]4(O3)[C@]5(CCC6=C(C5C[C@H]7[C@]4([C@@H]2O)O7)COC6=O)C	Active	Non-active	Non-active	Active	Non-active	Non-active
13179970	C1=CC2=C(N=C1)OC3=C(C=C(C=C3C2=O)C4=NN=N[N-]4)Cl	Active	Non-active	Non-active	Active	Active	Non-active
9966640	CCCCC/C=C\CC(C(CCCCCCCC(=O)O)O)O	Active	Non-active	Non-active	Non-active	Active	Non-active
9940643	C[C@@H]1C[C@@H]([C@@H]2[C@H](C[C@H]([C@@](O2)(C(=O)C(=O)N3CCCC[C@H]3C(=O)O[C@@H]([C@@H]([C@H](CC(=O)[C@@H](/C=C(/C1)\C)CC=C)O)C)/C(=C/[C@@H]4CCC([C@@H](C4)OC)O)/C)O)C)OC)OC	Active	Non-active	Non-active	Active	Non-active	Non-active
9549174	CC[C@@H]1C=C(C[C@@H](C[C@@H]([C@@H]2[C@H](C[C@H]([C@@](O2)(C(=O)C(=O)N3CCCC[C@H]3C(=O)O[C@@H]([C@@H]([C@H](CC1=O)O)C)/C(=C/[C@@H]4CC[C@H]([C@@H](C4)OC)O)/C)O)C)OC)OC)C)C	Active	Non-active	Non-active	Active	Non-active	Non-active
6917688	C[C@]12CC[C@H]3[C@H]([C@@H]1CC[C@@H]2OC(=O)COC(=O)CCCC4=CC=C(C=C4)N(CCCl)CCCl)CCC5=C3C=CC(=C5)OC(=O)C6=CC=CC=C6	Active	Non-active	Non-active	Active	Non-active	Non-active
5836499	CC1CCCC(/C=C\C(=O)OC23C(/C=C/C1)C(C(=C)C(C2C(NC3=O)CC4=CC=CC=C4)C)O)O	Active	Non-active	Non-active	Active	Non-active	Non-active
6507974	CCC1/C=C(/CC(CC(C2C(CC(C(O2)(C(=O)C(=O)N3CCCCC3C(=O)OC(C(C(CC1=O)O)C)/C(=C/C4CCC(C(C4)OC)O)/C)O)C)OC)OC)C)\C	Active	Non-active	Non-active	Active	Non-active	Non-active
6473773	CCCCC[C@@H](/C=C/C1[C@H]([C@H](CC1=O)O)C/C=C\CCCC(=O)O)O	Active	Non-active	Non-active	Active	Active	Non-active
6441022	CC1=C(C(=C(C2=C1COC2=O)O)C/C=C(\C)/CCC(=O)OCCN3CCOCC3)OC	Active	Non-active	Non-active	Active	Active	Non-active
6438379	CCCCCCCCCCCC1=CC=C(N1)/C=C\2/C(=C/C(=C/3\C=CC=N3)/N2)OC	Active	Non-active	Non-active	Active	Active	Non-active
6438358	COC1=CC=C(C=C1)/C=C/CCCCOC2=C(C(=CC=C2)OCCCCC(=O)O)CCC(=O)O	Active	Non-active	Non-active	Active	Active	Non-active
6436007	C[C@@H]1C[C@@H]([C@@H]2[C@H](C[C@H]([C@@](O2)(C(=O)C(=O)N3CCCC[C@H]3C(=O)O[C@@H]([C@@H]([C@H](CC(=O)[C@@H](/C=C(/C1)\C)CC=C)O)C)/C(=C/C4CC[C@H]([C@@H](C4)OC)O)/C)O)C)OC)OC	Active	Non-active	Non-active	Active	Non-active	Non-active
6435399	CCCCC(C)(C/C=C/[C@H]1[C@@H](CC(=O)[C@@H]1CC/C=C/CCC(=O)OC)O)O	Active	Non-active	Non-active	Non-active	Active	Non-active
6426916	C[C@@H]1C[C@@H](C2C(C[C@H](C/C(=C/C(C(=O)C[C@@H](C(C(OC(=O)[C@@H]3CCCCN3C(=O)C(=O)[C@@]1(O2)O)/C(=C/[C@@H]4CCC([C@@H](C4)OC)O)/C)C)O)CC=C)/C)C)OC)OC	Active	Non-active	Non-active	Active	Non-active	Non-active
6364615	C[C@@H]1CCC[C@@H](/C=C/C(=O)O[C@]23[C@@H](/C=C/C1)[C@@H](C(=C)[C@H]([C@H]2[C@@H](NC3=O)CC4=CC=CC=C4)C)O)O	Active	Non-active	Non-active	Active	Non-active	Non-active
5458707	CC[C@@H](C)[C@H]1[C@@H](CC(=O)O[C@H](C(=O)[C@H](C(=O)NC(C(=O)N2CCCC2C(=O)N(C(C(=O)O[C@H](C(C(=O)N1)NC(=O)C(CC(C)C)N(C)C(=O)C3CCCN3C(=O)[C@H](C)O)C)CC4=CC=C(C=C4)OC)C)CC(C)C)C)C(C)C)O	Active	Non-active	Non-active	Active	Non-active	Non-active
5288670	CCC(CC)(CCCO[C@H](C)[C@H]1CC[C@@H]\2[C@@]1(CCC/C2=C\C=C/3\C[C@H](C[C@@H](C3=C)O)O)C)O	Active	Non-active	Non-active	Active	Non-active	Non-active
2861016	C1=NC(=S)C2=C(N1)N(C=N2)C3C(C(C(O3)CO)O)O	Active	Non-active	Non-active	Active	Non-active	Non-active
65702	C1CN(P(=O)(OC1)N(CCCl)CCCl)CCCl	Active	Non-active	Non-active	Non-active	Non-active	Non-active
64988	C1=NC2=C(N1CCOCP(=O)(O)O)N=C(N=C2N)N	Active	Non-active	Non-active	Non-active	Non-active	Non-active
59757	CN(C(=O)CCC1=NN(C(=C1)C2=CC=C(C=C2)Cl)C3=CC=C(C=C3)OC)O	Active	Non-active	Non-active	Active	Active	Non-active
54343	C1=CC(=CC=C1CCNS(=O)(=O)C2=CC=C(C=C2)Cl)CC(=O)O	Active	Non-active	Non-active	Non-active	Active	Non-active
54120	CC(C(=O)NCC(=O)O)SC(=O)C1=CC=CS1	Active	Non-active	Non-active	Non-active	Non-active	Non-active
47462	OC(=O)C1=CC=CC=C1NC1=C(C=CC(Cl)=C1)C(O)=O	Active	Non-active	Non-active	Non-active	Active	Non-active
31789	C1C(O1)C(C(C2CO2)O)O	Active	Non-active	Non-active	Non-active	Non-active	Non-active
26105	COCC(CN1C=CN=C1[N+](=O)[O-])O	Active	Non-active	Non-active	Non-active	Active	Non-active
24772	C=CC1=CC=CC=[N+]1[O-]	Active	Non-active	Non-active	Non-active	Active	Non-active
20279	C1[C@@H]([C@H](O[C@H]1N2C=NC3=C2N=C(N=C3N)Cl)CO)O	Active	Non-active	Non-active	Active	Active	Non-active
18343	C[C@@H]1[C@H]([C@H]([C@@H](O1)N2C=C(C(=O)NC2=O)F)O)O	Active	Non-active	Non-active	Non-active	Non-active	Non-active
12251	COCC(=O)O	Active	Non-active	Non-active	Non-active	Active	Non-active
10341	C1C=CC(=O)O1	Active	Non-active	Non-active	Non-active	Active	Non-active
6730	C1=CC(=CC=C1C(C2=CC=C(C=C2)Cl)C(=O)O)Cl	Active	Non-active	Non-active	Non-active	Active	Non-active
6497	COS(=O)(=O)OC	Active	Non-active	Non-active	Non-active	Non-active	Non-active
6252	C1=CN(C(=O)N=C1N)[C@H]2[C@H]([C@@H]([C@H](O2)CO)O)O	Active	Non-active	Non-active	Active	Non-active	Non-active
6223	CN1C(=O)[C@]23CC4=CC=C[C@@H]([C@H]4N2C(=O)[C@]1(SS3)CO)O	Active	Non-active	Non-active	Active	Non-active	Non-active
5422	CN1CCC2=CC(=C3C=C2C1CC4=CC=C(C=C4)OC5=C(C=CC(=C5)CC6C7=C(O3)C(=C(C=C7CCN6C)OC)OC)OC)OC	Active	Non-active	Non-active	Active	Non-active	Non-active
5050	CC1=C(C2=C(C=C1)C3=C(C(=O)C=C(O3)C(=O)OCCC(C)C)C(=O)N2)C	Active	Non-active	Non-active	Active	Active	Non-active
4247	CN(C)C1=CC=CC2=C1C=CC=C2S(=O)(=O)NCCCCCN	Active	Non-active	Non-active	Non-active	Active	Non-active
3476	CCC1=C(CN(C1=O)C(=O)NCCC2=CC=C(C=C2)S(=O)(=O)NC(=O)NC3CCC(CC3)C)C	Active	Non-active	Non-active	Active	Non-active	Non-active
3368	C1=NC2=C(N1C3C(C(C(O3)COP(=O)(O)O)O)O)N=C(N=C2N)F	Active	Non-active	Non-active	Active	Active	Non-active
3159	CC1C(C(C(O1)N2C=C(C(=O)NC2=O)F)O)O	Active	Non-active	Non-active	Non-active	Non-active	Non-active
40	C1C(C(C(OC1O)CO)O)O	Non-active	Non-active	Non-active	Non-active	Non-active	Non-active
640	C1C(C(OC1N2C=CC(=O)NC2=O)CO)O	Non-active	Non-active	Non-active	Non-active	Active	Non-active
1207	CC12C3=CC=CC=C3CC(N1)C4=CC=CC=C24	Non-active	Non-active	Non-active	Non-active	Non-active	Non-active
1234	CC(C)C(CCCN(C)CCC1=CC(=C(C=C1)OC)OC)(C#N)C2=CC(=C(C(=C2)OC)OC)OC	Non-active	Non-active	Non-active	Active	Active	Non-active
1978	CCCC(=O)NC1=CC(=C(C=C1)OCC(CNC(C)C)O)C(=O)C	Non-active	Non-active	Non-active	Non-active	Active	Non-active
2005	CC(=O)NCCCCCC(=O)O	Non-active	Non-active	Non-active	Active	Active	Non-active
2206	CC1=CC(=O)N(N1C)C2=CC=CC=C2	Non-active	Non-active	Non-active	Non-active	Active	Non-active
2459	CC(C)(C(=O)NC(CS)C(=O)O)S	Non-active	Non-active	Non-active	Non-active	Active	Non-active
3043	C1CC(OC1CO)N2C=NC3=C2NC=NC3=O	Non-active	Non-active	Non-active	Non-active	Non-active	Non-active
3111	CC1=C(C(=O)N(N1C)C2=CC=CC=C2)N(C)CS(=O)(=O)O	Non-active	Non-active	Non-active	Non-active	Active	Non-active
3282	CCOC1=CC=CC=C1C(=O)N	Non-active	Non-active	Non-active	Non-active	Active	Non-active
3291	CCC1(CC(=O)NC1=O)C	Non-active	Non-active	Non-active	Non-active	Non-active	Non-active
3619	CC(=O)OCOC(C1=CC2=CC=CC=C2C=C1)P(=O)(OCOC(=O)C)OCOC(=O)C	Non-active	Non-active	Non-active	Active	Non-active	Non-active
3763	C(C(F)(F)F)(OC(F)F)Cl	Non-active	Non-active	Non-active	Non-active	Non-active	Non-active
3950	C1CCC(CC1)NC(=O)N(CCCl)N=O	Non-active	Non-active	Non-active	Non-active	Active	Non-active
3965	CC(C1=CC=C(C=C1)CC2CCCC2=O)C(=O)O	Non-active	Non-active	Non-active	Non-active	Active	Non-active
4034	CC1=CC(=CC=C1)CN2CCN(CC2)C(C3=CC=CC=C3)C4=CC=C(C=C4)Cl	Non-active	Non-active	Non-active	Active	Active	Non-active
4062	CC1=C(C(=CC=C1)C)NC(=O)C2CCCCN2C	Non-active	Non-active	Non-active	Non-active	Active	Non-active
4156	COS(=O)(=O)C	Non-active	Non-active	Non-active	Non-active	Non-active	Non-active
4192	CC1=NC=C2N1C3=C(C=C(C=C3)Cl)C(=NC2)C4=CC=CC=C4F	Non-active	Non-active	Non-active	Active	Active	Non-active
4450	CN1CCOC(C2=CC=CC=C2C1)C3=CC=CC=C3	Non-active	Non-active	Non-active	Non-active	Active	Non-active
4737	CCCC(C)C1(C(=O)NC(=O)NC1=O)CC	Non-active	Non-active	Non-active	Non-active	Non-active	Non-active
4762	CC1C(OCCN1)C2=CC=CC=C2	Non-active	Non-active	Non-active	Non-active	Active	Non-active
4888	CC(C1=CC2=C(C=C1)OC3=C(C2)C=CC=N3)C(=O)O	Non-active	Non-active	Non-active	Non-active	Active	Non-active
5161	C1=CC=C(C(=C1)C(=O)OC2=CC=CC=C2C(=O)O)O	Non-active	Non-active	Non-active	Active	Active	Non-active
5195	CC(CC1=CC=CC=C1)N(C)CC#C	Non-active	Non-active	Non-active	Non-active	Active	Non-active
5255	CC(=O)NC(CC(=O)O)C(=O)NC(CCC(=O)O)C(=O)O	Non-active	Non-active	Non-active	Active	Non-active	Non-active
5290	COC1=C(C=C2C3CC4=C(CN3CCC2=C1)C(=C(C=C4)O)OC)O	Non-active	Non-active	Non-active	Active	Active	Non-active
5576	CC1(C(=O)N(C(=O)O1)C)C	Non-active	Non-active	Non-active	Non-active	Non-active	Non-active
5587	CN(C)CCN(CC1=CC=CC=C1)C2=CC=CC=N2	Non-active	Non-active	Non-active	Non-active	Active	Non-active
5726	CC1=CN(C(=O)NC1=O)C2CC(C(O2)CO)N=[N+]=[N-]	Non-active	Non-active	Non-active	Active	Active	Non-active
5733	CC1=C(N(C(=C1)CC(=O)O)C)C(=O)C2=CC=C(C=C2)Cl	Non-active	Non-active	Non-active	Non-active	Active	Non-active
5802	C1=C(C(=O)NC(=O)N1)Br	Non-active	Non-active	Non-active	Non-active	Non-active	Non-active
6168	CCN1C=NC(=C1C(=O)NC)C(=O)NC	Non-active	Non-active	Non-active	Non-active	Active	Non-active
6575	C(=C(Cl)Cl)Cl	Non-active	Non-active	Non-active	Active	Active	Non-active
6834	CN(C)CCC(C1=CC=C(C=C1)Br)C2=CC=CC=N2	Non-active	Non-active	Non-active	Non-active	Active	Non-active
7029	CCN(CC)C(C)C(=O)C1=CC=CC=C1	Non-active	Non-active	Non-active	Non-active	Active	Non-active
7176	CC(C)COC(=O)C1=CC=C(C=C1)N	Non-active	Non-active	Non-active	Non-active	Active	Non-active
8082	C1CCNCC1	Non-active	Non-active	Non-active	Active	Active	Non-active
8522	CC1=C(C(=O)N(N1C)C2=CC=CC=C2)I	Non-active	Non-active	Non-active	Non-active	Active	Non-active
9296	CS(=O)(=O)OCC(C(COS(=O)(=O)C)O)O	Non-active	Non-active	Non-active	Non-active	Non-active	Non-active
9801	CC(CC1=CC=CC=C1)NCCC(C2=CC=CC=C2)C3=CC=CC=C3	Non-active	Non-active	Non-active	Active	Active	Non-active
10660	CN1C2=C(C(=O)N(C1=O)C)NC(=N2)Cl	Non-active	Non-active	Non-active	Non-active	Active	Non-active
10836	C[C@@H](CC1=CC=CC=C1)NC	Non-active	Non-active	Non-active	Non-active	Active	Non-active
11391	C1CN(CC2=CC=CC=C21)C(=N)N	Non-active	Non-active	Non-active	Non-active	Active	Non-active
12938	CCC1(C(=O)NC(=O)N(C1=O)C(=O)C2=CC=CC=C2)C3=CC=CC=C3	Non-active	Non-active	Non-active	Non-active	Active	Non-active
15004	CCCOC(=O)CC1=CC(=C(C=C1)OCC(=O)N(CC)CC)OC	Non-active	Non-active	Non-active	Non-active	Active	Non-active
16058	C1C(O1)COCCOCCOCCOCC2CO2	Non-active	Non-active	Non-active	Non-active	Non-active	Non-active
17134	COC1=C(N=CN=C1OC)NS(=O)(=O)C2=CC=C(C=C2)N	Non-active	Non-active	Non-active	Non-active	Active	Non-active
17198	CC(=O)C1=CC(=C(C(=C1)OC)O)OC	Non-active	Non-active	Non-active	Non-active	Active	Non-active
26534	CCNC1(CCCCC1=O)C2=CC=CS2	Non-active	Non-active	Non-active	Non-active	Active	Non-active
28718	CC1=C(C=CC=C1Cl)NC2=C(C=CC=N2)C(=O)O	Non-active	Non-active	Non-active	Non-active	Active	Non-active
41643	CCC(C1=CC=C(C=C1)CC(C)C)C(=O)O	Non-active	Non-active	Non-active	Non-active	Active	Non-active
43261	CC1(O[C@@H]2[C@H]([C@H](O[C@@H]2O1)C(CO)O)OCCCN(C)C)C	Non-active	Non-active	Non-active	Active	Non-active	Non-active
50294	CCCC1=C2C(=CC3=C1OC(=CC3=O)C(=O)O)C(=O)C=C(N2CC)C(=O)O	Non-active	Non-active	Non-active	Active	Non-active	Non-active
53421	CCOP(=O)(CC1=CC=C(C=C1)C2=NC3=CC=CC=C3S2)OCC	Non-active	Non-active	Non-active	Active	Active	Non-active
64747	CC(C1=CC(=CC=C1)OC2=CC=CC=C2)C(=O)[O-]	Non-active	Non-active	Non-active	Non-active	Active	Non-active
65394	C1=CC=C(C(=C1)CC(=O)O)OC2=C(C=C(C=C2)Cl)Cl	Non-active	Non-active	Non-active	Non-active	Active	Non-active
65709	CCN(CC)CCN1C2=CC=CC=C2N=C(C1=O)CC3=CC=C(C=C3)OC	Non-active	Non-active	Non-active	Active	Active	Non-active
65800	C1CN1P2(=NP(=NP(=N2)(N3CC3)N4CCOCC4)(N5CC5)N6CC6)N7CC7	Non-active	Non-active	Non-active	Non-active	Non-active	Non-active
65953	CC1=C(C(C(=C(N1)COC(=O)N)C(=O)OC(C)C)C2=C(C(=CC=C2)Cl)Cl)C(=O)OC	Non-active	Non-active	Non-active	Active	Non-active	Active
68476	C1=CC=C2C(=C1)C(=CC=N2)N	Non-active	Non-active	Non-active	Non-active	Active	Non-active
68911	C[C@@H]1CC[C@H]2[C@H]([C@H](O[C@H]3[C@@]24[C@H]1CC[C@](O3)(OO4)C)OC)C	Non-active	Non-active	Non-active	Active	Non-active	Non-active
71171	C[C@@]1(C(=O)N2[C@H](C(=O)N3CCC[C@H]3[C@@]2(O1)O)CC4=CC=CC=C4)NC(=O)[C@@H]5C[C@H]6[C@@H](CC7=CNC8=CC=CC6=C78)N(C5)C	Non-active	Non-active	Non-active	Active	Active	Non-active
91657	CC1=NC=C(C(=N1)N)CNC(=O)N(CCCl)N=O	Non-active	Non-active	Non-active	Non-active	Non-active	Non-active
96563	C1CN1P(=O)(N2CC2)N3CCN(CC3)P(=O)(N4CC4)N5CC5	Non-active	Non-active	Non-active	Non-active	Non-active	Non-active
115358	CC1=CC(=NC2=C1C(=C(C=C2NC(C)CCCN)OC)OC3=CC=CC(=C3)C(F)(F)F)OC	Non-active	Non-active	Non-active	Active	Active	Non-active
119171	CC1=C(C(C(=C(N1)C)P2(=O)OCC(CO2)(C)C)C3=CC(=CC=C3)[N+](=O)[O-])C(=O)OCCN(CC4=CC=CC=C4)C5=CC=CC=C5	Non-active	Non-active	Non-active	Active	Non-active	Non-active
122292	CC1=C([C@H](C(=C(N1)C)[N+](=O)[O-])C2=CC=CC3=NON=C32)C(=O)OC(C)C	Non-active	Non-active	Non-active	Non-active	Active	Non-active
221508	C=C[C@H]1CN2CCC1C[C@@H]2C(C3=CC=NC4=CC=CC=C34)O	Non-active	Non-active	Non-active	Non-active	Non-active	Non-active
259329	C[C@]12CC[C@H]3[C@H]([C@@H]1CC[C@@H]2OP(=O)(O)O)CCC4=C3C=CC(=C4)OC(=O)N(CCCl)CCCl	Non-active	Non-active	Non-active	Active	Non-active	Non-active
263976	C1CC(OC1CO)N2C=NC3=C2N=CN=C3N	Non-active	Non-active	Non-active	Non-active	Active	Non-active
439268	C1[C@H]([C@@H]([C@H](OC1O)CO)O)O	Non-active	Non-active	Non-active	Non-active	Non-active	Non-active
439302	CC[C@H](C)[C@H]1C(=O)N[C@H](C(=O)N[C@H](C(=O)N[C@@H](CSSC[C@@H](C(=O)N[C@H](C(=O)N1)CC2=CC=C(C=C2)O)N)C(=O)N3CCC[C@H]3C(=O)N[C@@H](CC(C)C)C(=O)NCC(=O)N)CC(=O)N)CCC(=O)N	Non-active	Non-active	Non-active	Active	Non-active	Active
444025	CCOC(=O)O[C@@]1(CC[C@@H]2[C@@]1(C[C@@H]([C@H]3[C@H]2CCC4=CC(=O)C=C[C@]34C)O)C)C(=O)OCCl	Non-active	Non-active	Non-active	Active	Non-active	Non-active
470087	CCC(CO)NCCNC(CC)CO	Non-active	Non-active	Non-active	Non-active	Active	Non-active
656668	CC1=C([C@H](C(=C(N1)C)C(=O)O[C@@H]2CCCN(C2)CC3=CC=CC=C3)C4=CC(=CC=C4)[N+](=O)[O-])C(=O)OC	Non-active	Non-active	Non-active	Active	Active	Non-active
708857	CN1CCCN=C1/C=C/C2=CC=CS2	Non-active	Non-active	Non-active	Non-active	Active	Non-active
3000715	CCCC(C)C1(C(=O)NC(=S)NC1=O)CC	Non-active	Non-active	Non-active	Non-active	Non-active	Non-active
3032285	CCCC(C)C1(C(=O)NC(=S)NC1=O)CC=C	Non-active	Non-active	Non-active	Non-active	Non-active	Non-active
3033867	C(CCl)NC[C@H]([C@H]([C@@H]([C@@H](CNCCCl)O)O)O)O	Non-active	Non-active	Non-active	Non-active	Non-active	Non-active
3033980	CC1=C(C2=C(N1C(=O)C3=CC=C(C=C3)Cl)C=CC(=C2)OC)CC(=O)N[C@@H](C=O)[C@H]([C@@H]([C@@H](CO)O)O)O	Non-active	Non-active	Non-active	Active	Active	Non-active
5280914	CCCCC[C@@H](/C=C/C=C\C=C\C=C\[C@H]([C@H](CCCC(=O)O)O)O)O	Non-active	Non-active	Non-active	Active	Active	Non-active
5281072	CC[C@@H](CO)NC(=O)[C@H]1CN([C@@H]2CC3=CNC4=CC=CC(=C34)C2=C1)C	Non-active	Non-active	Non-active	Active	Active	Non-active
5284381	C([C@@H]([C@H]([C@@H]([C@H](CBr)O)O)O)O)Br	Non-active	Non-active	Non-active	Non-active	Active	Non-active
5311101	C[C@@H]1C[C@H]2[C@@H]3C[C@@H](C4=CC(=O)C=C[C@@]4([C@]3([C@H](C[C@@]2([C@]1(C(=O)SCF)O)C)O)F)C)F	Non-active	Non-active	Non-active	Active	Non-active	Non-active
5360515	C1CC1CN2CC[C@]34[C@@H]5C(=O)CC[C@]3([C@H]2CC6=C4C(=C(C=C6)O)O5)O	Non-active	Non-active	Non-active	Active	Non-active	Non-active
5489013	C[C@@H]([C@@H](C1=CC=CC=C1)O)NCCC(=O)C2=CC(=CC=C2)OC	Non-active	Non-active	Non-active	Non-active	Active	Non-active
5702117	C1CCN2CC3C[C@H]([C@@H]2C1)CN4[C@@H]3CCCC4	Non-active	Non-active	Non-active	Active	Active	Non-active
5702153	C=C[C@H]1CN2CC[C@H]1C[C@@H]2[C@@H](C3=CC=NC4=CC=CC=C34)O	Non-active	Non-active	Non-active	Non-active	Non-active	Non-active
6335412	C1=CC(=CC=C1C(=O)NCCC(=O)O)N/N=C\2/C=CC(=O)C(=C2)C(=O)O	Non-active	Non-active	Non-active	Active	Active	Non-active
6337640	C[C@]12C3=CC=CC=C3C[C@H](N1)C4=CC=CC=C24	Non-active	Non-active	Non-active	Non-active	Non-active	Non-active
9570076	CC(C)N=C(N)/N=C(\N)/NC1=CC=C(C=C1)Cl	Non-active	Non-active	Non-active	Non-active	Active	Non-active
9882105	CS(=O)(=O)OC[C@@H]([C@H](COS(=O)(=O)C)O)O	Non-active	Non-active	Non-active	Non-active	Non-active	Non-active
11954258	CCSC1=CC2=C(C=C1)SC3=CC=CC=C3N2CCCN4CCN(CC4)C	Non-active	Non-active	Non-active	Active	Active	Non-active
11957643	C1CC1CN2CCC34[C@@H]5C(=O)CC[C@]3(C2CC6=C4C(=C(C=C6)O)O5)O	Non-active	Non-active	Non-active	Active	Active	Non-active
16760658	C1=CC=C(C(=C1)C(=O)[O-])O	Non-active	Non-active	Non-active	Non-active	Active	Non-active
18004024	CN1CCN(CC1)CCCCN2C(=O)CN(C2=O)/N=C/C3=CC=C(O3)C4=CC=C(C=C4)Cl	Non-active	Non-active	Non-active	Active	Active	Non-active
23663403	CC1(C[C@@H]1C(=O)N/C(=C\CCCCSC[C@@H](C(=O)O)N)/C(=O)[O-])C	Non-active	Non-active	Non-active	Non-active	Non-active	Active
23673837	CCCCC(CC)COC(=O)CC(C(=O)OCC(CC)CCCC)S(=O)(=O)[O-]	Non-active	Non-active	Non-active	Non-active	Active	Non-active
24867475	C[C@H]1CC2[C@@H]3CCC4=CC(=O)C=C[C@@]4([C@]3([C@H](C[C@@]2([C@]1(C(=O)CO)O)C)O)Cl)C	Non-active	Non-active	Non-active	Non-active	Active	Non-active
44363233	CCN1C[C@@]2(CC[C@@H]([C@@]34C2CC(C31)[C@]5(C[C@@H]([C@H]6CC4[C@@]5([C@H]6OC)O)OC)O)OC)OC(=O)C7=CC=CC=C7NC(=O)C	Non-active	Non-active	Non-active	Active	Non-active	Non-active
67955	CNC1=NC=NC2=C1NC=N2	Non-active	Non-active	Non-active	Non-active	Active	Non-active
90624	C[C@@H](O)[C@@H](N)C(O)=O	Non-active	Non-active	Non-active	Non-active	Non-active	Non-active
114751	OC(=O)C1CSCN1C(=O)C1CCC(=O)N1	Non-active	Non-active	Non-active	Non-active	Non-active	Non-active
115162	CC(C)(C)C(=O)OCOC(=O)[C@@H]1N2[C@H](SC1(C)C)[C@H](N=CN1CCCCCC1)C2=O	Non-active	Non-active	Non-active	Non-active	Non-active	Non-active
273362	OC(=O)C(CC1=CC=CC=C1)NC(=O)C1=CC=CC=C1	Non-active	Non-active	Non-active	Non-active	Active	Non-active
287291	CC(C=CC1(O)C(C)=CC(=O)CC1(C)C)=CC(O)=O	Non-active	Non-active	Non-active	Non-active	Non-active	Non-active
441411	CNC[C@H](O)C1=CC(O)=C(O)C=C1	Non-active	Non-active	Non-active	Non-active	Active	Non-active
522636	CC12C3C(C(O)=O)C45CC(=C)C(O)(C4)CCC5C3(OC1=O)C=CC2O	Non-active	Non-active	Non-active	Active	Non-active	Active
5281166	CC\C=C/C[C@@H]1[C@@H](CC(O)=O)CCC1=O	Non-active	Non-active	Non-active	Non-active	Non-active	Non-active
5281929	CC\C=C/C[C@@H]1[C@@H](CC(=O)OC)CCC1=O	Non-active	Non-active	Non-active	Non-active	Non-active	Non-active
5283740	C[C@H](CCCC(C)(C)O)[C@H]1CC[C@H]2\C(CCC[C@]12C)=C\C=C1/C[C@@H](O)C[C@H](O)C1=C	Non-active	Non-active	Non-active	Active	Non-active	Non-active
5311018	COC(=O)\C=C\C(=O)N[C@@H]1CC[C@@]2(O)[C@H]3CC4=C5C(O[C@@H]1[C@@]25CCN3CC1CC1)=C(O)C=C4	Non-active	Non-active	Non-active	Active	Non-active	Non-active
5480431	CC[C@H]1OC(=O)[C@H](C)[C@@H](O[C@@H]2O[C@@H](C)[C@H](O)[C@](C)(OC)C2)[C@H](C)[C@@H](O[C@@H]2O[C@H](C)C[C@H](N(C)C)[C@H]2O)[C@](C)(O)C[C@@H](C)\C(=N\OCOCCOC)[C@H](C)[C@@H](O)[C@@]1(O)C	Non-active	Non-active	Non-active	Active	Non-active	Active
5702122	CC(C)(C)NC[C@@H](O)COC1=NSN=C1N1CCOCC1	Non-active	Non-active	Non-active	Non-active	Active	Non-active
6434253	C[C@H](CCC(O)C(C)(C)O)[C@H]1CC[C@H]2\C(CCC[C@]12C)=C\C=C1\C[C@@H](O)CCC1=C	Non-active	Non-active	Non-active	Active	Non-active	Non-active
6440982	C\C(CO)=C/CNC1=NC=NC2=C1N=CN2[C@@H]1O[C@H](CO)[C@@H](O)[C@H]1O	Non-active	Non-active	Non-active	Active	Non-active	Active
7059474	CC(C)CCC[C@H](C)CCC[C@@H](C)CCC[C@@]1(C)CCC2=C(C)C(OC(C)=O)=C(C)C(C)=C2O1	Non-active	Non-active	Non-active	Non-active	Non-active	Non-active
54603482	NC1=NC(=O)C2=C(NCC(CNC3=CC=C(C=C3)C(=O)N[C@@H](CCC(O)=O)C(O)=O)N2C=O)N1	Non-active	Non-active	Non-active	Active	Active	Non-active
445	CC(NC(C)(C)C)C(O)C1=CC(Cl)=CC=C1	Non-active	Non-active	Non-active	Non-active	Active	Non-active
718	OC1C(O)C(O)(COP(O)(O)=O)OC1COP(O)(O)=O	Non-active	Non-active	Non-active	Active	Non-active	Non-active
1030	CC(O)CO	Non-active	Non-active	Non-active	Non-active	Active	Non-active
2117	CC(C)CCCC(C)CCCC(C)CCCC1(C)CCC2=C(C)C(OC(C)=O)=C(C)C(C)=C2O1	Non-active	Non-active	Non-active	Non-active	Non-active	Non-active
3255	CCC1OC(=O)C(C)C(OC2CC(C)(OC)C(O)C(C)O2)C(C)C(OC2OC(C)CC(C2O)N(C)C)C(C)(O)CC(C)C(=O)C(C)C(O)C1(C)O	Non-active	Non-active	Non-active	Active	Non-active	Active
6163	CCOS(=O)(=O)OCC	Non-active	Non-active	Non-active	Non-active	Non-active	Non-active
8536	CC1(CC(=O)C2=CC=CC=C2C1=O)S(O)(=O)=O	Non-active	Non-active	Non-active	Non-active	Active	Non-active
8868	CCOC(=O)CC(C)=O	Non-active	Non-active	Non-active	Non-active	Active	Non-active
13551	CC(C)OS(C)(=O)=O	Non-active	Non-active	Non-active	Non-active	Non-active	Non-active
14992	OC1=C(C=C(Cl)C=C1)C(=O)NC1=C(Cl)C=C(C=C1)[N+]([O-])=O	Non-active	Non-active	Non-active	Active	Active	Non-active
22318	OC(=O)CC(S)C(O)=O	Non-active	Non-active	Non-active	Non-active	Non-active	Non-active
22469	CC(=O)ON(C(C)=O)C1=CC2=C(C=C1)C1=CC=CC=C1C2	Non-active	Non-active	Non-active	Non-active	Active	Non-active
27982	OP(O)(=O)CCCl	Non-active	Non-active	Non-active	Non-active	Active	Non-active
33672	CC1(C)S[C@@H]2[C@H](NC(=O)C(C(=O)OC3=CC=CC=C3)C3=CC=CC=C3)C(=O)N2[C@H]1C(O)=O	Non-active	Non-active	Non-active	Active	Non-active	Active
65115	OC[C@H]1O[C@@H](OC2=CC=C(C=C2)[N+]([O-])=O)[C@H](O)[C@@H](O)[C@H]1O	Non-active	Non-active	Non-active	Active	Active	Non-active
518924	N1C2=NC3=NC(=NC4=C5C=CC=CC5=C(N4)N=C4N=C(N=C1C1=CC=CC=C21)C1=CC=CC=C41)C1=CC=CC=C31	Non-active	Non-active	Non-active	Active	Active	Non-active
5837004	CCC1OC(=O)C(C)C(OC2CC(C)(OC)C(O)C(C)O2)C(C)C(OC2OC(C)CC(C2O)N(C)C)C(C)(O)CC(C)\C(=N\OCOCCOC)C(C)C(O)C1(C)O	Non-active	Non-active	Non-active	Active	Non-active	Active
9567537	COC1=CC(CC2=CN=C(\N=C3/C(=O)N(CN4CCN(CC4)C4=C(F)C=C5C(=O)C(=CN(C6CC6)C5=C4)C(O)=O)C4=C3C=C(F)C=C4)N=C2N)=CC(OC)=C1OC	Non-active	Non-active	Non-active	Active	Active	Non-active

## Sheet: Table S3
Table S3. Data set, overall activity, antitumor and antibiotic activities, RF predictions for the overall activity, antitumor and antibiotic activities obtained for the test set I.
CID	SMILES	Overall activity	Antitumor activity	Antibiotic activity	Predicted overall activity	Predicted antitumor activity	Predicted antibiotic activity
89594	CN1CCC[C@H]1C2=CN=CC=C2	Active	Active	Non-active	Non-active	Active	Active-No
2336	C1=CC=C2C3=C4C(=CC2=C1)C=CC5=C4C(=CC=C5)C=C3	Active	Active	Non-active	Active	Active	Active-No
9177	C1=CC=C2C(=C1)C=CC3=NC4=C(C=C32)C5=CC=CC=C5C=C4	Active	Active	Non-active	Active	Active	Active-No
9153	C1=CC=C2C3=C4C(=CC=C3)C5=CC=CC=C5C4=CC2=C1	Active	Active	Non-active	Active	Active	Active-No
5889	C1=CC=C2C(=C1)C=CC3=CC4=C(C=CC5=CC=CC=C54)C=C32	Active	Active	Non-active	Active	Active	Active-No
42128	C1=C2C3=CC(=C(C(=C3OC2=CC(=C1Cl)Cl)Cl)Cl)Cl	Active	Active	Non-active	Active	Active	Active-No
43495	C1=C2C3=CC(=C(C(=C3OC2=C(C(=C1Cl)Cl)Cl)Cl)Cl)Cl	Active	Active	Non-active	Active	Active	Active-No
38251	C1=C2C(=CC(=C1Cl)Cl)OC3=C(O2)C(=C(C(=C3Cl)Cl)Cl)Cl	Active	Active	Non-active	Active	Active	Active-No
15625	C1=C2C(=CC(=C1Cl)Cl)OC3=CC(=C(C=C3O2)Cl)Cl	Active	Active	Non-active	Active	Active	Active-No
5794	CCCCOCCOCCOCC1=CC2=C(C=C1CCC)OCO2	Active	Active	Non-active	Non-active	Active	Active-No
16180	C1=CC(=C(C=C1Cl)Cl)OCC(=O)O	Active	Active	Non-active	Non-active	Active	Active-No
393472	CCCCCCC(C(CCC(C1CCC(O1)CCCCC(CC2=CC(OC2=O)C)O)O)O)O	Active	Active	Non-active	Active	Active	Active-No
457831	C[C@@H]1[C@H]([C@@H](C[C@@H](O1)O[C@@H]2C[C@@H](O[C@@H]([C@@H]2O)C)OC3=CC4=CC5=C(C(=O)[C@H]([C@@H](C5)[C@@H](C(=O)[C@H]([C@@H](C)O)O)OC)O[C@H]6C[C@H]([C@@H]([C@H](O6)C)O)O[C@H]7C[C@H]([C@@H]([C@H](O7)C)O)O[C@H]8C[C@]([C@@H]([C@H](O8)C)O)(C)O)C(=C4C(=C3C)O)O)O)O	Active	Active	Active	Active	Non-active	Active
126941	CN(CC1=CN=C2C(=N1)C(=NC(=N2)N)N)C3=CC=C(C=C3)C(=O)N[C@@H](CCC(=O)O)C(=O)O	Active	Active	Non-active	Active	Active	Active-No
5284610	C[C@@H]1[C@H]([C@@H](C[C@@H](O1)O[C@@H]2C[C@@H](O[C@@H]([C@@H]2O)C)OC3=CC4=CC5=C(C(=O)[C@H](C(C5)[C@@H](C(=O)[C@H]([C@@H](C)O)O)OC)O[C@H]6C[C@H]([C@@H]([C@H](O6)C)O)O[C@H]7C[C@H]([C@@H]([C@H](O7)C)O)O[C@H]8C[C@]([C@@H]([C@H](O8)C)O)(C)O)C(=C4C(=C3C)O)O)O)O	Active	Active	Active	Active	Non-active	Active
55245	CC#C[C@@]1(CC[C@@H]2[C@@]1(C[C@@H](C3=C4CCC(=O)C=C4CC[C@@H]23)C5=CC=C(C=C5)N(C)C)C)O	Active	Active	Non-active	Active	Active	Active-No
656725	C1=CC=C2C(=C1)C(=O)C3=C(C2=O)C(=C(C=C3NC4=CC(=C(C=C4)NC5=NC(=NC(=N5)NC6=CC(=CC=C6)S(=O)(=O)O)Cl)S(=O)(=O)O)S(=O)(=O)O)N	Active	Active	Non-active	Active	Active	Active-No
457193	C[C@@H]1[C@@H](C(=O)N[C@@H](C(=O)N2CCC[C@H]2C(=O)N(CC(=O)N([C@H](C(=O)O1)C(C)C)C)C)C(C)C)NC(=O)C3=C4C(=C(C=C3)C)OC5=C(C(=O)C(=C(C5=N4)C(=O)N[C@H]6[C@H](OC(=O)[C@@H](N(C(=O)CN(C(=O)[C@@H]7CCCN7C(=O)[C@H](NC6=O)C(C)C)C)C)C(C)C)C)N)C	Active	Active	Non-active	Active	Active	Active
444732	C[C@H](/C=C(\C)/C=C/C(=O)NO)C(=O)C1=CC=C(C=C1)N(C)C	Active	Active	Active	Non-active	Active	Active-No
441404	C[C@]12CC[C@H]3[C@H]([C@@H]1CC[C@@H]2OC(=O)CCC4CCCC4)CCC5=CC(=O)CC[C@]35C	Active	Active	Non-active	Active	Active	Active-No
439647	CC1=CC=C(C=C1)S(=O)(=O)N[C@@H](CC2=CC=CC=C2)C(=O)CCl	Active	Active	Non-active	Non-active	Active	Active-No
275784	COC1=CC(=CC(=C1O)OC)[C@H]2[C@@H]3[C@H](COC3=O)[C@@H](C4=CC5=C(C=C24)OCO5)OC6C(C(C7C(O6)COC(O7)C8=CC=CS8)O)O	Active	Active	Non-active	Active	Active	Active-No
244809	C[C@]12CC[C@H]3[C@H]([C@@H]1C[C@H]([C@H]2O)O)CCC4=C3C=CC(=C4)OC	Active	Active	Non-active	Active	Active	Active-No
169870	CCCCCC(=O)O[C@@]1(CC[C@@H]2[C@@]1(CC[C@H]3[C@H]2CCC4=CC(=O)CC[C@]34C)C)C(=O)C	Active	Active	Non-active	Non-active	Active	Active-No
123756	CNC1=CC=CC=C1C(=O)O[C@@H]2[C@H](O[C@H]([C@@H]2O)N3C=NC4=C3N=CN=C4N)COP(=O)(O)OP(=O)(O)OP(=O)(O)O	Active	Active	Non-active	Active	Active	Active-No
104772	CCCCN(C)C(=O)CCCCCCCCCC[C@@H]1CC2=C(C=CC(=C2)O)[C@@H]3[C@@H]1[C@@H]4CC[C@@H]([C@]4(CC3)C)O	Active	Active	Non-active	Active	Non-active	Active-No
70684	C(C(=O)C(=O)O)Br	Active	Active	Non-active	Non-active	Active	Active-No
54675769	CC1=C(C=CC2=C1OC(=O)C(=C2O)NC(=O)C3=CC(=C(C=C3)O)CC=C(C)C)O[C@H]4[C@@H]([C@@H]([C@H](C(O4)(C)C)OC)OC(=O)N)O	Active	Active	Active	Active	Non-active	Active
44264743	C[C@]12CCC3C(C1CC[C@@H]2O)CCC4=CC(=O)CCC34	Active	Active	Non-active	Active	Active	Active-No
11979535	CCC1NC(=O)C(NC(=O)C2=C(O)C=CC=N2)C(C)OC(=O)C(NC(=O)C2CC(=O)CCN2C(=O)C(CC2=CC=CC=C2)N(C)C(=O)C2CCCN2C1=O)C1=CC=CC=C1	Active	Active	Active	Active	Non-active	Active
16197727	CCCC[C@@H](C(=O)N[C@@H](CCC(=O)O)C(=O)N[C@@H](CC1=CN=CN1)C(=O)N[C@H](CC2=CC=CC=C2)C(=O)N[C@@H](CCCNC(=N)N)C(=O)N[C@@H](CC3=CNC4=CC=CC=C43)C(=O)NCC(=O)N[C@@H](CCCCN)C(=O)N5CCC[C@H]5C(=O)N[C@@H](C(C)C)C(=O)N)NC(=O)[C@H](CO)NC(=O)[C@H](CC6=CC=C(C=C6)O)NC(=O)[C@H](CO)NC(=O)C	Active	Active	Non-active	Active	Non-active	Active-No
9799453	CS(=O)(=O)NC1=C(C=C2C(=C1)CCC2=O)SC3=C(C=C(C=C3)F)F	Active	Active	Non-active	Active	Active	Active-No
5702072	CCCCCC(=O)O[C@@]1(CCC2[C@@]1(CCC3C2CCC4=CC(=O)CC[C@]34C)C)C(=O)C	Active	Active	Non-active	Non-active	Active	Active-No
6409633	C/C(=N\O)/C(=O)C	Active	Active	Non-active	Non-active	Active	Active-No
5458213	C[C@H]1/C=C/C=C(\C(=O)NC\2=C(C3=C(C(=C4C(=C3C(=O)/C2=C\NN5CCN(CC5)C)C(=O)[C@](O4)(O/C=C/[C@@H]([C@H]([C@H]([C@@H]([C@@H]([C@@H]([C@H]1O)C)O)C)OC(=O)C)C)OC)C)C)O)O)/C	Active	Active	Active	Active	Non-active	Active
5351560	CC1C(C(CC(O1)O[C@H]2[C@@H](CC3=C(C2=O)C(=C4C(=C3)C=C(C(=C4O)C)OC5CC(C(C(O5)C)OC(=O)C)OC6CC(C(C(O6)C)OC)O)O)[C@@H](C(=O)[C@H]([C@@H](C)O)O)OC)OC7CC(C(C(O7)C)O)OC8CC(C(C(O8)C)OC(=O)C)(C)O)O	Active	Active	Active	Active	Non-active	Active
5312153	CS(=O)(=O)NC(=O)CCC/C=C\C[C@@H]1[C@H]([C@@H](CC1=O)O)/C=C/[C@H](COC2=CC=CC=C2)O	Active	Active	Non-active	Active	Active	Active-No
5281605	C1=CC=C(C=C1)C2=CC(=O)C3=C(C(=C(C=C3O2)O)O)O	Active	Active	Non-active	Active	Active	Active-No
5281051	CC1=CC(=C2C3=C1C4=C5C(=C(C=C4C)O)C(=O)C6=C(C=C(C7=C6C5=C3C8=C7C(=CC(=C8C2=O)O)O)O)O)O	Active	Active	Non-active	Active	Active	Active-No
5280373	COC1=CC=C(C=C1)C2=COC3=CC(=CC(=C3C2=O)O)O	Active	Active	Non-active	Active	Active	Active-No
3033767	CC/C(=C(/C1=CC=C(C=C1)OCCN(C)C)\C2=CC(=CC=C2)O)/C3=CC=CC=C3	Active	Active	Non-active	Active	Active	Active-No
65781	CC(C)C1=C(C=C2C(=C1)CC[C@@H]3[C@@]2(CCC[C@@]3(C)C(=O)O)C)S(=O)(=O)O	Active	Active	Non-active	Non-active	Active	Active-No
60652	C1=CC(=CC(=C1)Cl)C(C2=CC3=C(C=C2)N=CN3)N4C=CN=C4	Active	Active	Non-active	Active	Active	Active-No
55191	CC1(CC(=O)N(C(=O)C1)CCCCN2CCN(CC2)C3=NC=CC=N3)C	Active	Active	Non-active	Non-active	Active	Active-No
44668	C1CNCCC1CCC2=CNC3=CC=CC=C32	Active	Active	Non-active	Non-active	Active	Active-No
28417	C[C@]12CC[C@H]3[C@H]([C@@H]1CC[C@]2(C#C)O)CCC4=CC5=C(C[C@]34C)C=NO5	Active	Active	Non-active	Active	Active	Active-No
20179	C1CN=C(N1)NC2=C(C=CC=C2Cl)C	Active	Active	Non-active	Non-active	Active	Active-No
9904	C[C@]12CC[C@H]3[C@H]([C@@H]1CC[C@@H]2O)CCC4=CC(=O)CC[C@H]34	Active	Active	Non-active	Active	Active	Active-No
9046	C[C@]12CC[C@H]3[C@H]([C@@H]1CC[C@]2(C#C)O)CCC4=C3C=CC(=C4)OC5CCCC5	Active	Active	Non-active	Active	Active	Active-No
6222	CCN(CC)CCOC1=CC=C(C=C1)C(CC2=CC=C(C=C2)OC)(C3=CC=CC=C3)O	Active	Active	Non-active	Non-active	Active	Active-No
5894	C1=C2C(=CC(=C1Cl)Cl)N(C=N2)[C@H]3[C@@H]([C@@H]([C@H](O3)CO)O)O	Active	Active	Non-active	Active	Active	Active-No
5757	C[C@]12CC[C@H]3[C@H]([C@@H]1CC[C@@H]2O)CCC4=C3C=CC(=C4)O	Active	Active	Non-active	Active	Active	Active-No
5231	CC(=O)NC(C(=O)O)C(C)(C)SN=O	Active	Active	Non-active	Non-active	Active	Active-No
4780	C1=CC=C(C=C1)N=C(N)N=C(N)N	Active	Active	Non-active	Non-active	Active	Active-No
4080	CC12CCC3C(C1CCC2(C#C)O)CCC4=C3C=CC(=C4)OC	Active	Active	Non-active	Active	Active	Active-No
3394	CC(C1=CC(=C(C=C1)C2=CC=CC=C2)F)C(=O)O	Active	Active	Non-active	Non-active	Active	Active-No
2954	C1=CC(=CC=C1C2=CC3=C(N2)C=C(C=C3)C(=N)N)C(=N)N	Active	Active	Non-active	Active	Active	Active-No
2199	CC(=O)OC1C(CNC1CC2=CC=C(C=C2)OC)O	Active	Active	Active	Active	Non-active	Active
1725	C1=CC(=CC=C1C(=N)N)N	Active	Active	Non-active	Active	Active	Active-No
667490	C1=NC2=C(N1)C(=S)N=CN2	Active	Active	Non-active	Non-active	Active	Active-No
657181	CCNC(=O)[C@@H]1CCCN1C(=O)[C@H](CCCN=C(N)N)NC(=O)[C@H](CC(C)C)NC(=O)[C@@H](CC(C)C)NC(=O)[C@H](CC2=CC=C(C=C2)O)NC(=O)[C@H](CO)NC(=O)[C@H](CC3=CNC4=CC=CC=C43)NC(=O)[C@H](CC5=CN=CN5)NC(=O)[C@@H]6CCC(=O)N6	Active	Active	Non-active	Active	Non-active	Active-No
656601	CCC(C(C1=C2C=CC(=O)NC2=C(C=C1)O)O)NC(C)C	Active	Active	Non-active	Non-active	Active	Active-No
644210	C1[C@H](N(CC2=CC=CC=C21)C(=O)[C@H](CC3=CC=C(C=C3)O)N)C(=O)N[C@@H](CC4=CC=CC=C4)C(=O)N[C@@H](CC5=CC=CC=C5)C(=O)O	Active	Active	Non-active	Active	Active	Active-No
637552	COC1=CC2=C(C=CN=C2C=C1)[C@@H]([C@H]3C[C@H]4CCN3C[C@H]4C=C)O	Active	Active	Non-active	Active	Active	Active-No
518962	CCCC(C)(C1CC23C=CC1(C4C25CCN(C3CC6=C5C(=C(C=C6)O)O4)C)OC)O	Active	Active	Non-active	Non-active	Active	Active-No
493570	CC1=CC2=C(C=C1C)N(C3=NC(=O)NC(=O)C3=N2)C[C@@H]([C@@H]([C@@H](CO)O)O)O	Active	Active	Non-active	Active	Active	Active-No
462382	CC(C)C[C@@H](C=O)NC(=O)[C@H](CC(C)C)NC(=O)[C@H](CC(C)C)NC(=O)OCC1=CC=CC=C1	Active	Active	Non-active	Active	Active	Active-No
456390	C1C[C@@H]([C@H](NC1)CC(=O)CN2C=NC3=CC(=C(C=C3C2=O)Cl)Br)O	Active	Active	Non-active	Active	Active	Active-No
451705	C[C@]12[C@H]([C@H](C[C@H](O1)N3C4=CC=CC=C4C5=C6C(=C7C8=CC=CC=C8N2C7=C53)CNC6=O)NC)OC	Active	Active	Non-active	Active	Active	Active-No
449381	CCC(CC)O[C@@H]1C=C(C[C@@H]([C@H]1NC(=O)C)N)C(=O)O	Active	Active	Non-active	Non-active	Active	Active-No
446925	CC(=CCC/C(=C/C=C/C(=C/C=C/C(=C/C=C/C=C(/C=C/C=C(/C=C/C=C(/CCC=C(C)C)\C)\C)\C)/C)/C)/C)C	Active	Active	Non-active	Active	Active	Active-No
446556	C1=CC(=CC=C1CCC2=CNC3=C2C(=O)N=C(N3)N)C(=O)N[C@@H](CCC(=O)O)C(=O)O	Active	Active	Non-active	Active	Active	Active-No
446378	CCCCCCCC(=O)O[C@H]1[C@H]2C(=C([C@@H]1OC(=O)/C(=C\C)/C)C)[C@H]3[C@]([C@H](C[C@]2(C)OC(=O)C)OC(=O)CCC)([C@](C(=O)O3)(C)O)O	Active	Active	Non-active	Active	Non-active	Active
446155	CC(C)N1C2=CC=CC=C2C(=C1/C=C/[C@H](C[C@H](CC(=O)O)O)O)C3=CC=C(C=C3)F	Active	Active	Non-active	Active	Active	Active-No
445114	C[C@H]1[C@@H]([C@H]([C@H]([C@@H](O1)OP(=O)(N[C@@H](CC(C)C)C(=O)N[C@@H](CC2=CNC3=CC=CC=C32)C(=O)O)O)O)O)O	Active	Active	Non-active	Active	Non-active	Active
443946	C[C@@H]1[C@H]([C@H](C[C@@H](O1)O[C@@H]2[C@H](O[C@H](C[C@@H]2O)O[C@@H]3[C@H](O[C@H](C[C@@H]3O)O[C@H]4CC[C@]5([C@@H](C4)CC[C@@H]6[C@@H]5C[C@H]([C@]7([C@@]6(CC[C@@H]7C8=CC(=O)OC8)O)C)O)C)C)C)O)OC	Active	Active	Non-active	Active	Active	Active-No
443388	C#CCN(CC1=CC2=C(C=C1)NC(=NC2=O)N)C3=CC=C(C=C3)C(=O)N[C@@H](CCC(=O)O)C(=O)O	Active	Active	Non-active	Active	Active	Active-No
443118	CCCC[C@@H](C=O)NC(=O)[C@H](CC(C)C)NC(=O)[C@H](CC(C)C)NC(=O)C	Active	Active	Non-active	Non-active	Active	Active-No
441414	C[C@H](N)[C@H](O)C1=CC(O)=CC=C1	Active	Active	Non-active	Non-active	Active	Active-No
441364	CC(C)(C)C(C)([C@H]1C[C@@]23CCC1([C@H]4[C@@]25CCN([C@@H]3CC6=C5C(=C(C=C6)O)O4)CC7CC7)OC)O	Active	Active	Non-active	Non-active	Active	Active-No
441314	C1[C@@H]([C@H]([C@@H]([C@H](N1CCO)CO)O)O)O	Active	Active	Non-active	Non-active	Active	Active-No
441278	C[C@H]1[C@H]2CC3=C([C@@]1(CCN2CC=C(C)C)C)C=C(C=C3)O	Active	Active	Non-active	Non-active	Active	Active-No
440623	C[C@]12CC[C@H]3[C@H]([C@@H]1CCC2=O)CCC4=CC(=C(C=C34)O)O	Active	Active	Non-active	Active	Active	Active-No
439917	CC(=O)N[C@H](CC1=CNC2=CC=CC=C21)C(=O)O	Active	Active	Non-active	Non-active	Active	Active-No
439503	C1=CC=C(C(=C1)CO)O[C@H]2[C@@H]([C@H]([C@@H]([C@H](O2)CO)O)O)O	Active	Active	Non-active	Active	Active	Active-No
439299	CC(C)C[C@H](C(=O)O)NC(=O)[C@H]([C@@H](CC1=CC=CC=C1)N)O	Active	Active	Non-active	Non-active	Active	Active-No
413861	CC1=C(C(=CC=C1)O)C(=O)OCC2(C(C(C(C2(C)O)(C(C)O)NC(=O)N(C)C)N)NC3=CC=CC(=C3)C(=O)C)O	Active	Active	Active	Active	Active	Active
393595	C1=CC=C(C=C1)CC(=O)NC2=NC3=C(C=C(C=C3)Cl)C4=NC(=NN42)C5=CC=CO5	Active	Active	Non-active	Active	Active	Active-No
369312	CC(=C)[C@H]1CCC(=CC1)CO	Active	Active	Non-active	Non-active	Active	Active-No
356986	C1CN2CC([C@H](C([C@H]2[C@H]1O)O)O)O	Active	Active	Non-active	Non-active	Active	Active-No
330164	C1=C(C(C(C1N2C=NC3=C2N=CN=C3N)O)O)CO	Active	Active	Non-active	Active	Non-active	Active-No
315411	C(C1C(C(C(C(O1)O)F)O)O)O	Active	Active	Non-active	Non-active	Active	Active-No
291576	C1C(C(C(C(C1N)OC2C(C(C(C(O2)CN)O)O)N)OC3C(C(C(O3)CO)OC4C(C(C(C(O4)CN)O)O)N)O)O)N	Active	Active	Active	Active	Non-active	Active
273030	CN1CCC23C4C1CC5=C2C(=C(C=C5)OC)OC3C(CC4)O	Active	Active	Non-active	Active	Active	Active-No
250876	CC1C(C(C(C(O1)O[C@H]2C[C@]([C@@H](C3=C2C(=C4C(=C3)C(=O)C5=C6C(=CC(=C5C4=O)O)[C@]7([C@@H]([C@H]([C@@H]([C@@H](O6)O7)O)N(C)C)O)C)O)C(=O)OC)(C)O)OC)(C)OC)OC	Active	Active	Active	Active	Non-active	Active
235905	C[C@]12CC[C@H]3[C@H]([C@@H]1CC[C@]2(CC=C)O)CCC4=CCCC[C@H]34	Active	Active	Non-active	Active	Active	Active-No
229021	C[C@]12CC[C@@H](CC1=CC[C@@H]3[C@@H]2CC[C@]4([C@H]3CC[C@]4(C)O)C)O	Active	Active	Non-active	Active	Active	Active-No
220520	COC1=C(C=C2C(=C1)C34CCN5C3CC6C7C4N2C(=O)CC7OCC=C6C5)OC	Active	Active	Non-active	Active	Active	Active-No
216284	CC1CCC[C@@H](CCCCCC2=CC(=CC(=C2C(=O)O1)O)O)O	Active	Active	Non-active	Active	Active	Active-No
198382	C1C(C=CC=C1C(=O)O)N	Active	Active	Non-active	Non-active	Non-active	Active
187079	CC1C(=NNC(=O)S1)C2=CC3=C(C=C2)N(CCC3)C(=O)C4=CC(=C(C=C4)OC)OC	Active	Active	Non-active	Active	Active	Active-No
173685	C1[C@@H](C=CC=C1C(=O)O)N	Active	Active	Non-active	Non-active	Non-active	Active
168091	C#CC[C@@H](C(=O)O)N	Active	Active	Non-active	Active	Active	Active-No
164221	CC(C)CNC1CCS(=O)(=O)C2=C1C=C(S2)S(=O)(=O)N	Active	Active	Non-active	Active	Active	Active-No
156391	C[C@@H](C1=CC2=C(C=C1)C=C(C=C2)OC)C(=O)O	Active	Active	Non-active	Non-active	Active	Active-No
153999	CN(C)C[C@@H]1CCN2C=C(C3=CC=CC=C32)C4=C(C5=CN(CCO1)C6=CC=CC=C65)C(=O)NC4=O	Active	Active	Non-active	Active	Active	Active-No
150584	CNCCNS(=O)(=O)C1=CC=CC2=C1C=CN=C2	Active	Active	Non-active	Non-active	Active	Active-No
146571	CN(C)CCC[C@@]1(C2=C(CO1)C=C(C=C2)C#N)C3=CC=C(C=C3)F	Active	Active	Non-active	Non-active	Active	Active-No
135242	CN=C(N)NCCC[C@@H](C(=O)O)N	Active	Active	Non-active	Active	Active	Active-No
130611	C([C@@H]1[C@H]([C@@H]([C@@H]([C@@H]2N1C(=O)C(=O)N2)O)O)O)O	Active	Active	Non-active	Active	Non-active	Active-No
127676	C[C@]12CC[C@H]3[C@H]([C@@H]1CCC2=O)CCC4=C3C=CC(=C4)OS(=O)(=O)N	Active	Active	Non-active	Non-active	Active	Active-No
123992	C1CC(NC(=O)C1)C(=O)NC(CC2=CN=CN2)C(=O)N3CSCC3C(=O)N	Active	Active	Non-active	Active	Non-active	Active-No
123920	C1CNCC2=C1C=CC(=C2Cl)Cl	Active	Active	Non-active	Non-active	Active	Active-No
123831	CN(C)C(=NCCC[C@@H](C(=O)O)N)N	Active	Active	Non-active	Non-active	Active	Active-No
123804	C1=CC(=CC=C1C[C@@H](C(=O)N[C@@H](CCCN=C(N)N)C(=O)O)N)O	Active	Active	Non-active	Active	Non-active	Active-No
123664	CC(C)CCNC(=O)[C@H](CC(C)C)NC(=O)[C@@H]1[C@H](O1)C(=O)O	Active	Active	Non-active	Non-active	Active	Active-No
123608	C(CC(=O)O)C(=O)CN	Active	Active	Non-active	Active	Active	Active-No
122327	CCCCCCCCCCC(C)(C)C(=O)NC1=C(C=C(C=C1OC)OC)OC	Active	Active	Non-active	Non-active	Active	Active-No
122235	CCC1CCN(CC1)C(=O)[C@H](CCCN=C(N)N)NS(=O)(=O)C2=CC=CC3=C2C=CC=C3N(C)C	Active	Active	Non-active	Active	Active	Active-No
122140	CC(C)C[C@@H](C(=O)N[C@@H](CCSC)C(=O)N)NC(=O)CNC(=O)[C@H](CC1=CC=CC=C1)NC(=O)[C@H](CC2=CC=CC=C2)NC(=O)[C@H](CCC(=O)N)N	Active	Active	Non-active	Active	Active	Active-No
121955	CC1=NC(=O)C2=C(N1)C=CC(=C2)CN(CC#C)C3=CC=C(C=C3)C(=O)N[C@@H](CCC(=O)O)C(=O)O	Active	Active	Non-active	Active	Active	Active-No
121868	C1CCN(CC1)C2=CC3=C(C=C2)NC4=NC(=O)CN4C3	Active	Active	Non-active	Non-active	Active	Active-No
119584	CCOC1=CC(=C(C=C1C(=O)NCC2CN(CCO2)CC3=CC=C(C=C3)F)Cl)N	Active	Active	Non-active	Active	Active	Active-No
119461	CC(C)OC1=CC2=C(C=C1)C(=O)C3=C(O2)C=CC(=C3)C(=O)O	Active	Active	Non-active	Active	Active	Active-No
119343	C1C[C@H](N(C1)C(=O)[C@H](CCCN=C(N)N)NC(=O)[C@@H](CCCN=C(N)N)N)C(=O)N2C[C@@H](C[C@H]2C(=O)NCC(=O)N[C@@H](CC3=CC=CC=C3)C(=O)N[C@@H](CO)C(=O)N[C@H](CC4=CC=CC=C4)C(=O)N[C@@H](CC5=CC=CC=C5)C(=O)N[C@@H](CCCN=C(N)N)C(=O)O)O	Active	Active	Non-active	Active	Active	Active-No
119303	C1C[C@H](N(C1)C(=O)[C@H](CC2=CC=C(C=C2)O)N)C(=O)N[C@@H](CC3=CC=CC=C3)C(=O)N4CCC[C@H]4C(=O)N	Active	Active	Non-active	Active	Active	Active-No
119054	[C@@H]1([C@@H]([C@H]([C@H]2[C@@H]([C@@H]1O)O2)O)O)O	Active	Active	Non-active	Non-active	Active	Active-No
119031	CC(C)C[C@H]([C@@H](C(=O)NO)O)C(=O)N[C@H](C(=O)NC)C(C)(C)C	Active	Active	Non-active	Non-active	Non-active	Active-No
115239	CS(=O)(=O)C1=CC=C(C=C1)N2C(=CC(=N2)C(F)(F)F)C3=CC=C(C=C3)F	Active	Active	Non-active	Active	Active	Active-No
115141	CC1=CC2=C(C=C1)N3CCNC4C3=C2CCC4	Active	Active	Non-active	Non-active	Active	Active-No
114810	CC1=C(N2C(=C(C(=O)N2C1=O)C)CBr)C	Active	Active	Non-active	Non-active	Active	Active-No
108220	CN1[C@H]2CC[C@@H]1[C@H]([C@H](C2)C3=CC=C(C=C3)I)C(=O)OC	Active	Active	Non-active	Non-active	Active	Active-No
108137	CC1=C(N2C=CC=C(C2=N1)OCC3=CC=CC=C3)CC#N	Active	Active	Non-active	Non-active	Active	Active-No
108040	C1CN=C(N1)NC2=CC=C(C=C2)C(=O)OC3=CC4=C(C=C3)C=C(C=C4)C(=N)N	Active	Active	Non-active	Active	Active	Active-No
107992	C1CN(CCN1)C2=CN=CC(=N2)Cl	Active	Active	Non-active	Non-active	Active	Active-No
107968	CSC(=NCCC[C@@H](C(=O)O)N)N	Active	Active	Non-active	Non-active	Active	Active-No
107805	CN(C)CCNC(=O)C1=CC=CC2=CC3=CC=CC=C3N=C21	Active	Active	Non-active	Non-active	Active	Active-No
107706	CC(C)(C)C(=O)OC1=CC=C(C=C1)S(=O)(=O)NC2=CC=CC=C2C(=O)NCC(=O)O	Active	Active	Non-active	Active	Active	Active-No
107641	CCC(C1=CC=C(C=C1)N2CC3=CC=CC=C3C2=O)C(=O)O	Active	Active	Non-active	Active	Active	Active-No
104895	CCCCCCC(C)(C)C1=CC(=C(C=C1)[C@@H]2C[C@@H](CC[C@H]2CCCO)O)O	Active	Active	Non-active	Active	Active	Active-No
104794	C[C@]12CC[C@H]3[C@H]([C@@H]1CC[C@@H]2NCCCCCCN4C(=O)C=CC4=O)CCC5=C3C=CC(=C5)OC	Active	Active	Non-active	Active	Active	Active-No
99562	CN1C=NC2=C1C(=O)N(C(=O)N2C)CC#C	Active	Active	Non-active	Non-active	Active	Active-No
97536	CCCCCCSC[C@@H](C(=O)NCC(=O)O)NC(=O)CC[C@@H](C(=O)O)N	Active	Active	Non-active	Active	Active	Active-No
94701	CC[C@H](C)[C@@H](C(=O)N1CCC[C@H]1C(=O)N[C@@H]([C@@H](C)CC)C(=O)O)N	Active	Active	Non-active	Active	Active	Active-No
93368	C1=C(C=C2C3=C1C(=O)N(C(=O)C3=CC(=C2N)S(=O)(=O)O)NC(=O)NN)S(=O)(=O)O	Active	Active	Non-active	Active	Active	Active-No
92381	CN1C[C@@H]([C@H]([C@@H]([C@H]1CO)O)O)O	Active	Active	Non-active	Non-active	Active	Active-No
91636	C1[C@@H]2[C@H]([C@H]([C@@H](O2)N3C4=C(C(=NC=N4)N)N=C3SC5=CC=C(C=C5)Cl)O)OP(=O)(O1)O	Active	Active	Non-active	Active	Non-active	Active-No
91486	CCCCCCCCCCCCCCC[C@H]([C@H](CO)N)O	Active	Active	Non-active	Active	Active	Active-No
91452	CCNC(C)CC1=CC(=CC=C1)C(F)(F)F	Active	Active	Non-active	Non-active	Active	Active-No
84029	CC[C@@H]1[C@@]([C@@H]([C@H](C(=O)[C@@H](C[C@@]([C@@H]([C@H]([C@@H]([C@H](C(=O)O1)C)O[C@H]2C[C@@]([C@H]([C@@H](O2)C)O)(C)OC)C)O[C@H]3[C@@H]([C@H](C[C@H](O3)C)N(C)C)O)(C)OC)C)C)O)(C)O	Active	Active	Active	Active	Non-active	Active
83511	C1=C2C(=C(C(=C1Br)O)Br)OC3=C(C(=C(C=C3C24C5=C(C(=C(C(=C5Cl)Cl)Cl)Cl)C(=O)O4)Br)O)Br	Active	Active	Non-active	Active	Active	Active-No
80289	C1=CC=C(C=C1)C(=N)N	Active	Active	Non-active	Non-active	Active	Active-No
77993	CN1CCC[C@@H]1CC2=CNC3=C2C=C(C=C3)CCS(=O)(=O)C4=CC=CC=C4	Active	Active	Non-active	Non-active	Active	Active-No
74990	CCC1=C2C=C(C=CC2=NC3=C1CN4C3=CC5=C(C4=O)COC(=O)[C@@]5(CC)O)OC(=O)N6CCC(CC6)N7CCCCC7	Active	Active	Non-active	Active	Non-active	Active-No
73680	C1=C(N=C(S1)[C@H]2[C@@H]([C@@H]([C@H](O2)COP(=O)(O)OP(=O)(O)OC[C@@H]3[C@H]([C@H]([C@@H](O3)N4C=NC5=C4N=CN=C5N)O)O)O)O)C(=O)N	Active	Active	Non-active	Active	Active	Active-No
72968	C1=C([C@H]([C@H]([C@@H]1N2C=NC3=C2N=CN=C3N)O)O)CO	Active	Active	Non-active	Active	Non-active	Active-No
72495	C[C@H](CC[C@H](C(C)C)OS(=O)(=O)O)[C@H]1CC[C@@H]2[C@@]1(CC[C@H]3[C@H]2[C@@H](C[C@@H]4[C@@]3(CC[C@@H](C4)NCCCNCCCCN)C)O)C	Active	Active	Non-active	Active	Non-active	Active-No
72303	C=CCC1=CC(=C(C=C1)O)C2=CC(=C(C=C2)O)CC=C	Active	Active	Non-active	Non-active	Active	Active-No
71987	COC1=CC2=C(C=C1)NC=C2C(CN)C(=O)OC	Active	Active	Non-active	Non-active	Active	Active-No
71306	CC(C)C1C(=O)NC(CSSCC(C(=O)NC(C(=O)NC(C(=O)NC(C(=O)N1)CCCCN)CC2=CNC3=CC=CC=C32)CC4=CC=C(C=C4)O)NC(=O)C(CC5=CC=CC=C5)N)C(=O)NC(CC6=CNC7=CC=CC=C76)C(=O)N	Active	Active	Non-active	Active	Non-active	Active-No
71246	CS(=O)(=O)NC1=C(C=C2C(=C1)CCC2=O)OC3=C(C=C(C=C3)F)F	Active	Active	Non-active	Active	Active	Active-No
68861	C[C@]12CCC3=C4CCC(=O)C=C4CC[C@H]3[C@@H]1CC[C@]2(CC#N)O	Active	Active	Non-active	Active	Active	Active-No
68760	COC1=CC(=CC(=C1Br)OC)CC2=CN=C(N=C2N)N	Active	Active	Non-active	Non-active	Active	Active-No
68589	C1=CC(=CC=C1COC(CN2C=CN=C2)C3=C(C=C(C=C3)Cl)Cl)Cl	Active	Active	Non-active	Active	Active	Active-No
67149	C1=CC(=CC=C1NCC(=O)O)O	Active	Active	Non-active	Non-active	Active	Active-No
54685734	CC1(C2CC3C(C(=O)C(=C(C3(C(=O)C2=C(C4=C1C=CC=C4O)O)O)O)C(=O)N)N(C)C)O	Active	Active	Active	Active	Non-active	Active
54682505	C1=CC=C(C=C1)OC2=CC=CC(=C2)C3=C(C4=C(C=C(C=C4)Cl)NC3=O)O	Active	Active	Non-active	Active	Active	Active-No
54678496	CC1=CC=C(N1)C(=O)OC2C(C(OC(C2OC)(C)C)OC3=C(C4=C(C=C3)C(=C(C(=O)O4)NC(=O)C5=CNC(=C5C)C(=O)NC6=C(C7=C(C(=C(C=C7)OC8C(C(C(C(O8)(C)C)OC)OC(=O)C9=CC=C(N9)C)O)C)OC6=O)O)O)C)O	Active	Active	Non-active	Active	Non-active	Active
54677470	CC1=CN=C(S1)NC(=O)C2=C(C3=CC=CC=C3S(=O)(=O)N2C)O	Active	Active	Non-active	Active	Active	Active-No
54675761	CC(=O)C1=C(C2C3C(CC4=C5C3=CNC5=CC=C4)C(N2C1=O)(C)C)O	Active	Active	Non-active	Active	Active	Active-No
54606084	C1=CC2=C3C(=C(C=C2S(=O)(=O)O)S(=O)(=O)O)C=CC4=C(C=C(C1=C43)O)S(=O)(=O)O	Active	Active	Non-active	Active	Active	Active-No
54598306	C/C(=N\N=C(N)N)/C=N/N=C(N)N	Active	Active	Non-active	Non-active	Active	Active-No
49800025	C[C@H](CC1=CC=C(C=C1)OC)NC[C@@H](C2=CC(=C(C=C2)O)NC=O)O	Active	Active	Non-active	Active	Active	Active-No
46874793	CSC[C@@H]1[C@H]([C@H](C(O1)N2C=NC3=C2N=CN=C3N)O)O	Active	Active	Non-active	Active	Active	Active-No
44403745	C[C@]12C=CC3=C4CCC(=O)C=C4CCC3C1CC[C@@H]2O	Active	Active	Non-active	Active	Active	Active-No
45479729	C1CC2C(C1)C3CC2CC3OC(=S)S	Active	Active	Non-active	Non-active	Active	Active-No
44276203	CCC[C@](C)(C1C[C@@]23C=C[C@@]1([C@H]4[C@@]25CCN([C@@H]3CC6=C5C(=C(C=C6)O)O4)C)OC)O	Active	Active	Non-active	Non-active	Active	Active-No
42628599	CC1CCC2(CCCCO2)O[C@@H]1C(C)CC([C@@H]3C(=C)C([C@H]4[C@H](O3)CC[C@]5(O4)CC[C@@H](O5)/C=C/C(C)[C@@H]6CC(=CC7(O6)C(CC[C@H](O7)C[C@](C)(C(=O)O)O)O)C)O)O	Active	Active	Non-active	Active	Non-active	Active-No
24840146	C1CC[C@]2([C@H]3CC4=C([C@]2(C1)CCN3CC5CCC5)C=C(C=C4)O)O	Active	Active	Non-active	Active	Active	Active-No
24180972	CC(CCCN(CCCl)CCCl)NC1=C2C=C(C=CC2=NC3=C1C=CC(=C3)Cl)OC	Active	Active	Non-active	Non-active	Active	Active-No
24978504	C1=CC=C(C(=C1)N)NC(=O)C2=CC=C(C=C2)CNC3=NC=CC(=N3)C4=CN=CC=C4	Active	Active	Non-active	Active	Active	Active-No
22313112	CN(C)C/C=C(/C1=CC=C(C=C1)Br)\C2=CN=CC=C2	Active	Active	Non-active	Non-active	Active	Active-No
23699788	C[C@@]1([C@@H](N2C(S1(=O)=O)CC2=O)C(=O)[O-])CN3C=CN=N3	Active	Active	Non-active	Active	Active	Active-No
23672955	C[C@H]1[C@@H]2CC[C@]3([C@H]([C@]2(CC[C@H]1O)C)[C@@H](C[C@@H]\4[C@@]3(C[C@@H](/C4=C(/CCC=C(C)C)\C(=O)[O-])OC(=O)C)C)O)C	Active	Active	Active	Active	Active	Active
23670298	OC\C=C1/O[C@@H]2CC(=O)N2[C@H]1C(O)=O	Active	Active	Active	Non-active	Non-active	Active
23665411	CN1C(CC(O)=O)=CC=C1C(=O)C1=CC=C(C)C=C1	Active	Active	Non-active	Non-active	Active	Active-No
23663959	CC1=C(Cl)C(NC2=CC=CC=C2C(O)=O)=C(Cl)C=C1	Active	Active	Non-active	Non-active	Active	Active-No
23663403	N[C@@H](CSCCCC\C=C(/NC(=O)[C@H]1CC1(C)C)C(=O)O)C(=O)O	Active	Active	Active	Non-active	Non-active	Active-No
20496538	C1=CC=C(C=C1)NC2=CC=CC3=C2C(=CC=C3)OS(=O)(=O)O	Active	Active	Non-active	Non-active	Active	Active-No
20835957	NNC(=O)N1C(=O)C2=CC(=C(N)C3=CC(=CC(C1=O)=C23)S(O)(=O)=O)S(O)(=O)=O	Active	Active	Non-active	Active	Active	Active-No
18004026	CC1=CC=C(C=C1)C2=C(N3C=C(C=CC3=N2)C)CC(=O)N(C)C	Active	Active	Non-active	Non-active	Active	Active-No
18529465	CC1C(C(C(O1)OC2C(C(C(C(C2O)O)N=C(N)N)O)N=C(N)N)OC3C(C(C(C(O3)CO)O)O)NC)(C=O)O	Active	Active	Active	Active	Non-active	Active
14679811	CC1(C(C(=O)NCC(=O)NC(C(=O)NC(C(SS1)(C)C)C(=O)O)CC2=CC=CC=C2)NC(=O)C(CC3=CC=C(C=C3)O)N)C	Active	Active	Non-active	Active	Active	Active-No
16760523	C1=C(C2=C(N1[C@H]3C([C@H]([C@H](O3)CO)O)O)N=CN=C2N)I	Active	Active	Non-active	Active	Active	Active-No
11969465	C[C@]12CC[C@@H](C[C@]1(CC[C@@H]3[C@@H]2CC[C@]4([C@]35[C@H](O5)C[C@@H]4C6=COC(=O)C=C6)C)O)O	Active	Active	Non-active	Active	Active	Active-No
11957542	CC(C)C[C@@H](C(=O)NCCCCN=C(N)N)NC(=O)C1C(O1)C(=O)O	Active	Active	Non-active	Active	Active	Active-No
16219783	CCCCCCCCCCCCC/C=C/[C@H]([C@H](CO)NC(=O)CCCCCNC1=CC=C(C2=NON=C12)[N+](=O)[O-])O	Active	Active	Non-active	Active	Active	Active-No
11450633	CN1C(=O)C=C(N(C1=O)CC2=CC=CC=C2C#N)N3CCC[C@H](C3)N	Active	Active	Non-active	Active	Active	Active-No
11199915	CC(C)[C@@H](C(=O)NC(CC1=CC=CC=C1)C=O)NC(=O)OCC2=CC=CC=C2	Active	Active	Non-active	Non-active	Active	Active-No
11628205	CN1C=C(C2=CC=CC=C21)C3=C(C(=O)NC3=O)C4=CN(C5=CC=CC=C54)CCCSC(=N)N	Active	Active	Non-active	Active	Active	Active-No
10130510	CC(C)(C)[C@@H](C(=O)N1CCC[C@H]1C#N)N	Active	Active	Non-active	Non-active	Active	Active-No
10041070	C[C@]12C=CC3=C4CCC(=O)C=C4CC[C@H]3[C@@H]1CC[C@]2(CC=C)O	Active	Active	Non-active	Active	Active	Active-No
9929799	COC(=O)C1=CC=CC=C1C2=C3C=CC(=N)C=C3OC4=C2C=CC(=C4)N	Active	Active	Non-active	Active	Active	Active-No
9912089	CC(CC1=CC=C(C=C1)OC)NCC(C2=CC(=C(C=C2)O)NC=O)O	Active	Active	Non-active	Active	Active	Active-No
9871419	CCCSC1=NC2=C(C(=N1)N[C@@H]3C[C@H]3C4=CC(=C(C=C4)F)F)N=NN2[C@@H]5C[C@@H]([C@H]([C@H]5O)O)OCCO	Active	Active	Non-active	Active	Non-active	Active
9854012	CSCCNC1=NC(=NC2=C1N=CN2[C@H]3[C@@H]([C@@H]([C@H](O3)COP(=O)(O)OP(=O)(C(P(=O)(O)O)(Cl)Cl)O)O)O)SCCC(F)(F)F	Active	Active	Non-active	Active	Active	Active
9828429	C[C@H]1[C@@H]([C@H]([C@H]([C@@H](O1)O[C@H]2CC[C@@]3(C4CC[C@@]5([C@H](CC[C@@]5(C4CCC3=C2)O)C6=COC(=O)C=C6)C)C)O)O)O	Active	Active	Non-active	Active	Active	Active-No
10342051	CC(C)[C@@H](C1=CC=C(C=C1)Cl)C(=O)O[C@H](C#N)C2=CC(=CC=C2)OC3=CC=CC=C3	Active	Active	Non-active	Active	Active	Active-No
9796290	C1C[C@H](N(C1)C(=O)CNCCNC2=NC=C(C=C2)C#N)C#N	Active	Active	Non-active	Active	Active	Active-No
9576789	C1C/C(=N\N=C(N)N)/C2=C1C(=CC=C2)C(=N)N	Active	Active	Non-active	Active	Active	Active-No
6918537	C1C[C@H](N(C1)C(=O)CNC23CC4CC(C2)CC(C4)(C3)O)C#N	Active	Active	Non-active	Active	Active	Active-No
6918328	CC[C@H](C)[C@H]1C(=O)N2CCCC[C@@H]2C(=O)N[C@H](C(=O)N[C@H](C(=O)N1)CC3=CN(C4=CC=CC=C43)OC)CCCCCC(=O)CC	Active	Active	Non-active	Active	Active	Active-No
6918030	C1CCN(CC1)[C@H]2[C@H](C[C@@H]([C@@H]2CC/C=C\CCC(=O)O)OCC3=CC=C(C=C3)C4=CC=CC=C4)O	Active	Active	Non-active	Active	Active	Active-No
6914489	CN1C=C(N=N1)/C=C/2\[C@@H]3N(C2=O)C(=CS3)C(=O)O	Active	Active	Non-active	Active	Non-active	Active
6713988	CC1[C@@H]([C@@H](C([C@@H](O1)O[C@H]2CC[C@@]3(C4CC[C@@]5([C@H](CC[C@@]5(C4CCC3=C2)O)C6=COC(=O)C=C6)C)C)O)O)O	Active	Active	Non-active	Active	Active	Active-No
6708701	C[C@]12C3CCC([C@]1(C(=O)OC2=O)C)O3	Active	Active	Non-active	Non-active	Active	Active-No
6603320	CC[C@H]1CN2CCC3=CC(=C(C=C3[C@@H]2C[C@@H]1C[C@@H]4C5=CC(=C(C=C5CCN4)OC)OC)OC)OC	Active	Active	Non-active	Active	Active	Active-No
6102351	C[C@@H]1CC[C@]2(CCCCO2)O[C@@H]1[C@@H](C)C[C@@H]([C@@H]3C(=C)[C@H]([C@H]4[C@H](O3)CC[C@]5(O4)CC[C@@H](O5)/C=C/[C@@H](C)[C@@H]6CC(=C[C@@]7(O6)C(CC[C@H](O7)C[C@](C)(C(=O)O)O)O)C)O)O	Active	Active	Non-active	Active	Active	Active-No
5941457	CCOC1=CC(=CC(=C1O)CSC2=CC=CC=C2)/C=C(\C#N)/C(=O)N	Active	Active	Non-active	Active	Active	Active-No
5702291	CN1CC[C@]23[C@@H]4[C@@H](C=CC2[C@H]1CC5=C3C(=C(C=C5)O)O4)O	Active	Active	Non-active	Active	Active	Active-No
5702237	CC(C(C1=CC(=CC=C1)O)O)N	Active	Active	Non-active	Non-active	Active	Active-No
5702161	CC(CC1=CC=C(C=C1)O)NCC(C2=CC(=CC(=C2)O)O)O	Active	Active	Non-active	Active	Active	Active-No
5702091	C1[C@H]([C@@H]([C@H]([C@@H]([C@H]1N)OC2[C@@H]([C@H]([C@@H]([C@H](O2)CN)O)O)N)OC3[C@@H]([C@@H]([C@H](O3)CO)O[C@@H]4[C@@H]([C@H]([C@@H]([C@@H](O4)CN)O)O)N)O)O)N	Active	Active	Active	Active	Non-active	Active
5702063	C1=CC(=C(C(=C1)Cl)/C=N/N=C(N)N)Cl	Active	Active	Non-active	Non-active	Active	Active-No
5702041	C[C@@H]1[C@H]([C@H](C[C@@H](O1)O[C@@H]2[C@H](O[C@H](C[C@@H]2O)O[C@@H]3[C@H](O[C@H](C[C@@H]3O)O[C@H]4CC[C@]5([C@@H](C4)CCC6C5CC[C@]7([C@@]6(CC[C@@H]7C8=CC(=O)OC8)O)C)C)C)C)O)O	Active	Active	Non-active	Active	Active	Active-No
4990817	C1=CC=C(C=C1)NC(=O)C2C(=O)NC(=S)NC2=O	Active	Active	Non-active	Non-active	Active	Active-No
6440895	C[C@H](CCCC[C@@H]1[C@H](C(=O)O1)CO)C/C(=C/C(=C/C(=O)O)/C)/C	Active	Active	Active	Non-active	Non-active	Active-No
6438354	CC(=O)N(C/C=C/C1=CC(=CC=C1)OC2=CC=CC=C2)O	Active	Active	Non-active	Non-active	Active	Active-No
6438166	CCCCCCCCCCCCC/C=C/[C@@H]([C@@H](CO)N(C)C)O	Active	Active	Non-active	Non-active	Active	Active-No
6437872	CNC/C=C(\C1=CC=C(C=C1)Br)/C2=CN=CC=C2	Active	Active	Non-active	Non-active	Active	Active-No
6437368	CC1=C(C(CCC1)(C)C)CC/C(=C/CCC2=CC[C@@H](O[C@H]2O)C3=CC(=O)O[C@H]3O)/C	Active	Active	Non-active	Active	Active	Active-No
6436013	CN(C/C=C\CN)C[C@@H]1[C@H]([C@H]([C@@H](O1)N2C=NC3=C2N=CN=C3N)O)O	Active	Active	Non-active	Active	Non-active	Active
6434259	C1[C@@H]([C@@H](C([C@@H]1O)/C=C/[C@H](COC2=CC(=CC=C2)Cl)O)C/C=C\CCCC(=O)O)O	Active	Active	Non-active	Active	Active	Active-No
6420034	CC1(COC(C(C1NC)O)OC2C(CC(C(C2O)OC3C(CC=C(O3)CN)N)N)N)O	Active	Active	Active	Active	Non-active	Active
6419973	C1[C@@H](O[C@@H](C1O)CO)N2C=C(C(=O)NC2=O)I	Active	Active	Non-active	Non-active	Active	Active-No
6419884	CCC[C@@H]1C[C@H](N(C1)C)C(=O)N[C@@H](C2[C@@H]([C@@H]([C@H]([C@H](O2)SC)O)O)O)[C@H](C)Cl	Active	Active	Non-active	Active	Active	Active-No
6398761	C[C@@H]([C@H]1CC[C@@H]\2[C@@]1(CCC/C2=C\C=C/3\C[C@H](C[C@@H](C3=C)O)O)C)OCCC(C)(C)O	Active	Active	Non-active	Non-active	Non-active	Active-No
6364669	C[C@H]1CCC/C=C/C2C[C@@H](CC2[C@@H](/C=C/C(=O)O1)O)O	Active	Active	Active	Non-active	Active	Active
6324648	CS(=O)(=O)N[C@@H](CCCCN)C(=O)NC[C@H](CC1(CCCC1)C(=O)N[C@@H](CC2=CC=C(C=C2)O)C(=O)O)C(=O)O	Active	Active	Non-active	Active	Non-active	Active-No
4432690	CC1C(C(C(C(O1)OC2C(OC(C(C2O)O)OC3C(OC(C(C3O)O)O)CO)CO)O)O)NC4C=C(C(C(C4O)O)O)CO	Active	Active	Non-active	Active	Active	Active
4291056	CC(C)CC(C(=O)NC(C(C)O)C(=O)O)NC(=O)C(CC1=CC=CC=C1)NC(=O)CNC(=O)C(CO)NC(=O)C(CC2=CC=C(C=C2)O)N	Active	Active	Non-active	Active	Active	Active-No
5491656	CN1CCN(CC1)C2=CC3=C(C=C2)N=C(N3)C4=CC5=C(C=C4)NC(=C6C=CC(=O)C=C6)N5	Active	Active	Non-active	Active	Active	Active-No
5487262	CC1=C2C3=C4C(=C(C(=O)C(=O)C5=CC(=C6C(=CC(=C(C6=C54)C3=C(C(=C2C(=O)C)OC)O)O)OC)OC)OC)C1	Active	Active	Non-active	Active	Non-active	Active
5485199	C[C@H](C(=O)N[C@@H](CC1=CC=CC=C1)C(=O)NCC(=O)N[C@@H](CC2=CC=C(C=C2)O)C(=O)N3CCC[C@H]3C(=O)N[C@@H](CO)C(=O)N)NC(=O)[C@H](CC4=CC=C(C=C4)O)N	Active	Active	Non-active	Active	Active	Active-No
5476249	CC1C/C=C/C2C(C(=C)C(C3C2(C(/C=C\C(C1=O)(C)O)OC(=O)C)C(=O)NC3CC4=CC=CC=C4)C)O	Active	Active	Non-active	Active	Active	Active-No
5468826	CC1CC[C@]2(CCCCO2)OC1[C@@H](C)CC(C3C(=C)[C@H](C4[C@H](O3)CCC5(O4)CCC(O5)/C=C/[C@@H](C)C6CC(=CC7(O6)C(CC[C@H](O7)C[C@@](C)(C(=O)O)O)O)C)O)O	Active	Active	Non-active	Active	Non-active	Active-No
5464201	CC[C@H](C)[C@@H](C(=O)NCC1=CC=CC=N1)NC(=O)[C@@H](C[C@@H]([C@H](CC(C)C)NC(=O)[C@H](CC2=CN=CN2)N(C)C(=O)[C@H](CC3=CC=CC=C3)NC(=O)[C@@H]4CCCN4C(=O)OC(C)(C)C)O)C(C)C	Active	Active	Non-active	Active	Non-active	Active-No
5464027	CN1CC[C@]23CCCC[C@H]2[C@H]1CC4=C3C=C(C=C4)O	Active	Active	Non-active	Non-active	Active	Active-No
5462350	CN1CC[C@]23[C@@H]4C(=O)CC[C@]2([C@H]1CC5=C3C(=C(C=C5)OC)O4)O	Active	Active	Non-active	Active	Active	Active-No
5458403	CC1(COC(C(C1NC)O)OC2C(CC(C(C2O)OC3C(CC=C(O3)CN)N)N)N)O.OS(=O)(=O)O	Active	Active	Active	Active	Non-active	Active
5362422	CC(C)C[C@H]([C@H](CSC1=CC=CS1)C(=O)NO)C(=O)N[C@@H](CC2=CC=CC=C2)C(=O)NC	Active	Active	Non-active	Active	Active	Active-No
5360852	C1=CC(=O)C=CC1=NNC2=CC(=O)NC(=O)N2	Active	Active	Non-active	Non-active	Active	Active-No
5359363	COC1=C/C(=C\NNC(=O)C2=CC=NC=C2)/C=CC1=O	Active	Active	Non-active	Non-active	Active	Active-No
5359013	CC1CC2C(O2)/C=C\C=C\C(=O)CC3=C(C(=CC(=C3Cl)O)O)C(=O)O1	Active	Active	Non-active	Active	Active	Active-No
5354033	C1=CC=C(C(=C1)N)S/C(=C(\C#N)/C(=C(/N)\SC2=CC=CC=C2N)/C#N)/N	Active	Active	Non-active	Active	Active	Active-No
5353446	CC1CCC/C=C\C2CC(CC2C(/C=C\C(=O)O1)O)O	Active	Active	Active	Non-active	Non-active	Active
5328552	C1=CC(=C(C=C1O)/C=C/NC=O)O	Active	Active	Non-active	Non-active	Active	Active-No
5311501	CC1=C(C2=C3N1[C@@H](COC3=CC=C2)CN4CCOCC4)C(=O)C5=CC=CC6=CC=CC=C65	Active	Active	Non-active	Active	Active	Active-No
5311302	CNC1=NC=NC2=C1N=CN2[C@H]1C[C@H](OP(O)(O)=O)[C@@H](COP(O)(O)=O)O1	Active	Active	Non-active	Active	Active	Active-No
5311081	C1C[C@H](N(C1)C(=O)[C@H](CC2=CC=C(C=C2)O)N)C(=O)N[C@@H](CC3=CC=CC=C3)C(=O)N[C@@H](CC4=CC=CC=C4)C(=O)N	Active	Active	Non-active	Active	Active	Active-No
5311053	C1[C@@H]([C@@H]([C@H]([C@@H]1O)/C=C/[C@H](COC2=CC(=CC=C2)Cl)O)C/C=C\CCCC(=O)O)O	Active	Active	Non-active	Active	Active	Active-No
5289019	C[C@H]1[C@@H]([C@@]([C@H]([C@@H](O1)O[C@H]2C[C@]([C@@H](C3=C2C(=C4C(=C3)C(=O)C5=C6C(=CC(=C5C4=O)O)[C@@]7([C@@H]([C@H]([C@@H]([C@H](O6)O7)O)N(C)C)O)C)O)C(=O)OC)(C)O)OC)(C)OC)OC	Active	Active	Non-active	Active	Non-active	Active
5284613	C[C@H]1[C@@H]([C@H]([C@H]([C@@H](O1)O[C@H]2CC[C@@]3([C@H]4CC[C@@]5([C@H](CC[C@@]5([C@@H]4CCC3=C2)O)C6=COC(=O)C=C6)C)C)O)O)O	Active	Active	Non-active	Active	Active	Active-No
5284569	CN1CC[C@]23[C@@H]4[C@H]1CC5=C2C(=C(C=C5)OC)O[C@H]3C(=O)CC4	Active	Active	Non-active	Active	Active	Active-No
5284537	CC(=O)[C@]1(CC[C@@H]2[C@@]1(CC[C@H]3[C@H]2C=C(C4=CC(=O)[C@@H]5C[C@@H]5[C@]34C)Cl)C)O	Active	Active	Non-active	Active	Active	Active-No
5284512	C[C@@H]1[C@H]([C@H](C[C@@H](O1)O[C@@H]2[C@H](O[C@H](C[C@@H]2O)O[C@@H]3[C@H](O[C@H](C[C@@H]3O)O[C@H]4CC[C@]5([C@@H](C4)CC[C@@H]6[C@@H]5CC[C@]7([C@@]6(CC[C@@H]7C8=CC(=O)OC8)O)C)C)C)C)OC(=O)C)O	Active	Active	Non-active	Active	Active	Active-No
5284373	CC[C@H]1C(=O)N(CC(=O)N([C@H](C(=O)N[C@H](C(=O)N([C@H](C(=O)N[C@H](C(=O)N[C@@H](C(=O)N([C@H](C(=O)N([C@H](C(=O)N([C@H](C(=O)N([C@H](C(=O)N1)[C@@H]([C@H](C)C/C=C/C)O)C)C(C)C)C)CC(C)C)C)CC(C)C)C)C)C)CC(C)C)C)C(C)C)CC(C)C)C)C	Active	Active	Active	Active	Non-active	Active
5283121	CCCCC/C=C\C/C=C\C=C\C=C\[C@H]([C@H](CCCC(=O)O)O)SCC(C(=O)NCC(=O)O)NC(=O)CCC(C(=O)O)N	Active	Active	Non-active	Active	Active	Active-No
5282435	C1=CC(=C(C=C1Cl)C2=NC(=NC(=N2)N)N)Cl	Active	Active	Non-active	Non-active	Active	Active-No
5282381	CCCCC(C)(C/C=C/[C@H]1[C@@H](CC(=O)[C@@H]1CCCCCCC(=O)OC)O)O	Active	Active	Non-active	Active	Active	Active-No
5281969	CCCCC/C=C\C/C=C\C/C=C\C/C=C\CCCC(=O)NCCO	Active	Active	Non-active	Non-active	Active	Active-No
5281751	CC1=CC(=C2C3=C1C4=C5C(=C(C=C4CO)O)C(=O)C6=C(C=C(C7=C6C5=C3C8=C7C(=CC(=C8C2=O)O)O)O)O)O	Active	Active	Non-active	Active	Active	Active-No
5281437	C/C/1=C\CC/C(=C/[C@@H]2[C@@H](CC1)C(=C)C(=O)O2)/C	Active	Active	Non-active	Non-active	Active	Active-No
5280879	CCCCC/C=C\C/C=C\C=C\C=C\[C@H]([C@H](CCCC(=O)O)O)SC[C@@H](C(=O)O)N	Active	Active	Non-active	Active	Active	Active-No
5280749	CCCCC/C=C\C/C=C\C=C\C=C\[C@H]([C@H](CCCC(=O)O)O)SCC(C(=O)O)N	Active	Active	Non-active	Active	Active	Active-No
5280492	CCCCC/C=C\C[C@H](/C=C/C=C/C=C\[C@H](CCCC(=O)O)O)O	Active	Active	Non-active	Non-active	Active	Active-No
5280378	COC1=CC=C(C=C1)C2=COC3=C(C2=O)C=CC(=C3)O	Active	Active	Non-active	Active	Active	Active-No
3683393	CC1=CC(=O)OC2=C1C=CC(=C2)OC3C(C(C(C(O3)C(=O)O)O)O)O	Active	Active	Non-active	Active	Active	Active-No
4656409	CN(C1CCC2(CCCO2)CC1N3CCCC3)C(=O)CC4=CC=CC=C4	Active	Active	Non-active	Active	Active	Active-No
3086671	C[C@H](C#CC1=CC=C(S1)CC2=CC=C(C=C2)F)N(C(=O)N)O	Active	Active	Non-active	Non-active	Active	Active-No
3080926	C1CN=C(N1)C2=CC3=CC=CC=C3O2	Active	Active	Non-active	Non-active	Active	Active-No
3037943	C(=S)(N)NN	Active	Active	Non-active	Active	Active	Active-No
3034010	CCCCCCCCCCC[C@@H](C[C@H]1[C@@H](C(=O)O1)CCCCCC)OC(=O)[C@H](CC(C)C)NC=O	Active	Active	Non-active	Active	Non-active	Active-No
3033053	C[C@]12CCCCC[C@H]([C@@H]1N)CC3=C2C=C(C=C3)O	Active	Active	Non-active	Non-active	Active	Active-No
3010927	CC(=C)[C@@H]1CC[C@]2(C1C3CCC4[C@]5(CC[C@@H](C(C5CC[C@]4([C@@]3(CC2)C)C)(C)C)O)C)C(=O)O	Active	Active	Non-active	Non-active	Active	Active-No
3000671	C1=CC=C(C=C1)NC(=O)C2=C(NC(=S)NC2=O)O	Active	Active	Non-active	Non-active	Active	Active-No
4183640	C1=CC(=CC=C1C2=COC3=C(C2=O)C=CC(=C3)OC4C(C(C(C(O4)CO)O)O)O)O	Active	Active	Non-active	Active	Active	Active-No
2724371	C1=CC=C(C=C1)C(=O)NC(CCCN=C(N)N)C(=O)NC2=CC=C(C=C2)[N+](=O)[O-]	Active	Active	Non-active	Active	Active	Active-No
1549120	C/C(=C\C1=CC=CC=C1)/C=C\2/C(=O)N(C(=S)S2)CC(=O)O	Active	Active	Non-active	Active	Active	Active-No
969516	COC1=C(C=CC(=C1)/C=C/C(=O)CC(=O)/C=C/C2=CC(=C(C=C2)O)OC)O	Active	Active	Non-active	Active	Active	Active-No
66359	CC(=O)O[C@H]1CC[C@@H]2[C@@]1(C=CC3=C4CCC(=O)C=C4CC[C@@H]23)C	Active	Active	Non-active	Active	Active	Active-No
65906	CN(C1CCN(CC1)C2=NC3=CC=CC=C3N2CC4=CC=C(C=C4)F)C5=NC=CC(=O)N5	Active	Active	Non-active	Non-active	Active	Active-No
65526	C1=CC(=CC=C1CN)C(=O)O	Active	Active	Non-active	Non-active	Active	Active-No
65407	C1=CC(=CC=C1CSC2=NC=NC3=C2N=CN3[C@H]4[C@@H]([C@@H]([C@H](O4)CO)O)O)[N+](=O)[O-]	Active	Active	Non-active	Active	Active	Active-No
65335	C1CN(CC2=C1SC=C2)CC3=CC=CC=C3Cl	Active	Active	Non-active	Non-active	Active	Active-No
65309	CC(=O)N[C@@H]1[C@H](C=C(O[C@H]1[C@@H]([C@@H](CO)O)O)C(=O)O)O	Active	Active	Non-active	Active	Non-active	Active-No
65181	C1=CC(=C(C2=C1NC=C2O[C@H]3[C@@H]([C@H]([C@H]([C@H](O3)CO)O)O)O)Cl)Br	Active	Active	Non-active	Active	Active	Active-No
65077	CN(C)C1=CC=CC2=C1C=CC=C2S(=O)(=O)N	Active	Active	Non-active	Non-active	Active	Active-No
64982	C1=CC=C(C=C1)C2=CC(=O)C3=C(C(=C(C=C3O2)O[C@H]4[C@@H]([C@H]([C@@H]([C@H](O4)C(=O)O)O)O)O)O)O	Active	Active	Non-active	Active	Active	Active-No
64945	C[C@@H]1CC[C@@]2(CC[C@@]3(C(=CC[C@H]4[C@]3(CC[C@@H]5[C@@]4(CC[C@@H](C5(C)C)O)C)C)[C@@H]2[C@H]1C)C)C(=O)O	Active	Active	Non-active	Non-active	Active	Active-No
64747	CC(C(O)=O)C1=CC(OC2=CC=CC=C2)=CC=C1	Active	Active	Non-active	Non-active	Active	Active-No
63013	CN(C)C[C@H]1CCCC[C@@]1(C2=CC(=CC=C2)OC)O	Active	Active	Non-active	Non-active	Active	Active-No
62935	C1CN(CCN1CCCN2C(=O)N3C=CC=CC3=N2)C4=CC(=CC=C4)Cl	Active	Active	Non-active	Non-active	Active	Active-No
62891	C1C[C@H](C(NC1)CC(=O)CN2C=NC3=CC(=C(C=C3C2=O)Cl)Br)O	Active	Active	Non-active	Active	Active	Active-No
62314	CCCC[C@H](C)[C@H]([C@@H](C[C@H](C)C[C@H](CCCC[C@H](C[C@@H]([C@H](C)N)O)O)O)OC(=O)C[C@H](CC(=O)O)C(=O)O)OC(=O)C[C@H](CC(=O)O)C(=O)O	Active	Active	Non-active	Active	Non-active	Active
62065	CC(CC1=CC(=C(C=C1OC)Br)OC)N	Active	Active	Non-active	Non-active	Active	Active-No
60961	C1=NC2=C(C(=N1)N)N=CN2[C@H]3[C@@H]([C@@H]([C@H](O3)CO)O)O	Active	Active	Non-active	Active	Non-active	Active
60863	CC1=NC(=O)C2=C(N1)C=CC3=C2C=C(C=C3)CNC4=CC5=C(C=C4)C(=O)N(C5)[C@@H](CCC(=O)O)C(=O)O	Active	Active	Non-active	Active	Active	Active-No
60823	CC(C)C1=C(C(=C(N1CC[C@H](C[C@H](CC(=O)O)O)O)C2=CC=C(C=C2)F)C3=CC=CC=C3)C(=O)NC4=CC=CC=C4	Active	Active	Non-active	Active	Active	Active-No
60790	COC1=C(C=C(C=C1)CNCC(COC2=CC3=C(C=C2)NC(=O)C=C3)O)OC	Active	Active	Non-active	Active	Active	Active-No
60700	CC[C@@]1(C2=C(COC1=O)C(=O)N3CC4=C(C3=C2)N=C5C=CC(=C(C5=C4)CN(C)C)O)O	Active	Active	Non-active	Active	Active	Active-No
60606	COC(=O)[C@H](C1=CC=CC=C1Cl)N2CCC3=C(C2)C=CS3	Active	Active	Non-active	Non-active	Active	Active-No
60490	CC(C1=CC2=CC=CC=C2S1)N(C(=O)N)O	Active	Active	Non-active	Non-active	Active	Active-No
57946	C1=CSC(=C1)C(=O)C2C3=C(C=CC(=C3)Cl)N(C2=O)C(=O)N	Active	Active	Non-active	Active	Active	Active-No
56801	C1=CC=C(C=C1)CCCCOCCCCCCNCC(C2=CC(=C(C=C2)O)CO)O	Active	Active	Non-active	Active	Active	Active-No
55652	CN([C@H]1CC[C@@]2(CCCO2)C[C@@H]1N3CCCC3)C(=O)CC4=CC(=C(C=C4)Cl)Cl	Active	Active	Non-active	Active	Active	Active-No
55263	CCC1=C(NC(=O)N1)C(=O)C2=CC=NC=C2	Active	Active	Non-active	Non-active	Active	Active-No
54454	CCC(C)(C)C(=O)O[C@H]1C[C@H](C=C2[C@H]1[C@H]([C@H](C=C2)C)CC[C@@H]3C[C@H](CC(=O)O3)O)C	Active	Active	Non-active	Active	Active	Active
53802	C[C@@H]1[C@@H]([C@@H]([C@H]([C@H](O1)C2=C3C(=C(C=C2)O)C(=CC4=C3OC(=O)C5=CC(=CC(=C54)OC)C=C)OC)O)O)O	Active	Active	Active	Active	Non-active	Active
53511	CNC[C@@H](CC12CCC(C3=CC=CC=C31)C4=CC=CC=C24)O	Active	Active	Non-active	Non-active	Active	Active-No
53000	C1=CC(=CC=C1C(=O)O)OCCN2C=CN=C2	Active	Active	Non-active	Non-active	Active	Active-No
51683	C1C[C@H]([C@@H]2[C@@H]([C@@H](CN2C1)O)O)O	Active	Active	Non-active	Non-active	Active	Active-No
50515	CN(C)CCN1C(=O)C2=CC=CC3=CC(=CC(=C32)C1=O)N	Active	Active	Non-active	Active	Active	Active-No
44073	C1=CC(=C(C=C1C(F)(F)F)Cl)OC2=CC(=C(C=C2)[N+](=O)[O-])C(=O)O	Active	Active	Non-active	Non-active	Active	Active-No
42396	CC(C)NC[C@@H](COC1=CC=C(C=C1)O)O	Active	Active	Non-active	Non-active	Active	Active-No
41206	CC1=CC(=CC(=C1N)C)C2=CC(=C(C(=C2)C)N)C	Active	Active	Non-active	Non-active	Active	Active-No
40632	CC1=CN(C(=O)C=C1)C2=CC=CC=C2	Active	Active	Non-active	Non-active	Active	Active-No
40119	C1=CC=C2C(=C1)C(=O)C3=C(S2(=O)=O)C=C(C=C3)C4=NNN=N4	Active	Active	Non-active	Active	Active	Active-No
39676	CC1(C(=O)N(C(=O)O1)C2=CC(=CC(=C2)Cl)Cl)C=C	Active	Active	Non-active	Non-active	Active	Active-No
38853	C[C@](CC1=CC(=C(C=C1)O)O)(C(=O)O)N	Active	Active	Non-active	Non-active	Active	Active-No
37632	CN(C)CC1=NN=C2N1C3=C(C=C(C=C3)Cl)C(=NC2)C4=CC=CC=C4	Active	Active	Non-active	Non-active	Active	Active-No
35595	C([C@@H]1[C@H]([C@H]([C@@H](O1)C2=C(C(=NN2)C(=O)N)O)O)O)O	Active	Active	Active	Active	Active	Active-No
34231	C1[C@@H](C(=O)OC[C@@H](C(=O)OC[C@@H](C(=O)O1)NC(=O)C2=C(C(=CC=C2)O)O)NC(=O)C3=C(C(=CC=C3)O)O)NC(=O)C4=C(C(=CC=C4)O)O	Active	Active	Non-active	Active	Active	Active
32176	COC1=CC2=C(C=C1)C=C(C=C2)CC(=O)O	Active	Active	Non-active	Non-active	Active	Active-No
30668	CC(C1=NCCN1)OC2=C(C=CC=C2Cl)Cl	Active	Active	Non-active	Non-active	Active	Active-No
29569	CC(=O)NNC(=O)N1CC2=C(C=CC(=C2)Cl)OC3=CC=CC=C31	Active	Active	Non-active	Non-active	Active	Active-No
27661	C1[C@@H]([C@@H]2[C@H](O1)[C@@H](CO2)O[N+](=O)[O-])O	Active	Active	Non-active	Non-active	Non-active	Active-No
24466	CC1=C(C(=NC(=N1)N)N)C2=CC(=C(C=C2)Cl)Cl	Active	Active	Non-active	Non-active	Active	Active-No
22543	CN1CCC2=CC3=C(C=C2C(=O)CC4=C(C1)C5=C(C=C4)OCO5)OCO3	Active	Active	Non-active	Active	Active	Active-No
21157	CCCCS(=N)(=O)CCC(C(=O)O)N	Active	Active	Non-active	Non-active	Active	Active-No
19080	COC1=CC2=C(C3=C(C=C(C=C3)Cl)N=C2C=C1)N	Active	Active	Non-active	Active	Active	Active-No
18635	CSCCC=O	Active	Active	Non-active	Non-active	Active	Active-No
16850	C1=CC=C2C(=C1)C(=O)OC23C4=C(C=C(C=C4)O)OC5=C3C=CC(=C5)O	Active	Active	Non-active	Active	Active	Active-No
16043	CC(C)(C)C1=C(C=CC(=C1)O)O	Active	Active	Non-active	Non-active	Active	Active-No
15730	CCCCCCCCC1=CC=C(C=C1)O	Active	Active	Non-active	Non-active	Non-active	Active-No
15020	C[C@H]1CC(=O)C[C@H]2[C@]1([C@H]3CC[C@]4([C@H]([C@@H]3CC2)CC[C@@H]4O)C)C	Active	Active	Non-active	Active	Active	Active-No
14184	CCC(=O)C(CC(C)N(C)C)(C1=CC=CC=C1)C2=CC=CC=C2	Active	Active	Non-active	Non-active	Active	Active-No
13789	C[C@]12CCC(=O)C=C1C=C[C@@H]3[C@@H]2CC[C@]4([C@H]3CC[C@@]45CCC(=O)O5)C	Active	Active	Non-active	Active	Active	Active-No
12947	CCN(CCCC(C)NC1=C2C=CC(=CC2=NC=C1)Cl)CCO	Active	Active	Non-active	Non-active	Active	Active-No
12597	C1[C@H]([C@@H]2[C@H](O1)[C@H](CO2)O)O	Active	Active	Non-active	Non-active	Non-active	Active-No
11617	C=CCSCC=C	Active	Active	Non-active	Non-active	Active	Active-No
11289	COC1=CC=C(C=C1)C(=C(C2=CC=C(C=C2)OC)Cl)C3=CC=C(C=C3)OC	Active	Active	Non-active	Active	Active	Active-No
11048	OC(=O)C1=CC=CC=C1C1=C2C=C(Br)C(=O)C(Br)=C2OC2=C(Br)C([O-])=C(Br)C=C12	Active	Active	Non-active	Active	Active	Active-No
10635	C[C@]12CCC(=O)C[C@@H]1CC[C@@H]3[C@@H]2CC[C@]4([C@H]3CC[C@@H]4O)C	Active	Active	Non-active	Active	Active	Active-No
10509	C([N+](=O)[O-])([N+](=O)[O-])([N+](=O)[O-])[N+](=O)[O-]	Active	Active	Non-active	Non-active	Non-active	Active-No
10168	C1=CC2=C(C(=C1)O)C(=O)C3=C(C=C(C=C3C2=O)C(=O)O)O	Active	Active	Non-active	Active	Non-active	Active
9896	CC12CCC3C(C1CC[C@]2(CC=C)O)CCC4=CCCCC34	Active	Active	Non-active	Active	Active	Active-No
9649	COC1=C(C=C2C(=C1)[C@]34CCN5[C@H]3C[C@@H]6[C@@H]7C4N2C(=O)CC7OCC=C6C5)OC	Active	Active	Non-active	Active	Active	Active-No
9444	C1=NC(=NC(=O)N1[C@H]2[C@@H]([C@@H]([C@H](O2)CO)O)O)N	Active	Active	Active	Active	Active	Active-No
9331	C1CCN(CC1)C2(CCN(CC2)CCC(C#N)(C3=CC=CC=C3)C4=CC=CC=C4)C(=O)N	Active	Active	Non-active	Active	Active	Active-No
8956	C[C@@H]([C@H]1CC[C@@H]2[C@@]1(CC[C@H]3[C@H]2CCC4=CC(=O)CC[C@]34C)C)O	Active	Active	Non-active	Active	Active	Active-No
8567	CNC[C@@H]([C@H]([C@@H]([C@@H](CO)O)O)O)O	Active	Active	Non-active	Active	Active	Active-No
7582	C1CCC(CC1)NC2CCCCC2	Active	Active	Non-active	Non-active	Active	Active-No
7454	C1=CC(=CC=C1C(=O)CBr)Br	Active	Active	Non-active	Non-active	Active	Active-No
7290	C(C(CCl)O)O	Active	Active	Non-active	Non-active	Active	Active-No
6883	C1[C@H]([C@@H]2[C@H](O1)[C@H](CO2)O[N+](=O)[O-])O[N+](=O)[O-]	Active	Active	Non-active	Non-active	Non-active	Active-No
6623	CC(C)(C1=CC=C(C=C1)O)C2=CC=C(C=C2)O	Active	Active	Non-active	Non-active	Active	Active-No
6446	C[C@]12CCC(=O)C=C1CC[C@@H]3[C@@]2([C@H](C[C@]4([C@H]3CC[C@]4(C)O)C)O)F	Active	Active	Non-active	Active	Active	Active-No
6216	CC(=O)OCC(=O)[C@]1([C@@H](C[C@@H]2[C@@]1(C[C@@H]([C@]3([C@H]2CCC4=CC(=O)C=C[C@@]43C)F)O)C)OC(=O)C)O	Active	Active	Non-active	Active	Active	Active-No
6102	CNCC(C1=CC(=CC=C1)O)O	Active	Active	Non-active	Non-active	Active	Active-No
6082	CC(C(C1=C(C=CC(=C1)OC)OC)O)N	Active	Active	Non-active	Non-active	Active	Active-No
5959	C1=CC(=CC=C1[C@H]([C@@H](CO)NC(=O)C(Cl)Cl)O)[N+](=O)[O-]	Active	Active	Active	Non-active	Active	Active-No
5936	CC(C)OP(=O)(OC(C)C)F	Active	Active	Non-active	Non-active	Non-active	Active-No
5833	CC(=O)S[C@@H]1CC2=CC(=O)CC[C@@]2([C@@H]3[C@@H]1[C@@H]4CC[C@]5([C@]4(CC3)C)CCC(=O)O5)C	Active	Active	Non-active	Active	Active	Active-No
5746	CC1=C(C(=O)C2=C(C1=O)N3C[C@H]4[C@@H]([C@@]3([C@@H]2COC(=O)N)OC)N4)N	Active	Active	Active	Active	Non-active	Active
5723	COC1=C(C=CC(=C1)C2=NNC(=O)C=C2)OC(F)F	Active	Active	Non-active	Non-active	Active	Active-No
5681	C1=CC2=C(C=CC=C2Cl)C(=C1)S(=O)(=O)NCCCCCCN	Active	Active	Non-active	Non-active	Active	Active-No
5639	CN1C(=CC(=O)N(C1=O)C)NCCCN2CCN(CC2)C3=CC=CC=C3OC	Active	Active	Non-active	Active	Active	Active-No
5531	CCN(CC)C1=CC(=NC2=NC=NN12)C	Active	Active	Non-active	Non-active	Active	Active-No
5482	C1=CC(=C(C=C1Cl)Cl)C(CN2C=CN=C2)OCC3=C(SC=C3)Cl	Active	Active	Non-active	Active	Active	Active-No
5359	CC(C1=CC=C(C=C1)C(=O)C2=CC=CS2)C(=O)O	Active	Active	Non-active	Non-active	Active	Active-No
5279	CC12C(C(CC(O1)N3C4=CC=CC=C4C5=C6C(=C7C8=CC=CC=C8N2C7=C53)CNC6=O)NC)OC	Active	Active	Active	Active	Active	Active-No
5265	C1CN(CCC12C(=O)NCN2C3=CC=CC=C3)CCCC(=O)C4=CC=C(C=C4)F	Active	Active	Non-active	Active	Active	Active-No
5233	CC(C)COC(=O)OCN1C(=O)CN(CC1=O)CCN2CC(=O)N(C(=O)C2)COC(=O)OCC(C)C	Active	Active	Non-active	Active	Non-active	Active-No
5202	C1=CC2=C(C=C1O)C(=CN2)CCN	Active	Active	Non-active	Non-active	Active	Active-No
5142	CSC(=N)N	Active	Active	Non-active	Non-active	Active	Active-No
5125	CCCCSP(=O)(SCCCC)SCCCC	Active	Active	Non-active	Non-active	Active	Active-No
5078	CN(C)CCC1=CNC2=C1C=C(C=C2)CN3C=NC=N3	Active	Active	Non-active	Non-active	Active	Active-No
5042	C1=CC=C2C(=C1)C(=CC(=O)N2)CC(C(=O)O)NC(=O)C3=CC=C(C=C3)Cl	Active	Active	Non-active	Active	Active	Active-No
4823	CC1CC(=O)NN=C1C2=CC3=C(C=C2)N=C(N3)C4=CC=C(C=C4)OC	Active	Active	Non-active	Active	Active	Active-No
4742	CC(C)CC(C(CC(=O)O)O)NC(=O)C(C)NC(=O)CC(C(CC(C)C)NC(=O)C(C(C)C)NC(=O)C(C(C)C)NC(=O)CC(C)C)O	Active	Active	Non-active	Active	Active	Active-No
4712	C1=CC(=CC=C1C2=NC(=C(N2)C3=CC=NC=C3)C4=CC=C(C=C4)F)[N+](=O)[O-]	Active	Active	Non-active	Active	Active	Active-No
4656	C1CN=C(N1)NC2=C(C=C(C=C2Cl)I)Cl	Active	Active	Non-active	Non-active	Active	Active-No
4605	CC1C(C(C(C(O1)OC2CC(C3(C4C(CCC3(C2)O)C5(CCC(C5(CC4O)C)C6=CC(=O)OC6)O)CO)O)O)O)O	Active	Active	Non-active	Active	Active	Active-No
4578	C1=CC=C(C=C1)COC2=NC(=NC3=C2NC=N3)N	Active	Active	Non-active	Non-active	Active	Active-No
4495	CS(=O)(=O)NC1=C(C=C(C=C1)[N+](=O)[O-])OC2=CC=CC=C2	Active	Active	Non-active	Non-active	Active	Active-No
4472	C1=CC=C(C=C1)CNC(=O)CCNNC(=O)C2=CC=NC=C2	Active	Active	Non-active	Non-active	Active	Active-No
4381	CN1CC(C(C(C1CO)O)O)O	Active	Active	Non-active	Non-active	Active	Active-No
4367	C(CC(C(=O)O)N)CN=C(N)N[N+](=O)[O-]	Active	Active	Non-active	Active	Active	Active-No
4237	COC1=CC=C(C=C1)C2=C(ON=C2C3=CC=C(C=C3)OC)CC(=O)O	Active	Active	Non-active	Active	Active	Active-No
4197	CC1=C(C=C(C(=O)N1)C#N)C2=CC=NC=C2	Active	Active	Non-active	Non-active	Active	Active-No
4100	CC(=O)N=C1N(N=C(S1)S(=O)(=O)N)C	Active	Active	Non-active	Non-active	Non-active	Active-No
4044	CC1=C(C(=CC=C1)NC2=CC=CC=C2C(=O)O)C	Active	Active	Non-active	Non-active	Active	Active-No
3973	C1COCCN1C2=CC(=O)C3=C(O2)C(=CC=C3)C4=CC=CC=C4	Active	Active	Non-active	Active	Active	Active-No
3902	C1=CC(=CC=C1C#N)C(C2=CC=C(C=C2)C#N)N3C=NC=N3	Active	Active	Non-active	Non-active	Active	Active-No
3844	CCCCCCOC(=O)C1(CC2N3C4=CC=CC=C4C5=C6C(=C7C8=CC=CC=C8N(C7=C53)C1(O2)C)CNC6=O)O	Active	Active	Non-active	Active	Active	Active-No
3815	C1C2=C3C4=CC=CC=C4NC3=C5C(=C2C(=O)N1)C6=CC=CC=C6N5	Active	Active	Non-active	Active	Active	Active-No
3767	C1=CN=CC=C1C(=O)NN	Active	Active	Non-active	Non-active	Active	Active-No
3748	CC(C)NNC(=O)C1=CC=NC=C1	Active	Active	Non-active	Non-active	Active	Active-No
3718	CC(C1=CC=C(C=C1)N2CC3=CC=CC=C3C2=O)C(=O)O	Active	Active	Non-active	Active	Active	Active-No
3698	C1=CN=CC=C1C2=CNC(=O)C(=C2)N	Active	Active	Non-active	Non-active	Active	Active-No
3672	CC(C)CC1=CC=C(C=C1)C(C)C(=O)O	Active	Active	Non-active	Non-active	Active	Active-No
3606	CCC(C1=CC=C(C=C1)O)C(CC)C2=CC=C(C=C2)O	Active	Active	Non-active	Active	Active	Active-No
3501	CN1C2=CC=CC=C2C3=C4C(=C5C6=CC=CC=C6N(C5=C31)CCC#N)CNC4=O	Active	Active	Non-active	Active	Active	Active-No
3448	C1CNCC2=C1C(=O)NO2	Active	Active	Non-active	Non-active	Non-active	Active-No
3431	CCCCC(C)C(C(CC(C)CC(CCCCC(CC(C(C)N)O)O)O)OC(=O)CC(CC(=O)O)C(=O)O)OC(=O)CC(CC(=O)O)C(=O)O	Active	Active	Non-active	Active	Non-active	Active
3347	CC(C)C(C1=CC=C(C=C1)Cl)C(=O)OC(C#N)C2=CC(=CC=C2)OC3=CC=CC=C3	Active	Active	Non-active	Non-active	Active	Active-No
3295	CCOC1=CC2=C(C=C1)N=C(S2)S(=O)(=O)N	Active	Active	Non-active	Active	Active	Active-No
3238	CC(C)CC(C(=O)O)NC(=O)C(C(CC1=CC=CC=C1)N)O	Active	Active	Non-active	Non-active	Active	Active-No
3198	C1=CC(=CC=C1COC(CN2C=CN=C2)C3=C(C=C(C=C3)Cl)Cl)Cl	Active	Active	Non-active	Active	Active	Active-No
3188	CC(C)CCNC(=O)C(CC(C)C)NC(=O)C1C(O1)C(=O)O	Active	Active	Non-active	Non-active	Active	Active-No
3132	C1=CC=C(C=C1)CC(CS)C(=O)NCC(=O)O	Active	Active	Non-active	Non-active	Active	Active-No
3108	C1CCN(CC1)C2=NC(=NC3=C2N=C(N=C3N4CCCCC4)N(CCO)CCO)N(CCO)CCO	Active	Active	Non-active	Active	Active	Active-No
3071	C1=CC=C2C(=C1)C(=CN2)CC3=CNC4=CC=CC=C43	Active	Active	Non-active	Non-active	Active	Active-No
3045	C1=CC(=C(C=C1C(=O)NO)O)O	Active	Active	Non-active	Active	Active	Active-No
2999	CCC12CCC3C(C1C=CC2(C#C)O)CCC4=CC(=O)CCC34	Active	Active	Non-active	Active	Active	Active-No
2898	CC(=O)OC1=CC=C(C=C1)C(=C2CCCCC2)C3=CC=C(C=C3)OC(=O)C	Active	Active	Non-active	Active	Active	Active-No
2828	CN1CCC23C4C1CC5=C2C(=C(C=C5)OC)OC3C(C=C4)O	Active	Active	Non-active	Active	Active	Active-No
2801	CN(C)CCCN1C2=CC=CC=C2CCC3=C1C=C(C=C3)Cl	Active	Active	Non-active	Non-active	Active	Active-No
2756	CC1=C(N=CN1)CSCCNC(=NC)NC#N	Active	Active	Non-active	Non-active	Non-active	Active-No
2691	CCNC(=O)C1C(C(C(O1)N2C=NC3=C2N=C(N=C3N)NCCC4=CC=C(C=C4)CCC(=O)O)O)O	Active	Active	Non-active	Active	Active	Active-No
2554	C1=CC=C2C(=C1)C=CC3=CC=CC=C3N2C(=O)N	Active	Active	Non-active	Non-active	Active	Active-No
2449	CC1=C(C(=O)C(=C(C1=O)C)C(CCCCCC(=O)O)C2=CC=CC=C2)C	Active	Active	Non-active	Active	Active	Active-No
2403	CN1C=C(C2=CC=CC=C21)C3=C(C(=O)NC3=O)C4=CN(C5=CC=CC=C54)CCCN	Active	Active	Non-active	Active	Active	Active-No
2361	C1=CC=C(C=C1)C2=CC(=O)C3=C(O2)C=CC4=CC=CC=C43	Active	Active	Non-active	Active	Active	Active-No
2284	C1=CC(=CC=C1C(CC(=O)O)CN)Cl	Active	Active	Non-active	Non-active	Active	Active-No
2214	CC(=O)C1=CC(=C(C=C1)O)OC	Active	Active	Non-active	Non-active	Active	Active-No
2187	CC(C)(C#N)C1=CC(=CC(=C1)CN2C=NC=N2)C(C)(C)C#N	Active	Active	Non-active	Non-active	Active	Active-No
2145	CCC1(CCC(=O)NC1=O)C2=CC=C(C=C2)N	Active	Active	Non-active	Non-active	Active	Active-No
2107	CC(CC1=CNC2=C1C=C(C=C2)O)N	Active	Active	Non-active	Non-active	Active	Active-No
2052	C1=CC(=C(C=C1C=C(C#N)C#N)O)O	Active	Active	Non-active	Active	Active	Active-No
2007	C1C(ON=C1Cl)C(C(=O)O)N	Active	Active	Non-active	Non-active	Active	Active
1986	CC(=O)NC1=NN=C(S1)S(=O)(=O)N	Active	Active	Non-active	Non-active	Non-active	Active-No
1908	CN1C2=C(C(=O)N(C1=O)C)NC(=N2)C3=CC=C(C=C3)S(=O)(=O)O	Active	Active	Non-active	Active	Active	Active-No
1809	C1=CC2=C(C=C1C(=O)N)C(=CN2)CCN	Active	Active	Non-active	Non-active	Active	Active-No
1645	C1=CC(=CC(=C1)N)C(=O)N	Active	Active	Non-active	Non-active	Active	Active-No
1609	C1=CC=C2C(=C1)C(=C(OC2=O)Cl)Cl	Active	Active	Non-active	Non-active	Active	Active-No
1433	CC(=NCC1=CC(=CC=C1)CN)N	Active	Active	Non-active	Non-active	Active	Active-No
1329	CCCN1C2=C(C(=O)N(C1=O)CCC)NC(=N2)C3CCCC3	Active	Active	Non-active	Active	Active	Active-No
1223	CCC12CCN(C(C1(C)C)CC3=C2C=C(C=C3)O)CC4(CC4)O	Active	Active	Non-active	Non-active	Active	Active-No
1072	CC1=CC2=C(C=C1C)N(C3=NC(=O)NC(=O)C3=N2)CC(C(C(CO)O)O)O	Active	Active	Non-active	Active	Active	Active-No
985	CCCCCCCCCCCCCCCC(=O)O	Active	Active	Non-active	Active	Non-active	Active-No
546	C(C(=O)O)P(=O)(O)O	Active	Active	Non-active	Non-active	Active	Active-No
298	C1=CC(=CC=C1C(C(CO)NC(=O)C(Cl)Cl)O)[N+](=O)[O-]	Active	Active	Active	Non-active	Active	Active-No
255	C1=CC(=CC=C1[N+](=O)[O-])OP(=O)(O)OC2=CC=C(C=C2)[N+](=O)[O-]	Active	Active	Non-active	Non-active	Active	Active-No
72	C1=CC(=C(C=C1C(=O)O)O)O	Active	Active	Non-active	Non-active	Active	Active-No
5455	CN(C)C(=S)SSC(=S)N(C)C	Active	Non-active	Non-active	Non-active	Active	Active-No
442403	CC1=C[C@@H]2[C@](CC1)([C@]3([C@@H](C[C@H]([C@]34CO4)O2)OC(=O)C)C)C	Active	Non-active	Non-active	Non-active	Non-active	Active-No
57345768	C[C@@H]1C/C=C/C=C/C=C/C=C/C(C[C@H]2[C@@H]([C@H](C[C@](O2)(C[C@H](C[C@@H]3C(O3)/C=C/C(=O)O1)O)O)O)C(=O)O)O[C@H]4[C@H]([C@H]([C@@H]([C@H](O4)C)O)N)O	Active	Non-active	Active	Active	Non-active	Active
444679	C[C@H](/C=C/[C@H](C)C(C)C)[C@H]1CC[C@@H]2[C@@]1(CC[C@H]3C2=CC=C4[C@@]3(CC[C@@H](C4)O)C)C	Active	Non-active	Non-active	Active	Non-active	Active-No
214964	C=CC(=O)C1=CN(CC(=C1)N)P(=O)(N2CC2)OC3=CC=C(C=C3)OP(=O)(N4CC4)N5CC5	Active	Non-active	Non-active	Non-active	Non-active	Active-No
53385488	C[C@H]1/C=C/C=C/CC/C=C/C=C/C=C/C=C/[C@@H](CC2[C@@H]([C@H](C[C@](O2)(C[C@H]([C@@H](CC[C@H](C[C@H](C[C@H](CC(=O)O[C@H]([C@H]([C@@H]1O)C)C)O)O)O)O)O)O)O)C(=O)O)OC3[C@H](C([C@H]([C@H](O3)C)O)N)O	Active	Non-active	Active	Active	Non-active	Active
17753749	C[C@@H]1CC[C@H]2C[C@@H](/C(=C/C=C/C=C\[C@H](C[C@H](C(=O)[C@@H]([C@@H](/C(=C/[C@H](C(=O)C[C@H](OC(=O)[C@@H]3CCCCN3C(=O)C(=O)[C@@]1(O2)O)[C@H](C)CC4CC[C@H]([C@@H](C4)OC)O)C)/C)O)OC)C)C)/C)OC	Active	Non-active	Active	Active	Non-active	Active-No
16129676	CC1C(=O)NC(C(=O)N2CCCC2C(=O)NC(C(=O)NC(CCC(=O)NC(C(=O)NC(C(=O)NC(C(=O)NC(C(=O)NC(C(=O)NC(C(=O)NC(CCC(=O)NC(C(=O)N1)CC(=O)O)C(=O)O)CC(C)C)CC(=O)O)CO)CC3=CC=C(C=C3)O)CC(=O)O)CC4=CC=C(C=C4)O)C(=O)O)CC(=O)O)CC(=O)O	Active	Non-active	Active	Active	Non-active	Active
6507267	CSCC1CN(C(=O)O1)/N=C\C2=CC=C(O2)[N+](=O)[O-]	Active	Non-active	Non-active	Non-active	Non-active	Active-No
6433194	CCCCC[C@H]([C@@H]1[C@H](C[C@H](C[C@H](C[C@H](C[C@H](C[C@H](C[C@@H](/C(=C/C=C/C=C/C=C/C=C/[C@@H]([C@H](OC1=O)C)O)/C)O)O)O)O)O)O)O)O	Active	Non-active	Non-active	Active	Non-active	Active
6420032	C[C@H]1/C=C/C=C/CC/C=C/C=C/C=C/C=C/C(CC2C(C(C[C@](O2)(CC(C(CCC(CC(CC(CC(=O)O[C@H]([C@@H]([C@@H]1O)C)C)O)O)O)O)O)O)O)C(=O)O)OC3C(C(C(C(O3)C)O)N)O	Active	Non-active	Active	Active	Non-active	Active
5386092	C[C@H]1/C=C/C=C/C=C/C=C/C=C/C=C/C=C/[C@@H](C[C@H]2[C@@H]([C@H](C[C@](O2)(C[C@H](C[C@H]([C@@H](CC[C@H](C[C@H](CC(=O)O[C@H]([C@@H]([C@@H]1O)C)C)O)O)O)O)O)O)O)C(=O)O)OC3C(C(C(C(O3)C)O)N)O	Active	Non-active	Active	Active	Non-active	Active
5351457	CCCCCC(C1C(CC(CC(CC(CC(CC(CC(/C(=C\C=C/C=C/C=C/C=C/C(C(OC1=O)C)O)/C)O)O)O)O)O)O)O)O	Active	Non-active	Non-active	Active	Non-active	Active
13916	C1=CC(=C(C(=C1)Cl)[N+](=O)[O-])C2=CNC=C2Cl	Active	Non-active	Active	Non-active	Active	Active-No
5541	CC(=O)OCC(COC(=O)C)OC(=O)C	Active	Non-active	Non-active	Non-active	Non-active	Active-No
44630461	COC1=CC2=C(C=CN=C2C=C1)[C@H](C3C[C@@H]4CCN3C[C@@H]4C=C)O	Active	Non-active	Non-active	Active	Active	Active-No
4993	CCC1=C(C(=NC(=N1)N)N)C2=CC=C(C=C2)Cl	Active	Non-active	Non-active	Non-active	Active	Active-No
16132245	CC(C)[C@@H](C(=O)NCC(=O)N[C@@H](CCC(=O)O)C(=O)N[C@@H](CS)C(=O)N[C@@H](C(C)C)C(=O)N[C@@H](CCCNC(=N)N)C(=O)NCC(=O)N[C@@H](CCCNC(=N)N)C(=O)N[C@@H](CS)C(=O)N1CCC[C@H]1C(=O)N[C@@H](CO)C(=O)NCC(=O)N[C@@H](CCSC)C(=O)N[C@@H](CS)C(=O)N[C@@H](CS)C(=O)N[C@@H](CO)C(=O)N[C@@H](CCC(=O)N)C(=O)N[C@@H](CC2=CC=CC=C2)C(=O)NCC(=O)N[C@@H](CC3=CC=C(C=C3)O)C(=O)OC(=O)CNC(=O)[C@H](CS)NC(=O)[C@H](CC4=CC=C(C=C4)O)NC(=O)[C…	Active	Non-active	Non-active	Active	Non-active	Active-No
5315	C1=CC(=CC=C1NC(=O)CCC(=O)O)S(=O)(=O)NC2=NC=CS2	Active	Non-active	Non-active	Active	Active	Active-No
93395	C(C([N+](=O)[O-])(Br)Br)O	Active	Non-active	Non-active	Non-active	Non-active	Active-No
475825	C1[C@H]([C@@H]2[C@@H](C(=O)N1)N=C(N2)NC3C(C(C(C(O3)CO)OC(=O)N)O)NC(=O)CC(CCCN)N)O	Active	Non-active	Active	Active	Non-active	Active
440687	CC(CCC(=O)NCCS(=O)(=O)O)C1CCC2[C@@]1([C@H](CC3C2CCC4[C@@]3(CC[C@H](C4)O)C)O)C	Active	Non-active	Non-active	Active	Non-active	Active-No
363418	CCCCCCCCSC1C(C(C(C(O1)CO)O)O)O	Active	Non-active	Non-active	Active	Non-active	Active-No
123921	CCCCCCCCCCCCOCCOCCOCCOCCOCCOCCOCCOCCO	Active	Non-active	Non-active	Active	Non-active	Active-No
56840807	CC(CCC(=O)NCCS(O)(=O)=O)[C@H]1CC[C@H]2[C@@H]3CC[C@@H]4C[C@H](O)CC[C@]4(C)[C@H]3C[C@H](O)[C@]12C	Active	Non-active	Non-active	Active	Non-active	Active-No
46936732	C1[C@@H]([C@H]([C@@H]([C@H]([C@@H]1N)O[C@@H]2[C@H]([C@@H]([C@H]([C@@H](O2)CN)O)O)N)O[C@H]3[C@@H]([C@H]([C@@H](O3)CO)O)O)O)N	Active	Non-active	Non-active	Active	Non-active	Active
22833539	C[C@H](CCC(=O)NCC(=O)O)[C@H]1CCC2[C@@]1([C@H](CC3C2CC[C@H]4[C@@]3(CC[C@H](C4)O)C)O)C	Active	Non-active	Non-active	Active	Non-active	Active-No
23668817	CCCCCCCCCCCC(=O)N(C)CC(O)=O	Active	Non-active	Non-active	Non-active	Non-active	Active-No
11957443	C[C@H](CCC(=O)NCCS(=O)(=O)[O-])C1CCC2C1([C@H](CC3C2[C@@H](CC4C3(CC[C@H](C4)O)C)O)O)C	Active	Non-active	Non-active	Active	Non-active	Active-No
9548902	C[C@H](CCC(=O)NCCS(=O)(=O)[O-])[C@H]1CC[C@@H]2[C@@]1(CC[C@H]3[C@H]2[C@@H](C[C@H]4[C@@]3(CC[C@H](C4)O)C)O)C	Active	Non-active	Non-active	Active	Non-active	Active-No
6560168	CC1=C(N2[C@H](SC1)[C@H](NC(=O)[C@H](N)C1=CC=CC=C1)C2=O)C(O)=O	Active	Non-active	Active	Active	Non-active	Active
5474986	CC1C/C=C/C=C\C(C(CC(C(C(C(CC(=O)O1)OC(=O)C)OC)OC2C(C(C(C(O2)C)OC3CC(C(C(O3)C)OC(=O)CC(C)C)(C)O)N(C)C)O)CC=O)C)O	Active	Non-active	Active	Active	Non-active	Active
5282189	C[C@@H]1C/C=C/C=C/[C@@H]([C@@H](C[C@@H]([C@@H]([C@H]([C@@H](CC(=O)O1)O)OC)O[C@H]2[C@@H]([C@H]([C@@H]([C@H](O2)C)O[C@H]3C[C@@]([C@H]([C@@H](O3)C)O)(C)O)N(C)C)O)CC=O)C)O	Active	Non-active	Active	Active	Non-active	Active
5280707	C1=COC(=C1)/C(=C/C2=CC=C(O2)[N+](=O)[O-])/C(=O)N	Active	Non-active	Non-active	Non-active	Active	Active-No
2733768	C[C@H](CCC(=O)NCCS(=O)(=O)O)[C@H]1CC[C@@H]2[C@@]1([C@H](C[C@H]3[C@H]2CC[C@H]4[C@@]3(CC[C@H](C4)O)C)O)C	Active	Non-active	Non-active	Active	Non-active	Active-No
62305	C[C@@H]1[C@H]2[C@H](O)[C@H]3[C@H](N(C)C)C(=O)C(=C(N)O)C(=O)[C@@]3(O)C(=O)C2=C(O)C2=C1C=CC=C2O	Active	Non-active	Non-active	Active	Non-active	Active
24750	CCCCCCCCCCCCOCCO	Active	Non-active	Non-active	Non-active	Non-active	Active-No
10595	CC(CCC(=O)NCCS(=O)(=O)O)[C@H]1CC[C@@H]2[C@@]1(CC[C@H]3[C@H]2CC[C@H]4[C@@]3(CC[C@H](C4)O)C)C	Active	Non-active	Non-active	Active	Non-active	Active-No
6675	C[C@H](CCC(=O)NCCS(=O)(=O)O)[C@H]1CC[C@@H]2[C@@]1([C@H](C[C@H]3[C@H]2[C@@H](C[C@H]4[C@@]3(CC[C@H](C4)O)C)O)O)C	Active	Non-active	Non-active	Active	Non-active	Active-No
5590	CC(C)(C)CC(C)(C)C1=CC=C(C=C1)OCCO	Active	Non-active	Non-active	Non-active	Active	Active-No
5094	CN1C(=CN=C1COC(=O)N)[N+](=O)[O-]	Active	Non-active	Non-active	Non-active	Non-active	Active-No
2762	CCN1C2=CC3=C(C=C2C(=O)C(=N1)C(=O)O)OCO3	Active	Non-active	Non-active	Active	Active	Active-No
441084	CO[C@@]1([C@@H]2N(C1=O)C(=C(CS2)COC(=O)N)C(=O)O)NC(=O)CCC[C@H](C(=O)O)N	Active	Non-active	Active	Active	Non-active	Active
24176	C1[C@H]([C@@H]([C@H](C([C@H]1N)O[C@@H]2[C@@H]([C@H]([C@@H]([C@H](O2)CO)O)O)N)OC3[C@@H]([C@@H]([C@H](O3)CO)O[C@@H]4[C@@H]([C@H]([C@@H]([C@@H](O4)CN)O)O)N)O)O)N	Active	Non-active	Active	Active	Non-active	Active
36119	C[C@@]1(CO[C@@H]([C@@H]([C@H]1NC)O)O[C@H]2[C@@H](C[C@@H]([C@H]([C@@H]2O)O[C@@H]3[C@@H](CC=C(O3)CN)N)N)N)O	Active	Non-active	Active	Active	Non-active	Active
6436158	CCC(=O)O[C@@H]1[C@H](O[C@H](C[C@@]1(C)O)O[C@@H]2[C@H](O[C@H]([C@@H]([C@H]2N(C)C)O)OC3C(CC(C(/C=C\C=C\CC(OC(=O)CC(C3OC)OC(=O)CC)C)O)C)CC=O)C)C	Active	Non-active	Active	Active	Non-active	Active
134061	CC12CC3=C(C(=C4C(=C3)C=CC5=C4C(=O)C6=C(C5=O)OC7=CC(=C(C=C7C6=O)OC)OC)O)C(=O)N1CCO2	Active	Non-active	Active	Active	Non-active	Active
14974	CCC1C(=O)N2CCCC2C(=O)N(C(C(=O)N3CCC(=O)CC3C(=O)NC(C(=O)OC(C(C(=O)N1)NC(=O)C4=C(C=CC=N4)O)C)C5=CC=CC=C5)CC6=CC=C(C=C6)N(C)C)C	Active	Non-active	Active	Active	Non-active	Active
494023	CC(C)CCCCCCCCCCCCC(=O)NCC(=O)NC1C(C(C(OC1C(CO)O)NC2=NC=NC3=C2NC=N3)O)O	Active	Non-active	Active	Active	Non-active	Active-No
16132338	CCC/C=C\C=C/C(=O)N[C@@H](CC(=O)N)C(=O)NC(CC(=O)N)C(=O)N[C@H](C1CCC(CC1)O)C(=O)N[C@H](CCCN)C(=O)N[C@H]([C@H](C)O)C(=O)N[C@H](C2CCC(CC2)O)C(=O)N[C@H](C3CCC(CC3)O)C(=O)N[C@@H]([C@H](C)O)C(=O)N[C@@H](CC4=CC=CC=C4)C(=O)N[C@H](CCCN)C(=O)NC(C5CCC(CC5)O)C(=O)N[C@@H]([C@H](C)O)C(=O)NC(C6CCC(CC6)O)C(=O)NCC(=O)N[C@@H](CC(C)C)C(=O)N[C@H](C)C(=O)NC(C7CCC(C(C7)Cl)O)C(=O)O	Active	Non-active	Active	Active	Non-active	Active
166290	CC(C)[C@@H]1[C@H]2CC(=C(N2C1=O)C(=O)O)SCCNC(=O)C	Active	Non-active	Active	Active	Non-active	Active
162082	C1=CC(=O)[C@@]([C@H]1O)(CO)O	Active	Non-active	Active	Non-active	Non-active	Active
3085028	C[C@@H]1[C@H](O[C@]([C@@H]([C@H]1O[C@H]2CC[C@@H]([C@H](O2)C)OC)C)(C)O)[C@H]3CC[C@@H](O3)[C@@H]4CC[C@@H](O4)[C@@]5([C@@H]([C@H]([C@@]6(O5)[C@@H]([C@@H](C[C@H](O6)C[C@H]7[C@]([C@H]([C@@H]([C@](O7)([C@H](C(=O)O)O)O)C)OC)(C)OC)OC)C)C)OC)C	Active	Non-active	Active	Active	Non-active	Active
197261	CC1C(C(C(C(O1)NC2=CC(=O)C3=C(C4=C(C=C3C2=O)C(=O)C5(C6=C(C(=C(C=C6CC(C5(C4=O)OC)O)C)C(=O)OC)O)O)O)OC)O)OC	Active	Non-active	Active	Active	Non-active	Active
54675779	C[C@@]1([C@H]2[C@@H]([C@H]3[C@@H](C(=O)C(=C([C@]3(C(=O)C2=C(C4=C1C=CC=C4O)O)O)O)C(=O)N)N(C)C)O)O	Active	Non-active	Active	Active	Active	Active
71260	CC[C@@H]1[C@@]([C@@H]([C@H](C(=O)[C@@](C[C@@]([C@@H]([C@H]([C@@H]([C@H](C(=O)O1)C)O[C@H]2C[C@@]([C@H]([C@@H](O2)C)O)(C)OC)C)O[C@H]3[C@@H]([C@H](C[C@H](O3)C)N(C)C)O)(C)O)(C)F)C)O)(C)O	Active	Non-active	Active	Active	Non-active	Active
107677	C[C@@]1(CO[C@@H]([C@@H]([C@H]1NC)O)O[C@H]2[C@@H](C[C@@H](C([C@@H]2O)O[C@@H]3[C@@H](CC[C@H](O3)CNC)N)N)N)O	Active	Non-active	Active	Active	Non-active	Active
54684011	C(C1C(=C(C(=O)N1)C(=O)CC(C(=O)O)(C(=O)O)NC(=O)C(CO)N)O)N	Active	Non-active	Active	Active	Non-active	Active
4461	CN1C=C(C=C1C(=O)NC2=CN(C(=C2)C(=O)NCCC(=N)N)C)NC(=O)CN=C(N)N	Active	Non-active	Active	Active	Non-active	Active-No
28516	CC1CC2=C(C(=CC=C2)O)C(=O)O1	Active	Non-active	Active	Non-active	Active	Active-No
6447669	C/C(=C\C1=CC(=C(C=C1)OC2C(C(C(O2)C(=O)C)O)O)O)/C(=O)NC3C(C(C(C(C3O)O)OC)O)O	Active	Non-active	Active	Active	Non-active	Active
3050980	C1C[C@@H](C(=O)N[C@@H]1C[C@@H]2[C@H]([C@H]([C@@H](O2)N3C=NC4=C3N=CN=C4N)O)O)N	Active	Non-active	Active	Active	Non-active	Active
160102	CC(C)C[C@H]1C(=O)N2CCCC[C@H]2C(=O)N[C@H](C(=O)N[C@@H](C(=O)N1)CC3=CC=CC=C3)CCCCCC(=O)C4CO4	Active	Non-active	Active	Active	Active	Active-No
3056186	CNC1C(CC(C(C1O)OC2C(CCC(O2)CN)N)N)OC	Active	Non-active	Active	Active	Non-active	Active
6445460	CC1CC(C(C(C(CC(=O)OC(CC2C(O2)/C=C/C1O)C)OC(=O)C)OC)OC3C(C(C(C(O3)C)OC4CC(C(C(O4)C)OC(=O)CC(C)C)(C)O)N(C)C)O)CC=O	Active	Non-active	Active	Active	Non-active	Active
124382	C[C@@H]1[C@H](CC2(CC[C@@](O2)(C)[C@H]3CC[C@@](O3)(C)[C@H]4[C@H]([C@H]([C@@H](O4)[C@@H]5[C@H]([C@@H]([C@H]([C@@](O5)(C)O)C)OC)C)OC)C)O[C@@H]1[C@@H](C)[C@@H]6[C@@H]([C@@H]([C@H]([C@@](O6)([C@H](C)C(=O)O)O)C)OC)C)OC	Active	Non-active	Active	Active	Non-active	Active
6441077	C[C@@H]1/C=C/C(=O)NC/C=C/C(=C/[C@H](C[C@H](CC2=NC(=CO2)C(=O)N[C@@H](C(=O)O[C@@H]1C(C)C)C)O)O)/C	Active	Non-active	Active	Active	Non-active	Active
3032940	C1CN=C(N[C@H]1[C@H]2C(=O)NC[C@@H](C(=O)N[C@H](C(=O)N[C@H](C(=O)N/C(=C\NC(=O)N)/C(=O)N2)CNC(=O)C[C@H](CCCN)N)CO)N)N	Active	Non-active	Active	Active	Non-active	Active
16131155	C1[C@@H]2C(=O)N[C@@H](C3=CC(=CC(=C3)O)OC4=C(C=CC(=C4)[C@H](C(=O)N2)N)OS(=O)(=O)O)C(=O)N[C@@H]5C6=CC(=C(C(=C6)OC7=C(C=C(C=C7)[C@H]([C@H]8C(=O)N[C@@H](C9=CC(=CC(=C9C2=CC(=CC(=C2O)Cl)[C@H](C(=O)N8)NC5=O)O)O)C(=O)O)O)Cl)O)OC2=C(C=C1C=C2)Cl	Active	Non-active	Active	Active	Non-active	Active
42474	CC[C@]1(C[C@@H](C2=C([C@H]1C(=O)OC)C=C3C(=C2O)C(=O)C4=C(C3=O)C=CC=C4O)O[C@H]5CC([C@@H]([C@@H](O5)C)O[C@H]6C[C@@H]([C@@H]([C@@H](O6)C)O[C@H]7CCC(=O)[C@@H](O7)C)O)N(C)C)O	Active	Non-active	Active	Active	Non-active	Active
6436150	CC[C@@H]1[C@]([C@H]2[C@H](O2)/C=C/C(=O)[C@@H](C[C@@H]([C@@H]([C@H](/C=C/C(=O)O1)C)O[C@H]3[C@@H]([C@H](C[C@H](O3)C)N(C)C)O)C)C)(CO[C@H]4[C@@H]([C@@H]([C@@H]([C@H](O4)C)O)OC)OC)O	Active	Non-active	Active	Active	Non-active	Active
308111	C1=CC(=C(C=C1NCC2=C(C3=C(C=C2)N=C(N=C3N)N)Cl)Cl)Cl	Active	Non-active	Active	Active	Active	Active-No
198259	CC(=O)O[C@H]1C=CC(=O)[C@@]1(CO)O	Active	Non-active	Active	Non-active	Non-active	Active
16129740	CC(=O)O[C@H]1CC=NN2[C@@H]1C(=O)NCC(=O)N(CC(=O)N([C@H](C(=O)OC[C@H](C(=O)N3[C@@H]([C@H](CC=N3)OC(=O)C)C(=O)NCC(=O)N(CC(=O)N([C@H](C(=O)OC[C@H](C2=O)NC(=O)C4=C(C=C5C=C(C=CC5=N4)OC)O)C(C)(C)O)C)C)NC(=O)C6=C(C=C7C=C(C=CC7=N6)OC)O)C(C)(C)O)C)C	Active	Non-active	Active	Active	Non-active	Active
16760429	CC(O)(\C=C\C1CC=CC(=O)O1)C(CC(O)\C=C\C=C\C=C\CO)OP(O)(O)=O	Active	Non-active	Active	Active	Non-active	Active-No
247955	C1=C(C2=C(N1C3C(C(C(O3)CO)O)O)N=CN=C2N)C#N	Active	Non-active	Active	Active	Non-active	Active
6438547	CCCC1C(=O)NCC(CC(C(CC/C(=C\C=CC(CCCC(=O)CCCCC(CC(C(=O)O1)C)C)CC)/COC)O)O)O	Active	Non-active	Active	Active	Non-active	Active
5487319	C[C@H](C1=CC=CC2=NC3=C(C=CC=C3N=C21)C(=O)O)OC(=O)[C@@H](CO)OC	Active	Non-active	Active	Active	Active	Active-No
6433568	CCCCC1C/C=C/C=C/C=C/C=C/C(CC2C(C(CC(O2)(CC(CC3C(O3)/C=C/C(=O)O1)O)O)O)C(=O)O)O[C@H]4C(C([C@@H](C(O4)C)O)N)O	Active	Non-active	Active	Active	Non-active	Active
159776	CC[C@]1(C[C@@H](C2=C([C@H]1C(=O)OC)C=C3C(=C2O)C(=O)C4=C(C3=O)C=CC=C4O)O)O	Active	Non-active	Active	Active	Non-active	Active
175981	CC[C@]1(C[C@@H](C2=C([C@H]1C(=O)OC)C=C3C(=C2O)C(=O)C4=C(C=CC(=C4C3=O)O)O)O[C@H]5C[C@@H]([C@@H]([C@@H](O5)C)O[C@H]6C[C@H]7[C@@H]([C@@H](O6)C)O[C@H]8[C@@H](O7)CC(=O)[C@H](O8)C)N(C)C)O	Active	Non-active	Active	Active	Non-active	Active
163395	CC[C@H]([C@@H]1[C@H](C[C@@](O1)(C)[C@]2([C@@H](C[C@](O2)(CC)[C@H](CC)O)C)O)C)C(=O)[C@@H](C)[C@H]([C@H](C)[C@@H]3[C@H](C[C@H]([C@@](O3)([C@H](C)C(=O)O)O)C)C)O	Active	Non-active	Active	Active	Non-active	Active
23691746	CN1N=NN=C1SCC1=C(N2[C@H](SC1)[C@H](NC(=O)C(NC(=O)C1=CNC(C)=CC1=O)C1=CC=C(O)C=C1)C2=O)C(O)=O	Active	Non-active	Active	Active	Non-active	Active
160139	CC1=C(N2[C@@H]([C@@H](C2=O)NC(=O)CCC[C@H](C(=O)O)N)SC1)C(=O)O	Active	Non-active	Active	Active	Non-active	Active
16132042	C[C@@H](C(=O)N[C@@H](CCC(=O)N)C(=O)NC(C)(C)C(=O)N[C@@H](C(C)C)C(=O)NC(C)(C)C(=O)NCC(=O)N[C@@H](CC(C)C)C(=O)NC(C)(C)C(=O)N1CCC[C@H]1C(=O)N[C@@H](C(C)C)C(=O)NC(C)(C)C(=O)NC(C)(C)C(=O)N[C@@H](CCC(=O)O)C(=O)N[C@@H](CCC(=O)N)C(=O)N[C@@H](CC2=CC=CC=C2)CO)NC(=O)C(C)(C)NC(=O)[C@H](C)NC(=O)C(C)(C)NC(=O)[C@@H]3CCCN3C(=O)C(C)(C)NC(=O)C	Active	Non-active	Active	Active	Non-active	Active
6439822	C[C@@H](C(=O)N[C@@H](CNC(=O)/C=C/C(=O)N)C(=O)O)N	Active	Non-active	Active	Active	Non-active	Active-No
15541	C[C@@H]1CC(=O)[C@]2([C@@H](O1)O[C@@H]3[C@H]([C@@H]([C@@H]([C@@H]([C@H]3O2)NC)O)NC)O)O	Active	Non-active	Active	Active	Non-active	Active
127008	CCC1=NC=C(O1)C2=CNC3=CC=CC=C32	Active	Non-active	Active	Non-active	Active	Active-No
41744	CCCCC(=O)OCC(=O)[C@]1(C[C@@H](C2=C(C3=C(C(=C2C1)O)C(=O)C4=C(C3=O)C(=CC=C4)OC)O)OC5CC(C(C(O5)C)O)NC(=O)C(F)(F)F)O	Active	Non-active	Active	Active	Non-active	Active
6323490	C[C@H]1/C=C/C=C(\C(=O)NC2=C3C(=NC4(N3)CCN(CC4)CC(C)C)C5=C6C(=C(C(=C5C2=O)O)C)O[C@@](C6=O)(O/C=C/[C@@H]([C@H]([C@H]([C@@H]([C@@H]([C@@H]([C@H]1O)C)O)C)OC(=O)C)C)OC)C)/C	Active	Non-active	Active	Active	Non-active	Active
133916	CC(C1C2CC(=C(N2C1=O)C(=O)O)SCCNC(=O)CCNC(=O)C(C(C)(C)CO)O)OS(=O)(=O)O	Active	Non-active	Active	Active	Non-active	Active
174677	CC[C@@H]1[C@@H]([C@@H]([C@H](O[C@]1(CC(=O)O)O)[C@@H](C)[C@@H]([C@H](C)C(=O)[C@H](CC)[C@@H]2[C@H](C[C@@](O2)(C)[C@]3([C@@H](C[C@](O3)(CC)[C@H](CC)O)C)O)C)O)C)O	Active	Non-active	Active	Active	Non-active	Active
5490991	CC[C@@H]1[C@@H]([C@@H]([C@H](O[C@]1(C)O)[C@@H](C)[C@@H]([C@H](C)C(=O)[C@H](CC)[C@@H]2[C@H](C[C@@](O2)(C)C34[C@@H](C[C@](O3)([C@@H](O4)CC)CC)C)C)O)C)O	Active	Non-active	Active	Active	Non-active	Active
54692151	CN(C)[C@H]1[C@@H]2C[C@@H]3[C@@H](C4=C(C=CC(=C4C(=C3C(=O)[C@@]2(C(=O)C(=C1O)C(=O)N)O)O)O)Cl)O	Active	Non-active	Active	Active	Non-active	Active
163090	C1[C@@H]([C@H]([C@@H]([C@H]([C@@H]1N)O[C@@H]2[C@@H]([C@H]([C@@H]([C@H](O2)CO)O)N)O)O)O[C@@H]3[C@@H](C[C@@H]([C@H](O3)CO)O)N)N	Active	Non-active	Active	Active	Non-active	Active
128473	CC[C@@H]1[C@H]2CC(=C(N2C1=O)C(=O)O)SCCNC(=O)CCNC(=O)[C@@H](C(C)(C)CO)O	Active	Non-active	Active	Active	Non-active	Active
159291	CCC1(CC(C2=C(C3=C(C(=C2C1)O)C(=O)C4=C(C3=O)C(=CC=C4)O)O)OC5CC(C(C(O5)C)O)N6CCOCC6)O	Active	Non-active	Active	Active	Non-active	Active
308371	CCC1C(C(C(C(=O)C(CC(C(C(C(C(C(=O)O1)C)OC2CC(C(C(O2)C)O)(C)O)C)O)(C)O)C)C)O)C	Active	Non-active	Active	Active	Non-active	Active
20483	C(CSSSCCO)O	Active	Non-active	Active	Non-active	Active	Active-No
11957499	C[C@@H]1CC[C@]2([C@@H](C[C@H]([C@H](O2)[C@H](C)C(=O)C3=CC=CN3)C)C)O[C@@H]1CC4=NC5=C(O4)C=CC(=C5C(=O)O)NC	Active	Non-active	Active	Active	Non-active	Active
171087	CC1(COC(C(C1NC)O)OC2C(CC(C(C2O)OC3C(CC=C(O3)CNC)N)N)N)O	Active	Non-active	Active	Active	Non-active	Active
3070093	CC(CCCCCCCC(CC1CCCCCCCCCCCC(CC(CCCCCCCCCCCCCC(=O)O1)OS(=O)(=O)O)OS(=O)(=O)O)OS(=O)(=O)O)OS(=O)(=O)O	Active	Non-active	Active	Active	Non-active	Active
173379	CCOC(=O)C1[C@@H](C[C@@H](O1)[C@@]2([C@@H]([C@H](C3(O2)[C@@H](C=C[C@]4(O3)[C@@H](C[C@@H]([C@H](O4)[C@@H](C)C(=O)[C@@H](C)[C@H]([C@H](C)C[C@H](C)C5=C(C=C(C(=C5C(=O)O)O)C)Cl)O)C)C)O)C)OC)C)O	Active	Non-active	Active	Active	Non-active	Active
72519	C[C@@H]1C[C@H]2CC[C@H](O2)[C@@H](C(=O)O[C@H](C[C@@H]3CC[C@@H](O3)[C@H](C(=O)O[C@@H](C[C@H]4CC[C@H](O4)[C@@H](C(=O)O[C@H](C[C@@H]5CC[C@@H](O5)[C@H](C(=O)O1)C)C)C)C)C)C)C	Active	Non-active	Active	Active	Non-active	Active
5282032	CC[C@@H]1[C@@H](/C=C/C(=O)[C@@H](C[C@@H]([C@@H]([C@H](C(=O)O1)C)O[C@H]2[C@@H]([C@H](C[C@H](O2)C)N(C)C)O)C)C)C	Active	Non-active	Active	Active	Non-active	Active
5282242	C1C=C(N2[C@H](S1)[C@@H](C2=O)NC(=O)/C(=C\CC(=O)O)/C3=CSC(=N3)N)C(=O)O	Active	Non-active	Active	Active	Non-active	Active
160754	C([C@@H](C(=O)O)N)C(=O)CO	Active	Non-active	Active	Active	Active	Active-No
5281394	C[C@@H]1[C@@H]([C@@H]([C@H]([C@@H](O1)OC2=CC=CC3=C2C4=C5C6=C(C=CC(=C6C(=O)O4)C)OC(=O)C5=C3O)O[C@@H]7[C@@H]([C@H]([C@H]([C@H](O7)C)O)OC)O)O)O	Active	Non-active	Active	Active	Non-active	Active
156387	CC1=CC(=C2C(=C1)C(=O)OC3=C2C(=O)C4=C(C3=O)C(=CC=C4)O)OC	Active	Non-active	Active	Active	Non-active	Active-No
441130	C[C@@H]1[C@@H]2[C@H](C(=O)N2C(=C1S[C@H]3C[C@H](NC3)C(=O)N(C)C)C(=O)O)[C@@H](C)O	Active	Non-active	Active	Active	Non-active	Active
128448	CC1=C2C(=O)C=C(OC2=C3C(=C1)C(=O)C4=C(C3=O)C(=CC=C4)O)C5(CO5)C6CO6	Active	Non-active	Active	Active	Non-active	Active
3052876	CC1(COC(C(C1NC)O)OC2C(CC(C(C2O)OC3C(CCC(O3)CN(C)C)N)N)N)O	Active	Non-active	Active	Active	Non-active	Active
133379	C1=CC(=C(C(=C1)O)NC(=O)C2=C(C=CC=N2)O)C3=NC4=C(C=CC=C4O3)C(=O)O	Active	Non-active	Active	Active	Active	Active-No
133928	CC(C1C2CC(=C(N2C1=O)C(=O)O)SCCNC(=O)CCNC(=O)C(C(C)(C)CO)O)O	Active	Non-active	Active	Active	Non-active	Active
197301	CCCCC1=C2C(=CC(=C1)O)C(=O)C3=CC(=CC(=C3C2=O)O)O	Active	Non-active	Active	Active	Non-active	Active
152639	CC[C@]1(C[C@@H](C2=C([C@H]1C(=O)OC)C=C3C(=C2O)C(=O)C4=C(C3=O)C=CC=C4O)O[C@H]5C[C@@H]([C@@H]([C@@H](O5)C)O[C@H]6C[C@@H]([C@@H]([C@@H](O6)C)O)O)N(C)C)O	Active	Non-active	Active	Active	Non-active	Active
6448028	CC1=C(C=C2C(=C1O)C(=O)C3(CC(C(OC3(C2=O)C/C=C(\C)/CCC=C(C)C)(C)C)Cl)Cl)O	Active	Non-active	Active	Active	Non-active	Active
5351221	CC1=C(C2=C(C=C1)C(=O)N3C=C(C[C@H]3[C@H](N2)OC)/C=C/C(=O)N)O	Active	Non-active	Active	Active	Non-active	Active
4490	CC1CCC(OC1C(C)C(=O)O)CC2CC(C(C3(O2)C(CC(O3)(C)C4CCC(O4)(C)C5C(CC(O5)C6C(CC(C(O6)(CO)O)C)C)C)C)C)OC	Active	Non-active	Active	Active	Non-active	Active
155782	CC(=O)N(C[C@H](CP(=O)(O)O)O)O	Active	Non-active	Active	Non-active	Non-active	Active-No
23674729	CC(=O)N(C[C@H](CP(=O)(O)[O-])O)O	Active	Non-active	Active	Non-active	Non-active	Active-No
3037928	CC[C@H](C1[C@H](C[C@@](O1)(C)[C@]2([C@@H](C[C@@](O2)(CC)[C@H](C)O)C)O)C)C(=O)[C@@H](C)[C@H](C(C)[C@@H]3[C@H](C[C@H]([C@@H](O3)CC(=O)OO)C)C)O	Active	Non-active	Active	Active	Non-active	Active
129935	C[C@H]([C@@H]1[C@@H]2N(C1=O)C(=C(S2)CN)C(=O)O)O	Active	Non-active	Active	Active	Non-active	Active
3058080	CCCCCCC1C(C(=O)N(C(C(=O)NC(C(=O)NC(C(=O)NC(C(=O)NCC(=O)O1)C(C)O)CO)C(C)C)CC(C)C)C)C	Active	Non-active	Active	Active	Non-active	Active
54675	C(CCN=C(N)N)CC(CC(=O)NCOC(=O)NCCCCNCCCN)O	Active	Non-active	Active	Active	Non-active	Active-No
198464	CCC(C1CCC(C(O1)C(C)C(C(C)C(=O)C(CC)C2C(CC(C3(O2)C=CCC4(O3)CCC(O4)(C)C5CCC(C(O5)C)(CC)O)C)C)O)C)C(=O)O	Active	Non-active	Active	Active	Non-active	Active
153492	CC1=C(C2=C(C(N3C4C2N5CCOC5C6C4N(C(C6)C3O)C)CO)C(=O)C1=O)O	Active	Non-active	Active	Active	Non-active	Active
6438788	CCCCC/C=C/C=C/C(=O)OC1C(OC(CC1O)C2=C(C3=C(C=C2)C(=O)C4=C(C3=O)C=CC5(C4(C(=O)C=C(C5)C)O)O)O)C	Active	Non-active	Active	Active	Non-active	Active
199159	C1C(C2C(C(=O)N1)N=C(N2)N[C@H]3[C@@H]([C@@H]([C@H]([C@H](O3)CO)OC(=O)N)O)NC(=O)C[C@H](CCCNC(=O)C[C@H](CCCNC(=O)C[C@H](CCCN)N)N)N)O	Active	Non-active	Active	Active	Non-active	Active
23684879	CC(C)C1C2CC(S\C=C\NC(C)=O)=C(N2C1=O)C(O)=O	Active	Non-active	Active	Active	Non-active	Active
3034031	CC[C@H](C)C(=O)O[C@@H](C)[C@]1([C@@H](OC(C[C@@H]1OC)O[C@H]2[C@H]([C@@H](O[C@@H]([C@H]2OC(=O)C(C(C)SC[C@@H](C(=O)O)NC(=O)C)NC(=S)SC[C@@H](C(=O)O)NC(=O)C)COC(=O)C)[C@]3(CC(=O)C(=C(C3=O)C(=O)O)N)O)O)C)O	Active	Non-active	Active	Active	Non-active	Active
3081079	C#CC#CC#C[C@H](C1[C@@H](OC(=O)O1)CCCCCCC(=O)O)O	Active	Non-active	Active	Non-active	Non-active	Active-No
50464	CC1(COC(C(C1NC)O)OC2C(CC(C(C2O)OC3C(CCC(O3)CN)N)NC)N)O	Active	Non-active	Active	Active	Non-active	Active
6447674	CC1C(C/C=C\C=C/C=C\C(CC(=O)NC2=CC(=O)C=C(C2=O)CC/C=C(\C1O)/C)OC)OC(=O)[C@@H](C)NC(=O)C3CCCCC3	Active	Non-active	Active	Active	Non-active	Active
456854	CC(C(C(C(=O)CC1(C=COC1(C)C(C)(C)C=C)C)O)OC)O	Active	Non-active	Active	Non-active	Non-active	Active-No
23702778	CO\C(=C/C1=CC=C(C=C1)OS(=O)(=O)O)C(=O)OCC1=C(C(=O)O)N2C(=O)[C@@](OC)(NC(=O)CCCC(N)C(=O)O)[C@H]2SC1	Active	Non-active	Active	Active	Non-active	Active
6447531	CC1C2CC(C(/C=C/C=C(/CC3=CC(=C(C(=C3)OC)Cl)NC(=O)CC(C4(C1O4)C)OC(=O)C)\C)OC)(NC(=O)O2)O	Active	Non-active	Active	Active	Non-active	Active
16132282	CC[C@](C)(C(=O)NCC(=O)NC(CC(C)C)C(=O)N(C)C(C)C(=O)N(C)CC(=O)N1C[C@H](CC1C(=O)NC(CCC(=O)N)C(=O)N[C@](C)(CC)C(=O)N2C[C@H](CC2C(=O)N(C)C(C)C(=O)N3CCCC3C(=O)N[C@@H](CC4=CC=CC=C4)CO)O)O)NC(=O)CN(C)C(=O)C(C)N(C)C(=O)C(C)N(C)C(=O)C(CC5=CC=CC=C5)NC(=O)C	Active	Non-active	Active	Active	Non-active	Active-No
3043878	COC1COC(C(C1N)N)OC2C(CC(C(C2O)OC3C(C(CC(O3)CN)O)N)N)N.OS(=O)(=O)O.OS(=O)(=O)O.OS(=O)(=O)O	Active	Non-active	Active	Active	Non-active	Active
156855	C[C@@H](C[C@@H](C(=O)O)N)Cl	Active	Non-active	Active	Active	Non-active	Active-No
6449406	CC1/C=C\C=C/C=C/C=C/C=C/C=C/C=C/C(CC2C(C(CC(O2)(CC(CC(CC(CC(CC(=O)CC(CC(=O)OC1C(C)CCC(CC(=O)C3=CC=C(C=C3)N)O)O)O)O)O)O)O)O)C(=O)OC)OC4C(C(C(C(O4)C)O)N)O	Active	Non-active	Active	Active	Non-active	Active
6439161	COC1=CC=C(C=C1)/C=C(/C2(CC3(C2CC(=O)C=C3)O)[N+]#[C-])\[N+]#[C-]	Active	Non-active	Active	Active	Non-active	Active
31326	CC1CCC23CCC(=O)C2C1(C(CC(C(C3C)O)(C)C=C)OC(=O)CO)C	Active	Non-active	Active	Active	Non-active	Active
84059	CC1=C(N=C(N=C1N)C(CC(=O)N)NCC(C(=O)N)N)C(=O)NC(C(C2=CN=CN2)OC3C(C(C(C(O3)CO)O)O)OC4C(C(C(C(O4)CO)O)OC(=O)N)O)C(=O)NC(C)C(C(C)C(=O)NC(C(C)O)C(=O)NCCC5=NC(=CS5)C6=NC(=CS6)C(=O)NCCCNCCCN=C(CC7CCC(CC7)Cl)N)O	Active	Non-active	Active	Active	Non-active	Active-No
6536774	CC[N+](C)(C/C=C/C1=C(N2[C@@H]([C@@H](C2=O)NC(=O)/C(=N\OCF)/C3=NSC(=N3)N)SC1)C(=O)[O-])CC(=O)N	Active	Non-active	Active	Active	Non-active	Active
133973	CC1[C@H](CC2=C3C(=O)[C@@H](NC3=C(C=C2N1C(=O)C4=CC5=CC(=C(C(=C5N4)OC)OC)OC)O)C(=O)OC)Cl	Active	Non-active	Active	Active	Non-active	Active
6440840	C[C@@H]1[C@H]([C@@H]([C@@H]([C@@H](O1)OC/2CC3C(C(CC(O3)(CC(CC(C(CCC(=O)OC(CCC/C=C\C=C\C=C\C=C2)C(C)C)O)O)O)O)O)C(=O)O)O)N)O	Active	Non-active	Active	Active	Non-active	Active
59725	CC(C)[C@@H](C(=O)NC(C1CN2C(O1)CC2=O)C(C(=O)O)O)N	Active	Non-active	Active	Active	Non-active	Active
198286	CC1C(C(C(C(O1)OC2C(OC(CC2O)N3C=CC(=NC3=O)NC(=O)C4=CC=C(C=C4)NC(=O)C(C)(CO)N)C)O)O)N(C)C	Active	Non-active	Active	Non-active	Active	Active-No
174828	COC1=CC=CC2=C1C(=CN2[C@@H]3[C@H]([C@H](C[C@H](O3)C(=O)OC)O)O)CC#N	Active	Non-active	Active	Non-active	Non-active	Active
150178	CC[C@]1(C[C@@H](C2=C([C@H]1C(=O)OC)C=C3C(=C2O)C(=O)C4=C(C3=O)C=CC=C4O)O[C@H]5C[C@@H]([C@@H]([C@@H](O5)C)O)N)O	Active	Non-active	Active	Active	Non-active	Active
83970	C[C@H]1[C@H]([C@H](C[C@@H](O1)O[C@H]2C[C@@](CC3=C(C4=C(C(=C23)O)C(=O)C5=C(C4=O)C=CC=C5OC)O)([C@H](CO)O)O)N)O	Active	Non-active	Active	Active	Non-active	Active
6449106	CCCCCCC1CC(=O)CCCC(CC(=O)C2=C(C(CC2/C=C(/C=C/C=C/C(=O)N1)\C)OC3CC(C(C(O3)C)O)OC)O)O	Active	Non-active	Active	Active	Non-active	Active
6445461	CCC(=O)OC1C(OC(CC1(C)O)OC2C(OC(C(C2N(C)C)O)OC3C(CC(C(/C=C/C4C(O4)CC(OC(=O)CC(C3OC)OC(=O)C)C)O)C)CC=O)C)C	Active	Non-active	Active	Active	Non-active	Active
6437358	C[C@@H]1/C=C/[C@@H]2[C@](O2)([C@H](C[C@H](OC(=O)[C@H]3[C@@H](O3)C[C@@H]4C[C@H]1OC(=O)C4)[C@H](C)[C@H](/C(=C/C=C/C(=C/C5=COC(=N5)C)/C)/C)OC)O)C	Active	Non-active	Active	Active	Non-active	Active
3080364	CC(C)CC1C(=O)N(C(C(=O)NC(C(=O)N(C(C(=O)OC(C(=O)N(C(C(=O)NC(C(=O)N(C(C(=O)N2CCCC2C(=O)N1)CC3=CC=CC=C3)C)CC4=CC=CC=C4)C(C)C)C)C(C)C)C(C)(C)O)C)CC(C)C)C(C)C)C	Active	Non-active	Active	Active	Non-active	Active
3043876	C1C(C(C(C(C1N)OC2C(C(C(C(O2)CO)O)O)N)O)OC3C(C(C(CO3)O)O)N)N	Active	Non-active	Active	Active	Non-active	Active
43942	CC1C(C(CC(O1)OC2C[C@@](CC3=C(C4=C(C(=C23)O)C(=O)C5=C(C4=O)C=CC=C5O)O)(C(C)O)O)N)O	Active	Non-active	Active	Active	Non-active	Active
197202	CC[C@]1(C[C@@H](C2=C([C@H]1C(=O)OC)C=C3C(=C2O)C(=O)C4=C(C3=O)C=CC=C4O)O[C@H]5C[C@@H]([C@@H]([C@@H](O5)C)O[C@H]6C[C@@H]([C@@H]([C@@H](O6)C)O[C@H]7CC[C@@H]([C@@H](O7)C)O)O)N(C)C)O	Active	Non-active	Active	Active	Non-active	Active
194399	CC(C1CCC(C(O1)OC2C(CC(C(C2O)N(C)C(=O)CN)OC)N)N)N	Active	Non-active	Active	Active	Non-active	Active
162898	CON1[C@@H]2C(=O)NC3(C1=O)[C@H](C4=CC(=C(C=C4O3)O)Cl)SS2	Active	Non-active	Active	Active	Non-active	Active
152700	CCC1(CC(C2=C(C1C(=O)OC)C=C3C(=C2O)C(=O)C4=C(C3=O)C=CC=C4O)OC5CC(C(C(O5)C)OC6CC(C(C(O6)C)OC7CC(C(C(O7)C)O)O)O)N(C)C)O	Active	Non-active	Active	Active	Non-active	Active
152641	CC[C@]1(C[C@@H](C2=C([C@H]1C(=O)OC)C=C3C(=C2O)C(=O)C4=C(C=CC(=C4C3=O)O)O)O[C@H]5C[C@@H]([C@@H]([C@@H](O5)C)O[C@H]6C[C@@H]([C@@H]([C@@H](O6)C)O[C@H]7CC[C@H]([C@@H](O7)C)O)O)N(C)C)O	Active	Non-active	Active	Active	Non-active	Active
150200	CC[C@]1(C[C@@H](C2=C([C@H]1C(=O)OC)C=C3C(=C2O)C(=O)C4=C(C3=O)C=CC=C4O)O[C@H]5C[C@@H]([C@@H]([C@@H](O5)C)O[C@H]6C[C@@H]([C@@H]([C@@H](O6)C)O[C@H]7CCC(=O)[C@@H](O7)C)O)NC)O	Active	Non-active	Active	Active	Non-active	Active
133779	C1=C(C=C(C(=C1Cl)O)C(=O)C2=CC(=C(N2)Cl)Cl)Cl	Active	Non-active	Active	Non-active	Non-active	Active
122802	CC[C@]1(C[C@@H](C2=C([C@H]1C(=O)OC)C=C3C(=C2O)C(=O)C4=C(C=CC(=C4C3=O)O)O)OC5CC(C(C(O5)C)OC6CC(C(C(O6)C)OC7CCC(=O)C(O7)C)O)N(C)C)O	Active	Non-active	Active	Active	Non-active	Active
99299	CC[C@]1(CC(C2=C([C@H]1C(=O)OC)C=C3C(=C2O)C(=O)C4=C(C3=O)C=CC=C4O)O[C@H]5C[C@@H]([C@@H]([C@@H](O5)C)O[C@H]6C[C@H]7[C@@H]([C@@H](O6)C)O[C@H]8[C@@H](O7)CC(=O)[C@@H](O8)C)N(C)C)O	Active	Non-active	Active	Active	Non-active	Active
54691486	CC[C@@H](C)C[C@H](C)/C=C(\C)/[C@@H]1C(=CCC(O1)C2=C(C(=CN(C2=O)C)C3[C@H]([C@@H]([C@@H]([C@@H]3O)O)O)O)O)C	Active	Non-active	Active	Active	Non-active	Active
5487121	CO[C@H]1[C@H]([C@@H](O[C@@H]1[C@H](C(=O)N)O[C@@H]2[C@H]([C@H](C=C(O2)C(=O)N[C@H]3CCCCNC3=O)O)O)N4C=CC(=O)NC4=O)O	Active	Non-active	Active	Non-active	Active	Active-No
3050592	CC[C@]1(C[C@@H](C2=C([C@H]1C(=O)OC)C=C3C(=C2O)C(=O)C4=C(C=CC(=C4C3=O)O)O)O[C@H]5C[C@@H]([C@@H]([C@@H](O5)C)O[C@H]6C[C@@H]([C@@H]([C@@H](O6)C)O[C@H]7CCC(=O)[C@H](O7)C)O)N(C)C)O	Active	Non-active	Active	Active	Non-active	Active-No
27662	C1C=CC(C=C1)CC(C(=O)O)N	Active	Non-active	Active	Non-active	Non-active	Active-No
216479	CC1CC(=O)C(C(O1)OC2C(CC(C(=O)C(C(C(C(OC(=O)C(C(C2C)OC3CC(C(C(O3)C)O)(C)O)C)C(C)COC4C(C(C(C(O4)C)O)OC)OC)C)OC(=O)C(C(C)C)O)C)(C)O)C)O	Active	Non-active	Active	Active	Non-active	Active-No
170676	C[C@H]1[C@H]([C@H]([C@@](OC1[C@H]2CC[C@H](O2)C3CCC(O3)[C@@]4([C@@H]([C@H](C5(O4)[C@@H]([C@@H](C[C@H](O5)C[C@H]6[C@]([C@H]([C@H](C(O6)[C@@H](C)C(=O)OO)C)OC)(C)O[C@H]7CC[C@@H]([C@H](O7)C)OC)OC)C)C)OC)C)(C)O)C)O	Active	Non-active	Active	Active	Non-active	Active
16132368	C1C2C(=O)NC(C3=CC(=CC(=C3)O)OC4=C(C=CC(=C4)C(C(=O)N2)N)OC5C(C(C(C(O5)CO)O)O)O)C(=O)NC6C7=CC(=C(C(=C7)OC8=C(C=C(C=C8)C(C9C(=O)NC(C2=CC(=CC(=C2C2=CC(=CC(=C2O)Cl)C(C(=O)N9)NC6=O)O)O)C(=O)O)O)Cl)O)OC2=C(C=C1C=C2)Cl	Active	Non-active	Active	Active	Non-active	Active
6446067	CCC1C(/C=C(/C=C/C(=O)C(CC(C(C(C(CC(=O)O1)O)C)OC2C(C(CC(O2)C)N(C)C)O)CCO)C)\C)C	Active	Non-active	Active	Active	Active	Active
6436532	CCC1C(/C=C\C(=O)C(CC(C(C(C(=O)C(C(=O)O1)C)C)OC2C(C(CC(O2)C)N(C)C)O)C)C)(C)O	Active	Non-active	Active	Active	Active	Active-No
3086479	C1=C([C@@H]([C@H]([C@@H]([C@@H]1N[C@@H]2[C@@H]([C@@H]([C@H]([C@@H]([C@H]2O)O)O[C@@H]3[C@H]([C@@H]([C@H]([C@@H](O3)CO)O)O)O)CO)O)O)O)O)CO	Active	Non-active	Active	Non-active	Non-active	Active-No
3055896	CNC1C(CC(C(C1O)OC2C(CCC(O2)CN)N)N)O	Active	Non-active	Active	Active	Non-active	Active
3045997	C1[C@@H](C(=O)N1[C@H](C2=CC=C(C=C2)O)C(=O)O)NC(=O)C(=O)C3=CC=C(C=C3)OCC[C@H](C(=O)O)N	Active	Non-active	Active	Active	Non-active	Active
3035519	CN([C@H]1CN=C(NC1=O)NC(=O)N)C(=O)C[C@H](CCCN=C(N)N)N	Active	Non-active	Active	Non-active	Active	Active-No
283138	CC1C2=C(C3C(O1)CC(=O)O3)C(=O)C4=C(C2=O)C(=CC=C4)O	Active	Non-active	Active	Active	Non-active	Active
3043454	C1[C@H]([C@@H]([C@H]([C@@H]([C@H]1N)O[C@@H]2[C@@H]([C@H]([C@@H]([C@H](O2)CO)O)O)N)O[C@H]3[C@@H]([C@H]([C@H](O3)CO)O)O)O)N	Active	Non-active	Active	Non-active	Active	Active-No
16131420	CCC(C)CCCCCCC(=O)N[C@@H](CC1=CNC2=CC=CC=C21)C(=O)N[C@@H](CC(=O)N)C(=O)N[C@@H](CC(=O)O)C(=O)N[C@H]3[C@H](OC(=O)[C@@H](NC(=O)[C@@H](NC(=O)[C@H](NC(=O)CNC(=O)[C@@H](NC(=O)[C@H](NC(=O)[C@@H](NC(=O)[C@@H](NC(=O)CNC3=O)CCCN)CC(=O)O)C)CC(=O)O)CO)[C@H](C)CC(=O)O)CC(=O)C4=CC=CC=C4N)C	Active	Non-active	Active	Active	Non-active	Active
209916	C1[C@@H]([C@H]([C@@H]([C@H]([C@@H]1N)O[C@@H]2[C@@H]([C@H]([C@@H]([C@H](O2)CO)O)N)O)O)O)N	Active	Non-active	Active	Active	Non-active	Active
163560	CC(C)(C=C)C12CC3C(=O)N4C(CC5(C4NC6=CC=CC=C65)C(C)(C)C=C)C(=O)N3C1NC7=CC=CC=C27	Active	Non-active	Active	Active	Active	Active-No
54706138	CC1=CC=C(N1)C(=O)O[C@H]2[C@H]([C@@H](OC([C@@H]2OC)(C)C)OC3=C(C4=C(C=C3)C(=C(C(=O)O4)NC(=O)C5=CC(=C(C=C5)O)CC=C(C)C)O)Cl)O	Active	Non-active	Active	Active	Non-active	Active-No
6444219	C(CC/C=C/C=C/C(=O)CCC/C=C/C=C/CCCCC(CC(CC(C(C(=O)NCC(=O)O)O)O)O)O)CCN(C(=N)N)O	Active	Non-active	Active	Active	Non-active	Active
6435763	CC1=C(C=C2C(=C1O)C(=O)[C@](C(C2=O)(C/C=C(\C)/CCC=C(C)C)O)(CC=C(C)C)Cl)O	Active	Non-active	Active	Active	Active	Active-No
3040645	C1C(OC(C(C1O)N)OC2C(CC(C(C2OC3C(C(C(O3)CO)O)O)O)NC(=O)C(CCN)O)N)CN	Active	Non-active	Active	Active	Non-active	Active
6448374	CC1CC(C(C(/C=C(/C(C(/C=C/C=C(/C(=O)NC2=C(C(=CC(=C2)O)C1OC)O)\C)C)OC(=O)N)\C)C)OC)O	Active	Non-active	Active	Active	Non-active	Active
3067214	C1=NC2=C(C(=N1)N)N=CN2[C@H]3[C@@H]([C@@H]([C@H](O3)CNCCCC(C(=O)O)N)O)O	Active	Non-active	Active	Active	Non-active	Active
16132068	C[C@@H]1[C@@H](C(=O)NCC(=O)N[C@H](C(=O)N[C@H](C(=O)N[C@@H](C(=O)N[C@H](C(=O)NCC(=O)N[C@@H](C(=O)N[C@H](C(=O)N[C@H](C(=O)O1)CC(=O)C2=CC=CC=C2N)[C@H](C)CC(=O)O)CO)CC(=O)O)C)CC(=O)O)CCCN)NC(=O)[C@H](CC(=O)O)NC(=O)[C@H](CC(=O)N)NC(=O)[C@H](CC3=CNC4=CC=CC=C43)NC(=O)CCCCCCCCC(C)C	Active	Non-active	Active	Active	Non-active	Active
3086408	C[C@H]1[C@H]([C@H](CC(O1)OC)OC(=O)C2=CC(=C(C=C2NC(=O)C(=C)OC)OC)OC)O	Active	Non-active	Active	Active	Active	Active-No
23711637	CC(C1OC2(CC[C@@H](C)[C@@H](CC3=NC4=C(O3)C=CC(O)=C4C(O)=O)O2)CC[C@H]1C)C(=O)C1=CC=CN1	Active	Non-active	Active	Active	Non-active	Active
6436814	CC1CCC(=O)C(C1(C)/C=C\C(=C\CC2=C(C(=C(C(=C2O)Cl)C)C=O)O)\C)C	Active	Non-active	Active	Active	Non-active	Active
3067464	CC1=C2C3C4C(C5(CO5)C(O3)(O4)C(OC)OC)(OC2=C6C(=C1)C(=C7C(CC(C(=O)C7=C6O)O)O)OC)O	Active	Non-active	Active	Active	Non-active	Active
23681629	CCC1(CCC(O1)C2(CCC3(O2)CC(C(C(O3)C(C)C(C(C)C(=O)[O-])OC)C)O)C)C4C(CC(O4)C5C(CC(C(O5)(COC(=O)NCCC6=CC=CC=C6)O)C)C)C	Active	Non-active	Active	Non-active	Non-active	Active
3042767	CCCC(=O)NC1C(OC(C(C1O)O)OC(C(CN)O)C(C(CO)O)N)CO	Active	Non-active	Active	Non-active	Active	Active-No
6445434	CCC(=O)OC1CC(=O)OC(CC2C(O2)/C=C/C(C(CC(C(C1OC)OC3C(C(C(C(O3)C)OC4CC(C(C(O4)C)OC(=O)CC)(C)O)N(C)C)O)CC=O)C)OC(=O)CC)C	Active	Non-active	Active	Active	Non-active	Active
3072005	CC1=CC(=C(C2=C1OC3=C(C2=O)C=C(N3[C@H]4[C@@H]([C@H]([C@@H]([C@H](O4)CO)OC)O)O)Cl)O)Cl	Active	Non-active	Active	Active	Non-active	Active
16132067	CCC(C)CCCCCCCCC(=O)N[C@@H](CC1=CNC2=CC=CC=C21)C(=O)N[C@@H](CC(=O)N)C(=O)N[C@@H](CC(=O)O)C(=O)N[C@H]3[C@H](OC(=O)[C@@H](NC(=O)[C@@H](NC(=O)[C@H](NC(=O)CNC(=O)[C@@H](NC(=O)[C@H](NC(=O)[C@@H](NC(=O)[C@@H](NC(=O)CNC3=O)CCCN)CC(=O)O)C)CC(=O)O)CO)[C@H](C)CC(=O)O)CC(=O)C4=CC=CC=C4N)C	Active	Non-active	Active	Active	Non-active	Active
442530	C[C@@H]1CC2=C(C=C(C(=C2C(=O)O1)O)C(=O)N[C@@H](CC3=CC=CC=C3)C(=O)O)Cl	Active	Non-active	Active	Active	Non-active	Active
6444887	CCC(=O)OC\1CC2C(C(=O)C(C(/C=C(\C=C/C(C/C=C(\C=C1)/C)O)/C)NC(=O)C(=O)C)(C(=O)O2)C)C	Active	Non-active	Active	Active	Active	Active-No
3081509	CCC1(CC(C2=C(C3=C(C(=C2C1OC4CC(C(C(O4)C)OC5CCC(C(O5)C)OC6CCC(C(O6)C)O)N(C)C)O)C(=O)C7=C(C3=O)C(=CC=C7)O)O)OC8CC(C(C(O8)C)OC9CC(C(C(O9)C)OC1CCC(C(O1)C)O)O)N(C)C)O	Active	Non-active	Active	Active	Non-active	Active
23710502	CC1=C(C=CC2=C1OC(=O)C(=C2[O-])NC(=O)C3=CC(=C(C=C3)O)CC=C(C)C)OC4C(C(C(C(O4)(C)C)OC)OC(=O)N)O	Active	Non-active	Active	Active	Non-active	Active
5487705	CC(C)[C@@H](C(=O)NC(=O)[C@H](CC1=CC=CC=C1)N[C@@H](CC2=CC=C(C=C2)O)P(=O)(O)O)NC	Active	Non-active	Active	Active	Non-active	Active
130105	C(C(C(C(C1C(NC(=O)N1)O)O)O)O)O	Active	Non-active	Active	Active	Non-active	Active
54710959	C[C@H]1C[C@@H]([C@@H]([C@@H]2[C@@H]1[C@]\3([C@@H](C=C2)/C(=C\C[C@@H](/C(=C/[C@@H]4[C@H](C=C(CC45C(=O)/C(=C3\O)/C(=O)O5)C=O)OC(=O)C)/C)O[C@H]6C[C@]([C@H]([C@H](O6)C)NC(=O)OC)(C)[N+](=O)[O-])/C)C)O)C	Active	Non-active	Active	Active	Non-active	Active
54688679	CC[C@H](C(=O)NC/C=C/C=C(\C)/[C@H]([C@@H](C)[C@H]1[C@H]([C@H]([C@H](O1)/C=C/C=C/C=C(\C)/C(=C\2/C(=O)C=CN(C2=O)C)/O)O)O)OC)[C@@]3([C@@H]([C@@H](C([C@@H](O3)/C=C/C=C\C)(C)C)O)O)O	Active	Non-active	Active	Active	Non-active	Active
3037852	C/C(=C\1/[C@H]2CC(=C(N2C1=O)C(=O)O)SCCNC(=O)C)/CO	Active	Non-active	Active	Active	Non-active	Active
134991	CC(C)(CO)C(C(=O)NCCC(=O)NCCS[C@H]1C[C@@H]2[C@@H](C(=O)N2[C@H]1C(=O)O)C(C)(C)O)O	Active	Non-active	Active	Active	Non-active	Active
193884	C1CC(=NC1C(=O)NC2C(C(C(C(C2O)OC3C(C(C(C(O3)CO)OC4C(C(C(C(O4)CO)O)O)NC(=O)C(CCCN=C(N)N)N)O)O)OC(=O)N)O)O)N	Active	Non-active	Active	Active	Non-active	Active
3086037	CC1CC([C@@](OC1C2CC(C(O2)[C@@]3(CCC(O3)[C@@]4(CCC5(O4)CC(C(C(O5)C(C)C(C(C)C(=O)O)OC)C)O)C)C)C)(COC(=O)NCCC6=CC=CC=C6)O)C	Active	Non-active	Active	Active	Non-active	Active
24840144	CCC1(CCC(O1)C2(CCC3(O2)CC(C(C(O3)C(C)C(C(C)C(=O)O)OC)C)O)C)C4C(CC(O4)C5C(CC(C(O5)(COC(=O)NCCC6=CC=CC=C6)O)C)C)C	Active	Non-active	Active	Active	Non-active	Active
248000	CCC1CC2CCC(O2)C(C(=O)OC(CC3CCC(O3)C(C(=O)OC(CC4CCC(O4)C(C(=O)OC(CC5CCC(O5)C(C(=O)O1)C)C)C)CC)C)C)C	Active	Non-active	Active	Active	Non-active	Active
54690173	CC1C2C=CC3(CO3)C(O2)(OC1C(C)/C=C(\C)/C=C\C(=C/4\C(=O)C(N(C4=O)C5CCC(C(O5)C)O)C(C)C(=O)NC)\O)C	Active	Non-active	Active	Active	Non-active	Active
6326658	C[C@@H]1CCOC(=O)/C=C/C=C\C(=O)O[C@@H]2C[C@@H]3[C@]4([C@]2([C@]5(CCC(=C[C@H]5O3)C)COC(=O)[C@H]1O)C)CO4	Active	Non-active	Active	Active	Active	Active-No
125607	CCC1(CC(C2=C(C3=C(C(=C2C1OC4CC(C(C(O4)C)OC5CCC(C(O5)C)OC6CCC(C(O6)C)O)N(C)C)O)C(=O)C7=C(C3=O)C(=CC=C7)O)O)OC8CC(C(C(O8)C)OC9CCC(C(O9)C)OC1CCC(C(O1)C)O)N(C)C)O	Active	Non-active	Active	Active	Non-active	Active
54710994	CC[C@H](C(=O)NC/C=C/C=C(\C)/[C@@H](C(C)C1[C@H]([C@H](C(O1)/C=C/C=C/C=C(/C)\C(=C/2\C(=O)C=CN(C2=O)C)\O)O)O)OC)C3(C(C(C(C(O3)/C=C/C=C/C)(C)C)O)O)O	Active	Non-active	Active	Active	Non-active	Active
150560	CN1C=C(C=C1C(=O)NC2=CN(C(=C2)C(=O)NC3=CN(C(=C3)C(=O)NC4=CN(C(=C4)C(=O)NCCCN(C)C)C)C)C)NC=O	Active	Non-active	Active	Active	Non-active	Active
6917665	C1=NC2=C(C(=N1)N)N=CN2[C@H]3[C@@H]([C@@H]([C@H](O3)CC(CCC(C(=O)O)N)N)O)O	Active	Non-active	Active	Active	Non-active	Active
24839933	CC1CC(C(OC1C2CC(C(O2)C3(CCC(O3)C4(CCC5(O4)CC(C(C(O5)C(C)C6C(C(C(C(O6)(C(C)C(=O)O)O)C)OC)C)C)O)C)C)C)(C)O)C	Active	Non-active	Active	Active	Non-active	Active
11967973	C[C@@H]1[C@H]([C@@H](C[C@@H](O1)O[C@@H]2C[C@@H](O[C@@H]([C@H]2O)C)OC3=CC4=CC5=C(C(=O)[C@H]([C@@H](C5)[C@@H](C(=O)[C@H]([C@@H](C)O)O)OC)O[C@H]6C[C@H]([C@@H]([C@H](O6)C)O)O[C@H]7C[C@H]([C@@H]([C@H](O7)C)O)O[C@H]8C[C@H]([C@@H]([C@H](O8)C)OC)O)C(=C4C(=C3C)O)O)O)O	Active	Non-active	Active	Active	Non-active	Active
40586	CC1C2=C(CC(O1)CC(=O)O)C(=O)C3=C(C2=O)C(=CC=C3)O	Active	Non-active	Active	Active	Non-active	Active
6435893	CCC1C(=O)N(CC(=O)N(C(C(=O)NC(C(=O)N(C(C(=O)NC(C(=O)NC(C(=O)N(C(C(=O)N(C(C(=O)N(C(C(=O)N(C(C(=O)N1)[C@@H]([C@H](C)C/C=C/C)O)C)C(C)C)C)CC(C)C)C)CC(C)C)C)C)C)CC(C)C)C)C(C)C)CC(C)C)C)C	Active	Non-active	Active	Active	Non-active	Active
24837308	C/C=C(/C(=O)OC1C(OC(C(C1OC2CC(C(C(O2)C)(C(C)OC(=O)C(C)C)O)OC)O)C3(CC(=O)C(=C(C3=O)C(=O)O)N)O)COC(=O)C)\NC(=S)SCC(C(=O)O)NC(=O)C	Active	Non-active	Active	Active	Non-active	Active
6443657	CCC1C(CC(CCCC(CC(CC(C(C(/C=C\C=C/C=C\C=C/C=C\C(C(OC1=O)C)C)O)C)O)O)O)O)O	Active	Non-active	Active	Active	Non-active	Active
6433554	C[C@@H]1[C@H]([C@@H]([C@H]([C@@H](O1)O[C@@H]2[C@H](O[C@H]([C@@H]([C@H]2O)NC(=O)C)O[C@@H]3[C@H]([C@]([C@H](O[C@@H]3OP(=O)(O)OC[C@H](C(=O)OCC/C=C(\C)/CC/C=C/C(C)(C)CCC(=C)C/C=C(\C)/CCC=C(C)C)O)C(=O)O)(C)O)OC(=O)N)CO[C@H]4[C@@H]([C@H]([C@@H]([C@H](O4)CO)O)O)O)NC(=O)C)O)O[C@H]5[C@@H]([C@H]([C@H]([C@H](O5)C(=O)NC6=C(CCC6=O)O)O)O)O	Active	Non-active	Active	Active	Non-active	Active
194619	CCCCCCCCCC1CCCC(=O)NC(C(=O)NC(C(=O)N2CCCC2C(=O)NC(C(=O)NC(C(=O)NC(C(=O)O1)C(C)C)CC3=CC=CC=C3O)CCC(=O)N)C)C(C)O	Active	Non-active	Active	Active	Active	Active-No
16218982	CC[C@]1(C[C@@H](C2=C([C@H]1C(=O)OC)C=C3C(=C2O)C(=O)C4=C(C3=O)C=CC=C4O)O[C@H]5C[C@@H]([C@@H]([C@@H](O5)C)O[C@H]6C[C@@H](C([C@@H](O6)C)O[C@H]7CCC(=O)[C@@H](O7)C)O)N(C)C)O	Active	Non-active	Active	Active	Non-active	Active
23670895	C1C(=C(N2[C@H](S1)[C@@H](C2=O)NC(=O)/C(=N/O[C@@H](C3=CC(=C(C=C3)O)O)C(=O)O)/C4=CSC(=N4)N)C(=O)[O-])/C=C/CN5C=NC(=CC5=N)N	Active	Non-active	Active	Active	Non-active	Active
3045994	CNC(CCN=C(N)N)CC(=O)NC1CNC(=O)C(NC(=O)/C(=C\NC(=O)N)/NC(=O)C(NC(=O)C(NC1=O)CO)CO)C2CC(N=C(N2)N)O	Active	Non-active	Active	Active	Non-active	Active
512870	C[C@@]1(CO[C@@H]([C@@H]([C@H]1NC)O)O[C@H]2[C@@H](C[C@@H]([C@H]([C@@H]2O)O[C@@H]3[C@@H]([C@H]([C@@H]([C@H](O3)CN)O)O)N)N)N)O	Active	Non-active	Active	Active	Non-active	Active
24846867	C1=CC(=O)C=CC1=C(C2=CC=C(C=C2)O)C3=CC=C(C=C3)S	Active	Non-active	Active	Active	Non-active	Active-No
275961	CC1=C(C(=O)C2=C(C1=O)N3CC4C(C3(C2COC(=O)N)O)N4C)N	Active	Non-active	Active	Active	Non-active	Active
119072	C[C@@H]1CC2=C(C(=C3C(=C2)C=C(C(=C3O)C4=C(C5=C(C6=C(C[C@H](OC6=O)C)C=C5C=C4OC)O)O)OC)O)C(=O)O1	Active	Non-active	Active	Active	Non-active	Active
54679292	CCC(C(=O)NC/C=C/C=C(/C)\[C@@H]([C@@H](C)C([C@H](/C=C\C=C\C=C\C=C(/C)\C(=C/1\C(=O)C=CN(C1=O)C)\O)O)O)OC)[C@@]2(C[C@@H](C([C@@H](O2)/C=C/C=C\C)(C)C)O)O	Active	Non-active	Active	Active	Non-active	Active
24833818	CN(C1C(C(C(OC1NC2=NC3C(N2)C(CNC3=O)O)CO)O)OC(=O)N)C(=O)CN=CN	Active	Non-active	Active	Active	Non-active	Active
335958	CC1C(C(CC(O1)C2=C(C3=C(C=C2)C(=O)C4=C(C3=O)C=CC(=C4)CC(C)(CC(=O)O)O)O)O)O	Active	Non-active	Active	Non-active	Non-active	Active
24836690	CC1CC(C(OC1C2CCC(O2)C3CCC(O3)C4(C(C(C5(O4)C(C(CC(O5)CC6C(C(C(C(O6)(C(C)C(=O)O)O)C)OC7CCC(C(O7)C)OC)C)OC)C)C)OC)C)(C)O)C	Active	Non-active	Active	Active	Non-active	Active
23698022	CC1CC(C(OC1C2CCC(O2)C3CCC(O3)C4(C(C(C5(O4)C(C(CC(O5)CC6C(C(C(C(O6)(C(C)C(=O)[O-])O)C)OC7CCC(C(O7)C)OC)C)OC)C)C)OC)C)(C)O)C	Active	Non-active	Active	Active	Non-active	Active
282522	CC1C2C=C(C3C2(C=C1C)C4(CO4)C(=O)OC3)C(=O)O	Active	Non-active	Active	Active	Non-active	Active
6442491	CCCCC(C)C(=O)OC1[C@@H]([C@H](O[C@]2([C@@H]1O)C[C@@H]3C[C@H](O2)C/C=C(/C[C@H](/C=C/C=C/4\CO[C@H]5[C@@]4(C(C=C([C@H]5OC)C)C(=O)O3)O)C)\C)C)C	Active	Non-active	Active	Active	Non-active	Active
16132391	CCC(C)C1C(=O)NC(CSCC(C(=O)NC(C(=O)NC(C(=O)N1)CC2=CC=CC=C2)CCCCN)NC(=O)C(C)NC(=O)C(C(C)CC)N)C(=O)NC3C(SCC(NC(=O)CNC(=O)C4CCCN4C3=O)C(=O)NC(C)C(=O)NC(CCCCN)C(=O)N/C(=C\C)/C(=O)NCC(=O)NC5CSCC6C(=O)N/C=C\SCC(C(=O)NC(C(=O)N6)CC7=CC=C(C=C7)O)NC(=O)C(NC(=O)C(NC5=O)CC8=CC=CC=C8)CC(=O)N)C	Active	Non-active	Active	Active	Non-active	Active-No
9578507	C[C@H]1CC[C@]2(C[C@@H]3C[C@H](O2)C/C=C(/[C@H]([C@H](/C=C/C=C/4\CO[C@H]\5[C@@]4([C@@H](C=C(/C5=N/O)C)C(=O)O3)O)C)O[C@H]6C[C@@H]([C@H]([C@@H](O6)C)O)OC)\C)O[C@@H]1C7CCCCC7	Active	Non-active	Active	Non-active	Non-active	Active
6439824	CC(/C=C/C1C(C=CC(=O)O1)O)(C(CC(/C=C/C=C/C=C/CO)O)OP(=O)(O)O)O	Active	Non-active	Active	Active	Non-active	Active
191478	CCC(C1C(CC(C(O1)C(C)C(C(C)C(=O)C(CC)C2C(CC(C3(O2)C=CC(=O)C4(O3)CCC(O4)(C)C5CCC(C(O5)C)(CC)O)C)C)O)C)C)C(=O)O	Active	Non-active	Active	Active	Non-active	Active-No
5459153	CC1CC12C(=O)OCC(C(=O)NC(C(=O)N(C3C(SCC(C(=O)N2C)N(C(=O)CNC(=O)C(COC(=O)C4(CC4C)N(C3=O)C)NC(=O)C5=NC6=CC=CC=C6C=C5O)C)SC(C)C)C)C)NC(=O)C7=NC8=CC=CC=C8C=C7O	Active	Non-active	Active	Active	Non-active	Active
353396	CN1C2C[C@@H](C1[C@H]3CC4=C([C@@H]5N3[C@H]2OC5)C(=CC=C4)OC)C(=O)O	Active	Non-active	Active	Active	Non-active	Active
5351598	CC[C@H](C[C@H]1CCC[C@]2(O1)C[C@H]3[C@@H]([C@@H](O2)C[C@]4([C@@H](CC(O4)(C)C)/C=C/CCCCC[C@@]([C@@H]([C@H]([C@@H]([C@H]([C@@H]([C@](/C=C/C(=O)O3)(C)O)O)C)O)OC5CCC(C(O5)C)N(C)C)O)(C)O)O)C)O	Active	Non-active	Active	Active	Active	Active-No
56927747	CC[C@@H]1[C@@H](/C=C/C(=O)[C@@H](C[C@@H]([C@@H]([C@H](C(=O)O1)C)O[C@H]2[C@@H]([C@H](C[C@H](O2)C)[NH+](C)C)O)C)C)C	Active	Non-active	Active	Active	Non-active	Active
6917933	C[C@@H]1[C@H]([C@@H](C[C@@H](O1)O[C@@H]2[C@H](O[C@]3(C[C@H]2O)O[C@@H]4[C@H](O[C@H]([C@H]([C@]4(O3)C)O)O[C@@H]5[C@H]([C@@H](O[C@@H]([C@@H]5OC)C)O[C@@H]6[C@H](O[C@H]([C@H]([C@H]6O)OC)O[C@H]7[C@@H]([C@H]8[C@H](CO7)O[C@@]9(O8)[C@H]1[C@H]([C@@H](CO9)OC(=O)C2=C(C=C(C=C2C)O)O)OCO1)O)COC)O)C)C)O[C@H]1C[C@]([C@H]([C@@H](O1)C)OC)(C)[N+](=O)[O-])OC(=O)C1=C(C(=C(C(=C1OC)Cl)O)Cl)C	Active	Non-active	Active	Active	Non-active	Active
24836138	CC1/C=C/C=C/C=C/C=C/C=C/C=C/C=C/C(CC(C(C(CC(=O)CC(CC(CC(CC(=O)CCCC(=O)CC(=O)OC1C(C)CC(C)C(CC(=O)C2=CC=C(C=C2)N)O)O)O)O)O)C(=O)O)O)O[C@H]3C([C@@H]([C@@H](C(O3)C)O)N)O	Active	Non-active	Active	Active	Non-active	Active
16129688	CCCCCCCCCC(=O)NC(CC1=CNC2=CC=CC=C21)C(=O)NC(CC(=O)N)C(=O)NC(CC(=O)O)C(=O)NC3C(OC(=O)C(NC(=O)C(NC(=O)C(NC(=O)CNC(=O)C(NC(=O)C(NC(=O)C(NC(=O)C(NC(=O)CNC3=O)CCCN)CC(=O)O)C)CC(=O)O)CO)C(C)CC(=O)O)CC(=O)C4=CC=CC=C4N)C	Active	Non-active	Active	Active	Non-active	Active-No
284691	CC1C(C=C(C(=O)O1)C2C(O2)C)O	Active	Non-active	Active	Active	Non-active	Active-No
54607769	C(CCN=C(N)N)CC(CC(=O)NC(C(=O)NCCCCNCCCN)O)O	Active	Non-active	Active	Active	Non-active	Active
16130058	CC(=O)OC1CC=NN2C1C(=O)NCC(=O)N(CC(=O)N(C(C(=O)OCC(C(=O)N3C(CCCN3)C(=O)NCC(=O)N(CC(=O)N(C(C(=O)OCC(C2=O)NC(=O)C4=C(C=C5C=C(C=CC5=N4)OC)O)C(C)(C)O)C)C)NC(=O)C6=C(C=C7C=C(C=CC7=N6)OC)O)C(C)(C)O)C)C	Active	Non-active	Active	Active	Non-active	Active-No
6474067	C[C@@H]1/C=C\C=C(\C(=O)NC2=C(C(=C3C(=C(C(=C4C3=C(/C(=C/[C@@]([C@@H]([C@H]([C@H]([C@@H]([C@@H]([C@@H](C1O)C)O)C(=O)O)O)C)O)(C)O)/C)OCO4)C)O)C2=O)OC(=O)C)C)/C	Active	Non-active	Active	Non-active	Active	Active-No
16219182	C[C@@H]([C@H]1O[C@@]2(CC[C@@H](C)[C@@H](CC3=NC4=C(O3)C=CC(N)=C4C(O)=O)O2)[C@H](C)C[C@H]1C)C(=O)C1=CC=CN1	Active	Non-active	Active	Active	Non-active	Active
96578	CC1=NC=C(O1)C2=CNC3=CC=CC=C32	Active	Non-active	Active	Active	Non-active	Active
127410	CC1C(C(CC(O1)OC2C(OC(CC2(C)O)OC(C34C5(CO5)C6(C(O3)C(O4)C7=C(C=C8C(=C7O6)C(=C9C(=O)C(CC(C9=C8OC)OC1CC(C(C(O1)C)OC(=O)C)(C)O)O)O)C)OC)OC)C)(C)O)O	Active	Non-active	Active	Non-active	Non-active	Active-No
57369629	C[C@@H](C(=O)N[C@@H](CCC(=O)N)C(=O)NC(C)(C)C(=O)N[C@@H](C(C)C)C(=O)NC(C)(C)C(=O)NCC(=O)N[C@@H](CC(C)C)C(=O)NC(C)(C)C(=O)N1CCC[C@H]1C(=O)N[C@@H](C(C)C)C(=O)NC(C)(C)C(=O)NC(C)(C)C(=O)N[C@@H](CCC(=O)O)C(=O)N[C@@H](CCC(=O)N)C(=O)N[C@@H](CC2=CC=CC=C2)CO)NC=O	Active	Non-active	Active	Active	Non-active	Active
57369870	CCCC=CC=CC(=O)NC(CC(=O)N)C(=O)NC(CC(=O)N)C(=O)NC(C1CCC(CC1)O)C(=O)NC(CCCN)C(=O)NC(C(C)O)C(=O)NC(C2CCC(CC2)O)C(=O)NC(C3CCC(CC3)O)C(=O)NC(C(C)O)C(=O)NC(CC4=CC=CC=C4)C(=O)NC(CCCN)C(=O)NC(C5CCC(CC5)O)C(=O)NC(C(C)O)C(=O)NC(C6CCC(CC6)O)C(=O)NCC(=O)NCCC(C)C	Active	Non-active	Active	Active	Non-active	Active
195788	CCCCCC1=C2C(=CC(=C1)O)C(=O)C3=CC(=CC(=C3C2=O)O)O	Active	Non-active	Active	Active	Non-active	Active
53471688	CC(C[C@@H](C(=O)O)N)Cl	Active	Non-active	Active	Active	Non-active	Active
53384884	CC[C@H](C)[C@@H]1[C@H](C=CC2(O1)C[C@@H]3C[C@H](O2)C/C=C(/[C@H]([C@H](/C=C/C=C/4\CO[C@H]5[C@@]4([C@@H](C=C([C@H]5O)C)C(=O)O3)O)C)O[C@@H]6C[C@H]([C@@H]([C@H](O6)C)O[C@H]7C[C@@H]([C@H]([C@@H](O7)C)O)OC)OC)\C)C	Active	Non-active	Active	Non-active	Non-active	Active
4948	C1C(=C(N2C(S1)C(C2=O)NC(=O)C(C3=CC=C(C=C3)O)N)C(=O)O)CSC4=NNN=C4	Active	Non-active	Active	Active	Non-active	Active
57369723	CC1CCC2(CC3CC(O2)CC=C(CC(C=CC=C4COC5C4(C(C=C(C5O)C)C(=O)O3)O)C)C)OC1C	Active	Non-active	Active	Active	Non-active	Active-No
57353401	C[C@@H]1CCC[C@@H]([C@@H]1[C@H](C)C(=C2C(=O)COC2=O)O)C=C(CO)[C@H]3[C@@H](CC[C@H](O3)C=C[C@H](C)C4[C@H](C[C@@H](O4)[C@H](C)OC)C)C	Active	Non-active	Active	Active	Non-active	Active-No
163421	CC[C@H]1[C@H]([C@@H](CC(=CC=C[C@@H](C(OC(=O)C(=CC(=C[C@H]([C@H]1O)C)C)OC)[C@@H](C)[C@H]([C@H](C)[C@]2(C[C@H]([C@@H]([C@H](O2)C=CC)C)OC(=O)C=CC(=O)NC3=C(CCC3=O)O)O)O)OC)C)C)O	Active	Non-active	Active	Active	Non-active	Active
191997	CCC1C(C(OC(C1(C)OC)CC2CC(C(C3(O2)C(C(C(O3)(C)C4CCC(O4)C5CCC(O5)C6C(C(C(C(O6)(C)O)C)OC7CCC(C(O7)C)OC)C)OC8CCC(C(O8)C)OC)C)C)OC)(C(C(=O)O)O)O)O	Active	Non-active	Active	Active	Non-active	Active
123891	CC1=C(N2[C@@H]([C@@H](C2=O)NC(=O)C(=NOC)C3=CSC(=N3)N)SC1)C(=O)O	Active	Non-active	Active	Active	Non-active	Active
19082597	C1C(C(C(C(C1NC(=O)C(CCN)O)OC2C(C(C(C(O2)CO)O)N)O)O)OC3C(C(C(C(O3)CN)O)O)O)N.OS(=O)(=O)O	Active	Non-active	Active	Active	Non-active	Active
6436022	CC(=CCC1C(O1)(C)[C@H]2[C@@H]([C@@H](CC[C@]23CO3)OC(=O)/C=C/C=C/C=C/C=C/C(=O)O)OC)C	Active	Non-active	Active	Active	Non-active	Active
5354810	CC1/C=C\C=C(\C(=O)NC2=C(C(=C3C(=C(C(=C4C3=C(/C(=C/C(C(C(C(C(C(C(C1O)C)O)C(=O)OC)O)C)O)(C)O)/C)OCO4)C)O)C2=O)OC(=O)C)C)/C	Active	Non-active	Active	Non-active	Active	Active-No
65603	C[C@H]1[C@@]([C@H]([C@@H](O1)O[C@H]2[C@H]([C@@H]([C@@H]([C@@H]([C@H]2O)O)OC(=O)N)O)N=C(N)N)O[C@H]3[C@H]([C@@H]([C@H]([C@@H](O3)CO)O)O)NC)(CO)O	Active	Non-active	Active	Active	Non-active	Active
5151	CCC(C1CCC(C(O1)C(C)C(C(C)C(=O)C(CC)C2C(CC(C3(O2)C=CC(C4(O3)CCC(O4)(C)C5CCC(C(O5)C)(CC)O)O)C)C)O)C)C(=O)O	Active	Non-active	Active	Active	Non-active	Active
164754	CC(C)[C@H]1C(=O)O[C@@H](C(=O)N([C@H](C(=O)O[C@@H](C(=O)N([C@H](C(=O)O[C@@H](C(=O)N1C)C(C)C)C(C)C)C)C(C)C)C(C)C)C)C(C)C	Active	Non-active	Active	Active	Non-active	Active
53384896	C[C@@H]1C/C=C/C=C/[C@@H]([C@@H](C[C@@H]([C@@H](C([C@@H](CC(=O)O1)O)OC)OC2C(C(C(C(O2)C)OC3CC(C(C(O3)C)O)(C)O)N(C)C)O)CC=O)C)OC4CCC(C(O4)C)N(C)C	Active	Non-active	Active	Active	Non-active	Active
16130190	CC(C)([C@H]1C(=O)OC[C@H](C(=O)N2[C@@H]([C@H](CC=N2)O)C(=O)NCC(=O)N(CC(=O)N([C@H](C(=O)OC[C@H](C(=O)N3[C@@H]([C@H](CC=N3)O)C(=O)NCC(=O)N(CC(=O)N1C)C)NC(=O)C4=C(C=C5C=C(C=CC5=N4)OC)O)C(C)(C)O)C)C)NC(=O)C6=C(C=C7C=C(C=CC7=N6)OC)O)O	Active	Non-active	Active	Active	Non-active	Active
6450354	C[C@@H]1C/C=C/C=C/[C@@H]([C@@H](C[C@@H]([C@@H]([C@H]([C@@H](CC(=O)O1)O)OC)O[C@H]2[C@@H]([C@H]([C@@H]([C@H](O2)C)O[C@H]3C[C@@]([C@H]([C@@H](O3)C)O)(C)O)N(C)C)O)CC=O)C)OC4CC[C@@H]([C@H](O4)C)N(C)C	Active	Non-active	Active	Active	Non-active	Active
75941	CCP(=S)(OC)OC1=CC(=C(C=C1Cl)Br)Cl	Active	Non-active	Active	Active	Non-active	Active
9937853	CC[C@@H]1[C@H](/C=C(/C=C/C(=O)[C@@H](C[C@@H]([C@@H]([C@H]([C@@H](CC(=O)O1)O)C)O[C@H]2[C@@H]([C@H](C[C@H](O2)C)N(C)C)O)CC=O)C)\C)C	Active	Non-active	Active	Active	Non-active	Active
244989	CC1=C(C(=O)C2=C(C1=O)N3CC4C(C3(C2COC(=O)N)OC)N4C)N	Active	Non-active	Active	Active	Non-active	Active
54413	C1C(C(C(C(C1N)OC2C(C(C(C(O2)CO)O)N)O)O)OC3C(CC(C(O3)CN)O)N)N	Active	Non-active	Active	Active	Non-active	Active
656842	CC1(C)S[C@@H]2[C@H](NC(=O)C(C(O)=O)C3=CSC=C3)C(=O)N2[C@H]1C(O)=O	Active	Non-active	Active	Active	Active	Active
470375	CC1(C)S[C@@H]2[C@H](NC(=O)[C@H](C(O)=O)C3=CSC=C3)C(=O)N2[C@H]1C(O)=O	Active	Non-active	Active	Active	Non-active	Active
456416	CC[C@@H]1[C@@]([C@@H]([C@H](N(C[C@@H](C[C@@]([C@@H]([C@H]([C@@H]([C@H](C(=O)O1)C)OC2CC(C(C(O2)C)O)(C)OC)C)OC3C(C(CC(O3)C)N(C)C)O)(C)O)C)C)C)O)(C)O	Active	Non-active	Active	Active	Non-active	Active-No
443939	C[C@H]1[C@H]([C@H](C[C@@H](O1)O[C@H]2C[C@@](CC3=C(C4=C(C(=C23)O)C(=O)C5=C(C4=O)C=CC=C5OC)O)(C(=O)CO)O)N)O	Active	Non-active	Active	Active	Non-active	Active
441199	CO[C@@]1([C@@H]2N(C1=O)C(=C(CS2)COC(=O)N)C(=O)O)NC(=O)CC3=CC=CS3	Active	Non-active	Active	Active	Non-active	Active
261131	C1=C(C(=O)NC1=O)C2C(C(C(O2)CO)O)O	Active	Non-active	Active	Non-active	Non-active	Active-No
169372	CC1=C(N2[C@@H]([C@@H](C2=O)NC(=O)C(C3=CCC=CC3)N)SC1)C(=O)O	Active	Non-active	Active	Active	Non-active	Active
102198	C1=NC2=C(C(=N1)N)N=CN2C3[C@H]([C@@H]([C@H](O3)CO)O)O	Active	Non-active	Active	Active	Non-active	Active
72393	C1[C@@H]([C@H]([C@@H]([C@H]([C@@H]1NC(=O)[C@@H](CCN)O)O)O[C@@H]2[C@@H]([C@@H]([C@H](O2)CO)O)O)O[C@@H]3[C@@H]([C@H]([C@@H]([C@H](O3)CN)O)O)N)N	Active	Non-active	Active	Active	Active	Active
54723289	CC[C@H](C)[C@@H]1C(=C(C(=O)N1)C(=O)C)O	Active	Non-active	Active	Active	Active	Active
54695425	CC1=C(C=CC2=C1OC(=O)C(=C2O)NC(=O)C3=CC(=C(C=C3)O)CC=C(C)C)OC4C(C(C(C(O4)(C)C)OC)OC(=O)N)O	Active	Non-active	Active	Active	Active	Active
54685047	CN(C)[C@H]1[C@@H]2[C@H]([C@@H]3C(=C)C4=C(C(=CC=C4)O)C(=C3C(=O)[C@@]2(C(=C(C1=O)C(=O)N)O)O)O)O	Active	Non-active	Active	Non-active	Non-active	Active
53385491	C[C@@H]1[C@H]([C@@H]([C@H]([C@@H](O1)O[C@@H]2[C@H](O[C@H]([C@@H]([C@H]2O)NC(=O)C)O[C@@H]3[C@H]([C@](C(O[C@@H]3OP(=O)(O)OC[C@@H](C(=O)O)OC/C=C(\C)/CC/C=C/C(C)(C)CCC(=C)C/C=C(\C)/CCC=C(C)C)C(=O)O)(C)O)OC(=O)N)CO[C@H]4[C@@H]([C@H]([C@@H]([C@H](O4)CO)O)O)O)NC(=O)C)O)O[C@H]5[C@@H]([C@H]([C@H]([C@H](O5)C(=O)NC6=C(CCC6=O)O)O)O)O	Active	Non-active	Active	Active	Non-active	Active
49867933	CC[C@@H]1[C@@]([C@@H]([C@H](C(=O)[C@@H](C[C@@]([C@@H]([C@H]([C@@H]([C@H](C(=O)O1)C)O[C@H]2C[C@@]([C@H]([C@@H](O2)C)O)(C)OC)C)O[C@H]3[C@@H]([C@H](CC(O3)C)N(C)C)O)(C)O)C)C)O)(C)O	Active	Non-active	Active	Active	Non-active	Active
45105102	C1C(C(C(C(C1N)OC2C(C(C(C(O2)CO)O)O)N)O[C@H]3C([C@H]([C@H](O3)CO)OC4C(C(C(C(O4)CN)O)O)N)O)O)N	Active	Non-active	Active	Active	Non-active	Active
44450615	CCC(C)CCCC(=O)N[C@@H](CCN)C(=O)N[C@@H]([C@@H](C)O)C(=O)N[C@@H](CCN)C(=O)N[C@H]1CCNC(=O)[C@@H](NC(=O)[C@@H](NC(=O)[C@@H](NC(=O)[C@@H](NC(=O)[C@H](NC(=O)[C@@H](NC1=O)CCN)CC(C)C)CC(C)C)CCN)CCN)[C@H](C)O	Active	Non-active	Active	Active	Non-active	Active
44134677	CNC1C(OC2C(OC3C(O)C(O)C(N=C(N)N)C(O)C3N=C(N)N)OC(C)C2(O)CO)OC(CO)C(O)C1O	Active	Non-active	Active	Non-active	Non-active	Active-No
44144393	CCC(C)CCCC(=O)N[C@@H](CCN)C(=O)N[C@@H]([C@@H](C)O)C(=O)N[C@@H](CCN)C(=O)N[C@H]1CCNC(=O)C(NC(=O)[C@H](NC(=O)[C@@H](NC(=O)[C@H](NC(=O)[C@H](NC(=O)[C@@H](NC1=O)CCN)CC(C)C)CC(C)C)CCN)CCN)[C@@H](C)O	Active	Non-active	Active	Active	Non-active	Active
25244760	[H]P(O)(=O)[C@H]1O[C@H]1C	Active	Non-active	Active	Active	Non-active	Active
23724556	CC1C(=O)N(C2CSC(C(C(=O)N(C(C(=O)OC[C@H](C(=O)N1)NC(=O)C3=NC4=CC=CC=C4N=C3)C(C)C)C)N(C(=O)C(NC(=O)[C@@H](COC(=O)C(N(C2=O)C)C(C)C)NC(=O)C5=NC6=CC=CC=C6N=C5)C)C)SC)C	Active	Non-active	Active	Active	Non-active	Active
23679441	CO\N=C(/C(=O)N[C@H]1[C@H]2SCC(CSC3=NC(=O)C(=O)NN3C)=C(N2C1=O)C(O)=O)C1=CSC(N)=N1	Active	Non-active	Active	Active	Non-active	Active
23675321	CC(=O)OCC1=C(N2[C@H](SC1)[C@H](NC(=O)CC1=CC=CS1)C2=O)C(O)=O	Active	Non-active	Active	Active	Non-active	Active
23666879	CCN1CCN(C(=O)N[C@@H](C(=O)N[C@H]2[C@H]3SC(C)(C)[C@@H](N3C2=O)C(O)=O)C2=CC=CC=C2)C(=O)C1=O	Active	Non-active	Active	Active	Non-active	Active
23663938	CO\N=C(/C(=O)N[C@H]1[C@H]2SCC=C(N2C1=O)C(O)=O)C1=CSC(N)=N1	Active	Non-active	Active	Active	Non-active	Active
16727450	CC(C)C/C=C/C(=O)N[C@@H]1[C@H]([C@H]([C@H](O[C@H]1O[C@@H]2[C@@H]([C@H]([C@@H]([C@H](O2)CO)O)O)NC(=O)C)C[C@H]([C@@H]3[C@H]([C@H]([C@@H](O3)N4C=CC(=O)NC4=O)O)O)O)O)O	Active	Non-active	Active	Active	Non-active	Active
11969951	CCC1[C@@]([C@@H]([C@H](N(CC(C[C@@](C(C(C([C@H](C(=O)O1)C)OC2CC(C(C(O2)C)O)(C)OC)C)OC3C(C(CC(O3)C)N(C)C)O)(C)O)C)C)C)O)(C)O	Active	Non-active	Active	Active	Non-active	Active
16219893	CN(C)C1=NC=NC2=C1N=CN2[C@H]3[C@H]([C@H]([C@H](O3)CO)N)O	Active	Non-active	Active	Active	Non-active	Active
16204749	C[C@H]1[C@@H]([C@@H](C[C@H](O1)O[C@H]2[C@H]3C(=O)N[C@@H](C4=CC(=CC(=C4C5=C(C=CC(=C5)[C@H](C(=O)N3)NC(=O)[C@H]6C7=CC(=C(C(=C7)OC8=CC=C2C=C8)O[C@H]9[C@@H]([C@H]([C@@H]([C@H](O9)COC1[C@@H]([C@@H]([C@H]([C@@H](O1)C)O)O)O)O)O)O[C@H]1[C@@H]([C@@H]([C@H]([C@@H](O1)CO)O)O)O[C@H]1[C@H]([C@@H]([C@@H](CO1)O)O)O)OC1=CC=C(C=C1)[C@H]([C@@H]1C(=O)N[C@@H](C2=CC(=C(C(=C2)O)C)OC2=C(C=CC(=C2)[C@H](C(=O)N1)N)O)C(=O)…	Active	Non-active	Active	Active	Non-active	Active
16043998	CC1/C=C/C=C(\C(=O)NC\2=C(C3=C(C(=C4C(=C3C(=O)/C2=C\NN5CCN(CC5)C)C(=O)C(O4)(O/C=C/C(C(C(C(C(C(C1O)C)O)C)OC(=O)C)C)OC)C)C)O)O)/C	Active	Non-active	Active	Active	Active	Active
9690105	CN1C(=NN=N1)SCC2=C(N3[C@@H]([C@@H](C3=O)NC(=O)/C(=N\OC)/C4=CSC(=N4)N)SC2)C(=O)O	Active	Non-active	Active	Active	Non-active	Active
6992020	C[C@@H]1O[C@@H]1P(O)([O-])=O	Active	Non-active	Active	Active	Active	Active-No
6713972	CN(C(=O)NC1[C@@H]([C@@H](C(O[C@@H]1O)CO)O)O)N=O	Active	Non-active	Active	Active	Non-active	Active
6433557	CC(C)C/C=C/C(=O)N[C@@H]1[C@H]([C@H]([C@H](O[C@H]1O[C@@H]2[C@@H]([C@H]([C@@H]([C@H](O2)CO)O)O)NC(=O)C)CC([C@@H]3[C@H]([C@H]([C@@H](O3)N4C=CC(=O)NC4=O)O)O)O)O)O	Active	Non-active	Active	Active	Active	Active-No
6426892	C[C@H]1C(C([C@@H](O1)OC2[C@H](C(C([C@@H](C2O)O)N=C(N)N)O)N=C(N)N)O[C@H]3C(C([C@H](C(O3)CO)O)O)NC)(C=O)O	Active	Non-active	Active	Active	Non-active	Active
6426643	CC[C@@H]1C([C@@H]([C@H](C(=O)[C@@H](CC([C@@H]([C@H]([C@@H]([C@H](C(=O)O1)C)OC2CC(C(C(O2)C)O)(C)O)C)OC3C(C(CC(O3)C)N(C)C)O)(C)O)C)C)O)(C)O	Active	Non-active	Active	Non-active	Non-active	Active
6420045	CCCCCC[C@@H]1[C@H]([C@@H](OC(=O)C([C@H](OC1=O)C)NC(=O)C2=C(C(=CC=C2)NC=O)O)C)OC(=O)CC(C)C	Active	Non-active	Active	Active	Non-active	Active
6410758	C1C(=C(N2[C@H](S1)[C@@H](C2=O)NC(=O)[C@@H](C3=CC=C(C=C3)O)N)C(=O)O)CSC4=NNN=C4	Active	Non-active	Active	Active	Non-active	Active
5458443	C1C(C(C(C(C1N)OC2C(C(C(C(O2)CO)O)O)N)OC3C(C(C(O3)CO)OC4C(C(C(C(O4)CN)O)O)N)O)O)N	Active	Non-active	Active	Active	Non-active	Active
5323583	CC\1=C(NC(=C(/C1=C/2\C=CC(=C(C2=O)OC)OC)N)C3=NC4=C(C=C3)C(=O)C(=C(C4=O)N)OC)C(=O)O	Active	Non-active	Active	Active	Non-active	Active
5280440	CC[C@@H]1[C@H](/C=C(/C=C/C(=O)[C@@H](C[C@@H]([C@@H]([C@H]([C@@H](CC(=O)O1)O)C)O[C@H]2[C@@H]([C@H]([C@@H]([C@H](O2)C)O[C@H]3C[C@@]([C@H]([C@@H](O3)C)O)(C)O)N(C)C)O)CC=O)C)\C)CO[C@H]4[C@@H]([C@@H]([C@@H]([C@H](O4)C)O)OC)OC	Active	Non-active	Active	Active	Non-active	Active
65054	CC1([C@@H](N2[C@H](S1)[C@@H](C2=O)NC(=O)CC3=CC=CC=C3)C(=O)O)C	Active	Non-active	Active	Active	Non-active	Active
53025	CN1C(=NN=N1)SCC2=C(N3[C@@H]([C@@](C3=O)(NC(=O)C4SC(=C(C(=O)N)C(=O)O)S4)OC)SC2)C(=O)O	Active	Non-active	Active	Active	Non-active	Active
40958	C1C(=C(N2[C@H](S1)[C@@H](C2=O)NC(=O)C(C3=CC=CC=C3)N)C(=O)O)Cl	Active	Non-active	Active	Active	Non-active	Active
38103	CC1=C(N2[C@@H]([C@@H](C2=O)NC(=O)[C@@H](C3=CCC=CC3)N)SC1)C(=O)O	Active	Non-active	Active	Active	Non-active	Active
31406	C[C@H]1[C@@]([C@H]([C@@H](O1)OC2[C@H]([C@@H]([C@H]([C@@H]([C@H]2O)O)N=C(N)N)O)N=C(N)N)O[C@H]3[C@H]([C@@H]([C@H]([C@@H](O3)CO)O)O)NC)(CO)O	Active	Non-active	Active	Active	Non-active	Active
23566	CC1([C@@H](N2[C@H](S1)[C@@H](C2=O)NC(=O)C(C3=CC=CC=C3)N)C(=O)O)C	Active	Non-active	Active	Active	Non-active	Active
19037	CC[C@@H]1[C@@]([C@@H]([C@H](C(=O)[C@@H](C[C@@]([C@@H](C([C@@H]([C@H](C(=O)O1)C)OC2CC(C(C(O2)C)O)(C)OC)C)OC3C(C(CC(O3)C)N(C)C)OC(=O)CC)(C)O)C)C)O)(C)O	Active	Non-active	Active	Active	Non-active	Active
12550	CCCCCCC1C(C(OC(=O)C(C(OC1=O)C)NC(=O)C2=C(C(=CC=C2)NC=O)O)C)OC(=O)CC(C)C	Active	Non-active	Active	Active	Active	Active
5773	C1C(=C(N2[C@H](S1)[C@@H](C2=O)NC(=O)CC3=CC=CS3)C(=O)[O-])C[N+]4=CC=CC=C4	Active	Non-active	Active	Non-active	Active	Active-No
4696	C1C=C2C(=CC(=O)O2)C(O1)O	Active	Non-active	Active	Active	Non-active	Active
3417	CC1C(O1)P(=O)(O)O	Active	Non-active	Active	Active	Non-active	Active
2174	CC1(C(N2C(S1)C(C2=O)NC(=O)C(C3=CC=CC=C3)N)C(=O)O)C	Active	Non-active	Active	Active	Non-active	Active
191	C1=NC2=C(C(=N1)N)N=CN2C3C(C(C(O3)CO)O)O	Active	Non-active	Active	Non-active	Active	Active-No
637568	COC(=O)/C=C/C(=O)OC	Active	Non-active	Non-active	Non-active	Non-active	Active-No
501254	C[C@H](CCCCN1C(=O)C2=C(N=CN2C)N(C1=O)C)O	Active	Non-active	Non-active	Active	Non-active	Active-No
445647	C[C@@H]1C[C@@H]([C@@H]2[C@H](C[C@H]([C@@](O2)(C(=O)C(=O)N3CCCC[C@H]3C(=O)O[C@@H]([C@@H]([C@H](CC(=O)[C@@H](/C=C(/C1)\C)CC=C)O)C)C(=C[C@@H]4CC[C@H]([C@@H](C4)OC)O)C)O)C)OC)OC	Active	Non-active	Non-active	Active	Non-active	Active-No
259808	C(C1C(C(C(O1)N2C3=C(C(=O)N=C(N3)N)N=C2N)O)O)O	Active	Non-active	Non-active	Active	Non-active	Active-No
164676	CC1=COC2=C1C(=O)C(=O)C3=C2C=CC4=C3CCCC4(C)C	Active	Non-active	Non-active	Active	Non-active	Active-No
123844	CC[C@H](C)[C@@H]1[C@H](CC(=O)O[C@H](C(=O)[C@@H](C(=O)N[C@H](C(=O)N2CCC[C@H]2C(=O)N([C@H](C(=O)O[C@@H]([C@@H](C(=O)N1)NC(=O)[C@@H](CC(C)C)NC)C)CC3=CC=C(C=C3)OC)C)CC(C)C)C)C(C)C)O	Active	Non-active	Non-active	Active	Non-active	Active-No
114917	CC1=CC=CC2=C1C=CC3=C2C(=O)C(=O)C4=C3OC=C4C	Active	Non-active	Non-active	Non-active	Active	Active-No
108037	CC(=O)C1=NC=C(N1)[C@H]([C@@H]([C@@H](CO)O)O)O	Active	Non-active	Non-active	Active	Non-active	Active
107964	CCN(CC)C1=C(N=C(C=C1)N(CC)CC)N2CCN(CC2)CC(=O)[C@H]3[C@@H](C[C@@H]4[C@@]3(CC=C5[C@H]4CCC6=CC(=O)C=C[C@@]65C)C)C	Active	Non-active	Non-active	Active	Non-active	Active-No
96849	C([C@@H]1[C@H]([C@H]([C@@H](O1)N2C3=C(C(=O)N=C(N3)N)N=C2N)O)O)O	Active	Non-active	Non-active	Active	Non-active	Active-No
68784	C1=CC2=C(N=C1)OC3=C(C=C(C=C3C2=O)C4=NNN=N4)Cl	Active	Non-active	Non-active	Active	Active	Active-No
54611630	C[C@@H]1C[C@@H]([C@@H]2[C@H](C[C@H]([C@@](O2)(C(=O)C(=O)N3CCCC[C@H]3C(=O)OC([C@@H]([C@H](CC(=O)[C@@H](C=C(C1)C)CC=C)O)C)/C(=C/[C@@H]4CC[C@H]([C@@H](C4)OC)O)/C)O)C)OC)OC	Active	Non-active	Non-active	Active	Non-active	Active-No
49867938	CC[C@H]1C(=O)N(CC(=O)N([C@H](C(=O)N[C@H](C(=O)N([C@H](C(=O)N[C@H](C(=O)N[C@@H](C(=O)N([C@H](C(=O)N([C@H](C(=O)N(C(C(=O)N([C@H](C(=O)N1)[C@@H]([C@H](C)C/C=C/C)O)C)C(C)C)C)CC(C)C)C)CC(C)C)C)C)C)CC(C)C)C)C(C)C)CC(C)C)C)C	Active	Non-active	Non-active	Active	Non-active	Active-No
44386696	CC1CC(C2C(CC([C@](O2)(C(=O)C(=O)N3CCCCC3C(=O)OC(C(C(CC(=O)C(/C=C(/C1)\C)CC=C)O)C)/C(=C/C4CCC(C(C4)OC)O)/C)O)C)OC)OC	Active	Non-active	Non-active	Active	Non-active	Active-No
44202893	C[C@@H]1[C@@H]([C@@H]([C@H]([C@@H](O1)O[C@H]2CC[C@]3(C([C@]2(C)CO)CC[C@@]4(C3C=CC5=C6CC(CC[C@@]6([C@@H](C[C@]54C)O)CO)(C)C)C)C)O)O[C@H]7[C@@H]([C@H]([C@@H]([C@H](O7)CO)O)O)O)O	Active	Non-active	Non-active	Active	Non-active	Active-No
25246316	CC[C@H]1C(=O)N(CC(=O)N([C@H](C(=O)NC(C(=O)N([C@H](C(=O)N[C@H](C(=O)N[C@@H](C(=O)N([C@H](C(=O)N([C@H](C(=O)N([C@H](C(=O)N([C@H](C(=O)N1)[C@@H]([C@H](C)C/C=C/C)O)C)C(C)C)C)CC(C)C)C)CC(C)C)C)C)C)CC(C)C)C)C(C)C)CC(C)C)C)C	Active	Non-active	Non-active	Non-active	Non-active	Active-No
24178294	CC1=CC(=C2C3C1C4C5C(=C(C=C4C)O)C(=O)C6C(=CC(C7=C6C5=C3C8C7=C(C(=C(C8C2=O)O)[123I])O)O)O)O	Active	Non-active	Non-active	Active	Non-active	Active-No
23678403	CN1C=NC(=C1SC1=NC=NC2=C1NC=N2)[N+]([O-])=O	Active	Non-active	Non-active	Active	Active	Active
11969572	CC[C@@H](C)[C@H]1[C@@H](CC(=O)OC(C(=O)C(C(=O)NC(C(=O)N2CCCC2C(=O)N(C(C(=O)OC(C(C(=O)N1)NC(=O)C(CC(C)C)NC)C)CC3=CC=C(C=C3)OC)C)CC(C)C)C)C(C)C)O	Active	Non-active	Non-active	Active	Non-active	Active
12961637	C1=CC=C2C(=C1)C(=O)OC23C4=CC(=C(C(=C4OC5=C(C(=C(C=C35)[N+](=O)[O-])[O-])Br)Br)[O-])[N+](=O)[O-]	Active	Non-active	Non-active	Active	Active	Active-No
9554199	C/C(=N\N=C(N)N)/C1=CC(=CC(=C1)NC(=O)CCCCCCCCC(=O)NC2=CC(=CC(=C2)/C(=N/N=C(N)N)/C)/C(=N/N=C(N)N)/C)/C(=N/N=C(N)N)/C	Active	Non-active	Non-active	Active	Active	Active-No
6711227	CC[C@@H](C)[C@H]1[C@@H](CC(=O)OC(C(=O)C(C(=O)NC(C(=O)N2CCCC2C(=O)N(C(C(=O)OC(C(C(=O)N1)NC(=O)C(CC(C)C)N(C)C(=O)C3CCCN3C(=O)C(C)O)C)CC4=CC=C(C=C4)OC)C)CC(C)C)C)C(C)C)O	Active	Non-active	Non-active	Active	Non-active	Active-No
6475296	CCC[C@H]1C(=O)N(CC(=O)N([C@H](C(=O)N[C@H](C(=O)N([C@H](C(=O)N[C@H](C(=O)N[C@@H](C(=O)N([C@H](C(=O)N([C@H](C(=O)N([C@H](C(=O)N([C@H](C(=O)N1)[C@@H]([C@H](C)C/C=C/C)O)C)C(C)C)C)CC(C)C)C)CC(C)C)C)C)C)CC(C)C)C)C(C)C)CC(C)C)C)C	Active	Non-active	Non-active	Active	Non-active	Active
6438394	CCCCCCC(=O)CCCCCC/C=C/C[C@H]([C@@H]([C@@](CO)(C(=O)O)N)O)O	Active	Non-active	Non-active	Active	Non-active	Active-No
6436101	CCCC1C(=O)N(CC(=O)N(C(C(=O)NC(C(=O)N(C(C(=O)NC(C(=O)NC(C(=O)N(C(C(=O)N(C(C(=O)N(C(C(=O)N(C(C(=O)N1)C(C(C)C/C=C/C)O)C)C(C)C)C)CC(C)C)C)CC(C)C)C)C)C)CC(C)C)C)C(C)C)CC(C)C)C)C	Active	Non-active	Non-active	Active	Non-active	Active
6433718	C1=C2C(=C(C(=C1Br)[O-])Br)OC3=C(C(=C(C=C3C24C5=C(C(=C(C(=C5Cl)Cl)Cl)Cl)C(=O)O4)Br)[O-])Br	Active	Non-active	Non-active	Active	Active	Active-No
5459010	CC1C(C(C(C(O1)OC2C(C(OC(C2OC(=O)/C=C/C3=CC(=C(C=C3)O)O)CO)OCCC4=CC(=C(C=C4)O)O)O)O)O)O	Active	Non-active	Non-active	Active	Non-active	Active
5281800	C[C@H]1[C@@H]([C@H]([C@H]([C@@H](O1)O[C@@H]2[C@H]([C@@H](O[C@@H]([C@H]2OC(=O)/C=C/C3=CC(=C(C=C3)O)O)CO)OCCC4=CC(=C(C=C4)O)O)O)O)O)O	Active	Non-active	Non-active	Active	Non-active	Active
65384	C1=CC(=CC=C1C[C@@H](C(=O)O)N)O	Active	Non-active	Non-active	Non-active	Active	Active-No
57782	CC(CCCCN1C(=O)C2=C(N=CN2C)N(C1=O)C)O	Active	Non-active	Non-active	Non-active	Non-active	Active-No
53181	CC12CCC3C(C1CC[C@@H]2OC(=O)COC(=O)CCCC4=CC=C(C=C4)N(CCCl)CCCl)CCC5=C3C=CC(=C5)OC(=O)C6=CC=CC=C6	Active	Non-active	Non-active	Active	Non-active	Active-No
30751	C1=NC2=C(N1[C@H]3[C@H]([C@@H]([C@H](O3)COP(=O)(O)O)O)O)N=C(N=C2N)F	Active	Non-active	Non-active	Active	Non-active	Active-No
22420	C1CNP(=O)(OC1)N(CCCl)CCCl	Active	Non-active	Non-active	Non-active	Non-active	Active-No
15979	CC(C)CCCC(C)CCCC(C)CCCC(C)C	Active	Non-active	Non-active	Active	Active	Active-No
8019	COCCO	Active	Non-active	Non-active	Non-active	Active	Active-No
6436	C[C@]12C[C@@H]([C@]3([C@H]([C@@H]1C[C@@H]4[C@]2(OC(O4)(C)C)C(=O)CO)CCC5=CC(=O)C=C[C@@]53C)F)O	Active	Non-active	Non-active	Non-active	Non-active	Active-No
5426	C1CC(=O)NC(=O)C1N2C(=O)C3=CC=CC=C3C2=O	Active	Non-active	Non-active	Active	Active	Active-No
4956	CCCCCC(C=CC1C(C(CC1=O)O)CC=CCCCC(=O)O)O	Active	Non-active	Non-active	Active	Non-active	Active-No
3385	C1=C(C(=O)NC(=O)N1)F	Active	Non-active	Non-active	Non-active	Non-active	Active-No
2478	CS(=O)(=O)OCCCCOS(=O)(=O)C	Active	Non-active	Non-active	Non-active	Non-active	Active-No
1206	CC(CC1=CC=CC=C1)NC	Non-active	Non-active	Non-active	Non-active	Non-active	Active-No
1773	C1C(CNC2=C1C(=O)N=C(N2)N)CCC3=CC=C(C=C3)C(=O)NC(CCC(=O)O)C(=O)O	Non-active	Non-active	Non-active	Active	Active	Active-No
2151	CC1=C(C(=O)N(N1C)C2=CC=CC=C2)N	Non-active	Non-active	Non-active	Non-active	Active	Active-No
2520	CC(C)C(CCCN(C)CCC1=CC(=C(C=C1)OC)OC)(C#N)C2=CC(=C(C=C2)OC)OC	Non-active	Non-active	Non-active	Non-active	Active	Active-No
3226	C(C(OC(F)F)(F)F)(F)Cl	Non-active	Non-active	Non-active	Non-active	Non-active	Active-No
3546	C1=CC2=C(C=CN=C2)C(=C1)S(=O)(=O)NCCN=C(N)N	Non-active	Non-active	Non-active	Active	Active	Active-No
3778	CC1=C(C(=O)N(N1C)C2=CC=CC=C2)C(C)C	Non-active	Non-active	Non-active	Non-active	Active	Active-No
4033	CN(CCCl)CCCl	Non-active	Non-active	Non-active	Non-active	Active	Active-No
4116	COC(C(Cl)Cl)(F)F	Non-active	Non-active	Non-active	Non-active	Non-active	Active-No
4417	CCN(CC)CCOC(=O)C(CC1CCCO1)CC2=CC=CC3=CC=CC=C32	Non-active	Non-active	Non-active	Non-active	Active	Active-No
4761	CN(C)CCC(C1=CC=CC=C1)C2=CC=CC=N2	Non-active	Non-active	Non-active	Non-active	Non-active	Active-No
4890	C1CC1CN2C(=O)CN=C(C3=C2C=CC(=C3)Cl)C4=CC=CC=C4	Non-active	Non-active	Non-active	Non-active	Active	Active-No
5198	CC1CCC(CC1)NC(=O)N(CCCl)N=O	Non-active	Non-active	Non-active	Non-active	Non-active	Active-No
5419	C1CC(C2=CC=CC=C2C1)C3=NCCN3	Non-active	Non-active	Non-active	Non-active	Active	Active-No
5641	CCOC(=O)N	Non-active	Non-active	Non-active	Non-active	Active	Active-No
5799	C1CN1C2=NC(=NC(=N2)N3CC3)N4CC4	Non-active	Non-active	Non-active	Non-active	Active	Active-No
6235	C1CN1C2=CC(=O)C(=C(C2=O)N3CC3)N4CC4	Non-active	Non-active	Non-active	Non-active	Non-active	Active-No
7014	C1CCN2C[C@H]3C[C@@H]([C@H]2C1)CN4[C@H]3CCCC4	Non-active	Non-active	Non-active	Non-active	Non-active	Active-No
7497	CCN(CC)CCO	Non-active	Non-active	Non-active	Non-active	Active	Active-No
9047	COC1=NC=CN=C1NS(=O)(=O)C2=CC=C(C=C2)N	Non-active	Non-active	Non-active	Non-active	Non-active	Active-No
9955	C1=C2C(=NC(=N1)N)N=CN2	Non-active	Non-active	Non-active	Non-active	Active	Active-No
11108	C1=CC=C(C=C1)N(CCCl)CCCl	Non-active	Non-active	Non-active	Non-active	Active	Active-No
14051	CC[C@@H](CO)NCCN[C@@H](CC)CO	Non-active	Non-active	Non-active	Non-active	Non-active	Active-No
16923	C[C@H]1C[C@H]2[C@@H]3CC[C@@]([C@]3(C[C@@H]([C@@H]2[C@@]4(C1=CC(=O)C=C4)C)O)C)(C(=O)COC(=O)CCC(=O)O)O	Non-active	Non-active	Non-active	Active	Non-active	Active-No
23480	CC(CC(C1=CC=CC=C1)C2=CC=CC=C2)NC(C)(C)C	Non-active	Non-active	Non-active	Non-active	Active	Active-No
30951	C=CCOC1=C(C=C(C=C1)CC(=O)O)Cl	Non-active	Non-active	Non-active	Non-active	Active	Active-No
47725	CC(C)CC(C(=O)NC(CCCN=C(N)N)C(=O)N1CCCC1C(=O)NNC(=O)N)NC(=O)C(COC(C)(C)C)NC(=O)C(CC2=CC=C(C=C2)O)NC(=O)C(CO)NC(=O)C(CC3=CNC4=CC=CC=C43)NC(=O)C(CC5=CN=CN5)NC(=O)C6CCC(=O)N6	Non-active	Non-active	Non-active	Active	Non-active	Active
62413	CN1CCN(CC1)C(C2=CC=CC=C2)C3=CC=C(C=C3)Cl	Non-active	Non-active	Non-active	Non-active	Active	Active-No
65664	C[C@@H]1CC[C@H]2[C@H]([C@H](O[C@H]3[C@@]24[C@H]1CC[C@](O3)(OO4)C)OC(=O)CCC(=O)O)C	Non-active	Non-active	Non-active	Active	Non-active	Active-No
65884	CC1=C(C(C(=C(N1)C)C(=O)O[C@H]2CCN(C2)CC3=CC=CC=C3)C4=CC(=CC=C4)[N+](=O)[O-])C(=O)OC	Non-active	Non-active	Non-active	Non-active	Non-active	Active-No
68909	CC1=C(C(C(=C(N1)C)C(=O)OC)C2=CC=CC=C2OC(F)F)C(=O)OC	Non-active	Non-active	Non-active	Non-active	Non-active	Active-No
91438	CC(=O)OCC(=O)[C@]1(CC[C@@H]2[C@@]1(CC(=O)[C@H]3[C@H]2CCC4=CC(=O)C=C[C@]34C)C)O	Non-active	Non-active	Non-active	Active	Non-active	Active-No
104972	CC(C)C(CCCNCCC1=CC(=C(C=C1)OC)OC)(C#N)C2=CC(=C(C=C2)OC)OC	Non-active	Non-active	Non-active	Non-active	Active	Active-No
121928	CC1(O[C@@H]2[C@H]([C@H](O[C@@H]2O1)[C@@H](CO)O)OCCCN(C)C)C	Non-active	Non-active	Non-active	Non-active	Non-active	Active-No
241950	CC1(CC(=NO)CC(N1C)(C)C)C	Non-active	Non-active	Non-active	Non-active	Active	Active-No
358641	CC1=CC(=NO1)NS(=O)(=O)C2=CC=C(C=C2)N	Non-active	Non-active	Non-active	Non-active	Active	Active-No
439693	C1[C@@H]([C@H](O[C@H]1N2C=NC3=C2NC=NC[C@H]3O)CO)O	Non-active	Non-active	Non-active	Active	Non-active	Active-No
517282	CN1C2CCC1C(C(C2)OC(=O)C3=CC=CC=C3)C(=O)OC	Non-active	Non-active	Non-active	Non-active	Active	Active-No
2724372	C=C[C@H]1CN2CCC1C[C@@H]2[C@H](C3=CC=NC4=CC=CC=C34)O	Non-active	Non-active	Non-active	Non-active	Non-active	Active-No
3032325	CC/C(=C(/CC)\C1=CC=C(C=C1)OP(=O)(O)O)/C2=CC=C(C=C2)OP(=O)(O)O	Non-active	Non-active	Non-active	Active	Active	Active-No
4034740	CC(C)CSCC1C(C(C(O1)N2C=NC3=C2N=CN=C3N)O)O	Non-active	Non-active	Non-active	Active	Active	Active-No
5281227	CC1=C(C(CCC1=O)(C)C)/C=C/C(=C/C=C/C(=C/C=C/C=C(/C=C/C=C(/C=C/C2=C(C(=O)CCC2(C)C)C)\C)\C)/C)/C	Non-active	Non-active	Non-active	Active	Non-active	Active-No
5353562	CN(C)N/N=C/1\C(=NC=N1)C(=O)N	Non-active	Non-active	Non-active	Non-active	Active	Active-No
5701991	CN1[C@H]2CC(CC1C(C2)O)OC(=O)[C@H](CO)C3=CC=CC=C3	Non-active	Non-active	Non-active	Non-active	Active	Active-No
5702179	C[C@]12CC[C@](C[C@H]1C3=CC(=O)C4[C@]5(CC[C@@H](C(C5CC[C@]4([C@@]3(CC2)C)C)(C)C)OC(=O)CCC(=O)[O-])C)(C)C(=O)[O-]	Non-active	Non-active	Non-active	Non-active	Non-active	Active-No
6420050	CC1(O[C@H]2[C@H]([C@H](OC2O1)C(CO)O)OCCCN(C)C)C	Non-active	Non-active	Non-active	Non-active	Non-active	Active-No
9883259	CCC1=C(NC2=C1C(=O)C(CC2)CN3CCOCC3)C	Non-active	Non-active	Non-active	Non-active	Active	Active-No
11972532	C/C/1=C\CC[C@@]2([C@H](O2)[C@@H]3C(CC1)C(=C)C(=O)O3)C	Non-active	Non-active	Non-active	Non-active	Non-active	Active-No
23581804	CC(C)CC(C(=O)N[C@@H](CCCN=C(N)N)C(=O)N1CCCC1C(=O)NNC(=O)N)NC(=O)C(COC(C)(C)C)NC(=O)C(CC2=CC=C(C=C2)O)NC(=O)C(CO)NC(=O)C(CC3=CNC4=CC=CC=C43)NC(=O)C(CC5=CN=CN5)NC(=O)C6CCC(=O)N6	Non-active	Non-active	Non-active	Active	Non-active	Active
24867465	CC1(O[C@@H]2[C@H](C(O[C@@H]2O1)[C@@H](CO)O)OCCCN(C)C)C	Non-active	Non-active	Non-active	Non-active	Non-active	Non-active
53299304	C1CC1CN2CC[C@]34C5C(=O)CC[C@]3([C@H]2CC6=C4C(=C(C=C6)O)O5)O	Non-active	Non-active	Non-active	Non-active	Non-active	Non-active
97370	OC(=O)[C@H](CC1=CC=CC=C1)NC(=O)C1=CC=CC=C1	Non-active	Non-active	Non-active	Non-active	Non-active	Non-active
201587	NC1=CC(C(O)=O)=C(O)C=C1	Non-active	Non-active	Non-active	Non-active	Active	Non-active
439551	CC12[C@H]3[C@H](C(O)=O)[C@@]45CC(=C)[C@@](O)(C4)CC[C@H]5[C@]3(OC1=O)C=C[C@@H]2O	Non-active	Non-active	Non-active	Non-active	Non-active	Non-active
5280888	CCCCC[C@H](O)\C=C\[C@H]1[C@H](O)C[C@H](O)[C@@H]1CC(=O)CCCCC(O)=O	Non-active	Non-active	Non-active	Active	Active	Non-active
5283137	CCCCC[C@H](O)\C=C\[C@H]1OC(O)C[C@H](O)[C@@H]1C\C=C/CCCC(O)=O	Non-active	Non-active	Non-active	Active	Active	Non-active
5367719	CC\C=C\CC1C(CC(=O)OC)CCC1=O	Non-active	Non-active	Non-active	Non-active	Non-active	Non-active
6099896	NC1=NC(=O)C2=C(NCC(CNC3=CC=C(C=C3)C(=O)NC(CCC(O)=O)C(O)=O)N2C=O)N1	Non-active	Non-active	Non-active	Active	Non-active	Non-active
6710779	CC(=O)O[C@@]1(CCC2C3C=C(Cl)C4=CC(=O)CC[C@]4(C)C3CC[C@]12C)C(C)=O	Non-active	Non-active	Non-active	Non-active	Active	Non-active
205	CC(O)C(N)C(O)=O	Non-active	Non-active	Non-active	Non-active	Non-active	Non-active
854	OCC(O)C(O)C(O)C=O	Non-active	Non-active	Non-active	Non-active	Active	Non-active
3081	CC1(C)OC(=O)NC1=O	Non-active	Non-active	Non-active	Non-active	Non-active	Non-active
6325	C=C	Non-active	Non-active	Non-active	Non-active	Active	Non-active
13044	OC1=C(CBr)C=C(C=C1)[N+]([O-])=O	Non-active	Non-active	Non-active	Non-active	Active	Non-active
21954	O=C1NNC(=O)C=C1	Non-active	Non-active	Non-active	Non-active	Active	Non-active
24405	CC(C)=CCNC1=NC=NC2=C1N=CN2[C@@H]1O[C@H](CO)[C@@H](O)[C@H]1O	Non-active	Non-active	Non-active	Active	Non-active	Non-active
33958	CCN(CC)CCOC1=CC2=C(C=C1)C1=C(C=C(OCCN(CC)CC)C=C1)C2=O	Non-active	Non-active	Non-active	Non-active	Active	Non-active
561063	CCC(C(N)=O)(C(O)=O)C1=CC=CC=C1	Non-active	Non-active	Non-active	Non-active	Active	Non-active

## Sheet: Table S4
Table S4. Data set, natural source, overall activity, antitumor and antibiotic activities, RF predictions for the overall activity, antitumor and antibiotic activities obtained for the test set II.
[A] algae; [An] sea animals e.g. sponges, anemones; [B] bacteria; [D] dinoflagellates; [F] fungus; [L] lichens; [M] molluscs; [Pl] plants; [Y] yeast.
MOL_ID	SMILES	Natural Source	Overall activity	Antitumor activity	Antibiotic activity	Predicted overall activity	Predicted antitumor activity	Predicted antibiotic activity
1	C[C@@H]1CCC[C@@H](O1)C1=C(O)C2=C(C=C1O)C(=O)C1=C(C(O)=CC(O)=C1)C2=O	[F] Aspergillus versicolor	Non-active	Non-active	Non-active	Active	Non-active	Active
2	[H][C@@]12C[C@@]34CCCN3C(=O)[C@]1(C[C@@]1(NC3=C(C=CC=C3)C1=O)C2(C)C)NC4=O	[F] Penicillium brevicompactum, P. viridicatum	Non-active	Non-active	Non-active	Non-active	Active	Non-active
3	[H][C@]12OC=C[C@@]1([H])C1=C(O2)C=C(OC)C2=C1OC(=O)C1=C2CCC1=O	[F] Aspergillus flavus, A. parasiticus, P.puberulum, P.sp.,_x000D_ Asp.sulphureus, P.ostianus	Active	Non-active	Non-active	Active	Non-active	Active
4	[H][C@]1(CCCCCCCC)OC(=O)[C@]2([H])OC(=O)C(=C)[C@]12[H]	[F] Aspergillus avenaceus	Active	Non-active	Active	Non-active	Active	Non-active
5	CCCCC[C@H](O)C1=C(O)C2=C(C=C1O)C(=O)C1=C(C(O)=CC(O)=C1)C2=O	[L] [F] Aspergillus versicolor; Solorina crocea	Active	Non-active	Active	Active	Non-active	Active
6	[H][C@]1(CCCC)OC(=O)[C@@]2([H])C(=C)C(=O)O[C@@]12[H]	[F] Penicillium canadense, Aspergillus tamarii	Active	Non-active	Non-active	Non-active	Non-active	Non-active
7	COC1=CC2=C(C)C=CC=C2C(=C1)C(=O)OC(C(=O)N\C(C(=O)NCC(C)=O)=C1/C(OC(C)=O)C(O)[C@@H]2CN12)C1(C)CO1	[B] Streptomyces griseofuscus s42227	Active	Active	Active	Active	Non-active	Active
8	COC1=CC2=C(C)C=CC=C2C(=C1)C(=O)OC(C(=O)N\C(C(=O)NC(=CO)C(C)=O)=C1/C(OC(C)=O)C(O)[C@@H]2CN12)C1(C)CO1	[B] Streptomyces griseofuscus s42227	Active	Active	Active	Active	Non-active	Active
9	CC(=O)C1=CCCC2CCC1N2	[B] Anabaena flos-aquae, marine	Active	Non-active	Non-active	Non-active	Active	Non-active
10	[H][C@@](N)(CO)[C@]([H])(O)C1=CC=C(C=C1)[N+]([O-])=O	[B] Corynebacterium hydrocarboclastus and Nocardia parafinnica	Active	Non-active	Active	Non-active	Active	Non-active
11	N[C@H]1C[C@H](CO)[C@@H](O)[C@H](O)[C@H]1O	[B] Streptomyces hygroscopicus	Active	Non-active	Non-active	Non-active	Active	Non-active
12	CO[C@H](C\C=C/C=C/CC\C=C\C[C@H](C)\C=C\C(CC(O)=O)=C/C(O)=O)C(\C)=C\C=C(/C)C(O)=O	[B] Pseudomonas cocovenans	Active	Non-active	Non-active	Active	Active	Non-active
13	[H][C@@]1(N)C(=O)N2C(C(O)=O)C(C)=CS[C@]12[H]	[semisynth.]	Non-active	Non-active	Non-active	Active	Non-active	Active
14	[H][C@](N)(C#C)C(O)=O	[B] Streptomyces catenulae ws-4707 (FERM-p 4365)	Active	Non-active	Active	Non-active	Non-active	Active
15	[H][C@@](N)(C(O)=O)[C@]([H])(O)C#C	[F] [B] Sclerotium rolfsii and Streptomyces cattleya	Active	Non-active	Active	Non-active	Non-active	Non-active
16	N[C@@H]([C@H](O)C(O)=O)C(O)=O	[B] Streptomyces sp. 7540-mc, Arthrinium phaeospermum (Astragalus_x000D_ sinicus)	Active	Non-active	Active	Non-active	Non-active	Non-active
17	C[C@@H](O)C[C@H](N)C(O)=O	[F] [B] Streptomyces griseosporus; basidiomycete Boletus satanas;_x000D_ Lathyrus odoratus	Non-active	Non-active	Non-active	Non-active	Non-active	Non-active
18	[H][C@](C)(C[C@]([H])(N)C(O)=O)C=C	[F] [B] Streptomyces sp. UC-5159, Boletus ixocamus-nudi	Active	Non-active	Active	Non-active	Non-active	Non-active
19	NOC[C@H]1NC(=O)[C@@H](CON)NC1=O	[B] Streptomyces nagasakiensis	Active	Active	Non-active	Non-active	Non-active	Non-active
20	N[C@@H]1[C@@H](O)C=CC=C1C(O)=O	[B] Streptomyces zaomyceticus sf-1836 (FERM-p 3254), S.aureofaciens	Non-active	Non-active	Non-active	Non-active	Non-active	Active
21	[H][C@]12SCC(C)=C(N1C(=O)[C@H]2N)C(O)=O	[semisynth.]	Non-active	Non-active	Non-active	Active	Non-active	Active
22	C\C=C(\C)C(=O)O[C@H](C\C(C)=C\C=C\C(C)=C\CO)[C@H]1OC1(C)C	[Pl] Stomanthes africanus	Non-active	Non-active	Non-active	Non-active	Active	Non-active
23	OC\C=C\CO	[F] Penicillium aculeatum	Non-active	Non-active	Non-active	Active	Active	Non-active
24	CCC1=C(O)C=C2[C@H](O)CCC(=O)C2=C1O	[F] Aspergillus parvulus	Non-active	Non-active	Non-active	Non-active	Active	Non-active
25	[H][C@@]1(C)OC(=O)\C(C1=O)=C1/CCCO1	[F] Penicillium charlesii P. fellutanum	Non-active	Non-active	Non-active	Non-active	Non-active	Active
26	[H][C@](N)(C(O)=O)\C=C\CP(O)(O)=O	[B] Streptomyces plumbeus	Non-active	Non-active	Non-active	Non-active	Non-active	Non-active
27	N[C@@H](COC(N)=O)C(O)=O	[B] Streptomyces polychromogenes, S.fradiae, Pseudomonas sp.	Active	Non-active	Active	Non-active	Active	Non-active
28	[H][C@](CO)(NC(=O)C(Cl)Cl)[C@]([H])(O)C1=CC=C(N)C=C1	[B] Streptomyces venezuelae	Non-active	Non-active	Non-active	Non-active	Active	Non-active
29	[H][C@@](N)(C(O)=O)C(\Cl)=C\C(O)=O	[B] Streptomyces viridogenes ma 5450	Active	Non-active	Active	Non-active	Non-active	Non-active
30	[H][C@](N)(CN(C)C)C(O)=O	[B] Streptomyces neocaliberis var. nescaliberis	Active	Non-active	Active	Non-active	Non-active	Non-active
31	N[C@@H](CC#C)C(O)=O	[F] [B] Streptomyces cattleya, Amanita pseudoporphria	Active	Non-active	Active	Active	Active	Non-active
32	[H][C@](N)(CC1=CCC=CC1)C(O)=O	[B] Streptomyces parvulus Tue 64, S. arenae Tue 109,_x000D_ S.diastatochromogenes, S.arenae, S.sp., S.lemensis, S.luteogriseus	Active	Non-active	Active	Non-active	Non-active	Non-active
33	[H][C@@](N)(C(O)=O)C1(C)CC1	[B] Micromonospora miyakanensis pa-4046 (FERM-p 4934)	Active	Non-active	Active	Non-active	Non-active	Non-active
34	N[C@@H](CC1=CC=C(O)C=N1)C(O)=O	[B] Streptomyces chibaensis sf-1346 (FERM-p 1523)	Active	Active	Active	Non-active	Active	Non-active
35	[H][C@](N)(CCC(=O)NNC1=CC=CC=C1C(O)=O)C(O)=O	[F] Penicillium oxalicum	Non-active	Non-active	Non-active	Non-active	Active	Non-active
36	OC(=O)C[C@@H]1OC(=O)\C(C1=O)=C1/CCCO1	[F] Penicillium charlesii	Non-active	Non-active	Non-active	Non-active	Non-active	Active
37	CCCC(=O)C1=C(O)[C@H](CC(O)=O)OC1=O	[F] Penicillium charlesii	Non-active	Non-active	Non-active	Non-active	Non-active	Active
38	OC\C=C/CO	[F] Penicillium aculeatum	Non-active	Non-active	Non-active	Active	Active	Non-active
39	OC1=CC=C(\C=C\C(=O)C2=CC=C(O)C=C2O)C(O)=C1	[An] Tubastraea micrantha	Non-active	Non-active	Non-active	Active	Active	Non-active
40	CN1CC(O)C(O)C(O)C1CO	[B] Streptomyces	Active	Non-active	Active	Non-active	Active	Non-active
41	NC1(CCCC1[N+]([O-])=O)C(O)=O	[F] Aspergillus wentii	Active	Non-active	Non-active	Non-active	Non-active	Non-active
42	OCC1NCC(O)C(O)C1O	[B] S.lavendulae, S.lavendulae-trehalostaticus, Morus sp. Jacobinina_x000D_ suberecta; Morus spp.; Streptomyces sp.; Bacillus spp.	Active	Non-active	Active	Non-active	Active	Non-active
43	NC(CO)C1OC2(OC3C(O)C(CO)OC(OC4C(O)C(N)C(O)C(NC(N)=N)C4O)C3O2)C(O)C(O)C1O	[F] Saccharopolyspora hirsuta	Active	Non-active	Active	Active	Non-active	Active
44	CC[C@@]1(O)C[C@H](OC2CC(N)C(O)C(C)O2)C2=C(O)C3=C(C(=O)C4=C(C(O)=CC=C4)C3=O)C(O)=C2[C@H]1C(O)=O	[B] daunorubicin-producing Streptomyces, A. rosioviolacea,_x000D_ [B] Streptomyces coeruleorubidus	Active	Active	Non-active	Active	Non-active	Active
45	CC(CCN(C)C(N)=N)C(N)C(=O)NC1C=CC(OC1C(O)=O)N1C=CC(N)=NC1=O	[B] Streptomyces arginensis	Active	Non-active	Active	Active	Active	Non-active
46	CN[C@@H](C(C)C)C(=O)N[C@@H](CC1=CC=C(O)C=C1)C(=O)N[C@@H](CC1=CC=C(O)C=C1)P(O)(O)=O	[B] Actinomadura sp. 937ze-1	Active	Non-active	Non-active	Active	Active	Non-active
47	[H][C@]12C[C@H](SCCNC(C)=O)[C@@H](N1C(=O)[C@H]2C(C)O)C(O)=O	[B] Streptomyces fulvoviridis, S.argenteolus, S.olivaceus,_x000D_ S.flavogriseus; marine	Non-active	Non-active	Non-active	Active	Non-active	Active
48	NC1C(O)C(CO)OC1N1C=NC2=C1N=C(N)NC2=O	[B] Aerobacter sp., Aerobacter cloaceae	Active	Active	Active	Active	Non-active	Active
49	C\C=C\CC1=C(CCCCCC(O)=O)C=CC=C1	[B] marine Alteromonas rubra	Non-active	Non-active	Non-active	Non-active	Active	Non-active
50	CC(=O)NC(CC([O-])=O)C[N+](C)(C)C	[F] Aspergillus sp. 3704 (FERM-bp-185, FERM-p 6224, IFO 31171),_x000D_ Emericella cleistominuta (ifo 30839), E. nidulans (ifo 5719, etc.),_x000D_ E. nidulans var. acristata (ifo 30844, etc.), E. nidulans var.lata_x000D_ (ifo 30847), E. nidulans var. nidulans (ifo 30872), E. quadrilineata_x000D_ (ifo 5859, etc.), E. rugulosa (ifo 8626, etc.), E. sublata (ifo 30906)	Non-active	Non-active	Non-active	Non-active	Active	Non-active
51	CC\C(=C/C1OC1C)C(=O)C(\C=C\C=C\C1=CC=CC(O)=C1C(O)=O)C(C)OC	[B] Streptomyces sp. 2-11	Non-active	Non-active	Non-active	Active	Active	Non-active
52	[H][C@@](C)(OC)[C@]([H])(\C=C\C=C\C1=CC=CC(O)=C1C(O)=O)C(=O)C(\C)=C\C1OC1C	[B] Streptomyces sp. 2-11	Active	Non-active	Non-active	Active	Active	Non-active
53	[H][C@](C)(O)C[C@]([H])(NC(C)=O)C(O)=O	[F] Boletus satanas	Non-active	Non-active	Non-active	Non-active	Non-active	Non-active
54	NC1=NC2=C(N=CN2C2CC(O)C(CO)O2)C(N)=N1	[B] Actinomadura sp.	Active	Active	Non-active	Active	Non-active	Non-active
55	N[C@@H]([C@H](O)CO)C(O)=O	[B] Streptomyces sp.	Active	Non-active	Active	Non-active	Non-active	Non-active
56	[H][C@@](N)(C(O)=O)[C@@]([H])(O)C(=O)OC	[Pl] Astragalus sinicus	Non-active	Non-active	Non-active	Non-active	Non-active	Non-active
57	[H][C@](N)(CC(Cl)Cl)C(O)=O	[B] Streptomyces armentosus	Active	Non-active	Active	Non-active	Non-active	Non-active
58	[H][C@@](N)(CCC(=O)C=[N+]=[N-])C(O)=O	[B] Streptomyces ambofaciens, S.sp., S.phaeochromogenes	Active	Active	Active	Active	Active	Non-active
59	NC1=CC=CC=C1O	[B] Streptomyces sp.	Active	Non-active	Non-active	Active	Active	Non-active
60	CN1C(=O)[C@@]2(CC3=CC=CC=C3)SSS[C@]1(CO)C(=O)N2C	[semisynth.]	Active	Non-active	Active	Non-active	Active	Non-active
61	OC(=O)C[C@@](O)(CC1=CC=CC=C1)C(O)=O	[B] marine Chromobacterium violaceum; Streptomyces hygroscopicus mg_x000D_ 368-cf 16	Active	Non-active	Non-active	Non-active	Non-active	Non-active
62	CCCCCC1=CC(O)=C(CCCC)C(O)=C1	[F] Stemphylium majusculum and Pleospora herbarum	Active	Non-active	Active	Non-active	Active	Non-active
63	[H][C@@](C)(O)[C@]1([H])N(C)C(=O)CNC(=O)[C@@H](CCC(N)=O)NC(=O)\C(NC(=O)[C@@H](CC2=CC=C(O)C=C2)NC(=O)C(NC(=O)C(NC(=O)C(\NC(=O)C[C@H](O)CCCCCCCCCCC)=C/C)[C@@H](C)OC(=O)[C@H](CC2=CN=CN2)NC1=O)[C@@H](C)O)=C/C	[B] Aeromonas sp.	Active	Non-active	Active	Active	Non-active	Active
64	[H][C@@](C)(OC1OC(CO)C(O)C(O)C1O)[C@]1([H])N(C)C(=O)CNC(=O)[C@@H](CCC(N)=O)NC(=O)\C(NC(=O)[C@@H](CC2=CC=C(O)C=C2)NC(=O)C(NC(=O)C(NC(=O)C(\NC(=O)CC(O)CCCCCCCCCCC)=C/C)[C@@H](C)OC(=O)[C@H](CC2=CN=CN2)NC1=O)[C@@H](C)O)=C/C	[B] Aeromonas sp.	Active	Non-active	Active	Active	Non-active	Active
65	NC(=O)C1=C(N)C(=O)[C@@H]2O[C@@H]2C1=O	[B] Streptomyces no. 2061 fce, S. sp. (nclb 11306)	Active	Non-active	Active	Active	Non-active	Active
66	OC(=O)\C=C\C12CC3(OC3C1O2)C#N	[F] Penicillium rugasum	Active	Non-active	Active	Non-active	Non-active	Active
67	COC1C(OC(=O)C2=CC=CN2)C(O)C(OC2=CC=C3C(O)=C(NC(=O)C4=CC=C(O)C(C\C=C(/C)C)=C4)C(=O)OC3=C2Cl)OC1(C)C	[B] Streptomyces griseovariabilis 2562	Active	Non-active	Active	Active	Non-active	Active
68	[H][C@](O)(CCN)C(=O)NC1CC(N)C(OC2OC(CCC2N)CNC)C(OC2OC(CO)C(O)C2O)C1O	[B] Bacillus circulans	Active	Non-active	Active	Active	Non-active	Active
69	CNCC1CCC(N)[C@H](O1)O[C@@H]1C(N)C[C@@H](NC(=O)[C@@H](O)CCN)C(O)C1O[C@@H]1O[C@H](CO)C(O)C1O	[B] Bacillus circulans + 3',4'-dideoxy-6'-N-methylneamine_x000D_ B.circulans + g-N-methyl-gentamine c1a	Active	Non-active	Active	Active	Non-active	Active
70	NCC[C@H](O)C(=O)N[C@@H]1CC(N)[C@@H](O[C@H]2OC(CN)CCC2N)C(O[C@@H]2O[C@H](CO)C(O)C2O)C1O	[B] Bacillus circulans+3.4-dideoxyneamine	Active	Non-active	Active	Active	Non-active	Active
71	NCC[C@H](O)C(=O)N[C@@H]1CC(N)[C@@H](O[C@H]2OC(CN)CCC2N)C(O[C@@H]2O[C@H](CO)C(O)C2O)C1O	[B] Bacillus circulans+3.4-dideoxyneamine	Active	Non-active	Active	Active	Non-active	Active
72	NC1C(CO)OC(C1O)N1C=NC2=C1N=CN=C2N	[F] Helminthosporium sp., Cordyceps militaris, Aspergillus nidulans	Active	Non-active	Active	Active	Non-active	Active
73	NCC[C@H](O)C(=O)N[C@@H]1CC(N)[C@@H](O[C@H]2OC(CN)[C@@H](O)C(Cl)C2N)C(O[C@@H]2O[C@H](CO)C(O)C2O)C1O	[B] Bacillus vitelinus + 3'-Chloroneamine,B. circulans	Active	Non-active	Active	Active	Non-active	Active
74	CN(C)C1C(CO)OC(C1O)N1C=NC2=C1N=CN=C2N(C)C	[F] Helminthosporium spp.	Active	Active	Non-active	Non-active	Non-active	Non-active
75	CNC1C(CO)OC(C1O)N1C=NC2=C1N=CN=C2N(C)C	[semisynth.]	Active	Active	Non-active	Active	Non-active	Non-active
76	CNC1C(CO)OC(C1O)N1C=NC2=C1N=CN=C2N	[semisynth.]	Active	Active	Non-active	Active	Non-active	Non-active
77	CN(C1C(COC(C)=O)OC(C1OC(C)=O)N1C=NC2=C1N=CN=C2N)C(C)=O	[semisynth.]	Active	Active	Non-active	Active	Non-active	Active
78	[O-][N+](=O)C1=C(C=CC=C1Br)C1=CNC=C1	[B] Pseudomonas aureofaciens acn	Active	Non-active	Non-active	Non-active	Active	Non-active
79	CC(=O)NC1C(OC2OC(C)(C)OC12)C(O)CO	[B] Bacillus aminoglucosidicus and Streptomyces lansus	Non-active	Non-active	Non-active	Non-active	Non-active	Non-active
80	CC(=O)NC1C(O)C(O)OC(CO)C1O	[B] Bacillus aminoglucosidicus and Streptomyces lansus	Non-active	Non-active	Non-active	Non-active	Non-active	Non-active
81	CC(=O)NC1C(OC2OC(C)(C)OC12)C1COC(C)(C)O1	[B] Bacillus aminoglucosidicus and Streptomyces lansus	Non-active	Non-active	Non-active	Non-active	Non-active	Non-active
82	CC(=O)N[C@H]1CCOC1=O	[semisynth.]	Non-active	Non-active	Non-active	Non-active	Non-active	Non-active
83	N[C@H]1CO[C@H]1C(O)=O	[B] Streptomyces sp. om-2317 (FERM-p 7529)	Active	Active	Non-active	Non-active	Non-active	Active
84	NC1C(O)C(O)OC(CO)C1O	[B] Streptomyces lansus uc 8204, Bacillus aminoglucosidicus	Active	Non-active	Active	Non-active	Active	Non-active
85	C[C@@H]1OC(=O)[C@@H]1N	[B] Bacillus sp.	Active	Non-active	Active	Non-active	Non-active	Active
86	N[C@H]1CCOC1=O	[semisynth.]	Non-active	Non-active	Non-active	Non-active	Non-active	Non-active
87	O=C1OC(=O)C(C2=CC=CC=C2)=C1CC1=CC=CC=C1	[F] Aspergillus nidulans (ifo 6398)	Non-active	Non-active	Non-active	Non-active	Active	Non-active
88	[O-][N+](=O)C1=C(C=CC=C1Br)C1=CNC=C1Br	Ps.pyrrolnitrica + NH4Br, Ps.acidula+NH4Br, Ps.sp.+NH4Br_x000D_ [B] Pseudomonas pyrrolnitrica and several other pyrrolnitrin-_x000D_ producing strains	Active	Non-active	Active	Non-active	Active	Non-active
89	OC(=O)C1=CC(Br)=C(O)C2=C1C(=O)C1=C(C=CC=C1)C2=O	[A] Tubeastraea micrantha	Non-active	Non-active	Non-active	Active	Non-active	Non-active
90	CCCCC1=C[C@H](C)OC1=O	[B] Streptomyces griseus; Streptomyces avermitilis	Non-active	Non-active	Non-active	Non-active	Active	Non-active
91	[H][C@@](N)(C(O)=O)[C@@]([H])(O)C(N)=O	[Pl] Astragalus sinicus; threo:_x000D_ [B] Dactylosporangium aurantiacum	Non-active	Non-active	Non-active	Non-active	Non-active	Non-active
92	COC1OC2COC(C)OC2C(NC(C)=O)C1O	[B] Bacillus aminoglucosidicus and Streptomyces lansus	Non-active	Non-active	Non-active	Non-active	Non-active	Non-active
93	CC\C=C\C1=C(CCC(O)=O)C(=O)OC1=O	[F] Paecilomyces varotii	Non-active	Non-active	Non-active	Non-active	Non-active	Non-active
94	[H][C@]1(CONC1=O)NC(C)=O	[B] Streptomyces garyphalus, S. orchidaceus, S. lavendulae, S._x000D_ nagasakiensis	Active	Non-active	Active	Non-active	Non-active	Non-active
95	COC1=NC(N)=C(CO)C=N1	[B] Streptomyces albus, Bacillus megatherium	Active	Non-active	Active	Non-active	Active	Non-active
96	[H][C@@]12CC3=CC4=C(C(O)=CC=C4Cl)C(O)=C3C(=O)[C@]1(O)C(=O)C(C(N)=O)=C(O)[C@H]2N	[B] Streptomyces aureofaciens mutant	Non-active	Non-active	Non-active	Active	Non-active	Active
97	CC[C@@]1(O)CCC2=C(O)C3=C(C=C2[C@H]1C(=O)OC)C(=O)C1=C(C(O)=CC(O)=C1)C3=O	[B] Streptomyces galileus	Non-active	Non-active	Non-active	Active	Non-active	Active
98	CC(O)CC(OC(C)CO)OC1C(N)CC(OC1C)O[C@H]1C[C@@](O)(CC2=C1C(O)=C1C(=O)C3=C(C=CC=C3O)C(=O)C1=C2O)C(C)O	[B] Actinomadura sp. d326, Actinomadura roseoviolacea-biwakoensis	Active	Active	Active	Active	Non-active	Active
100	NCC1OC(OC2CC(O)C(N)CC2N)C(O)C(O)C1O	[B] Streptomyces kanamyceticus	Active	Non-active	Active	Active	Non-active	Active
101	CC[C@@]1(O)C[C@H](OC2CC(N)C(O)C(C)O2)C2=C(O)C3=C(C=C2C1)C(=O)C1=C(C(O)=CC=C1)C3=O	[B] Streptomyces peucetius var. aureus 416 f.i. (ATCC 31428, Dsm_x000D_ 1367, FERM-p 4622), S.peuceticus-caesius	Active	Non-active	Active	Active	Non-active	Active
102	CC1OC(CC(N)C1O)O[C@H]1C[C@@](O)(CC2=CC3=C(C(=O)C4=C(C=CC=C4O)C3=O)C(O)=C12)C(=O)CO	[B] Streptomyces peucetius var. aureus 416 f.i. (ATCC 31428, Dsm_x000D_ 1367, FERM-p 4622), S.peuceticus-caesius	Active	Active	Active	Active	Non-active	Active
103	CNC1C(O)COC(OC2C(N)CC(N)C(OC3OC(COC4OC(CO)C(O)C(O)C4O)C(O)C(O)C3N)C2O)C1O	[B] Actinoplanes sp. (NRRL 3884, FERM-p 1670) Micromonospora_x000D_ sagamiensis g-477 (FERM-p 4459)	Active	Non-active	Active	Active	Non-active	Active
104	COC1=C(C)C(=O)C2=C(C(NO)C3C(C#N)C4OC5C=C(CCN)C2C3C5N4C)C1=O	[B] Streptomyces flavogriseus 49 (ATCC 31386, FERM-p 4400)	Active	Non-active	Active	Active	Non-active	Active
105	[H][C@](O)(CCN)C(=O)NC1CC(N)C(OC2OC(CN)CCC2N)C(OC2OC(CN)C(O)C2O)C1O	[semisynth.]	Non-active	Non-active	Non-active	Active	Non-active	Active
106	[H][C@](O)(CCN)C(=O)NC1CC(N)C(OC2OC(CN)CC(O)C2N)C(OC2OC(CN)C(O)C2O)C1O	[Semisynth.]	Non-active	Non-active	Non-active	Active	Non-active	Active
107	NC1CC(=CC=C1)C(O)=O	[B] Streptomyces toyocaensis	Active	Active	Non-active	Non-active	Non-active	Non-active
108	NC(CC#CC(O)=O)C(O)=O	[B] Streptomyces sp.	Active	Non-active	Active	Non-active	Active	Non-active
109	NC1C=C(O)C(=O)C2OC12	[B] Streptomyces sp.	Active	Non-active	Active	Active	Non-active	Active
110	OCC1NC(O)C(O)C(O)C1O	[B] Streptomyces lydicus	Active	Active	Non-active	Non-active	Active	Active
111	OCC1NC(O)C(O)C(O)C1O	[B] Streptomyces nojiriensis, S.lavendulae, S.ficellus	Active	Non-active	Active	Non-active	Active	Active
112	OCC1NC(=O)C(O)C(O)C1O	[B] Streptomyces lavendulae	Non-active	Non-active	Non-active	Non-active	Active	Non-active
113	OCC1NC(O)C(O)C(O)C1O	[B] Streptomyces lavandulae	Active	Active	Non-active	Non-active	Active	Active
114	NC1=NC(=O)N(C=N1)C1OC(CO)C(O)C1O	[B] Streptoverticillium sp., Streptomyces ladakanus-ladakanus_x000D_ Actinoplanes awajinensis, Actinoplanes missouriensis	Active	Active	Active	Active	Active	Non-active
115	CCCCC1=CC=C(N=C1)C(O)=O	[F] Gibberella fujikuroi, Fusarium oxysporum, Fus.sp., Fus.solani	Active	Non-active	Active	Non-active	Active	Non-active
116	N[C@@H]1[C@H](O)[C@@H](O)[C@H](O)[C@@H](CO)[C@H]1O	[B] Streptomyces hygroscopicus sub. limoneus	Active	Active	Non-active	Active	Active	Non-active
117	[H][C@@]1(CC[C@H](Cl)CN1)[C@]1([H])NC(=O)[C@@]([H])(NC1=O)[C@]1([H])CC[C@@H](Cl)CN1	[B] Streptomyces griseoluteus	Active	Active	Active	Non-active	Active	Non-active
118	CNC1C(O)C(OCC1(C)O)OC1C(N)CC(N)C(OC2OC(CCC2N)CN(C)C)C1O	[B] Micromonospora sagamiensis var. nonreducans ky11504 (FERM-p_x000D_ 3962, NRRL 11101)	Active	Non-active	Active	Active	Non-active	Active
119	[H][C@]12SC(C)(C)[C@@H](N1C(=O)[C@H]2NC(=O)CC1=CC=C(N)C=C1)C(O)=O	[semisynth.]	Active	Non-active	Active	Active	Non-active	Active
120	[H][C@]12SC(C)(C)[C@@H](N1C(=O)[C@H]2N)C(=O)OC	[semisynth.]	Non-active	Non-active	Non-active	Non-active	Non-active	Non-active
121	[H][C@@]12[C@H](N)C(=O)N1[C@@H](C(O)=O)C(C)(C)S2=O	[semisynth.]	Non-active	Non-active	Non-active	Active	Non-active	Active
122	[H][C@]12SC(C)(C)[C@@H](N1C(=O)[C@H]2N)C(O)=O	[F] Penicillium chrysogenum, Malbranchella sp., Polypaecilium sp._x000D_ Trichoderma viridae, Trichoderma lignorum, Gymnoascus sp.	Active	Non-active	Active	Non-active	Non-active	Active
123	[H][C@]1(C[C@@H](OC)[C@@H](C)[C@]2(O1)O[C@@](C)(C[C@H]2C)[C@]1([H])O[C@@]([H])(C[C@H]1O[C@@H]1CC[C@H](OC)[C@@H](C)O1)[C@@]1([H])CC[C@@]([H])(O1)[C@@]1([H])O[C@](C)(O)[C@H](C)C[C@@H]1C)C[C@]1([H])O[C@@](O)([C@@H](C)[C@H](OC)[C@@H]1C)[C@@H](O)C(O)=O	[B] Streptomyces sp. 6016 (FERM-p 4285) res. S. albus. Fungi, G.poS.	Active	Non-active	Active	Active	Non-active	Active
124	[H][C@@]12N\C(N[C@@]1([H])C(=O)NC[C@@H]2O)=N/C1OC(CO)C(OC(N)=O)C(O)C1N(C)C(=O)CN(C)C	[B] Spectromyces griseochromogenes,Streptomyces No. 6241	Active	Non-active	Non-active	Active	Non-active	Active
126	CNC1=CC=C(C=C1)C(=O)CC(O)CCC(C)C1OC(=O)CC(O)CC(O)CC(O)CC(O)CC(O)CC(O)CC2(O)CC(O)C(C(CC(OC3OC(C)C(O)C(N)C3O)\C=C\C=C\C=C\C=C\C=C\C=C\C=C\C1C)O2)C(O)=O	[B] Actinoplanes caerulens (NRRL 5325, FERM-p 2931)	Active	Non-active	Non-active	Active	Non-active	Active
127	[H][C@@]1(C)NC(=O)C(=C)NC(=O)C(C)NC(=O)C(N[C@@H]2C=CC3=C(N=C(C=C3C(C)O)C(=O)OC(C)C3NC(=S)C4=CSC(=N4)C(NC(=O)C4CSC(=N4)\C(NC(=O)C(NC(=O)C4=CSC(=N4)[C@@]4(CCC(N[C@@H]4C4=CSC3=N4)C3=NC(=CS3)C(=O)NC(=C)C(=O)NC(=C)C(N)=O)NC1=O)C(C)O)=C\C)C(C)(O)C(C)O)[C@H]2O)C(C)CC	[B] Micromonospora arborensis (NRRL 8041)	Active	Non-active	Active	Active	Non-active	Active
128	[H][C@]12SCC(OC)=C(N1C(=O)[C@H]2N)C(O)=O	[semisynth.]	Non-active	Non-active	Non-active	Active	Non-active	Active
129	COC1=CC=C2C[C@H](N)C(=O)N[C@@H](C(O)C(N)=O)C(=O)N[C@@H](CC3=CC=C(OC1=C2)C=C3)C(O)=O	[F] Penicillium rugulosum	Active	Active	Non-active	Active	Active	Non-active
130	N[C@H]1CC2=CC=C(O)C(OC3=CC=C(C[C@H](NC(=O)[C@@H](NC1=O)C(O)C(N)=O)C(O)=O)C=C3)=C2	[F] Penicillium rugulosum	Active	Active	Non-active	Active	Non-active	Non-active
131	COC1=CC=C2C[C@H](N)C(=O)N[C@@H](CC(N)=O)C(=O)N[C@@H](CC3=CC=C(OC1=C2)C=C3)C(O)=O	[F] Penicillium rugulosum	Active	Active	Non-active	Active	Active	Non-active
132	N[C@H]1CC2=CC=C(O)C(OC3=CC=C(C[C@H](NC(=O)[C@H](CC(N)=O)NC1=O)C(O)=O)C=C3)=C2	[F] Penicillium rugulosum	Active	Active	Non-active	Active	Active	Non-active
134	CCC(=O)C1=C(O)O[C@H](C)C(=N1)C(O)=O	[F] Penicillium thomii (ifo 7984)	Active	Active	Non-active	Non-active	Non-active	Non-active
135	[H][C@]12SCC(COC(N)=O)=C(N1C(=O)[C@]2(NC(=O)CCCC(NCC(N)=O)C(O)=O)OC)C(O)=O	[B] Streptomyces clavuligerus pa-32413 (FERM-p 4925)	Active	Non-active	Active	Active	Non-active	Active
136	[H][C@@](N)(CCOC1=CC=C(C=C1)C(O)C(=O)N[C@]1(CN(C1=O)C([H])(C(O)=O)C1=CC=C(O)C=C1)NC=O)C(O)=O	[B] Flexibacter alginoliquefaciens yk-49 Streptomyces sp. PA 42702	Active	Non-active	Active	Active	Non-active	Active
137	C[C@@H](NC(=O)[C@H](COC(N)=O)N(C)C(=O)CNC(=O)[C@H](O)CO)C(=O)N[C@H]1CN(C1=O)S(O)(=O)=O	[B] Flexibacter sp. sc 12.681 (ATCC 35208) (Cytophaga johnsonae_x000D_ and Flexibicter sp.	Active	Active	Active	Active	Non-active	Active
138	COC(=O)C1=CC=C(O)C2=NC3=C(N=C12)C(O)=C(C)C(O)=C3C=O	[B] Streptomyces lomondensis sub. galanosa	Active	Non-active	Active	Active	Non-active	Non-active
139	COC1\C=C\C=C(C)\CC(C)C(O)C(C)\C=C(C)\C=C(OC)\C(=O)OC1C(C)C(O)C(C)C(=O)\C=C\C(C)C(C)O	[B] Streptomyces sp.	Active	Active	Active	Active	Non-active	Active
140	[H][C@]12NC(NC3OC(COC(=O)C(CO)NC(=O)C(CC)C(=O)NC(C)C(O)=O)C(OC(N)=O)C(O)C3N(C)C(=O)CNC)=N[C@]1([H])C(=O)NC[C@H]2O	[B] Streptomyces sp. sf-2111 (FERM-p 5350)	Active	Non-active	Active	Active	Non-active	Active
141	CC1=CC2=C(C(=O)C3=C(C=CC=C3O)C2=O)C2=C1C(=O)C=C(O2)C1(CO1)C1CO1	[B] Streptomyces sp.	Active	Active	Active	Active	Non-active	Active
142	[H][C@]12NC(NC3OC(CO)C(OC(N)=O)C(O)C3N(C)C(=O)CNC)=N[C@]1([H])C(=O)NC[C@H]2O	[B] Streptomyces aciculatus a-269 (FERM-p 6243, IFO 14139),_x000D_ S.griseochromogenes	Active	Non-active	Active	Active	Non-active	Active
143	CC(NC(=O)C(C)NC(=O)C(N)CCP(C)(O)=O)C(O)=O	[B] Streptomyces viridochromogenes Tue 494, S.hygroscopicus	Active	Non-active	Active	Non-active	Non-active	Active
144	CCCCC1OC(=O)CNC(=O)C(NC(=O)C(CO)NC(=O)C(NC(=O)C(CC(C)C)N(C)C(=O)C1C)C(C)CC)C(C)O	[B] Streptomyces hygroscopicus sf-1902 (FERM-p 3277)	Active	Non-active	Active	Active	Non-active	Active
145	CCCCCCC1OC(=O)CNC(=O)C(NC(=O)C(CO)NC(=O)C(NC(=O)C(CC(C)C)N(C)C(=O)C1C)C(C)C)C(C)O	[B] Streptomyces hygroscopicus sf-1902 (FERM-p 3277)	Active	Non-active	Active	Active	Non-active	Active
146	CCCCCCCC1OC(=O)CNC(=O)C(NC(=O)C(CO)NC(=O)C(NC(=O)C(CC(C)C)N(C)C(=O)C1C)C(C)CC)C(C)O	[B] Streptomyces hygroscopicus sf-1902 (FERM-p 3277)	Active	Non-active	Active	Active	Non-active	Active
147	CC[C@H]1[C@@H](O)[C@H](C)C\C(C)=C\C=C\[C@H](OC)[C@H](OC(=O)\C(OC)=C\C(C)=C\[C@@H](C)[C@H]1O)[C@@H](C)[C@@H](O)[C@H](C)[C@@]1(O)C[C@@H](OC2CC(O)C(OC(N)=O)C(C)O2)[C@H](C)[C@H](O1)\C=C\C	[B] S. diastatochromogenes a-661 (FERM-p 1341), S. sp. x-5357 (NRRL_x000D_ 11082), S.neyagawaensis, Streptomyces purpurascens S-45628	Active	Non-active	Active	Active	Active	Active
148	C[C@H]1C[C@@H](C)[C@@H](CC2=CN=CO2)OC(=O)\C(C)=C\[C@@H](C)C[C@@H](C)[C@@H](CC2=CN=CO2)OC(=O)\C(C)=C\1	[B] Streptomyces conglobatus	Non-active	Non-active	Non-active	Active	Non-active	Active
149	CNC(=N)NCCC\C=C\CCC[C@H](C)C[C@H](C)C1OC(=O)\C=C\C(C)C(O)CC(O)C(C)C(O)CCC(C)C(O)CC2(O)OC(CC(O)C2O)CC(CC(O)CC(O)C(C)C(O)\C=C\C1C)OC(=O)CC(O)=O	[B] Streptomyces hygroscopicus var. crystallogenes, S. violaceoniger_x000D_ Tue 905	Active	Non-active	Active	Active	Non-active	Active
150	COC(=O)N\C=C\CCC(C)C1=CC(O)=C(C(=O)O1)C(=O)C(\C)=C\C=C(/C)CCC(O)C(\C)=C/C\C=C\C	[M] Corallococcus (Myxococcus) coralloides	Active	Non-active	Active	Active	Non-active	Non-active
151	CC\C=C\C\C=C(\C)C(O)CC\C(C)=C\C=C(/C)C(=O)C1=C(O)C=C(OC1=O)C(C)CC\C=C\NC(=O)OC	[M] Corallococcus coralloides	Active	Non-active	Active	Active	Active	Non-active
152	COC(=O)N\C=C\CCC(C)C1=CC(O)=C(C(=O)O1)C(=O)C(C)\C=C\C1(C)CCC(O1)C(\C)=C/C\C=C\C	[M] Corallococcus (Myxococcus) coralloides	Active	Non-active	Active	Active	Non-active	Active
153	NC1=NC=NC2=C1N=CN2C1OC(CO)CC1O	[F] Cordyceps militaris, Aspergillus nidulans	Active	Active	Active	Active	Non-active	Non-active
154	[H]C1NC(=O)C(NCC(=O)C2CSC3=C(CC(NC(=O)C(CC4=CC=CC=C4)NC(=O)C(CCCN)NC1=O)C(=O)NC(C(C)C)C(=O)NC(CCCN)C(=O)NC(CC(C)C)C(=O)NC(C(C)CC)C(=O)N2)C1=C(OC)C=CC=C1N3)C(C)O	[F] Cortinarius speciosissimus, C. orellanus, C. orellanoides and_x000D_ many other cortinarius spp. except C. Violaceus; marine	Non-active	Non-active	Non-active	Active	Non-active	Active
155	CCCCCCCCCCCCC1CC(=O)NC(CCC(O)=O)C(=O)NC(CC(C)C)C(=O)NC(CC(C)C)C(=O)NC(C(C)C)C(=O)NC(CC(=O)O1)C(=O)NC(CC(C)C)C(=O)NC(C(C)C)C(O)=O	[B] Bacillus mesentericus	Active	Non-active	Active	Active	Non-active	Active
[truncated: 1,040 more rows]
